# Supplementary material
Source: PubMed Central journal article supplement (PMC7581224)

## Compound NMR Spectra

### A Catch and Anchor Approach to Combat both Toxicity and Longevity of Botulinum Toxin A

*Lucy Lin<sup>‡, §</sup>, Margaret E. Olson<sup>‡, †§</sup>, Takashi Sugane<sup>‡, †</sup>, Lewis D. Turner<sup>§</sup>, Margarita A. Tararina<sup>||</sup>, Alexander L. Nielsen<sup>§</sup>, Elbek K. Kurbanov<sup>‡, ¶</sup>, Sabine Pellett<sup>⊥</sup>, Eric A. Johnson<sup>⊥</sup>, Seth M. Cohen<sup>¶</sup>, Karen N. Allen<sup>||</sup> and Kim D. Janda<sup>\*, §</sup>*

<sup>§</sup>Departments of Chemistry and Immunology, The Skaggs Institute for Chemical Biology, Worm Institute of Research and Medicine (WIRM), The Scripps Research Institute, 10550 North Torrey Pines Road, La Jolla, California 92037, United States

<sup>||</sup>Department of Chemistry, Boston University, 590 Commonwealth Avenue, Boston, Massachusetts 02215, United States

<sup>¶</sup> Department of Chemistry and Biochemistry, University of California San Diego, 9500 Gilman Drive, La Jolla, California 92093, United States.

<sup>⊥</sup>Department of Bacteriology, University of Wisconsin, 1550 Linden Drive, Madison, Wisconsin 53706, United States

<sup>‡</sup>These authors contributed equally

\*Corresponding author: [kdjanda@scripps.edu](mailto:kdjanda@scripps.edu)

Compound 12  
1H NMR (500 MHz, DMSO-d6)

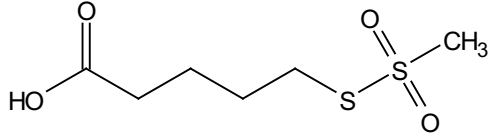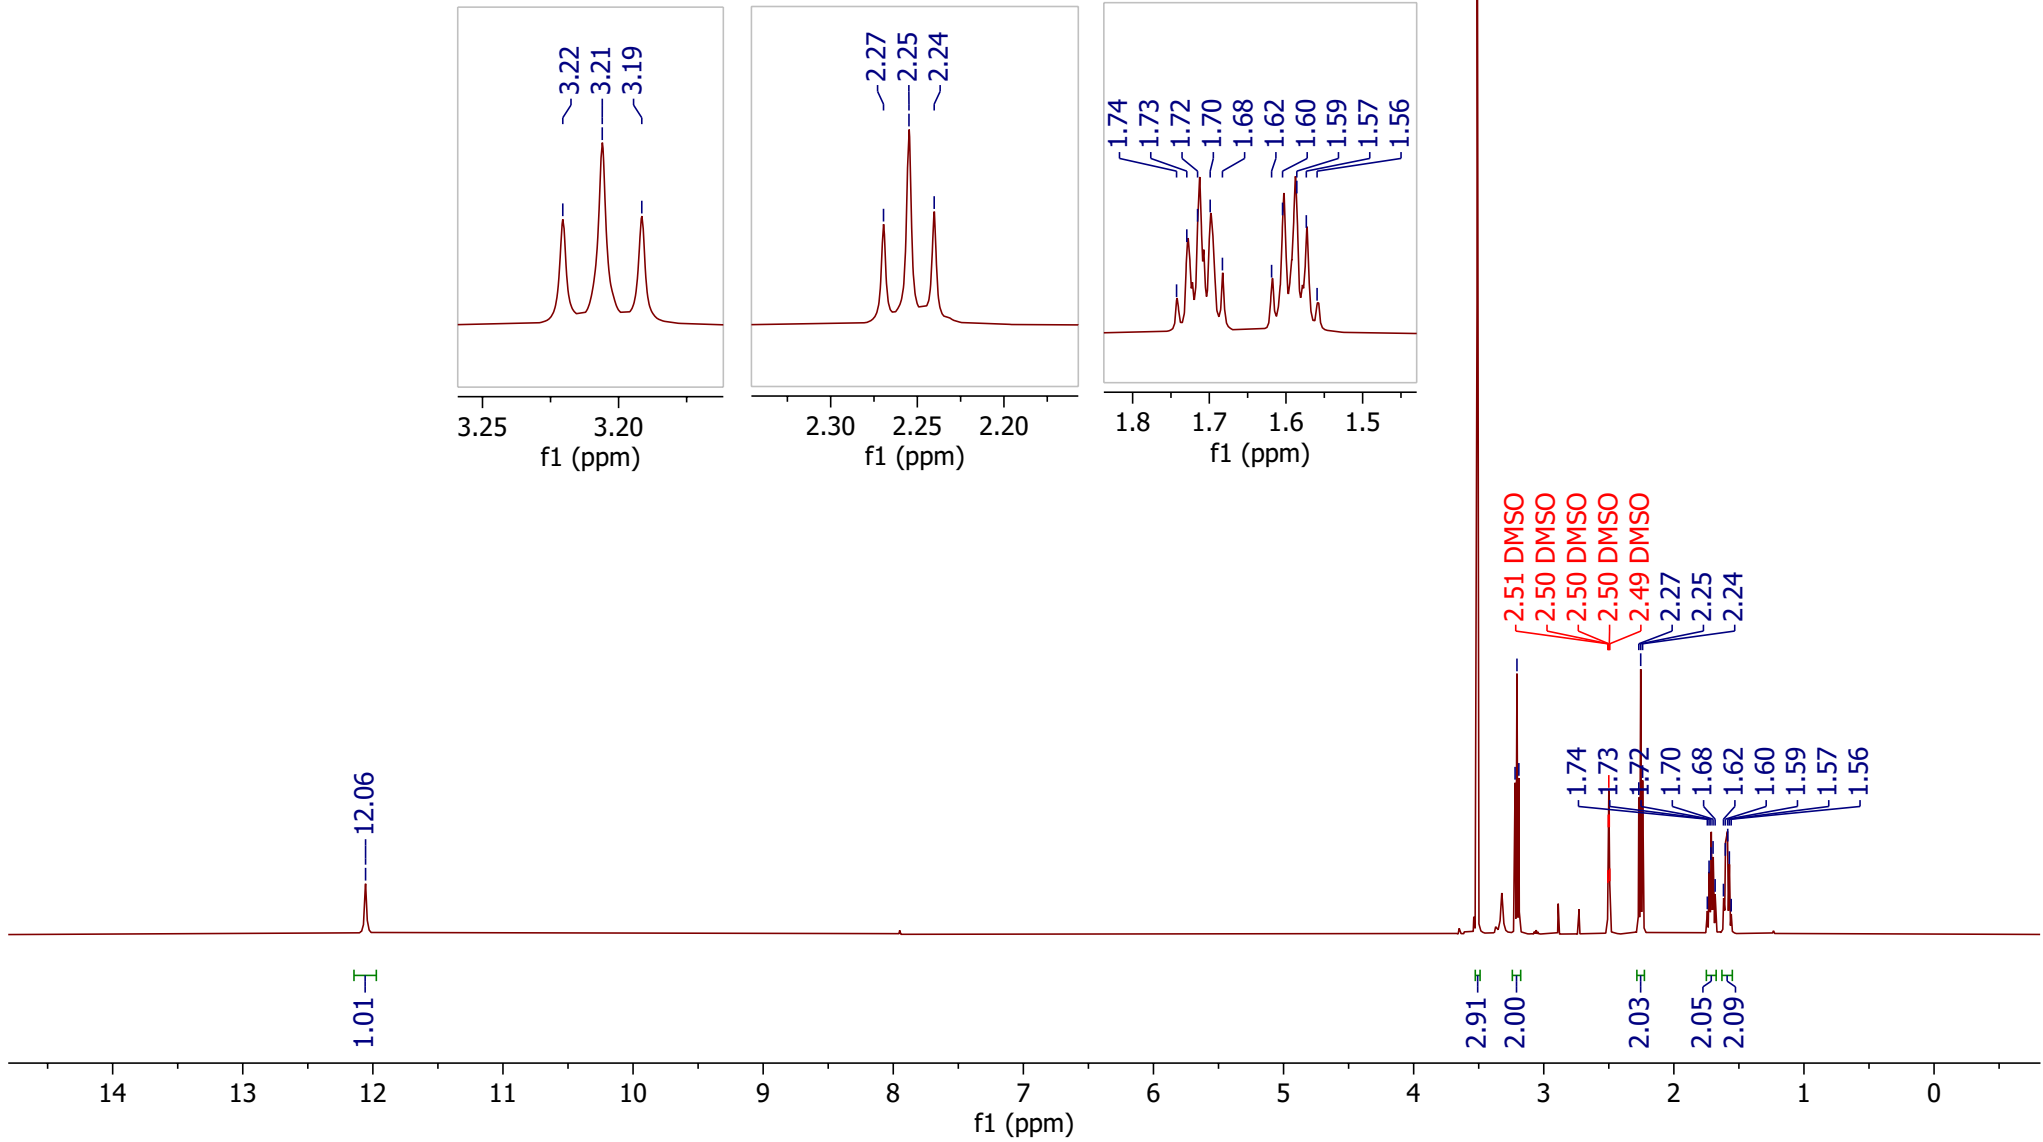

Compound 12  
<sup>1</sup>H NMR (151 MHz, DMSO-d6)

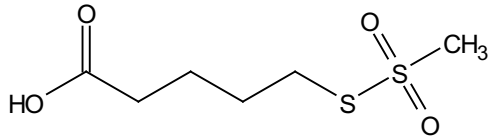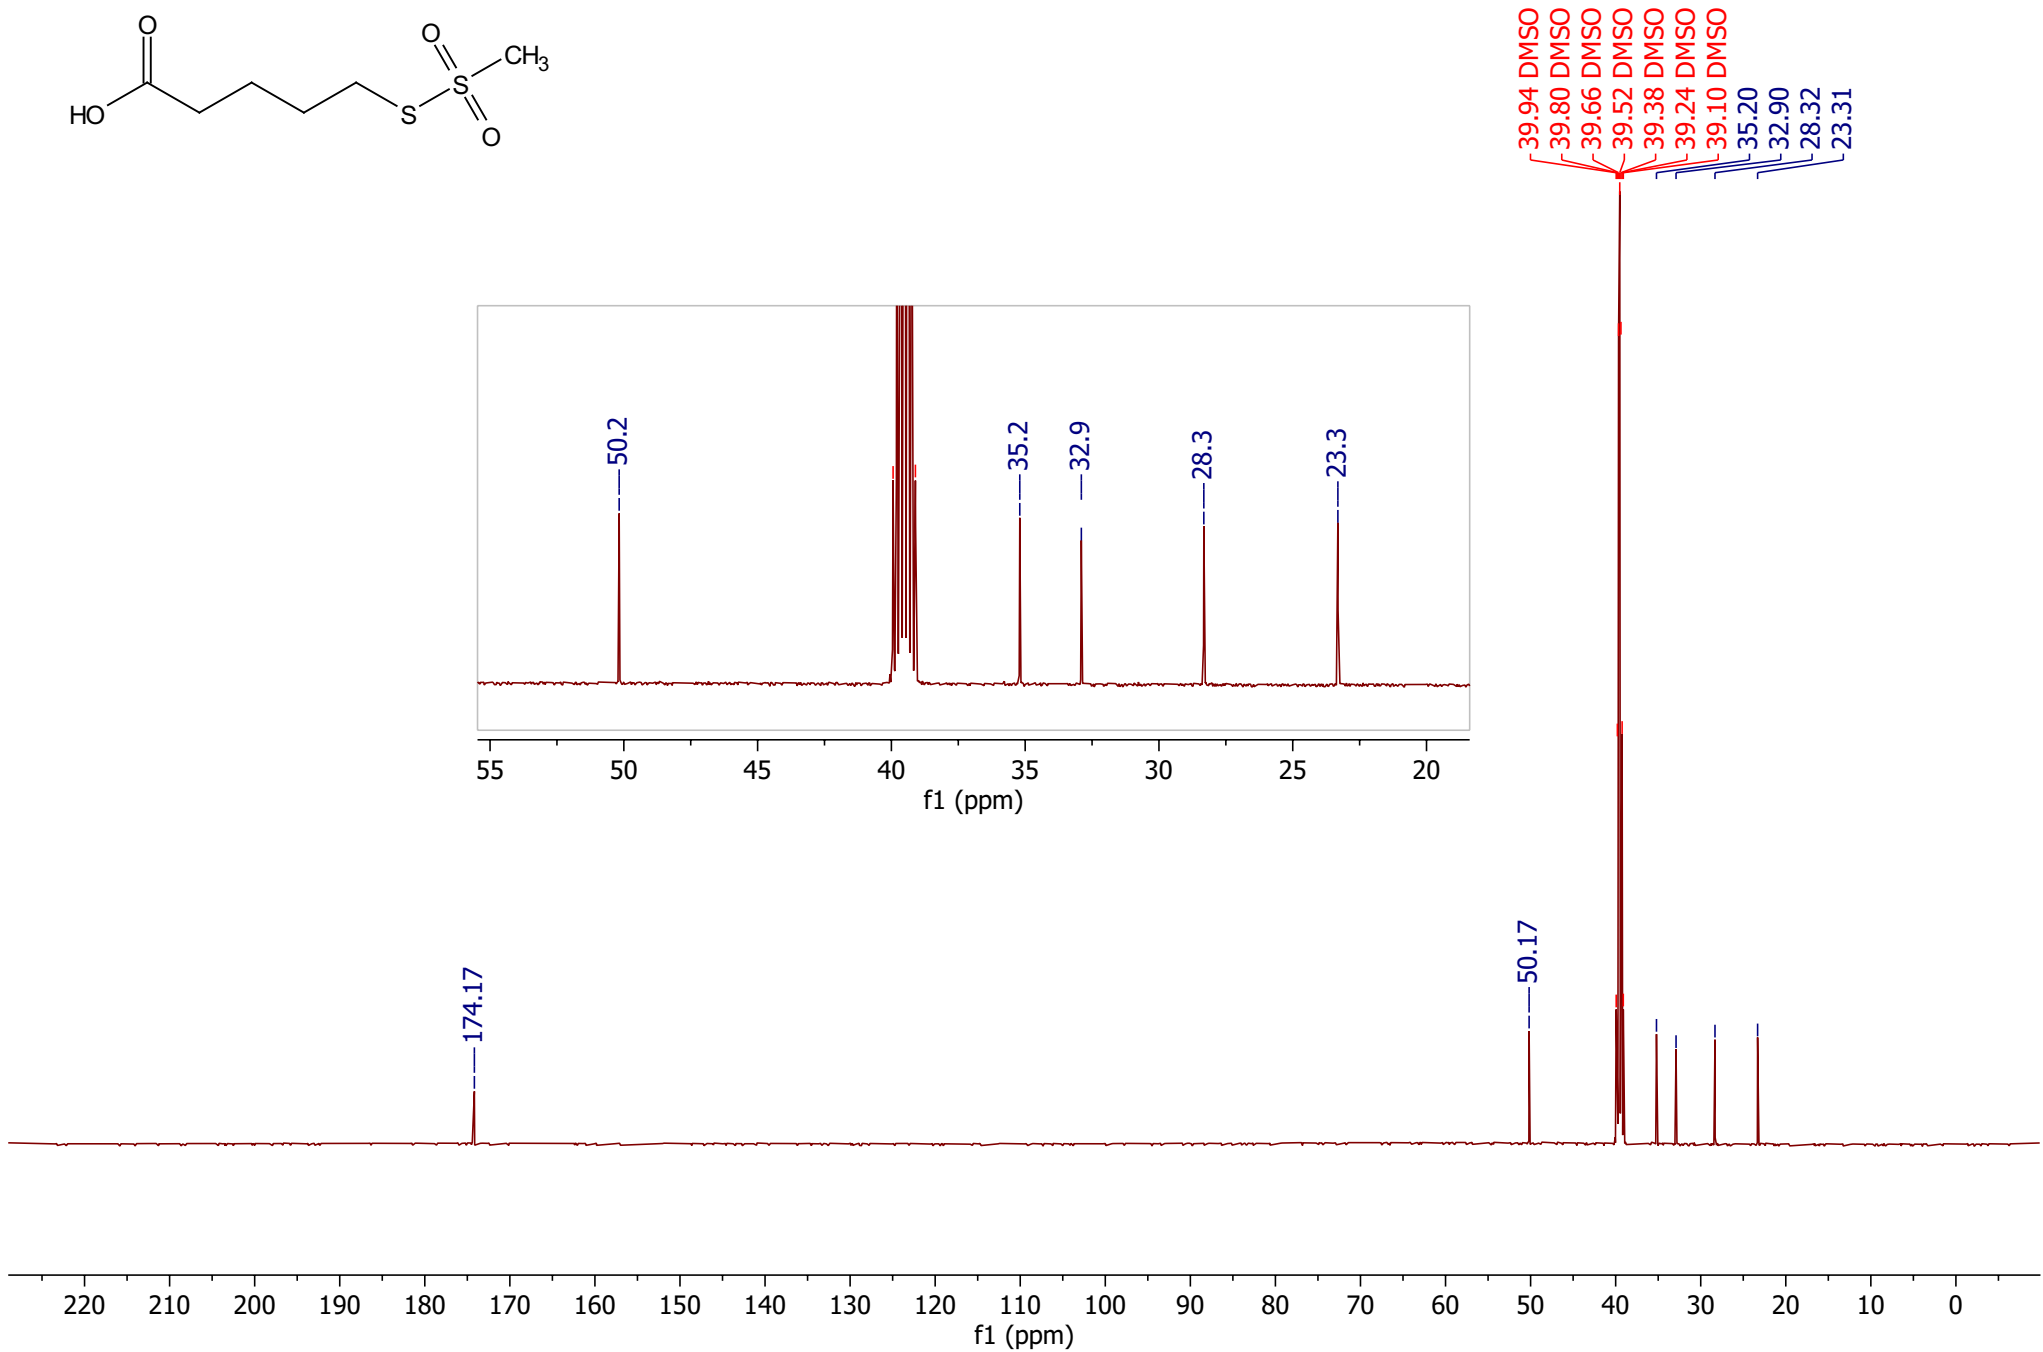

Compound 13  
<sup>1</sup>H NMR (500 MHz, DMSO-d6)

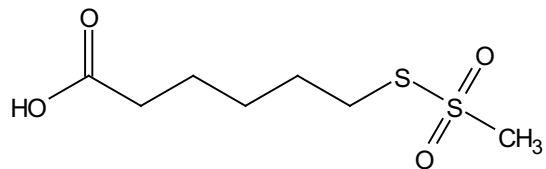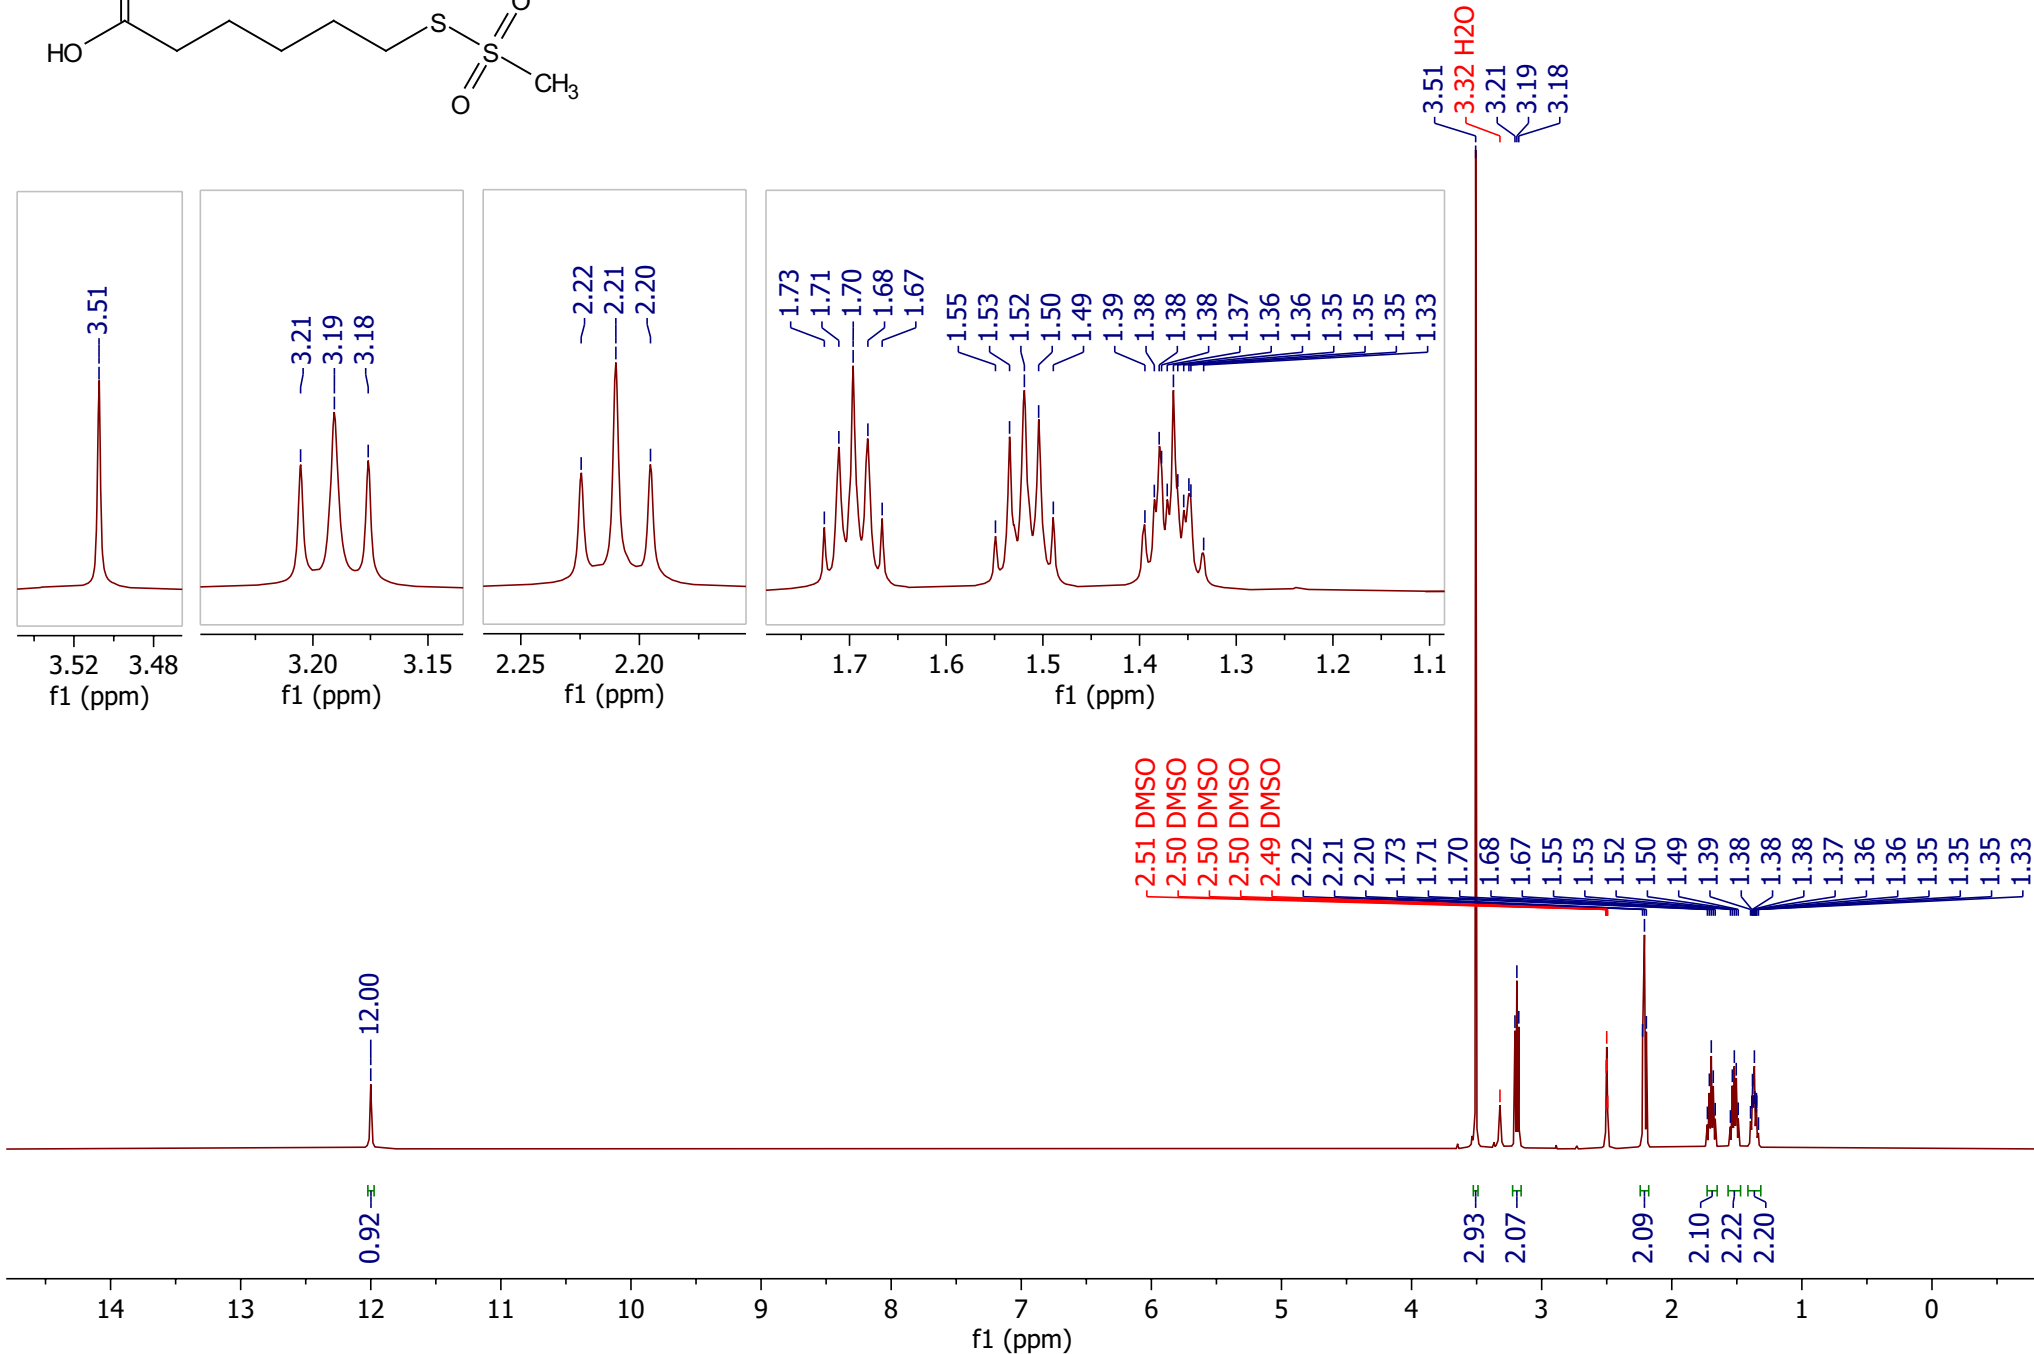

Compound 13  
<sup>1</sup>H NMR (151 MHz, DMSO-d6)

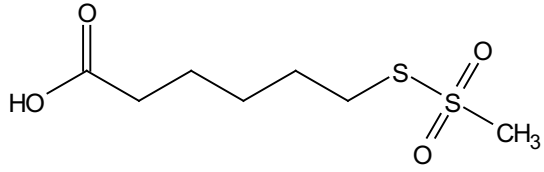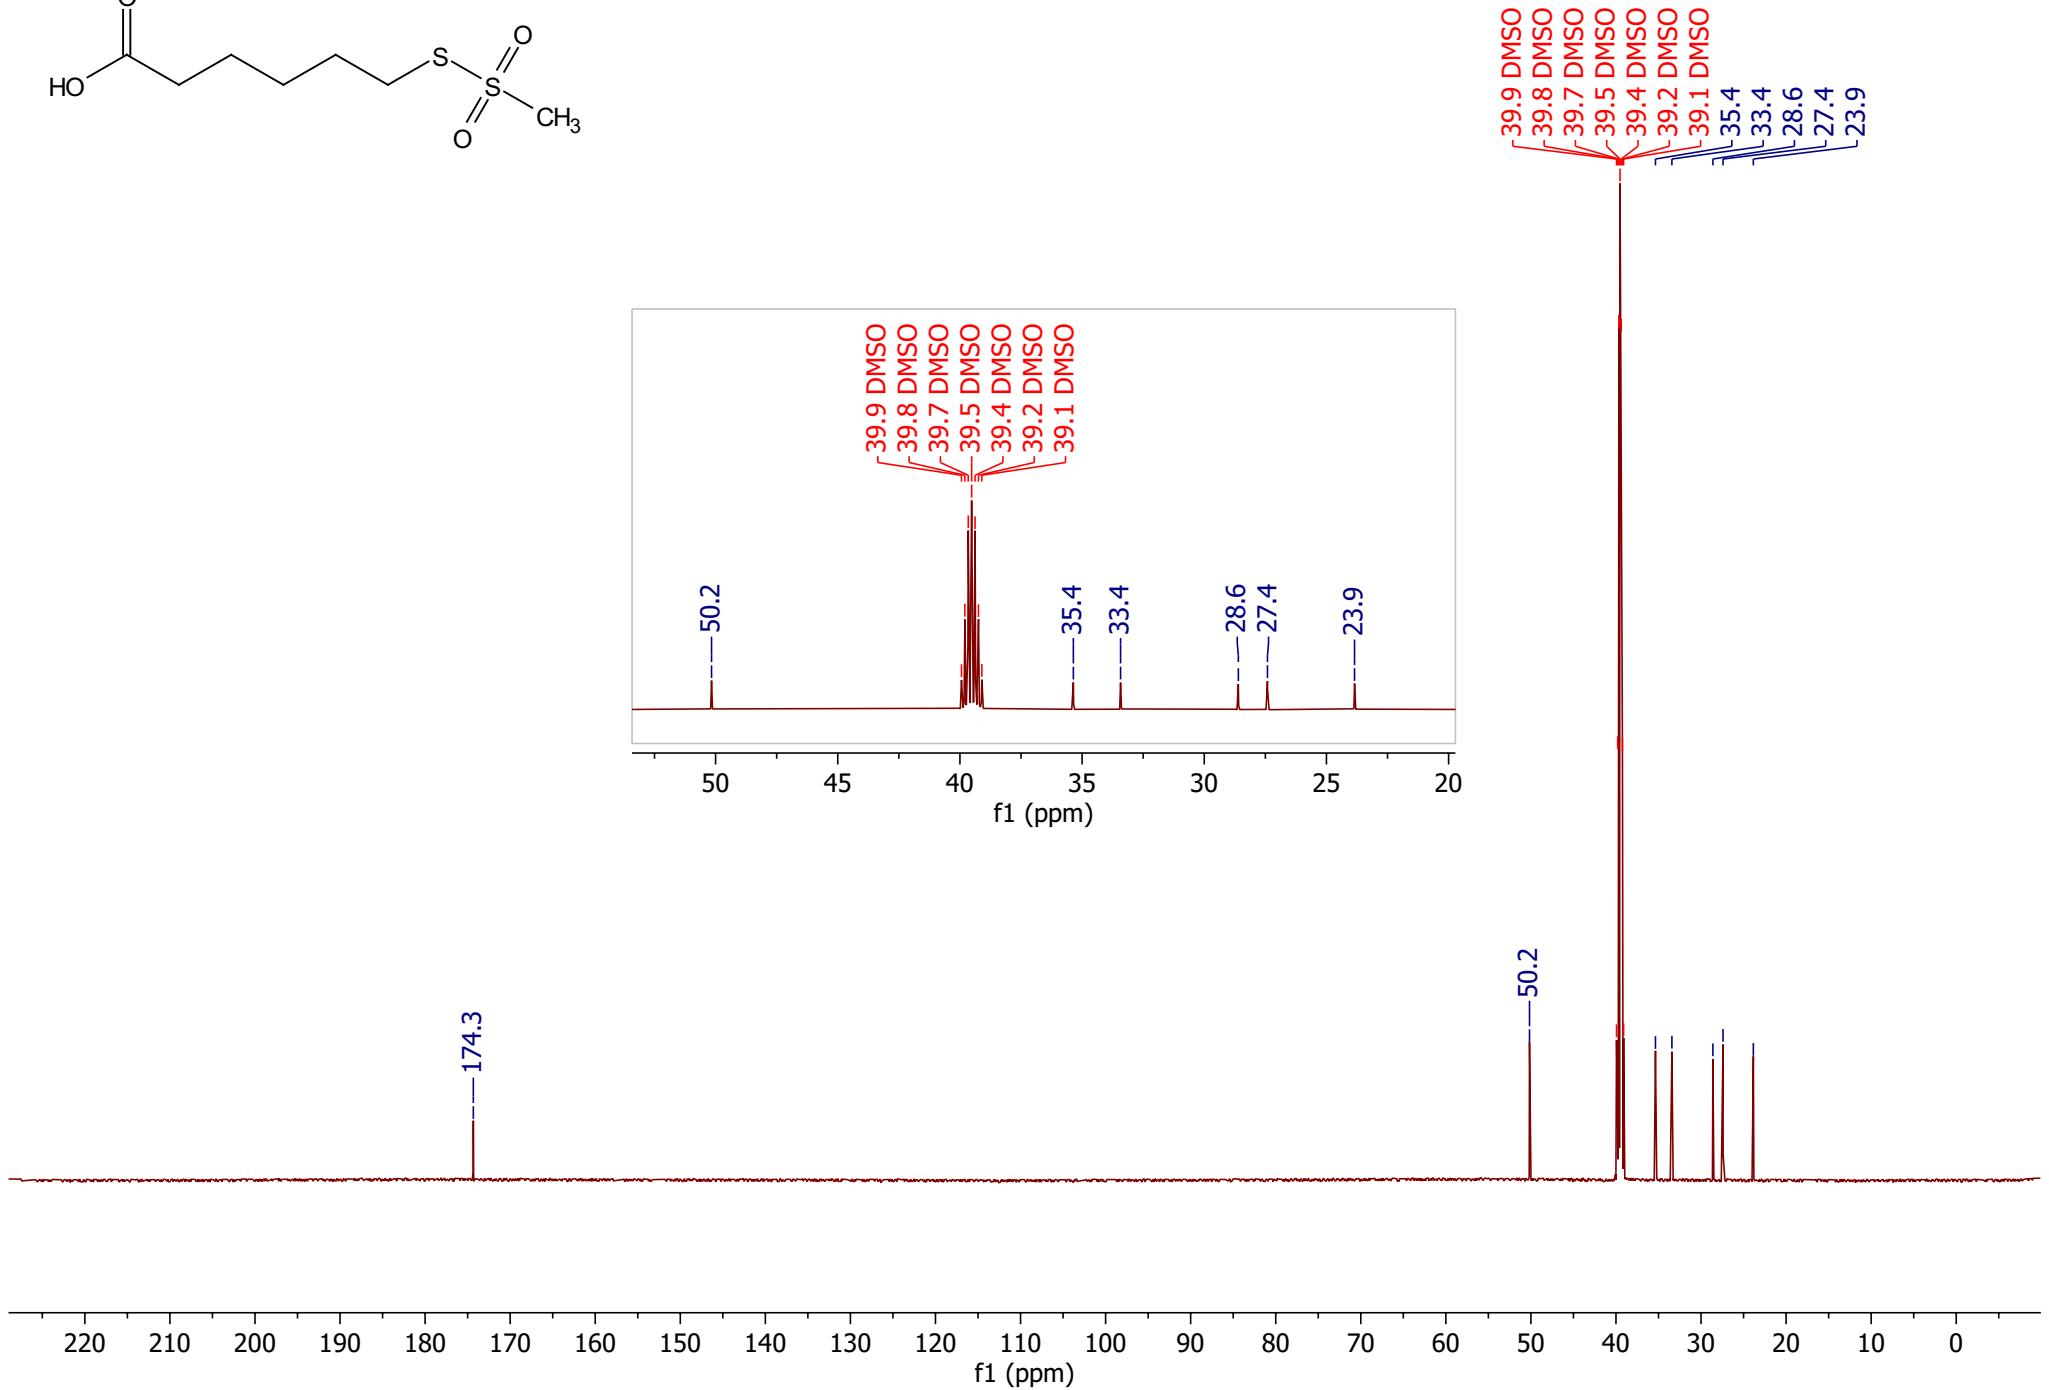

Compound 14  
<sup>1</sup>H NMR (500 MHz, DMSO-d6)

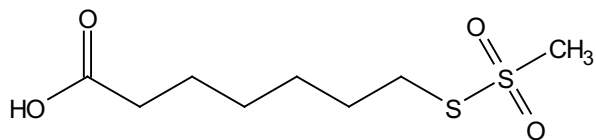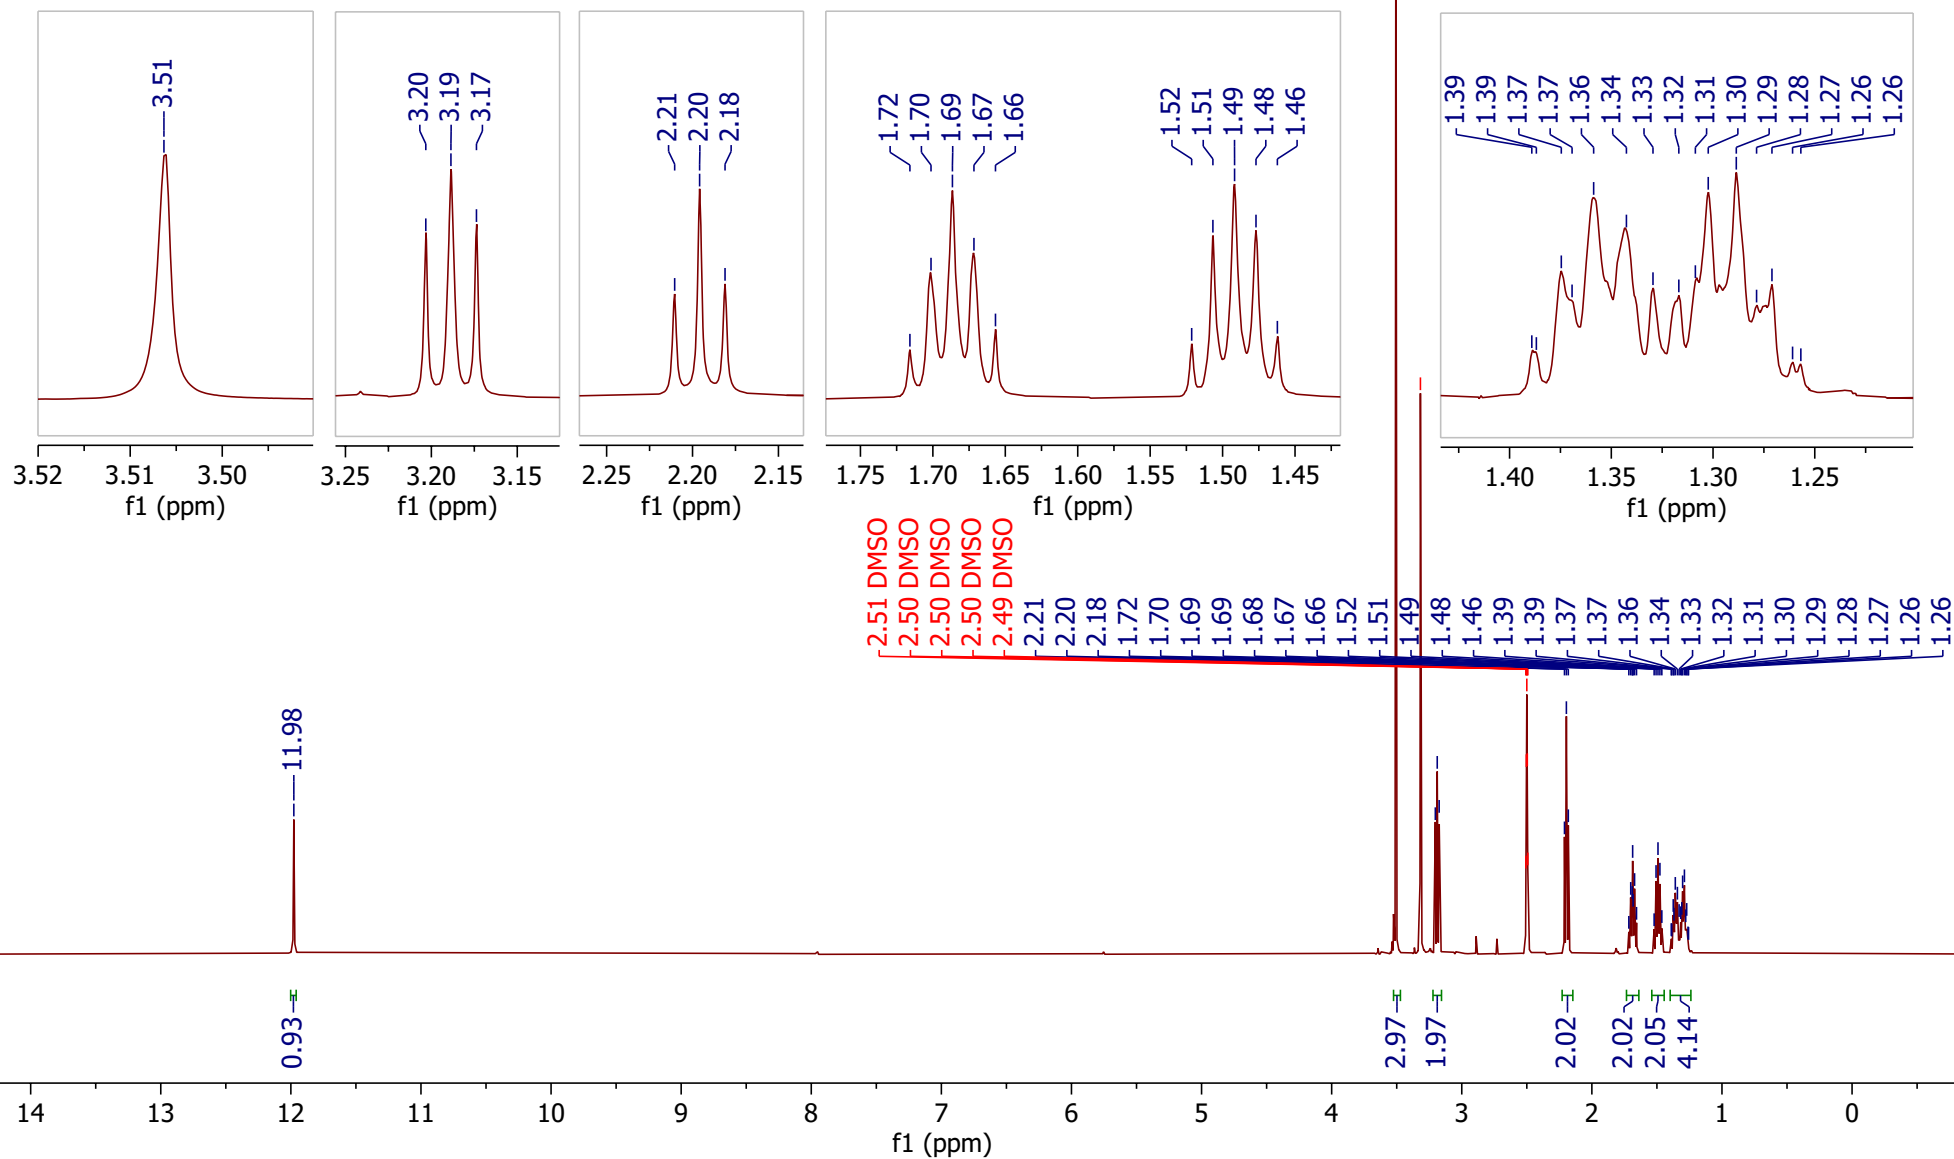

Compound 14  
<sup>1</sup>H NMR (126 MHz, DMSO-d6)

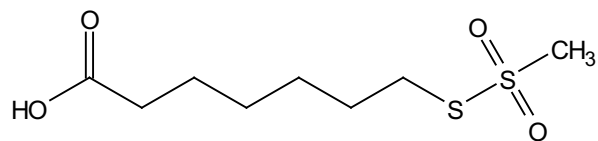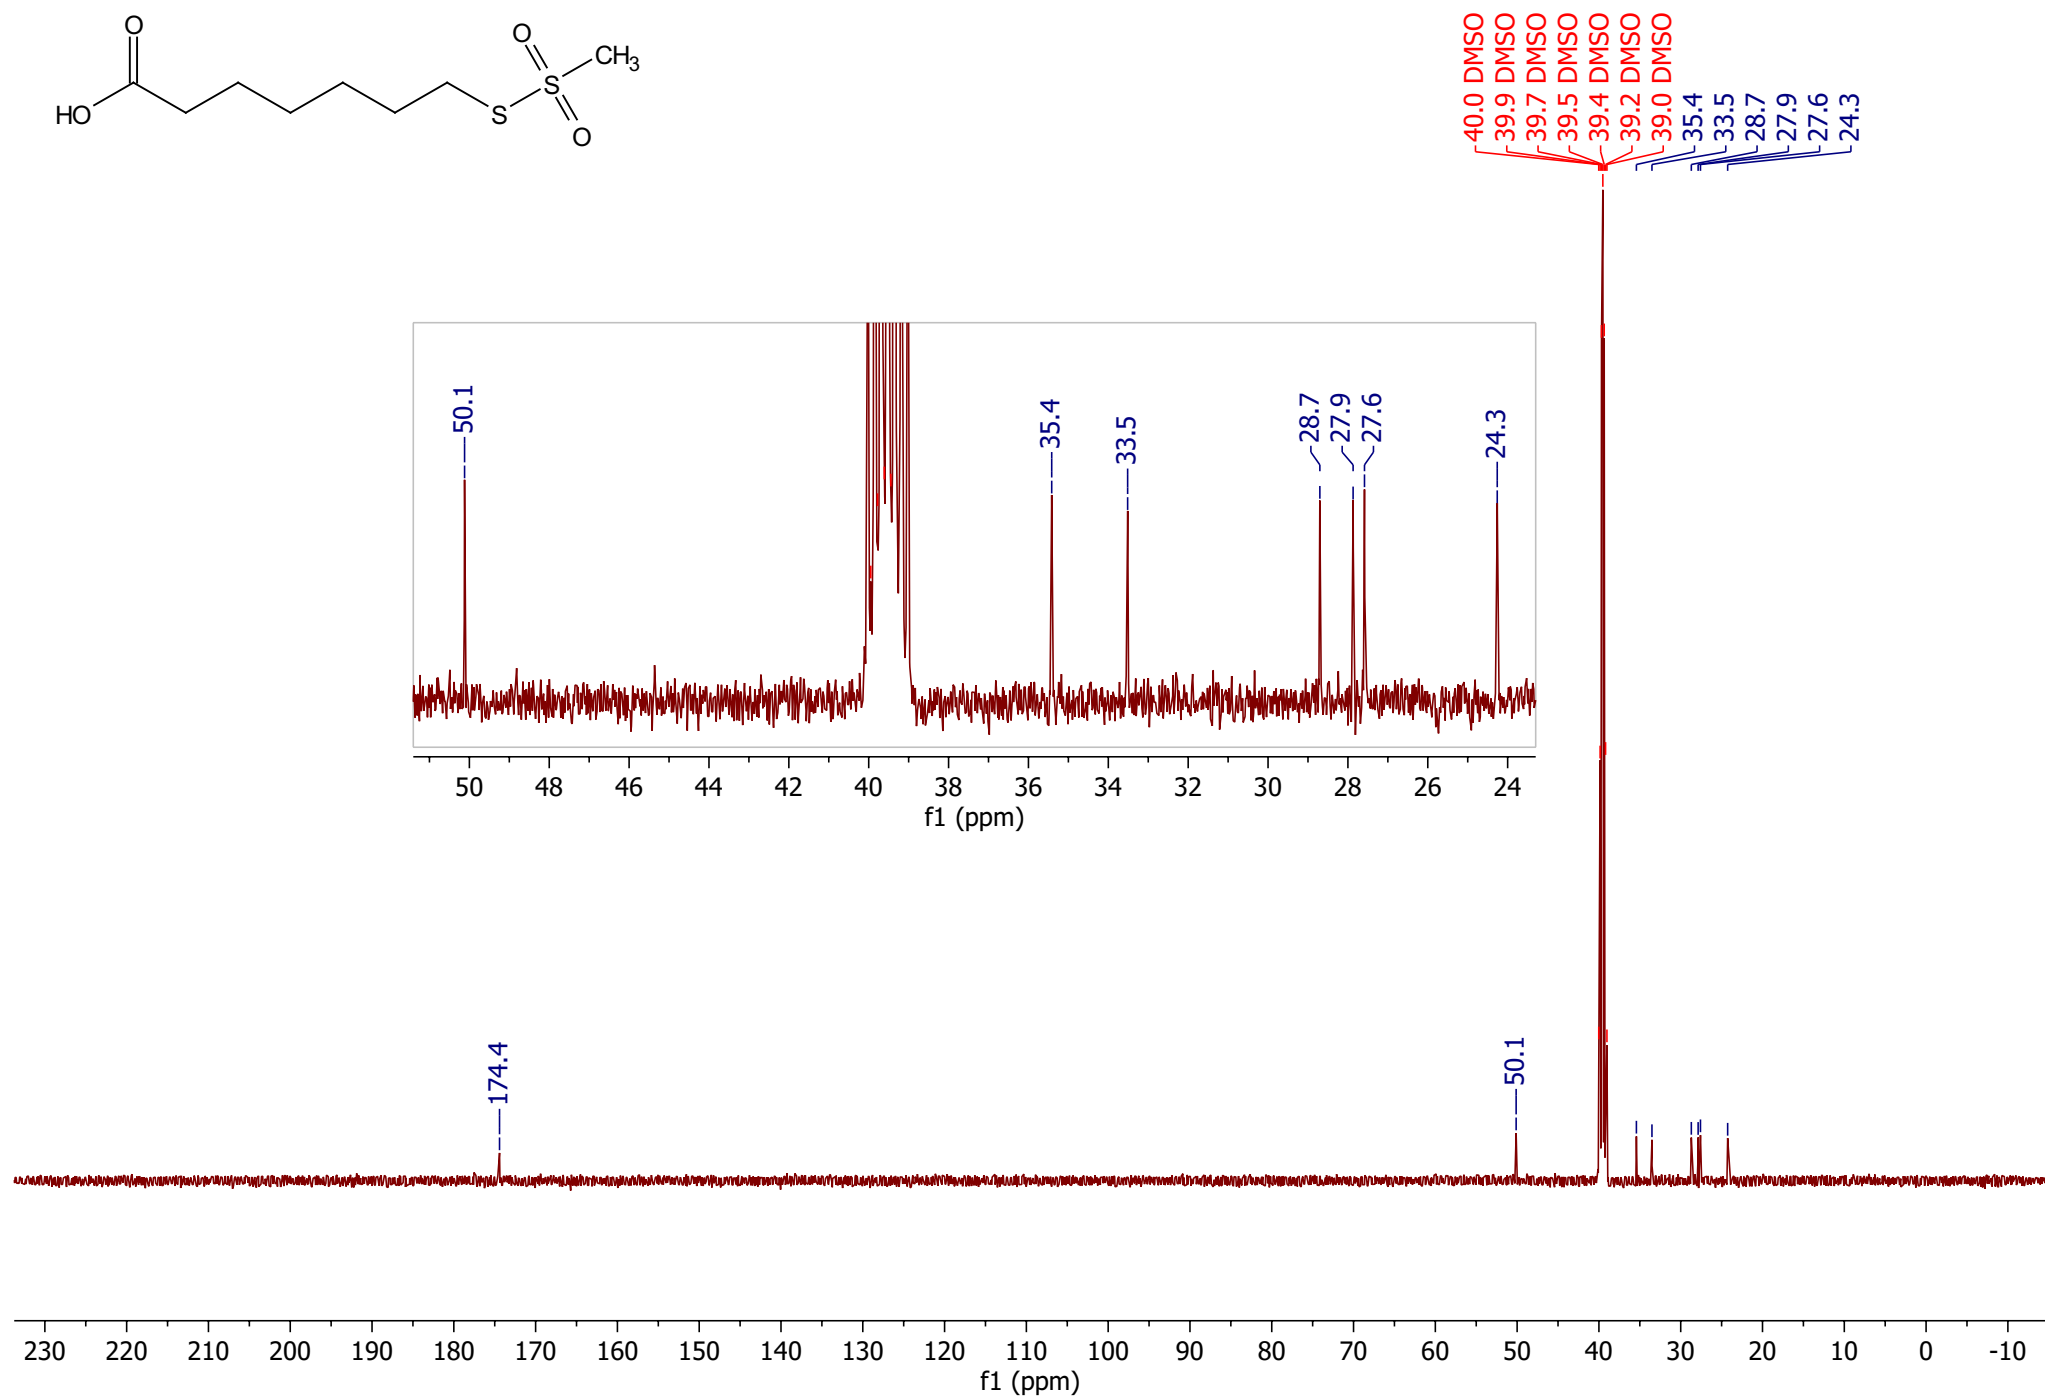

Compound 15  
<sup>1</sup>H NMR (500 MHz, DMSO-d<sub>6</sub>)

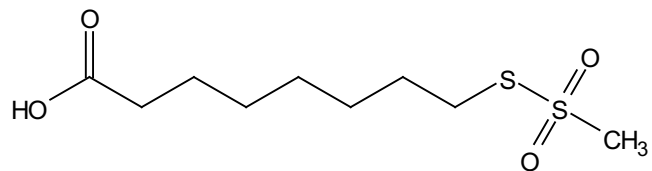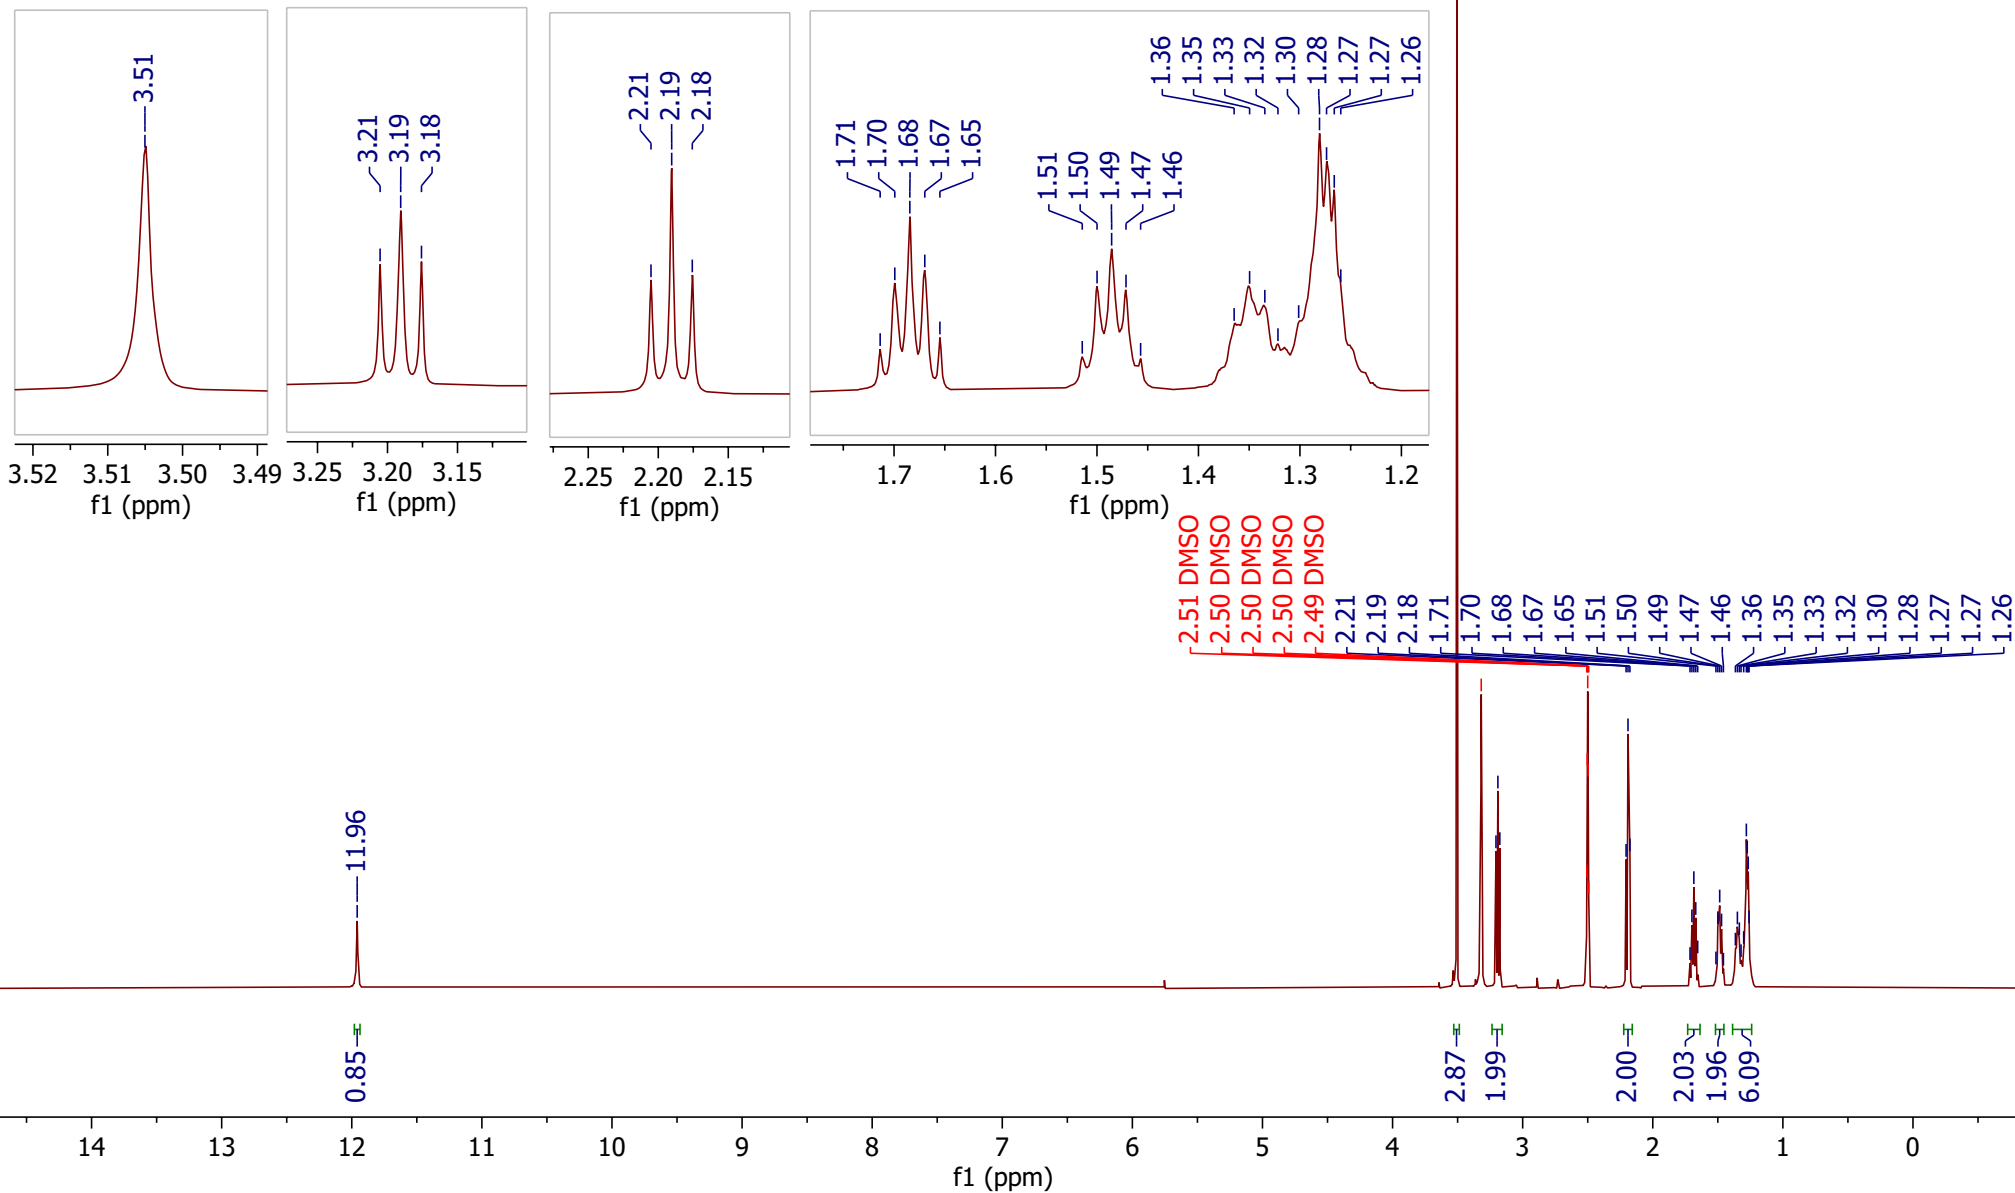



Compound 15  
<sup>1</sup>H NMR (151 MHz, DMSO-d6)

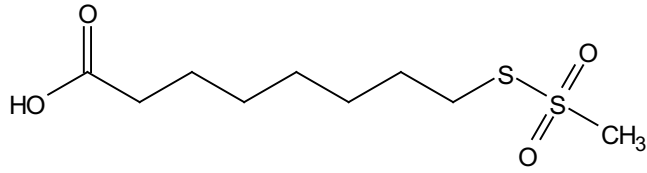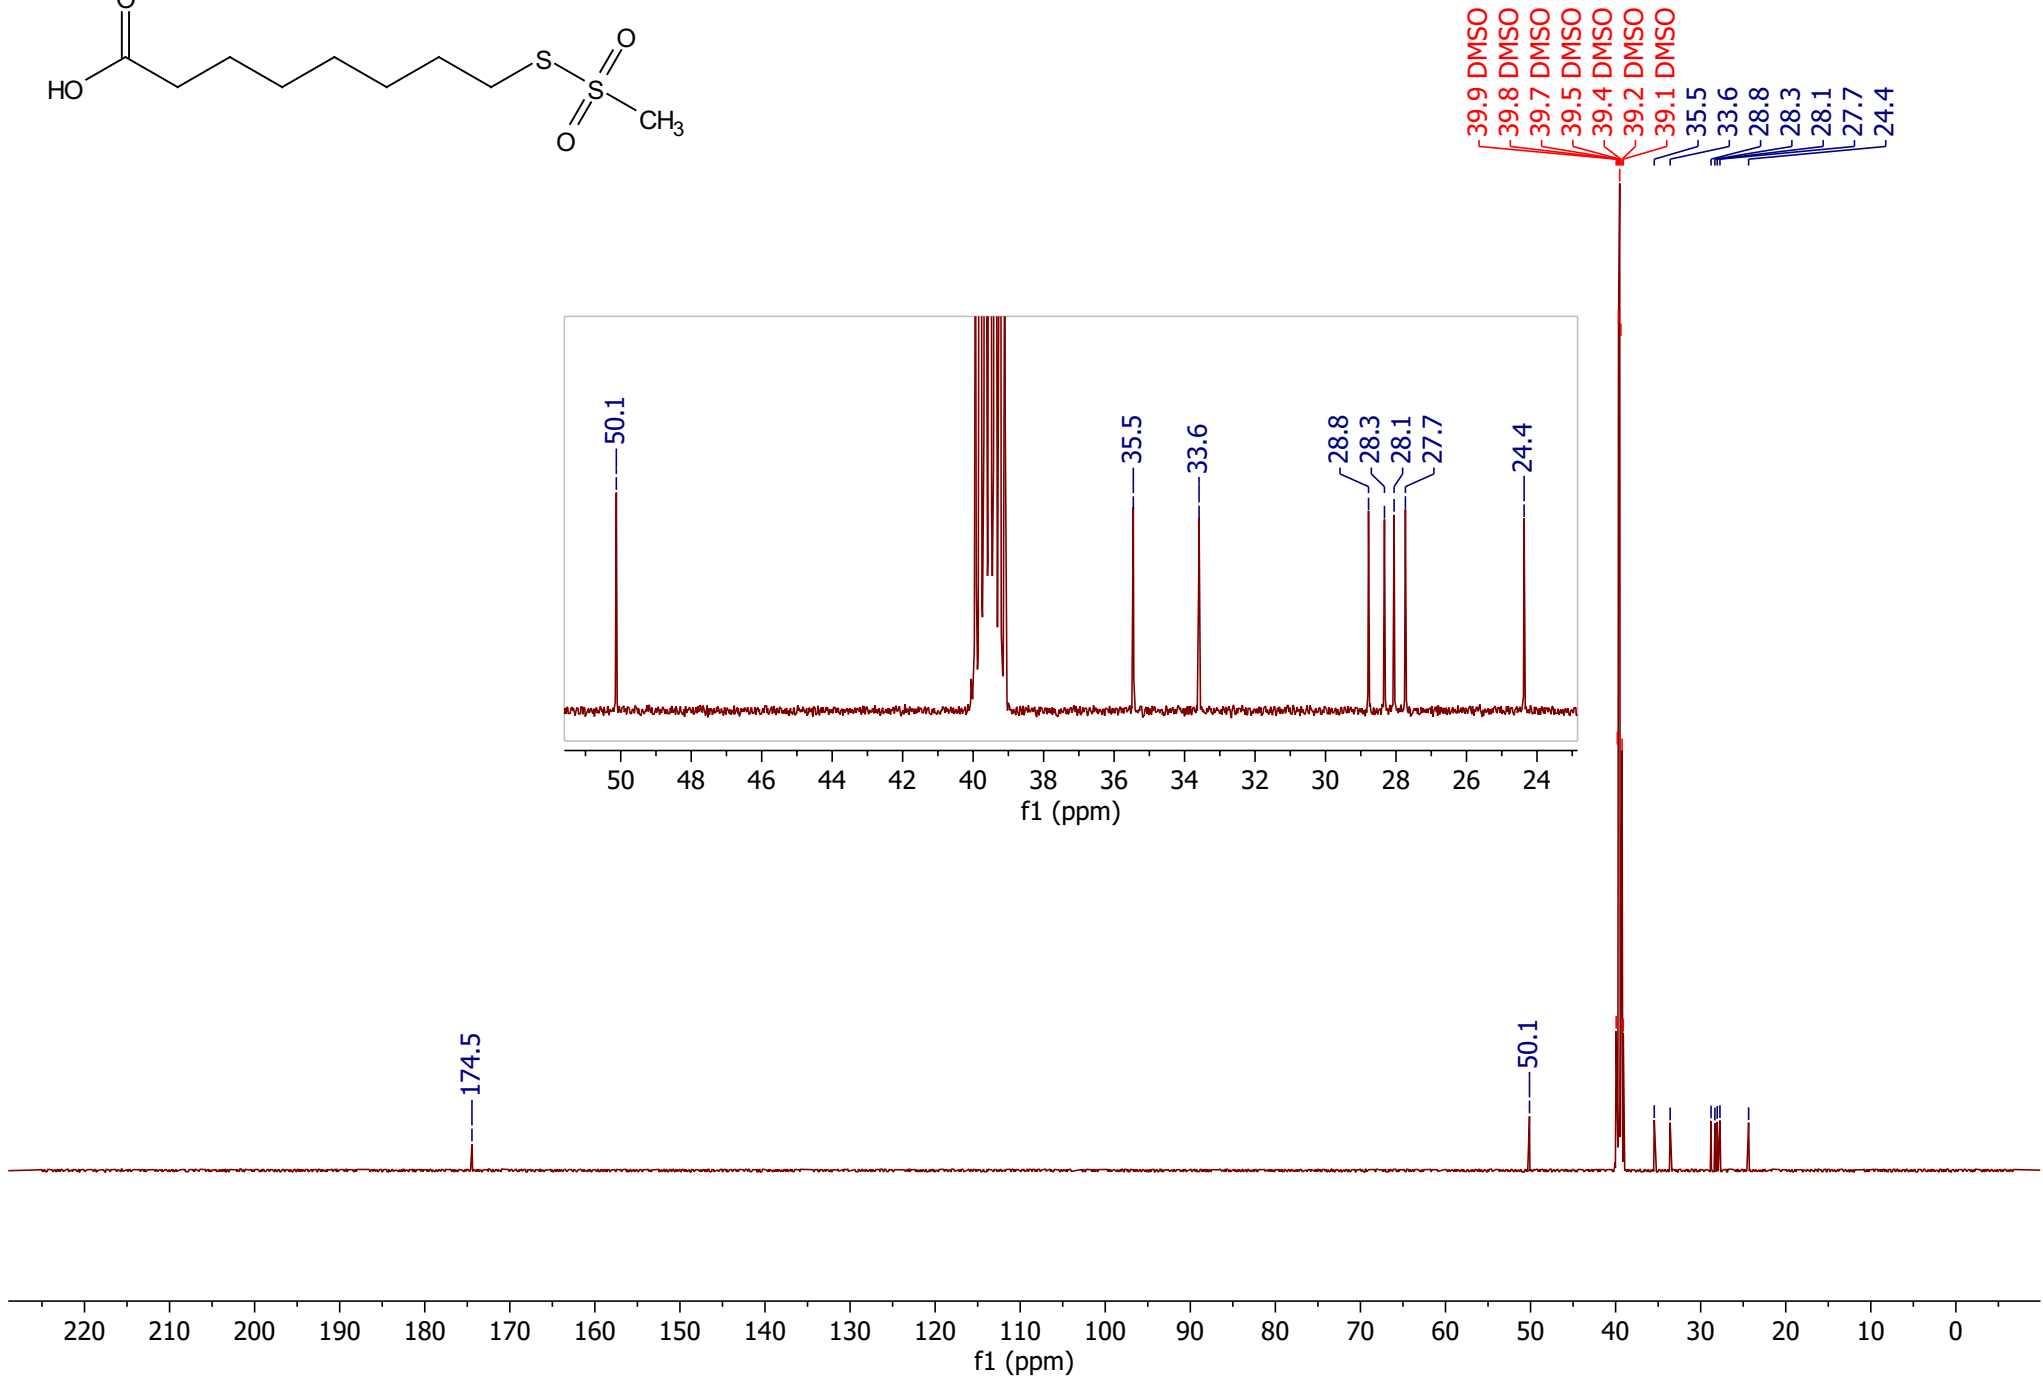

Compound 16  
<sup>1</sup>H NMR (400 MHz, MeOD-d4)

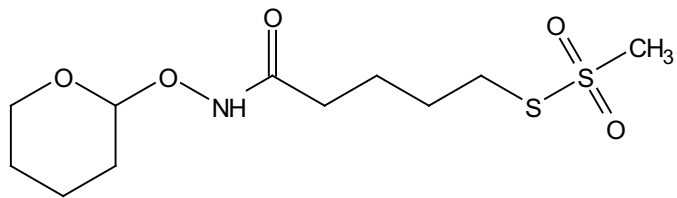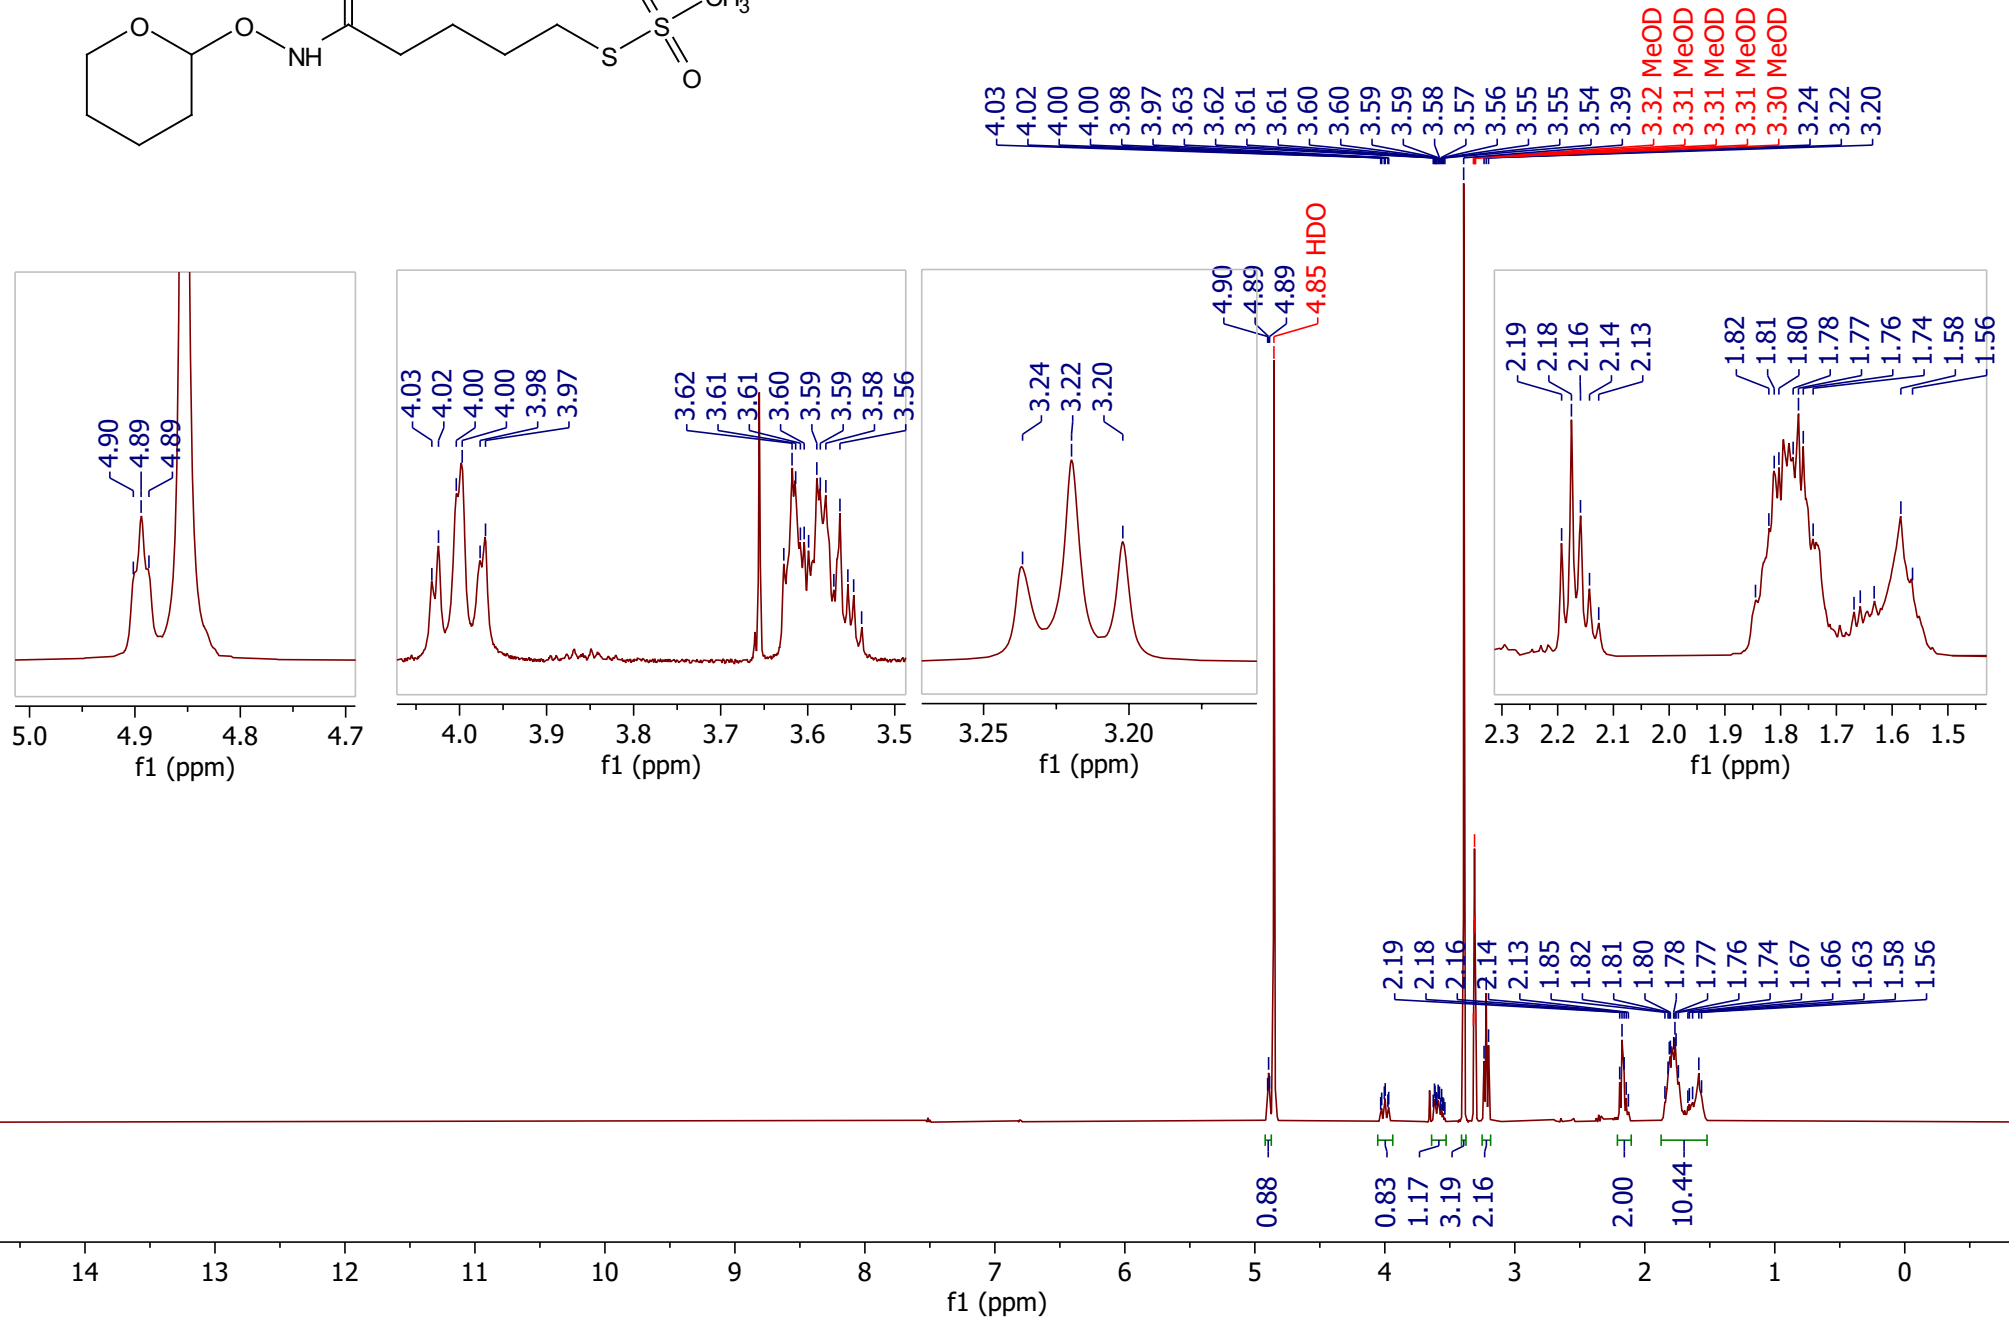

Compound 16  
<sup>1</sup>H NMR (151 MHz, MeOD-d4)

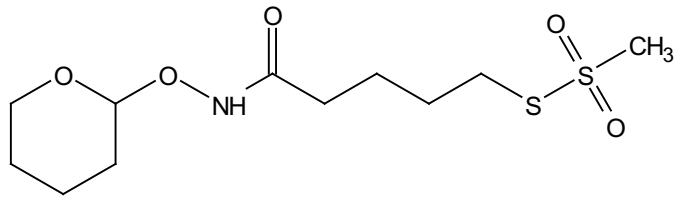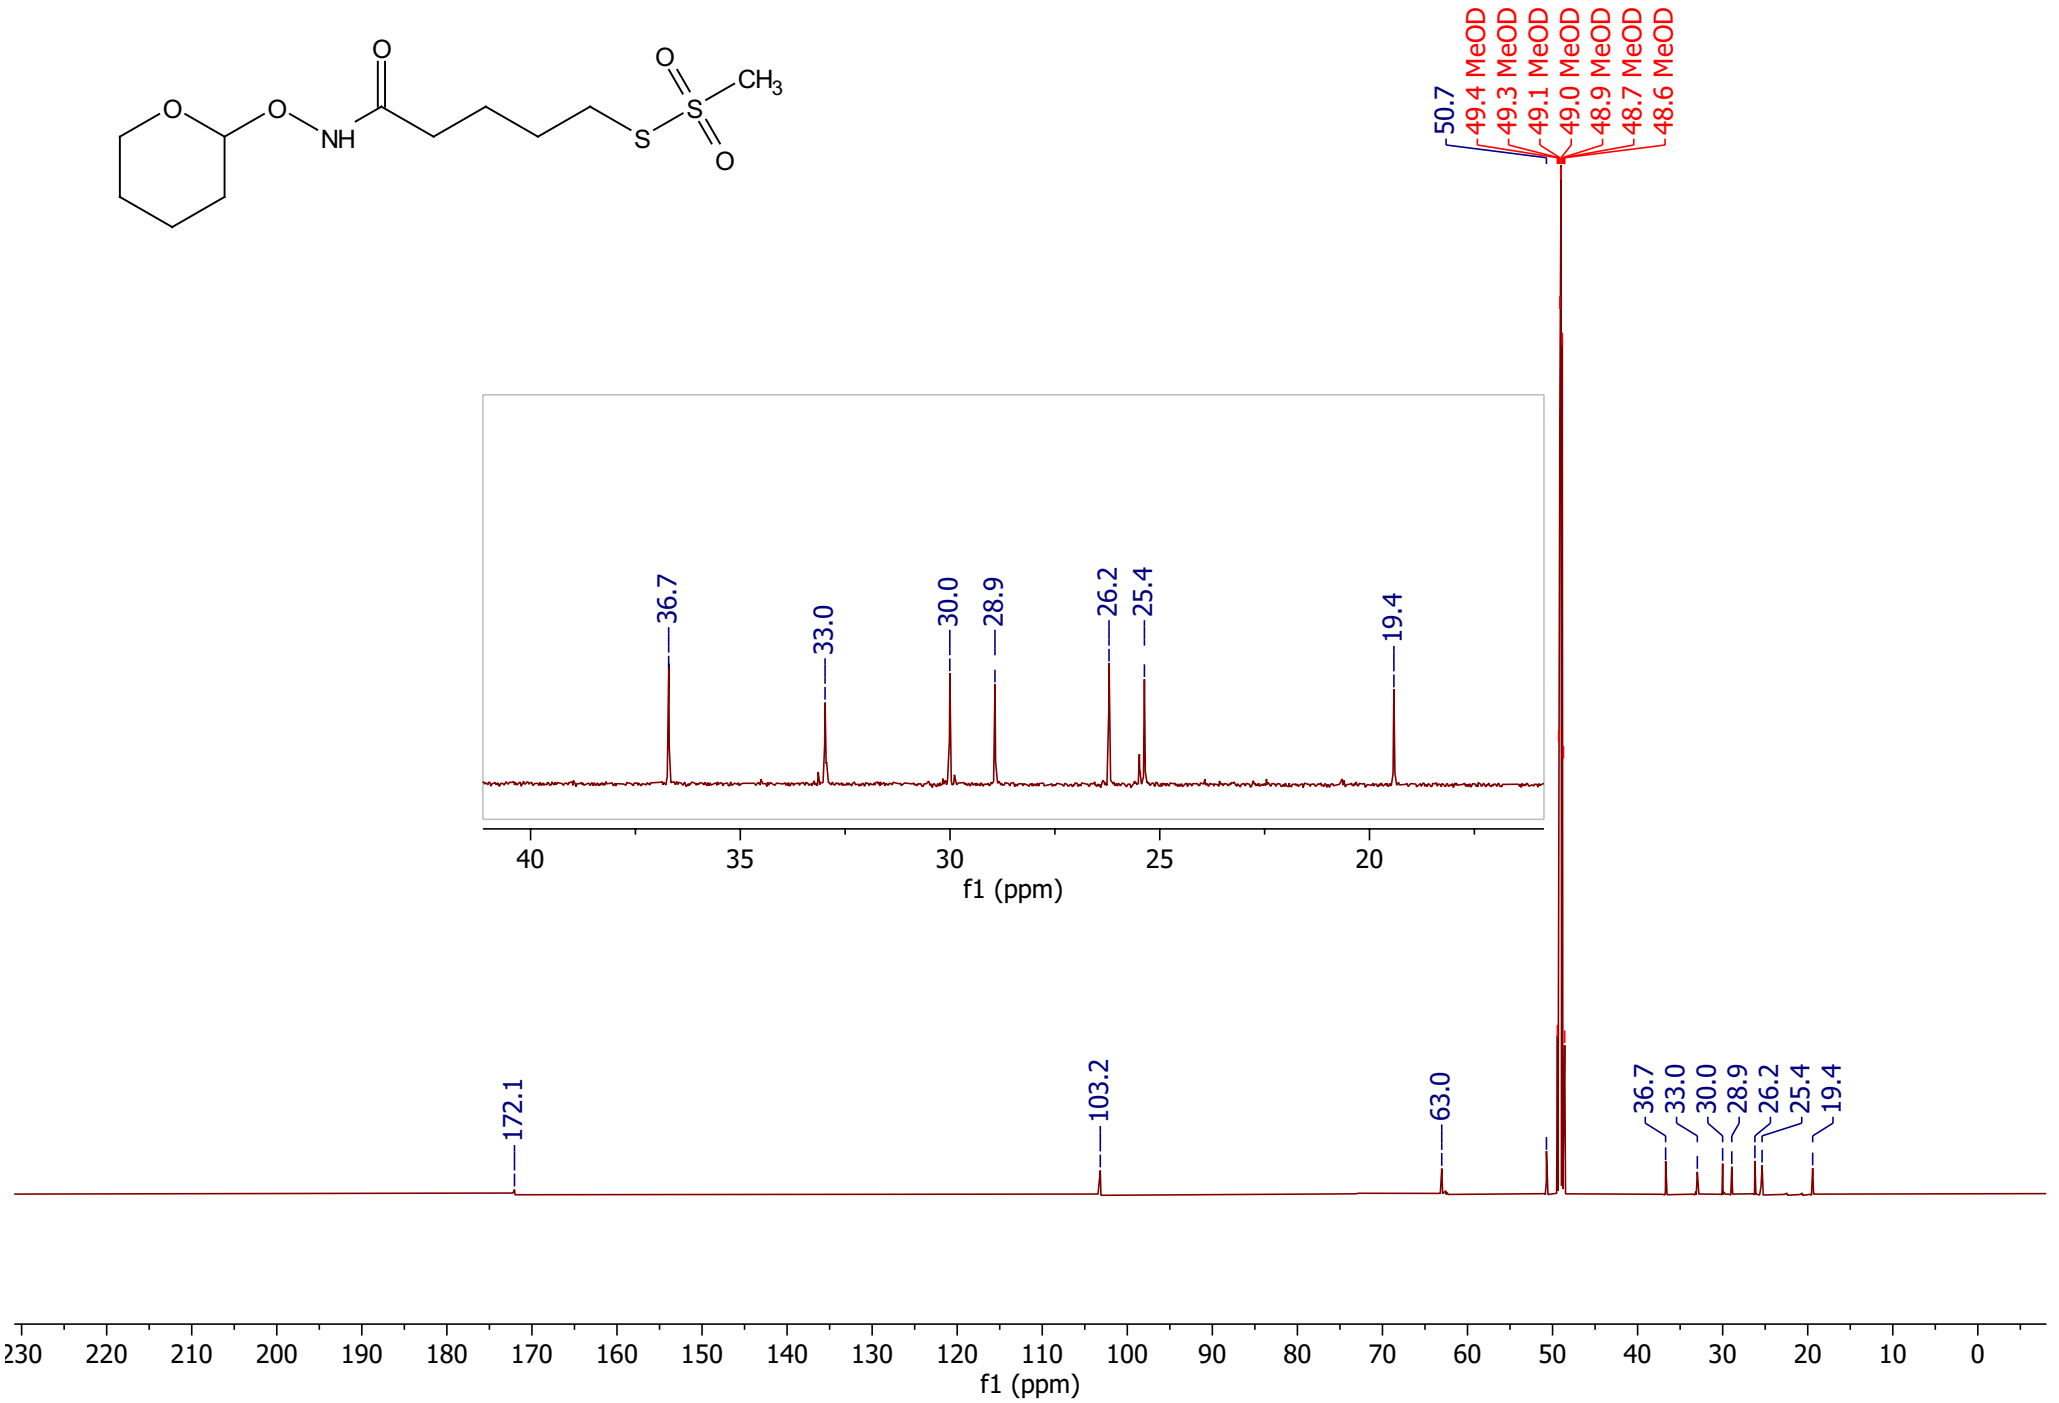

Compound 17  
<sup>1</sup>H NMR (400 MHz, MeOD-d4)

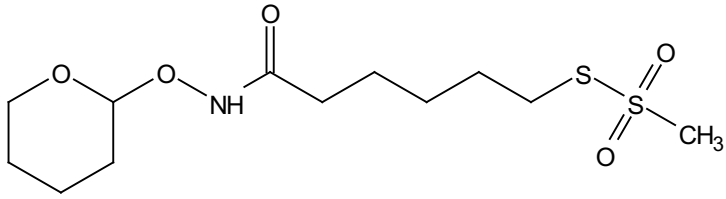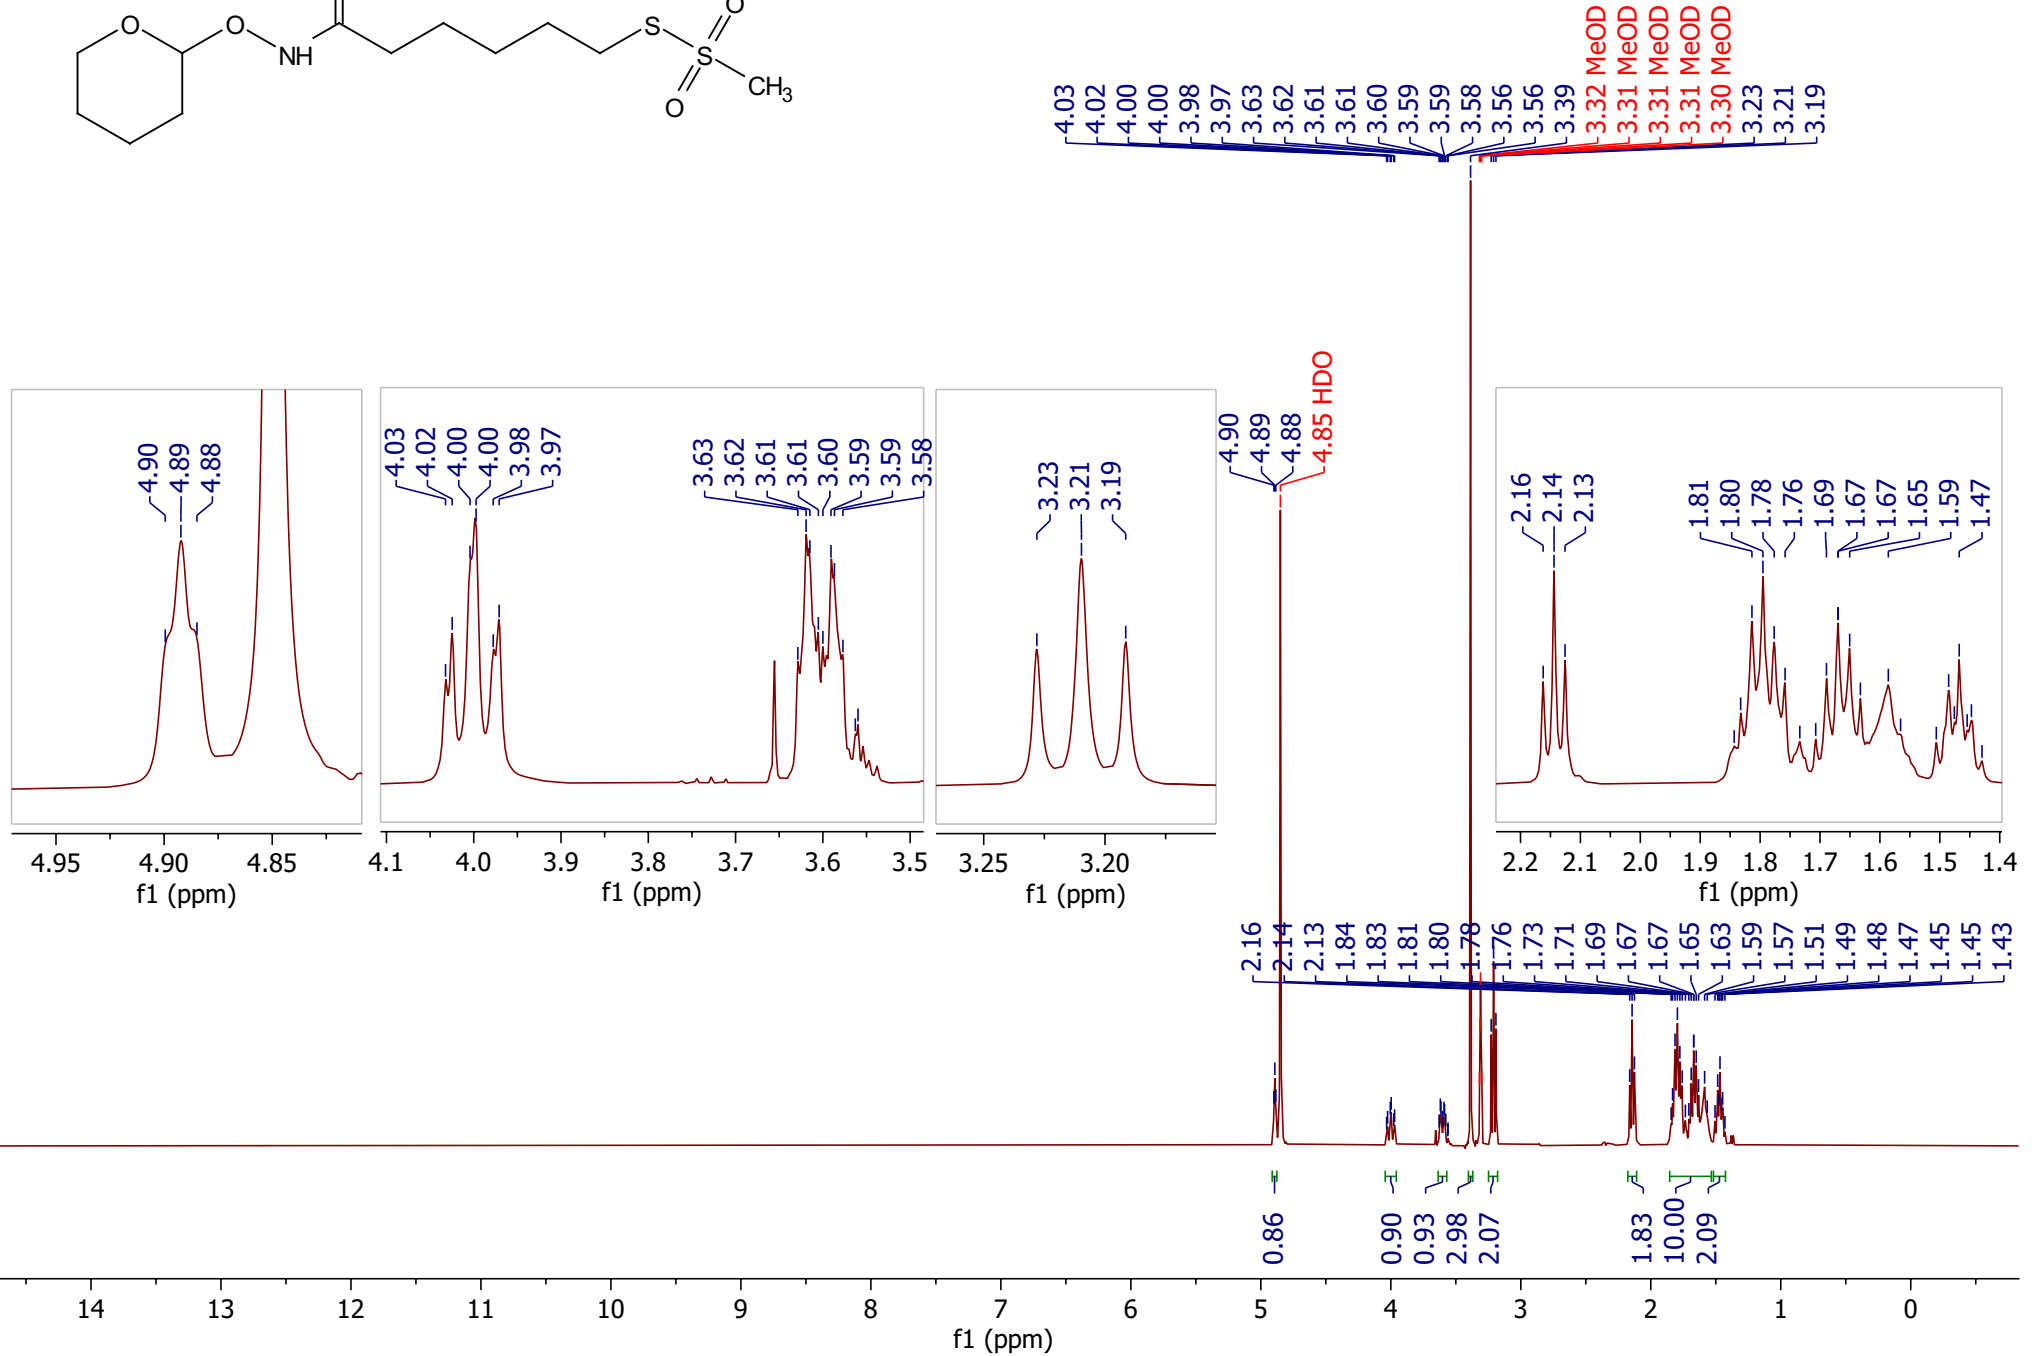

Compound 17  
<sup>1</sup>H NMR (151 MHz, MeOD-d4)

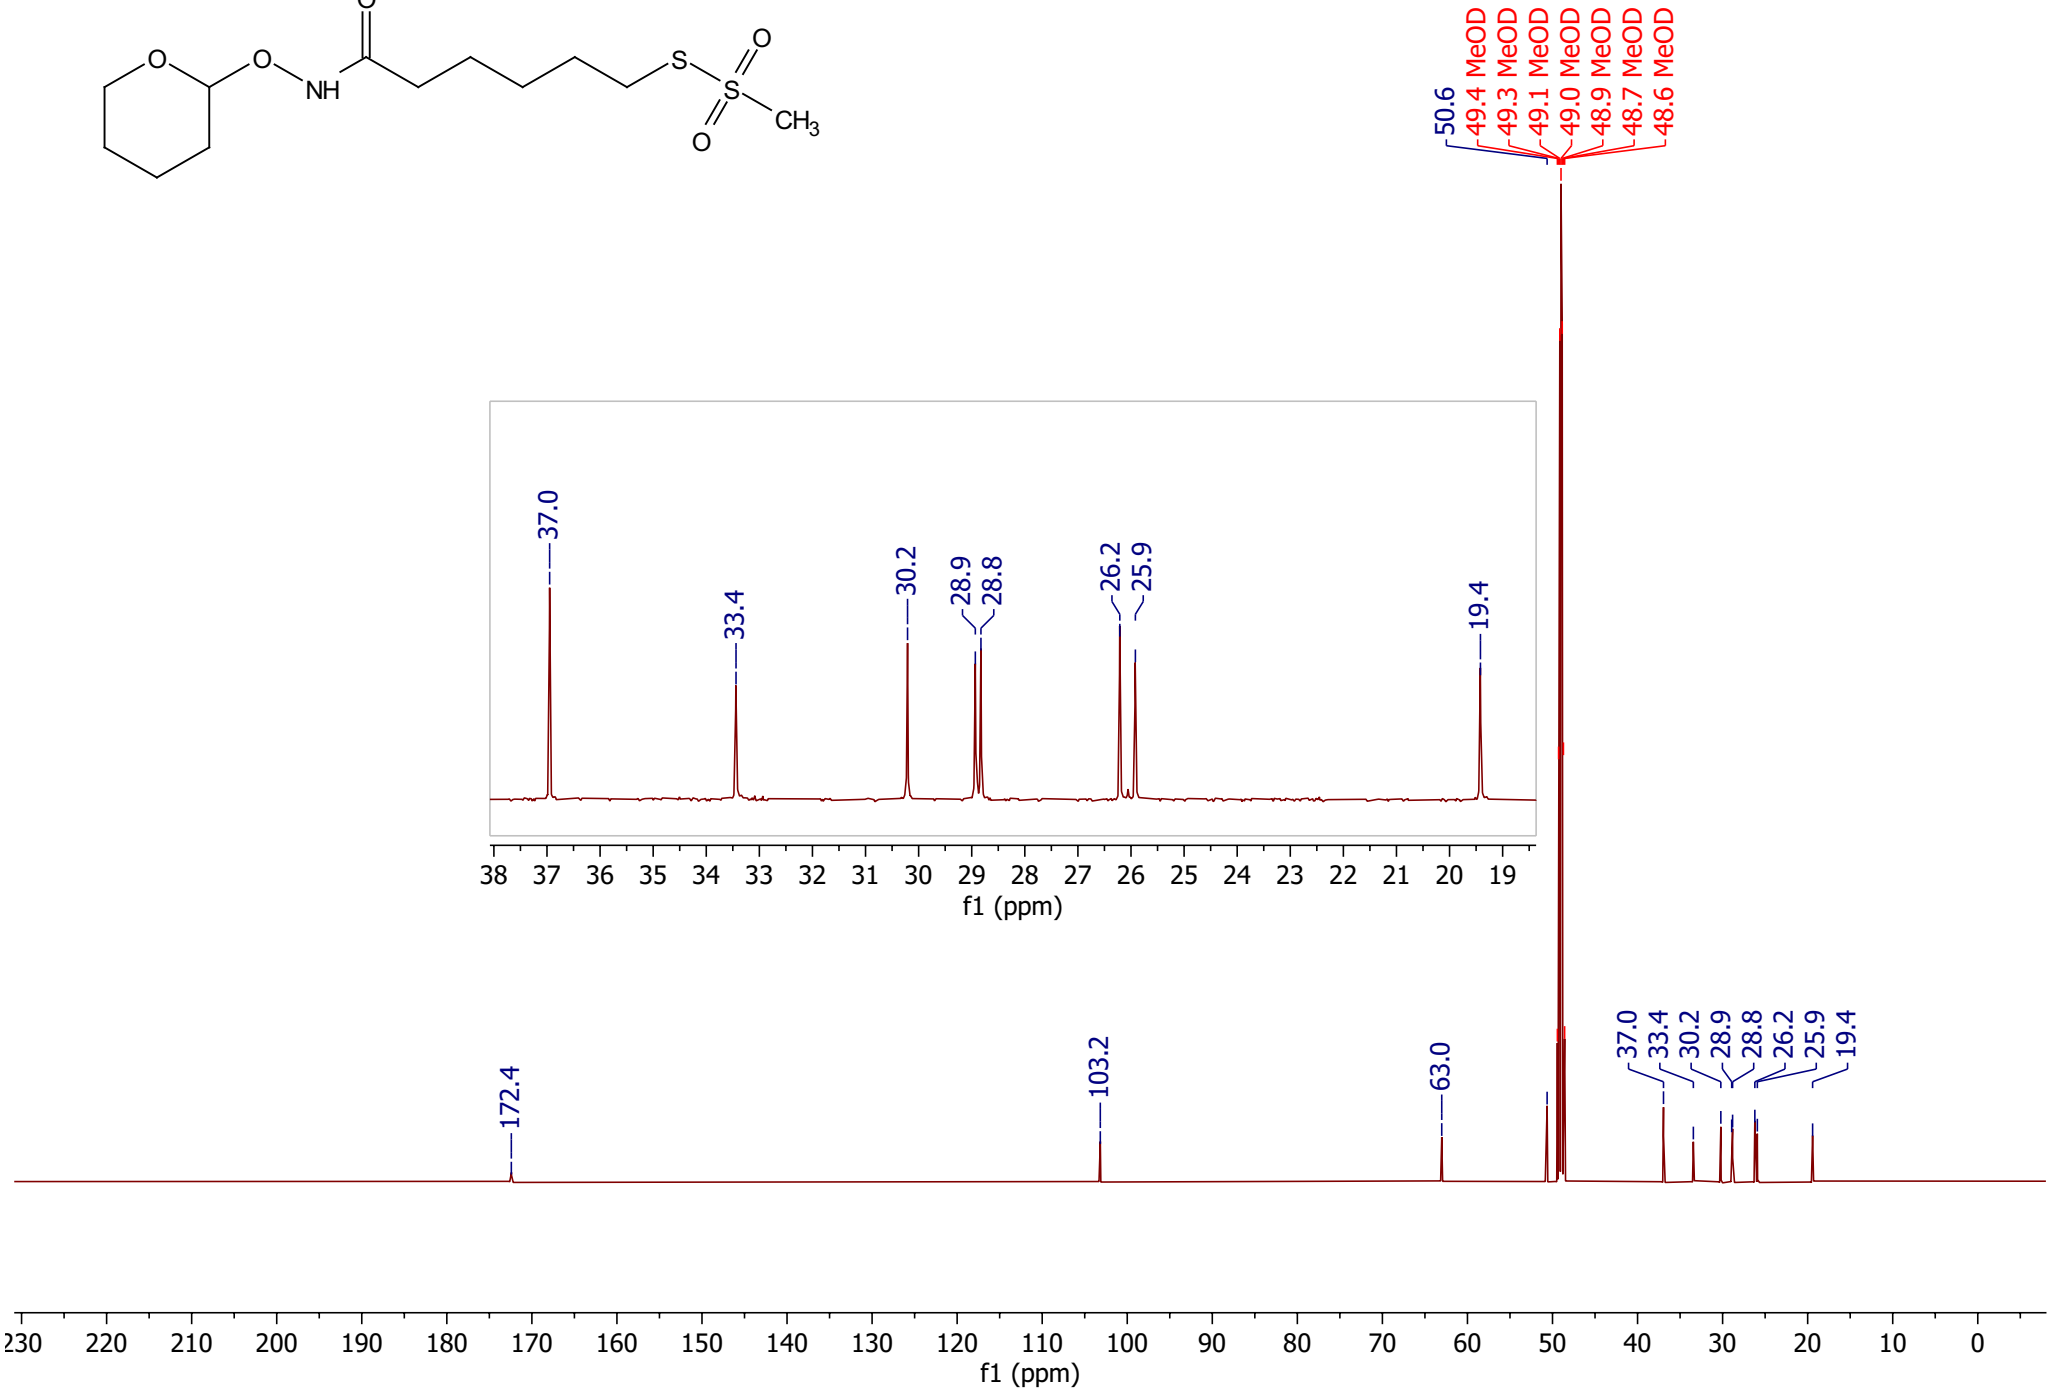

Compound 18  
<sup>1</sup>H NMR (500 MHz, MeOD-d4)

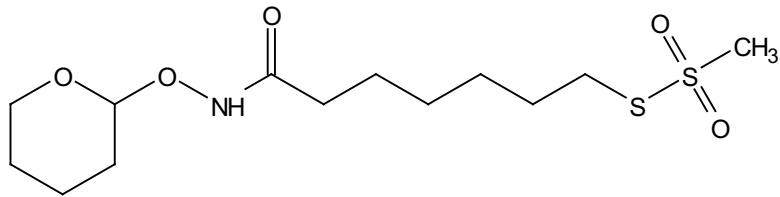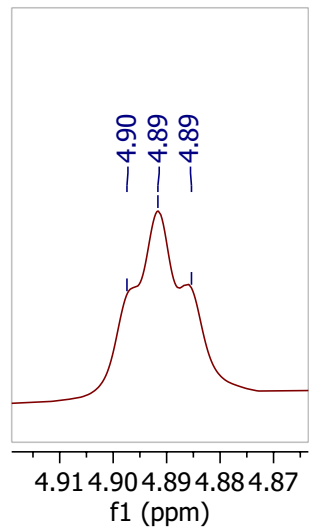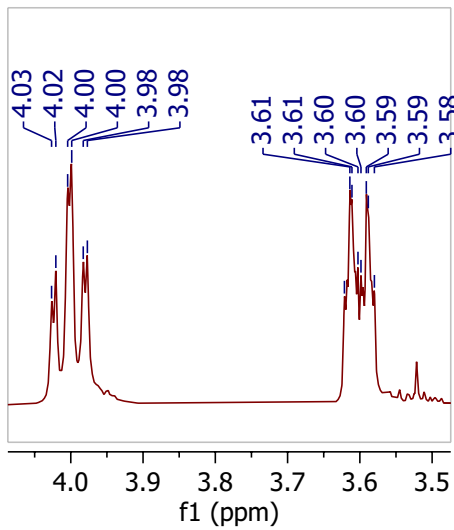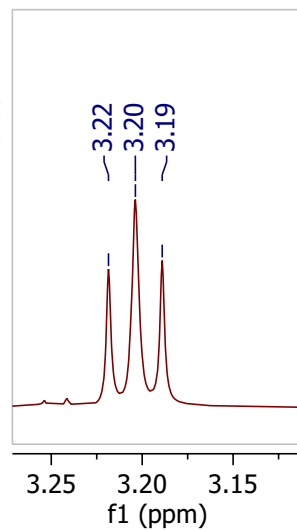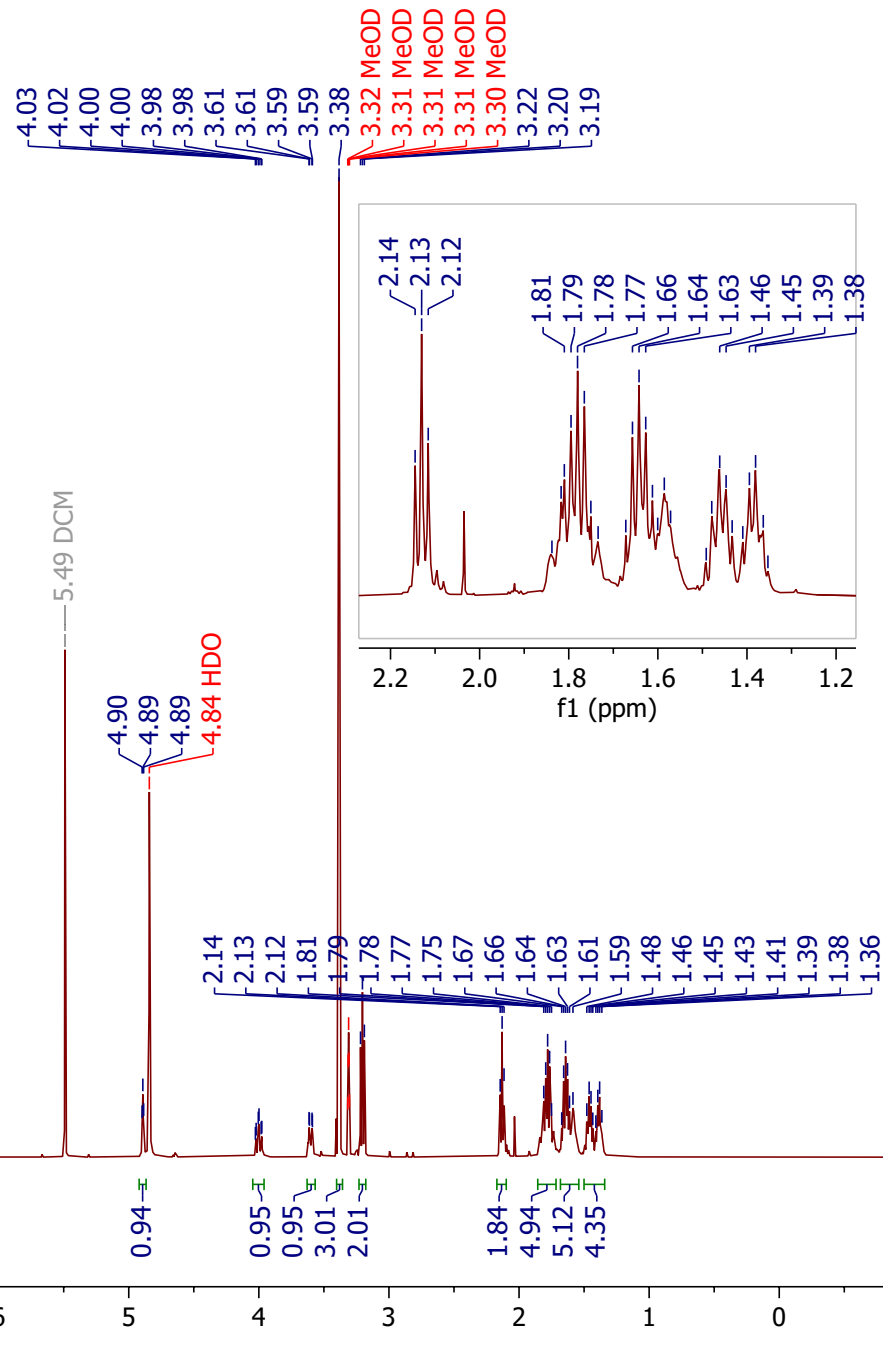

Compound 18  
<sup>1</sup>H NMR (126 MHz, MeOD-d4)

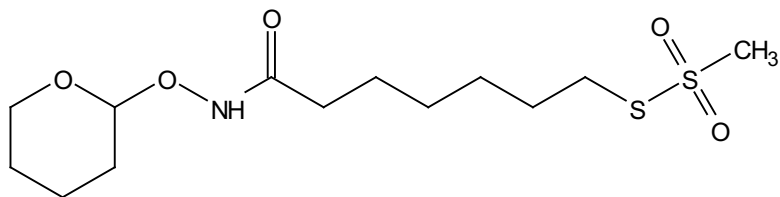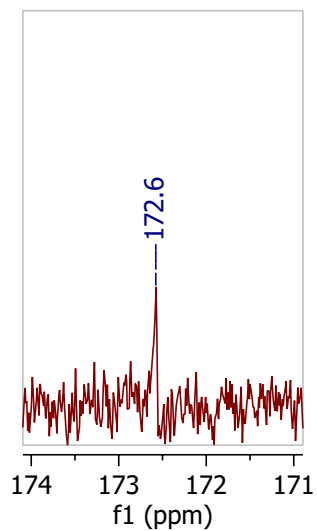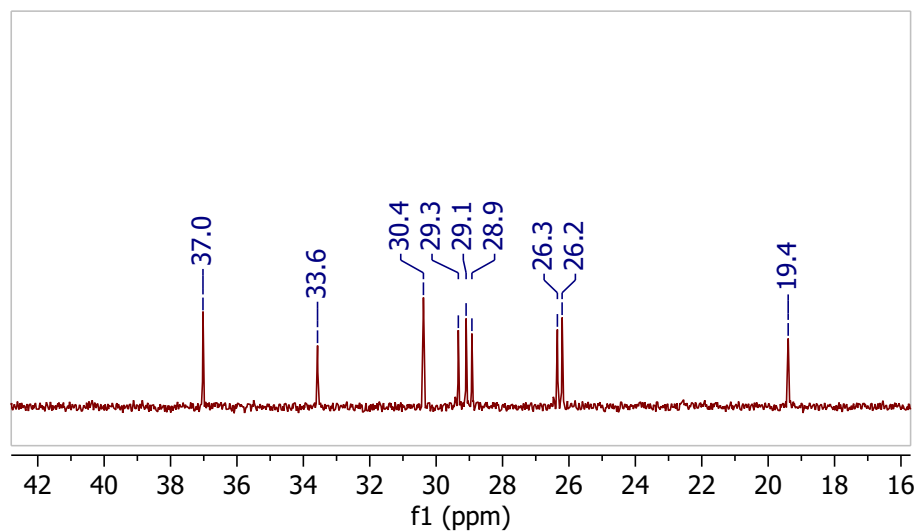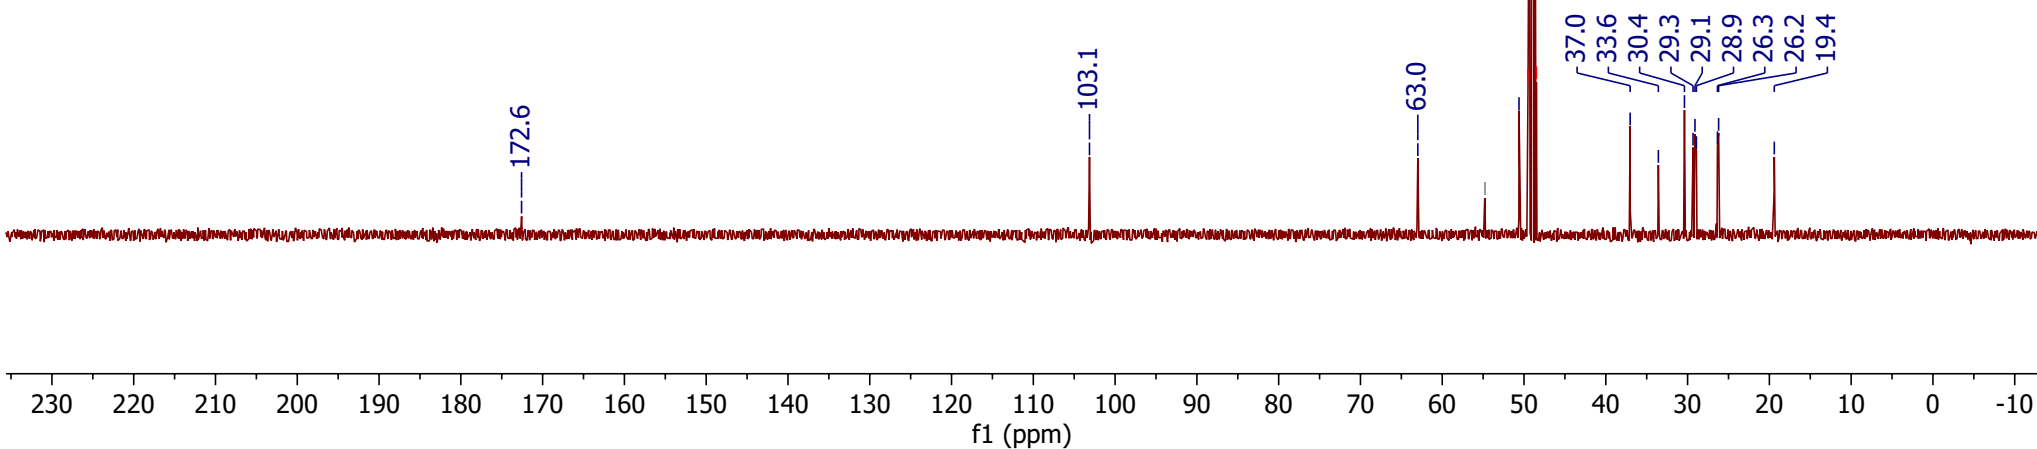

54.8 DCM  
50.6  
49.5 MeOD  
49.3 MeOD  
49.2 MeOD  
49.0 MeOD  
48.8 MeOD  
48.7 MeOD  
48.5 MeOD

Compound 19  
<sup>1</sup>H NMR (500 MHz, MeOD-d4)

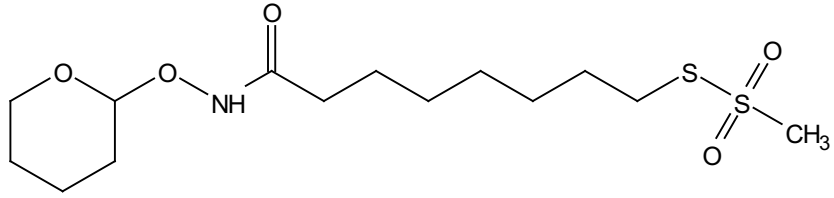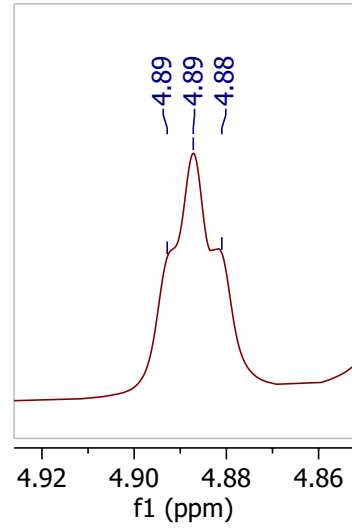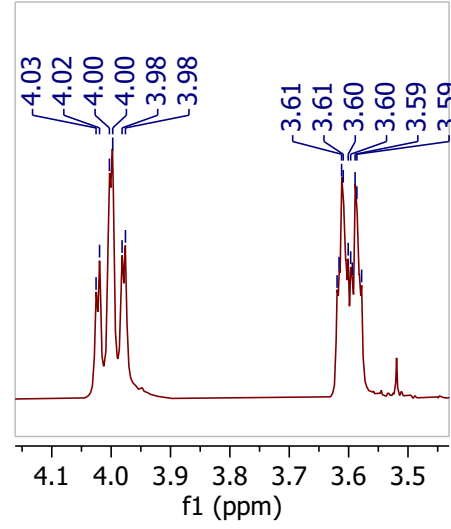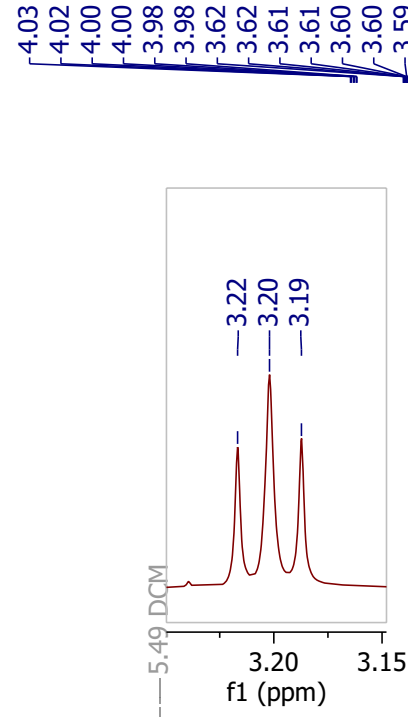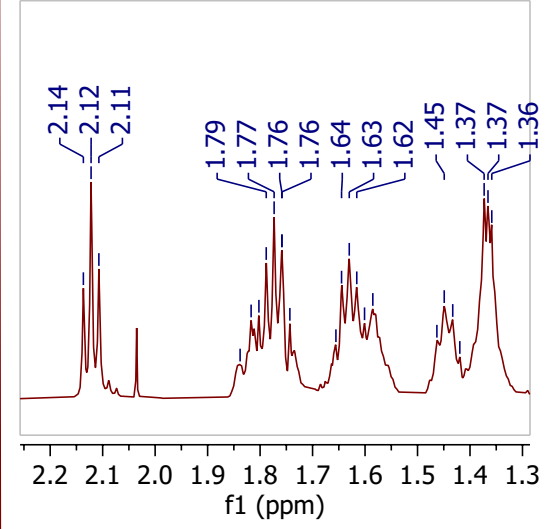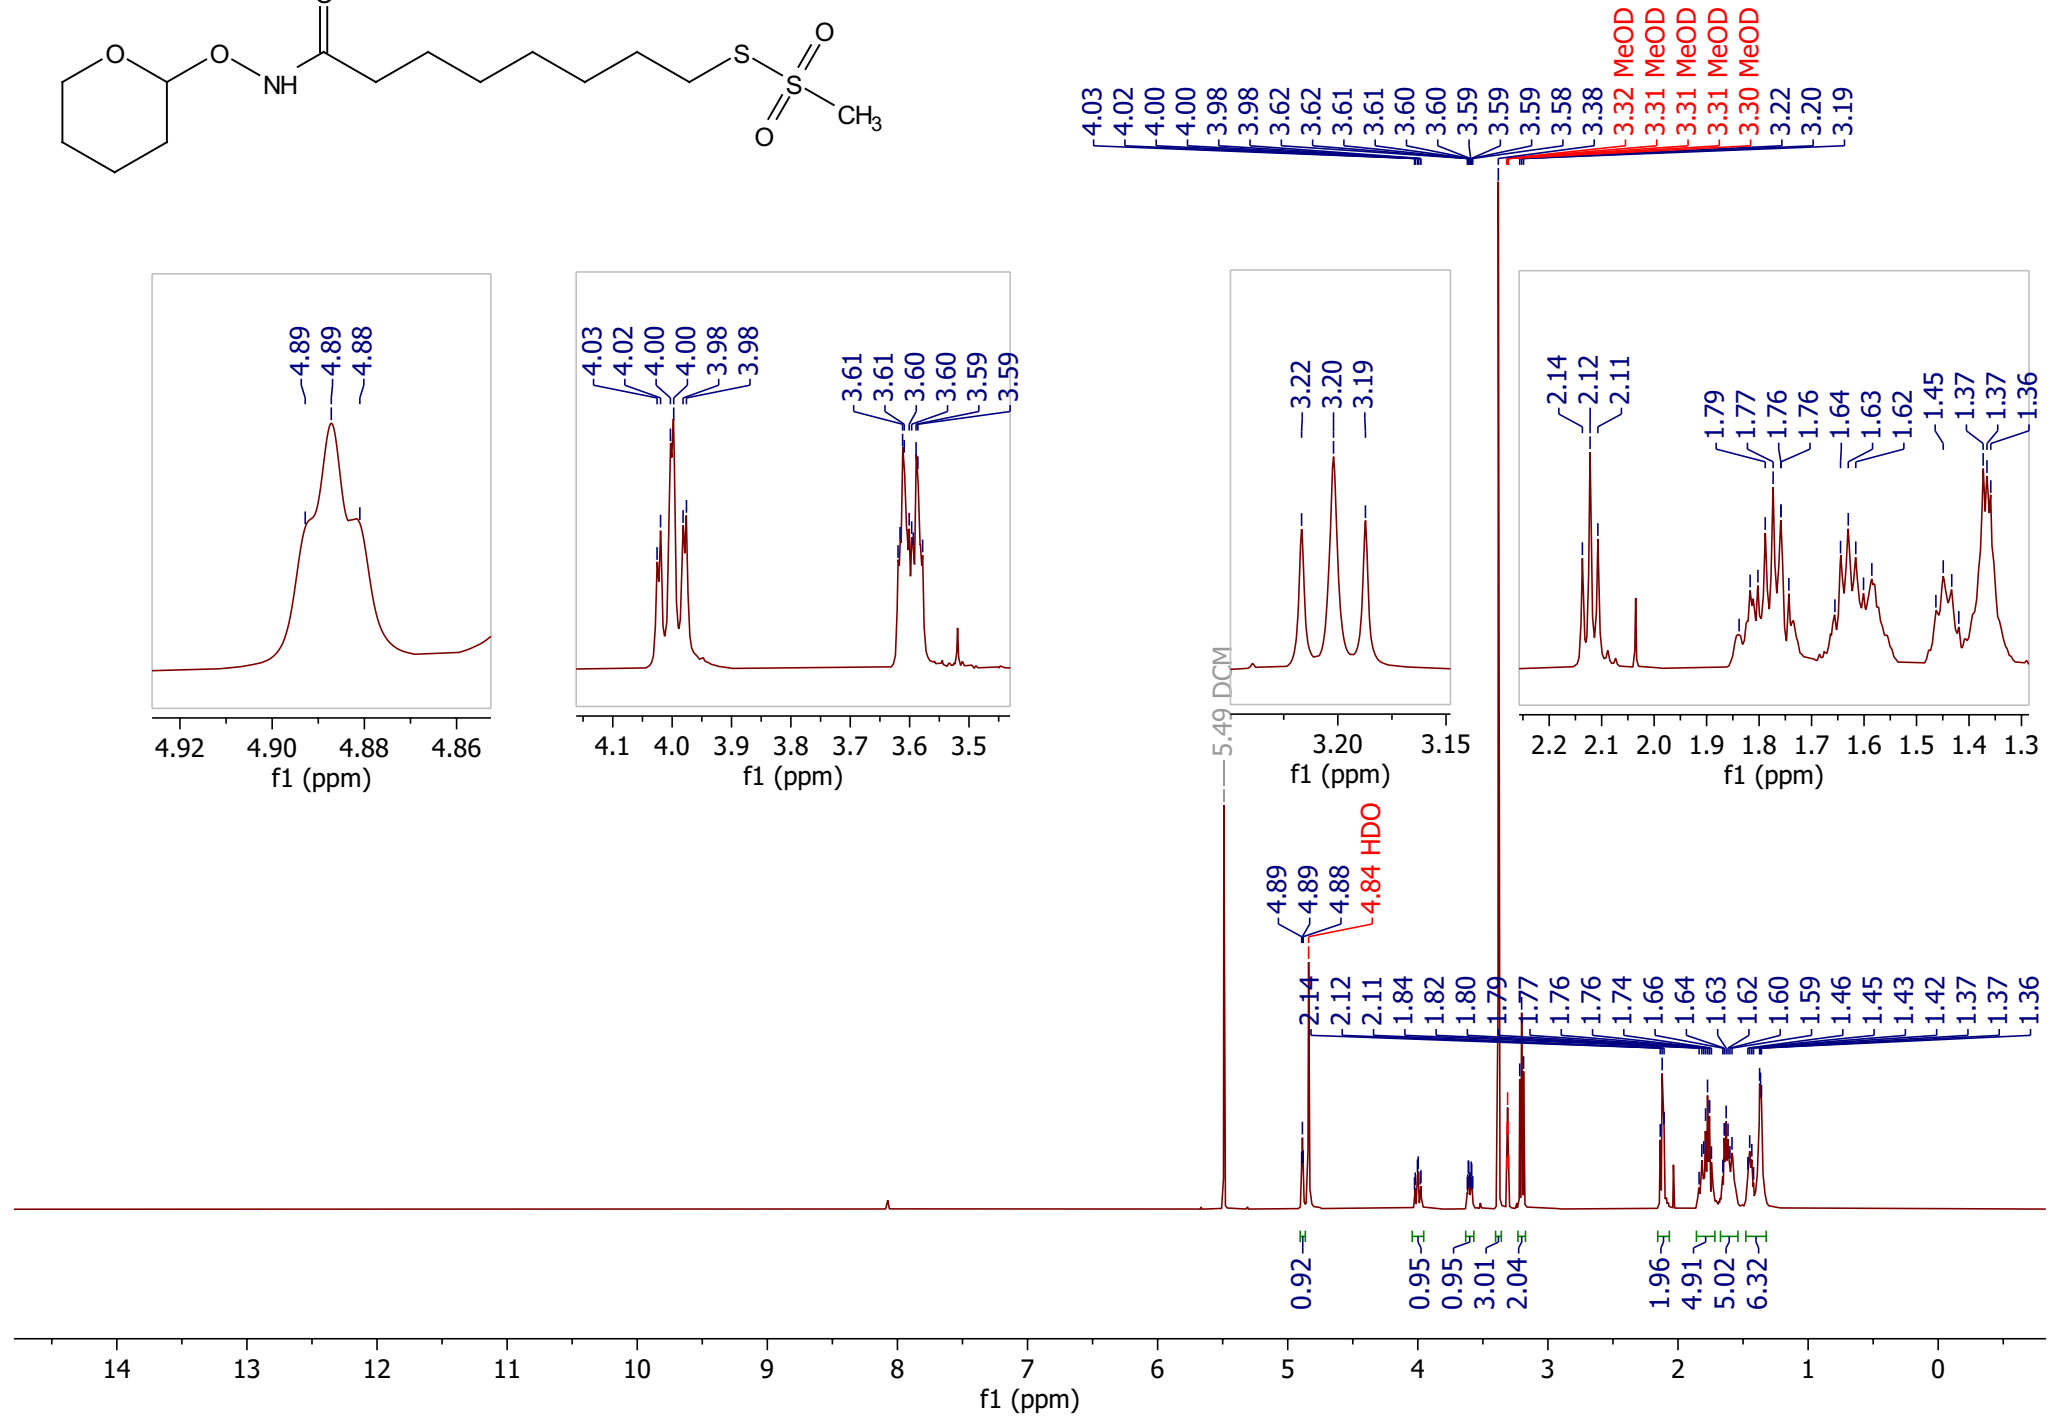



**Compound 19**  
**<sup>1</sup>H NMR (126 MHz, MeOD-d4)**

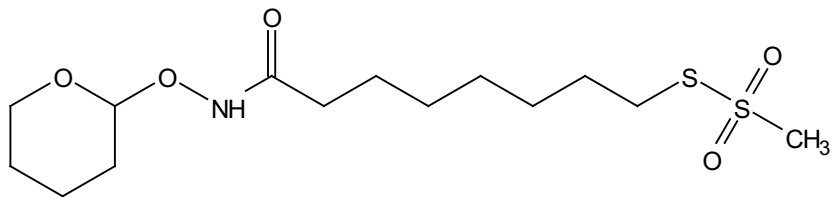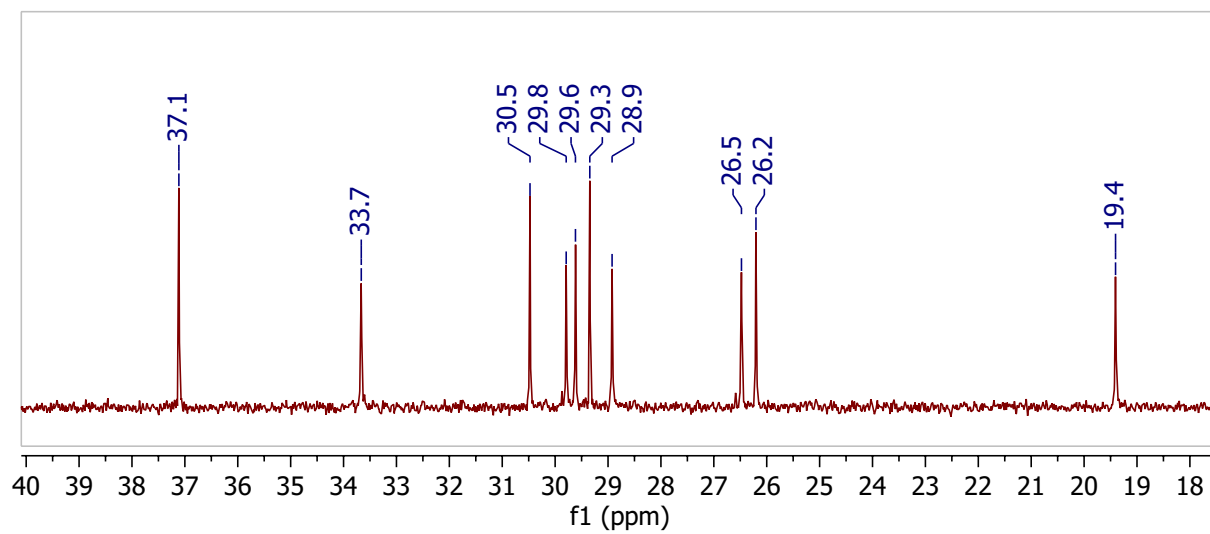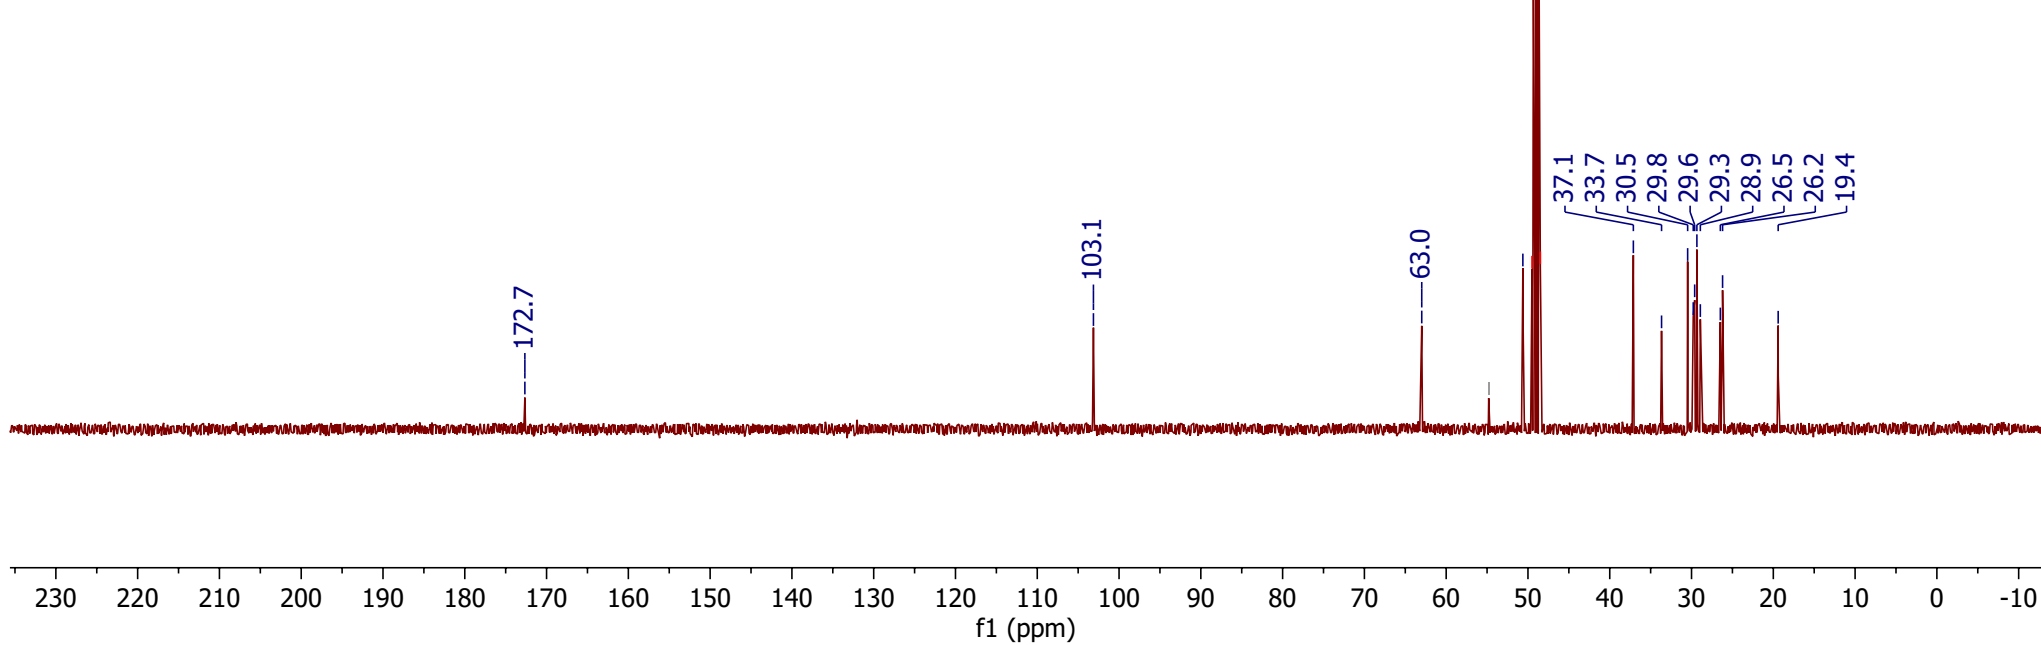

54.8 DCM  
50.6  
49.5 MeOD  
49.3 MeOD  
49.2 MeOD  
49.0 MeOD  
48.8 MeOD  
48.7 MeOD  
48.5 MeOD

Compound 20  
<sup>1</sup>H NMR (600 MHz, MeOD-d4)

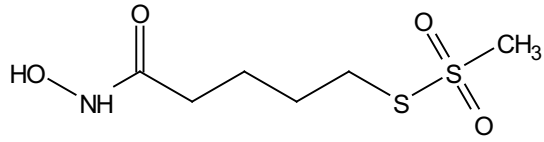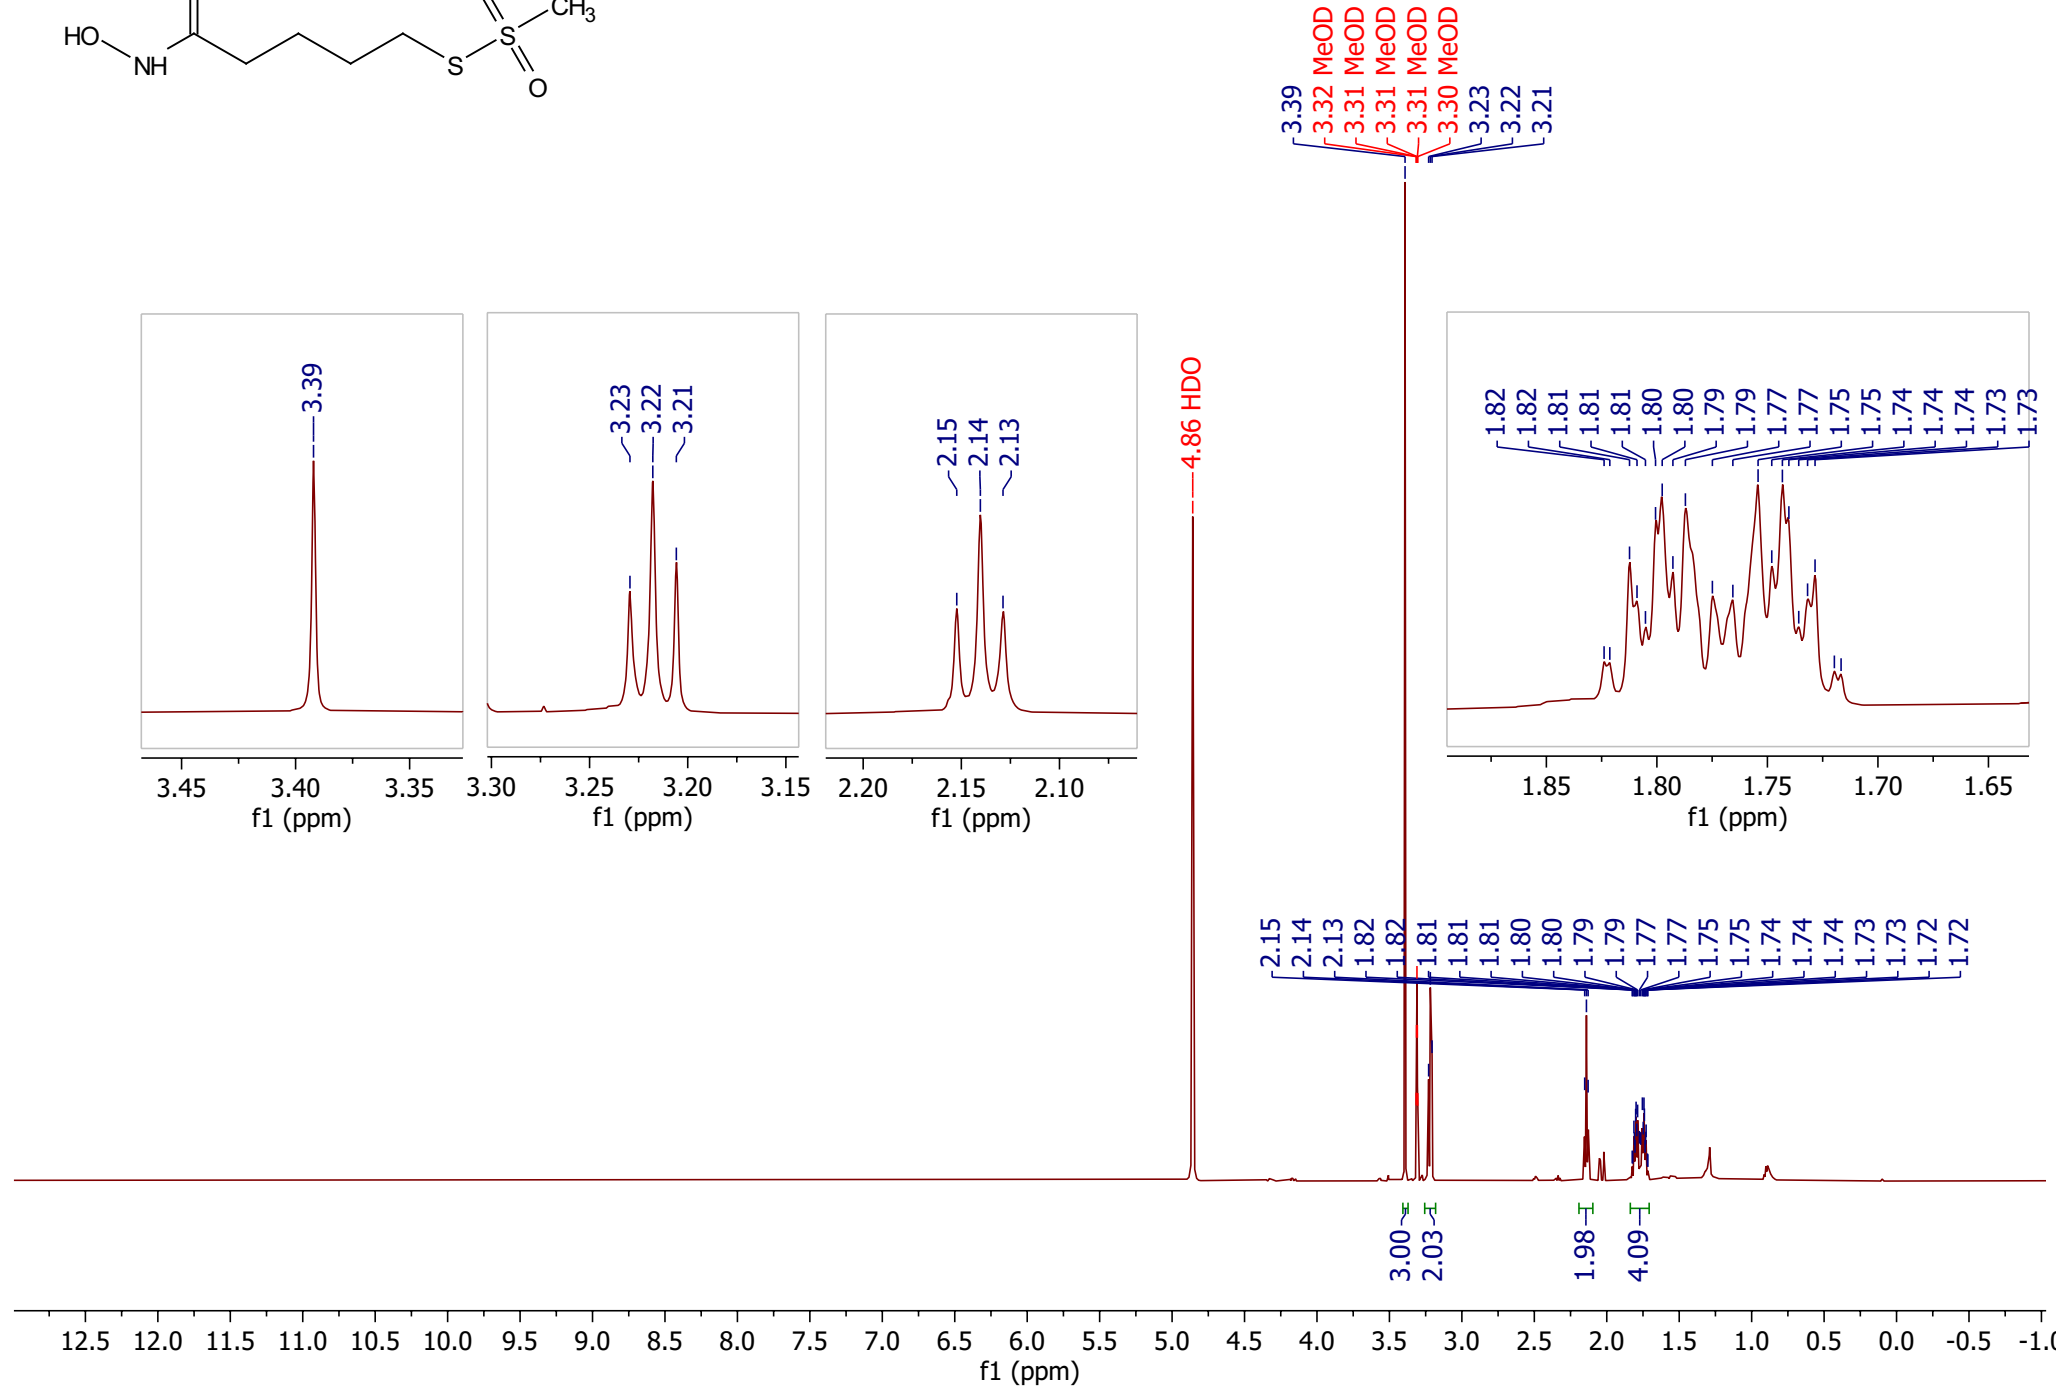

Compound 20  
<sup>1</sup>H NMR (151 MHz, MeOD-d4)

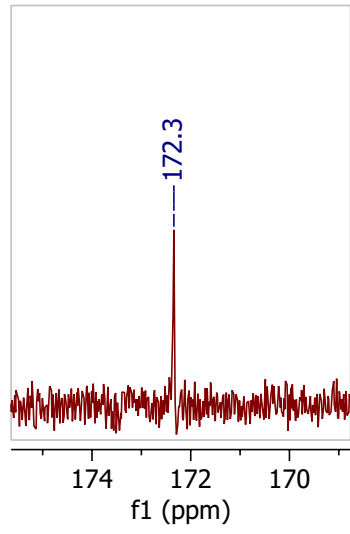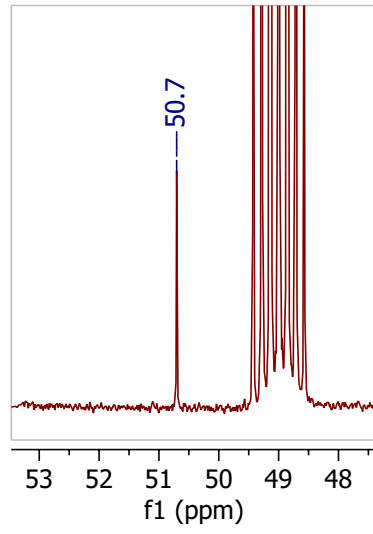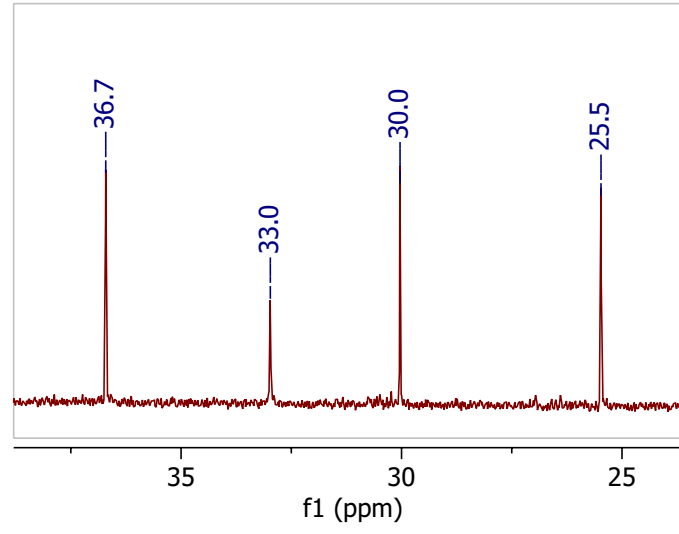

50.7  
49.4 MeOD  
49.3 MeOD  
49.1 MeOD  
49.0 MeOD  
48.9 MeOD  
48.7 MeOD  
48.6 MeOD

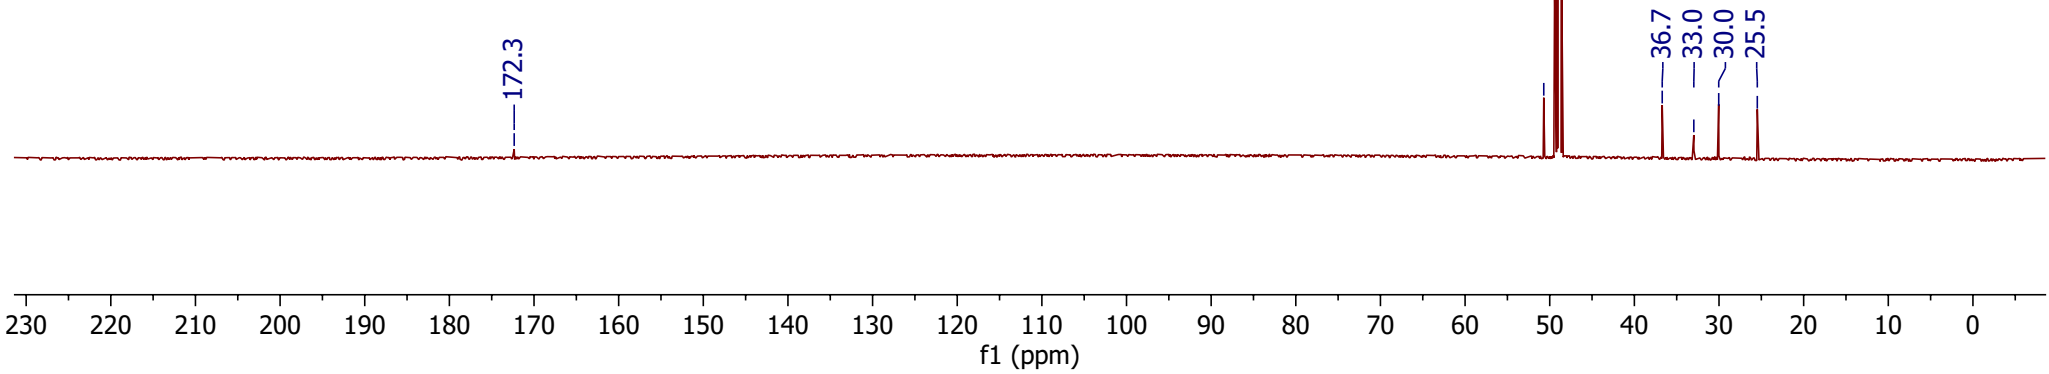

Compound 21  
<sup>1</sup>H NMR (600 MHz, MeOD-d4)

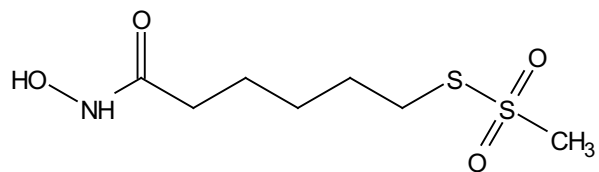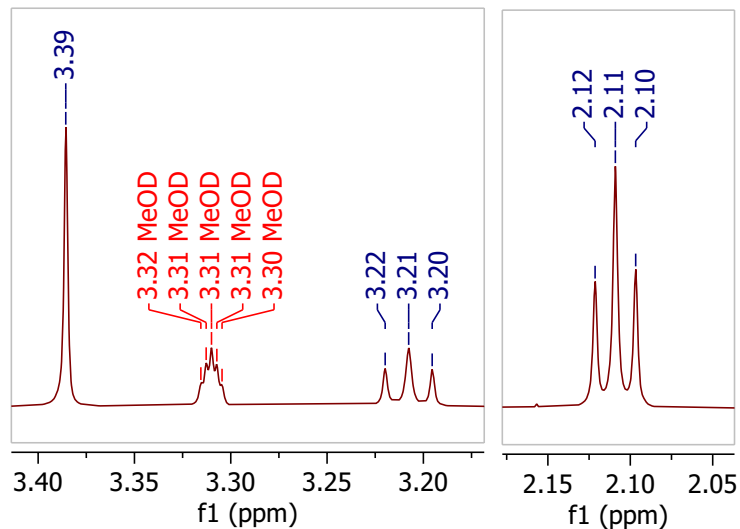

4.86 HDO

3.39  
3.32 MeOD  
3.31 MeOD  
3.31 MeOD  
3.31 MeOD  
3.30 MeOD  
3.22  
3.21  
3.20

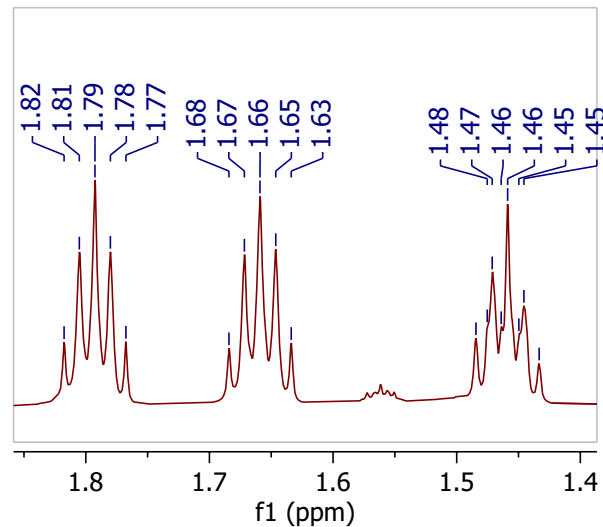

2.12  
2.11  
2.10  
1.82  
1.81  
1.79  
1.78  
1.77  
1.68  
1.67  
1.66  
1.65  
1.63  
1.48  
1.47  
1.46  
1.46  
1.45  
1.45  
1.43

3.00  
2.01

1.86  
2.04  
2.03  
2.01

12.5 12.0 11.5 11.0 10.5 10.0 9.5 9.0 8.5 8.0 7.5 7.0 6.5 6.0 5.5 5.0 4.5 4.0 3.5 3.0 2.5 2.0 1.5 1.0 0.5 0.0 -0.5 -1.0  
f1 (ppm)

Compound 21  
<sup>1</sup>H NMR (151 MHz, MeOD-d4)

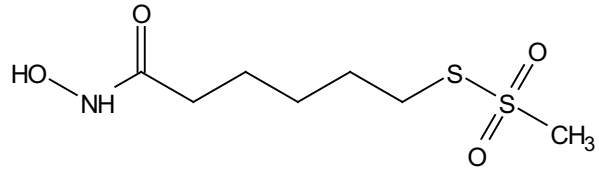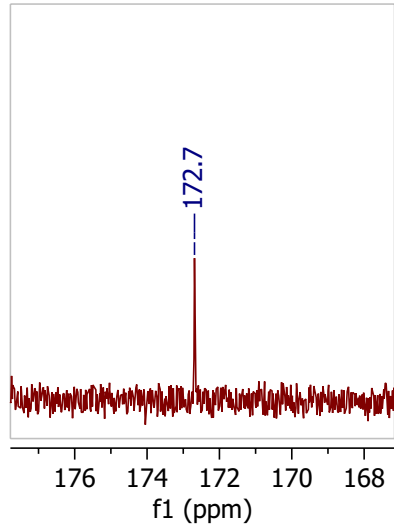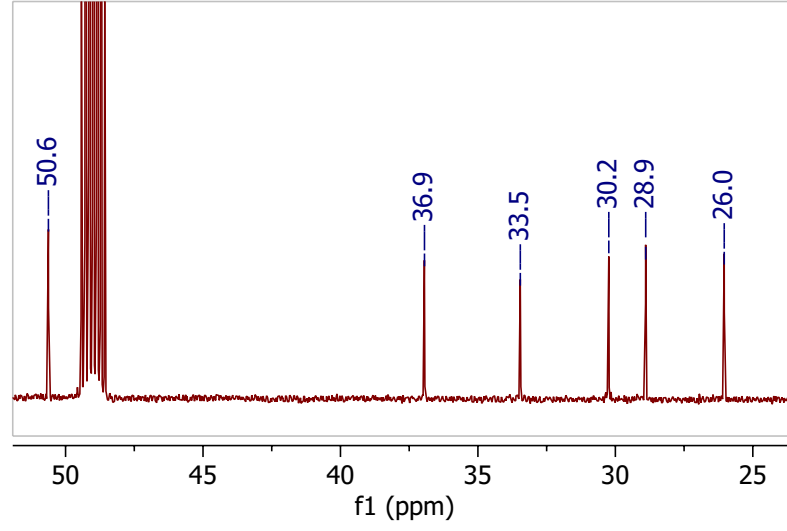

50.6  
49.4 MeOD  
49.3 MeOD  
49.1 MeOD  
48.9 MeOD  
48.7 MeOD  
48.6 MeOD

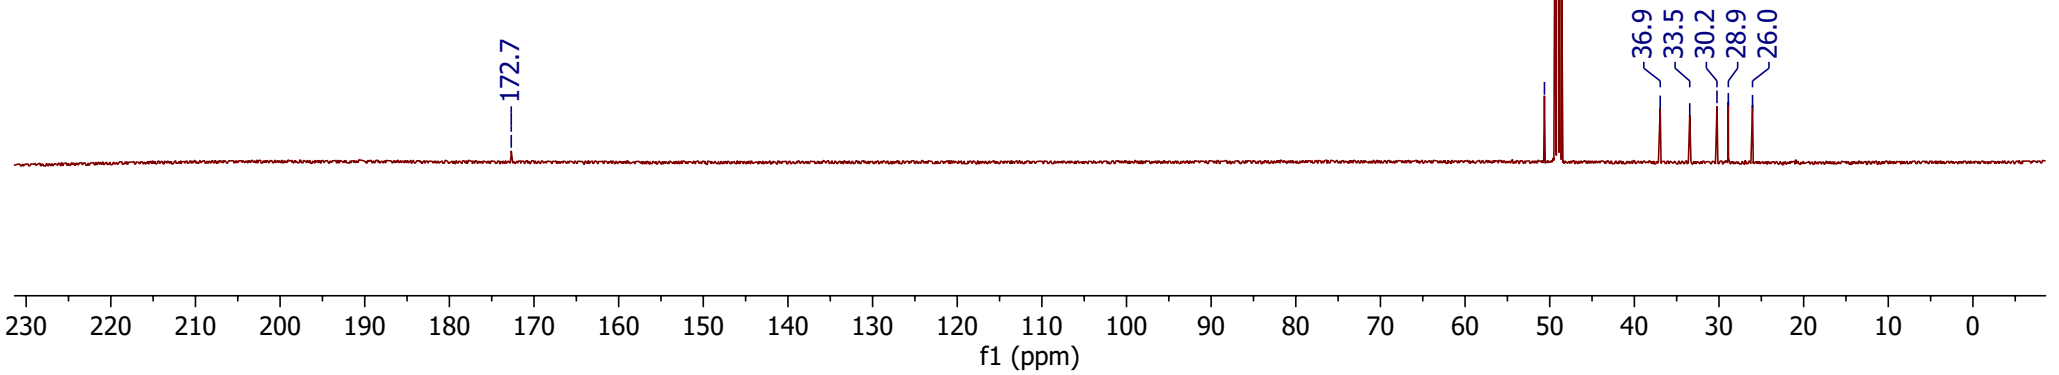

Compound 22  
<sup>1</sup>H NMR (600 MHz, MeOD-d4)

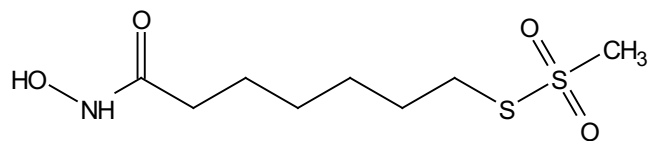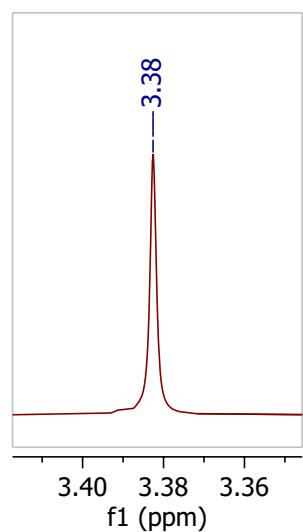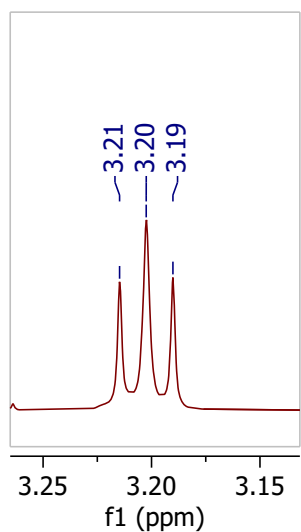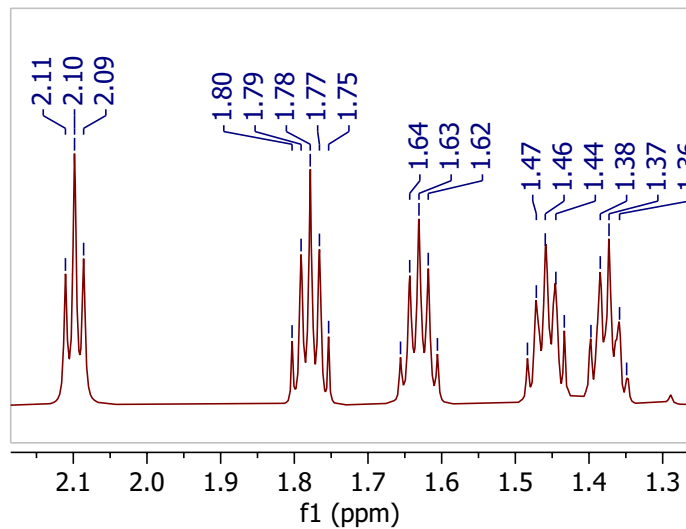

3.38  
3.32 MeOD  
3.31 MeOD  
3.31 MeOD  
3.31 MeOD  
3.30 MeOD  
3.21  
3.20  
3.19

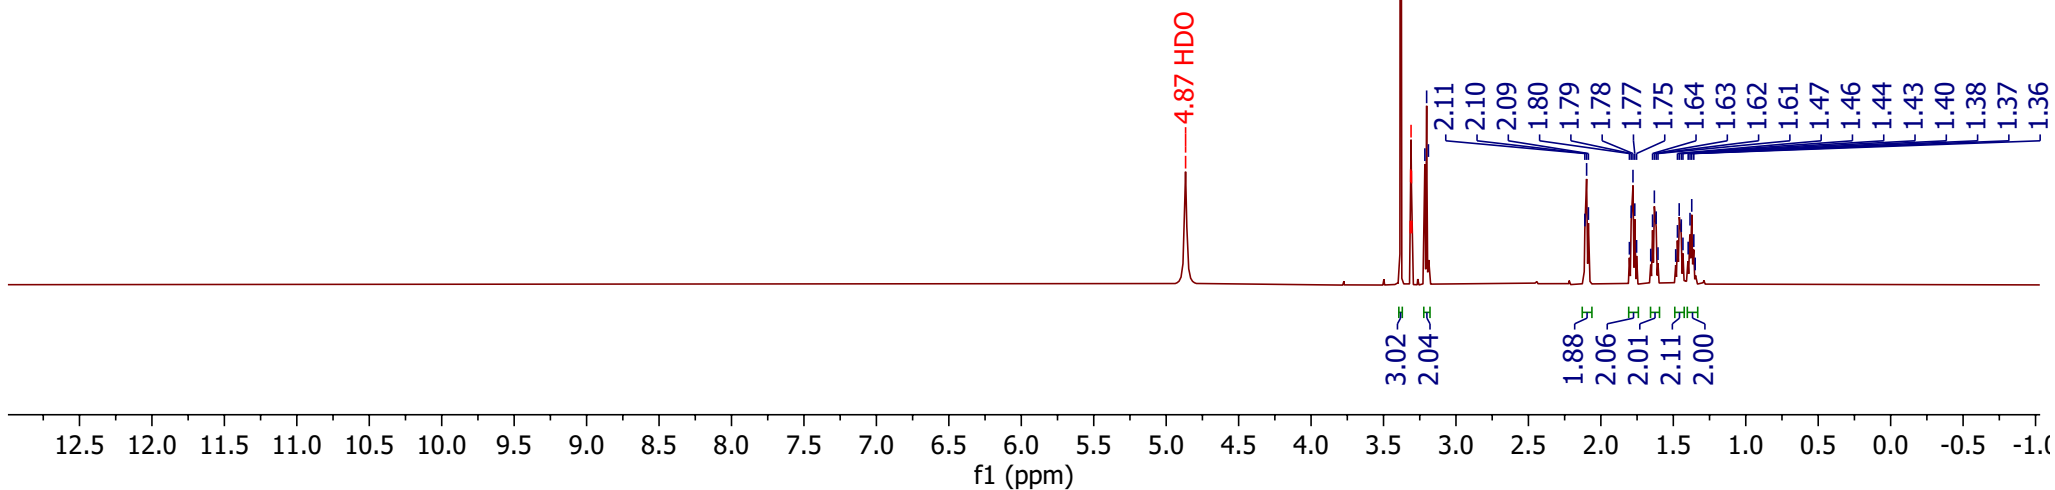

Compound 22  
<sup>1</sup>H NMR (151 MHz, MeOD-d4)

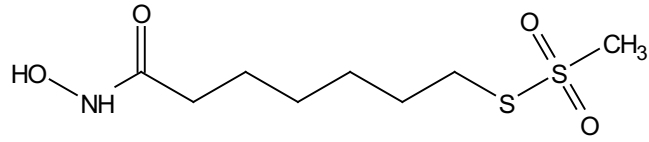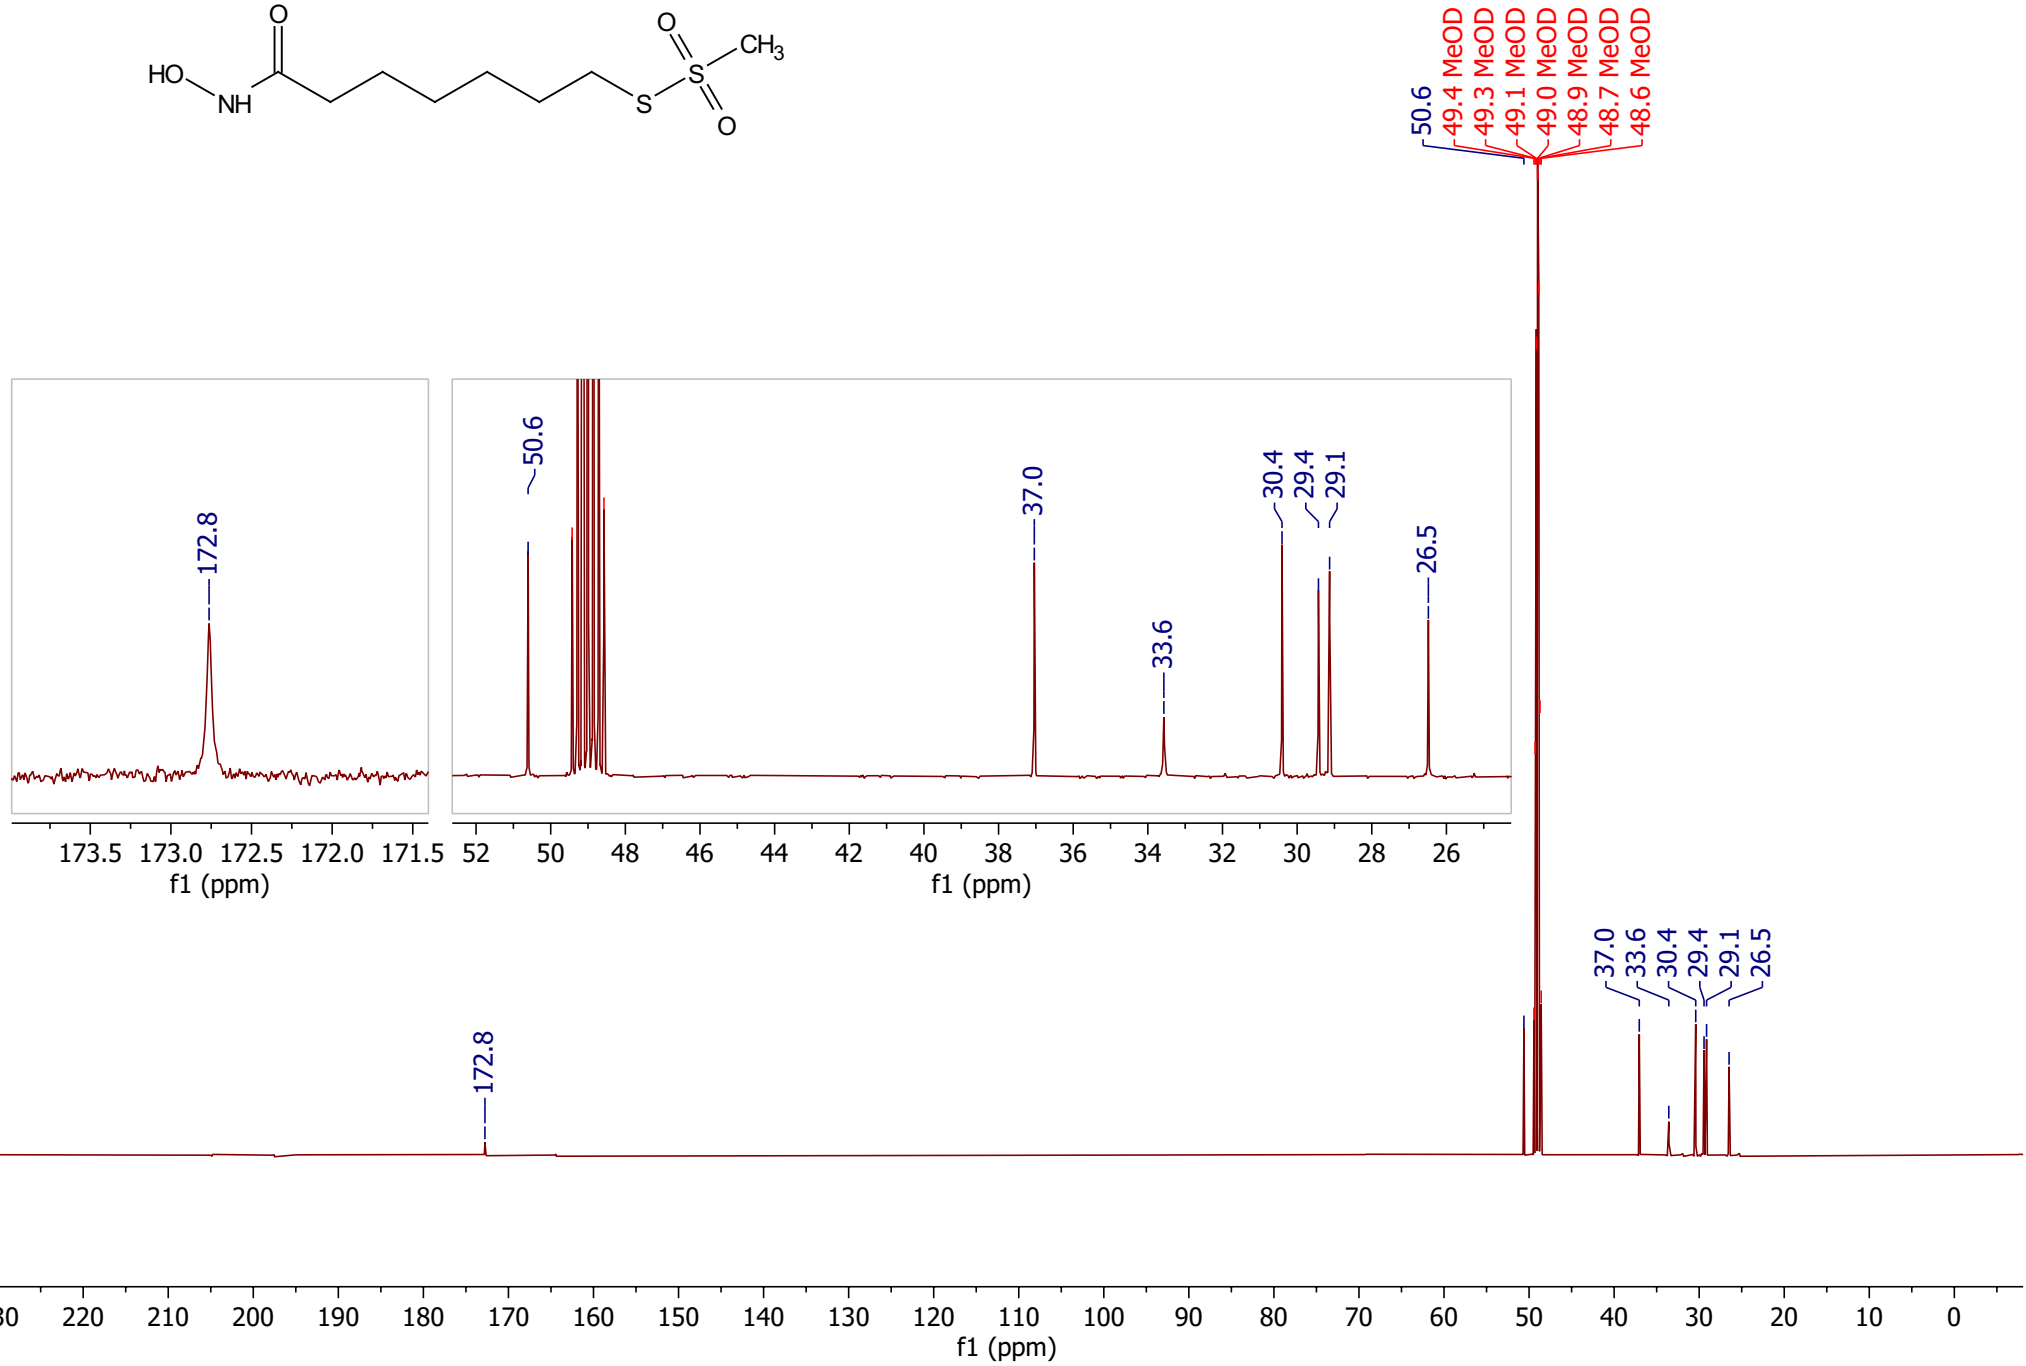

Compound 23  
<sup>1</sup>H NMR (600 MHz, MeOD-d4)

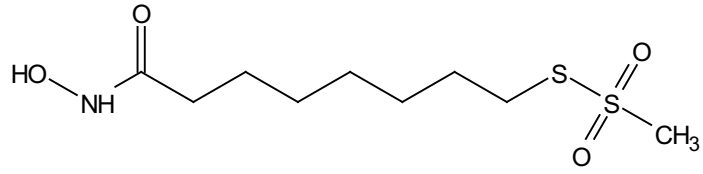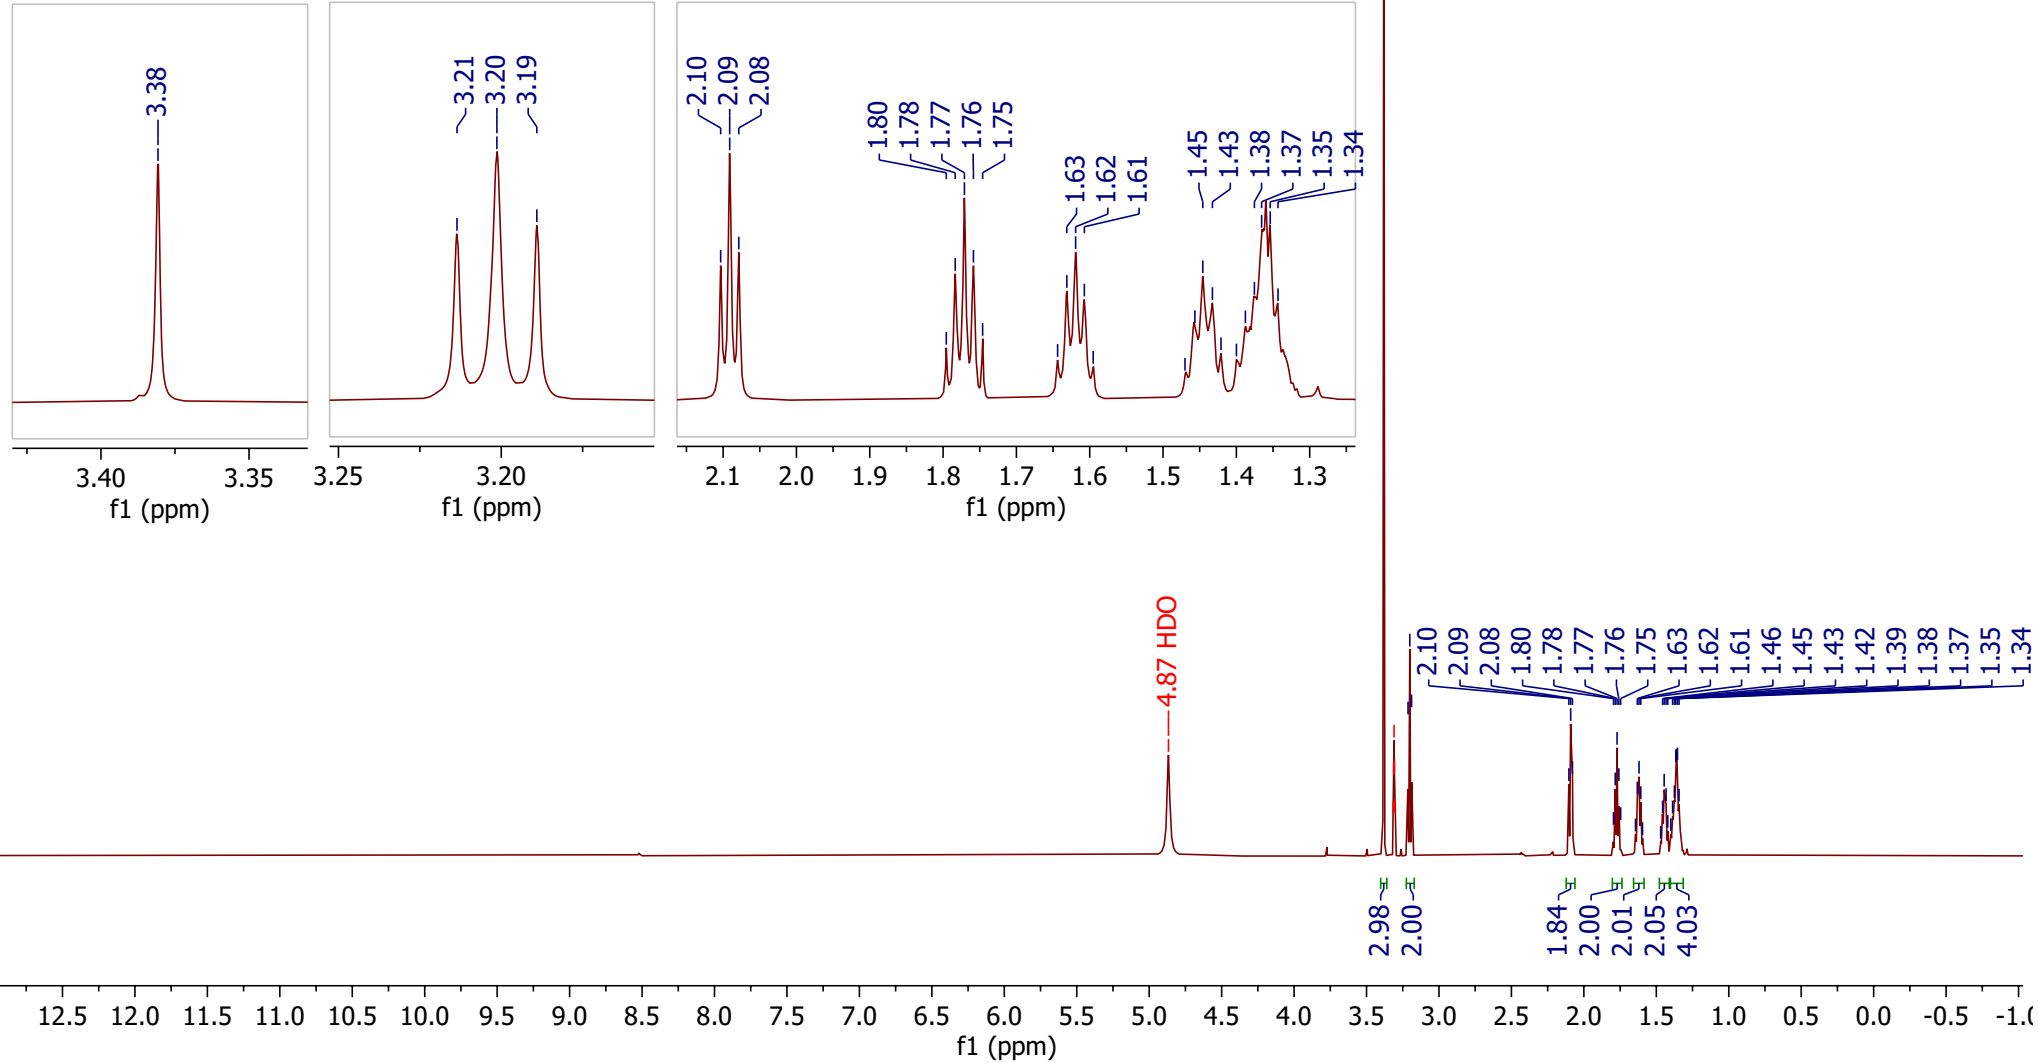



Compound 23  
<sup>1</sup>H NMR (151 MHz, MeOD-d4)

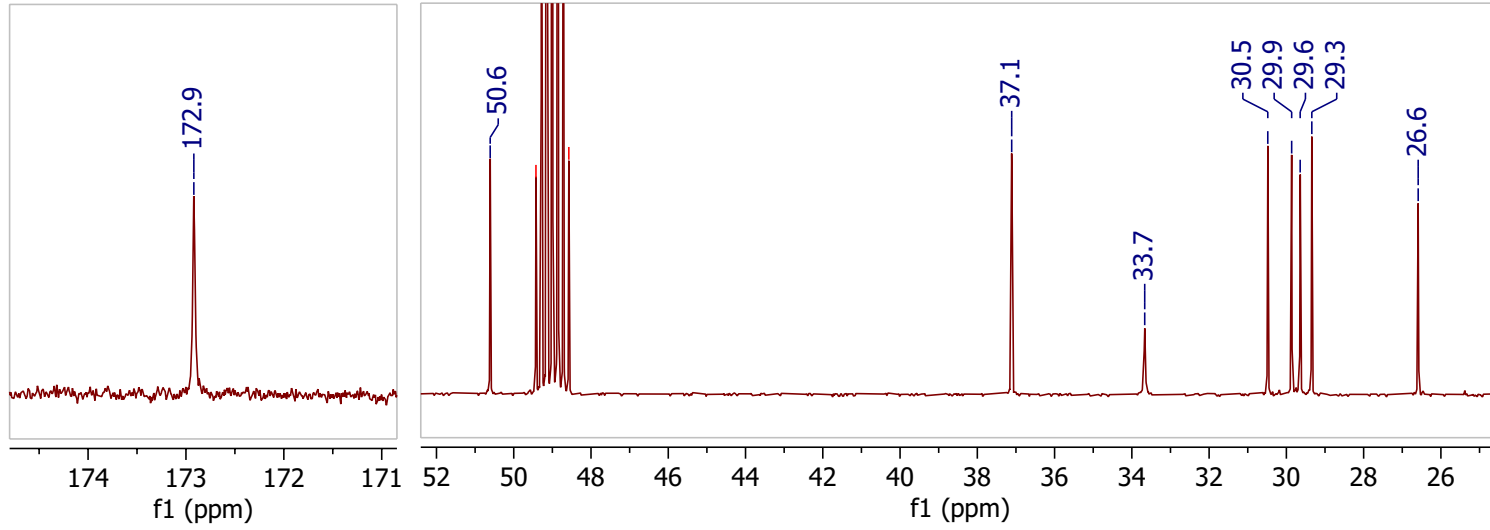

50.6  
49.4 MeOD  
49.3 MeOD  
49.1 MeOD  
49.0 MeOD  
48.9 MeOD  
48.7 MeOD  
48.6 MeOD

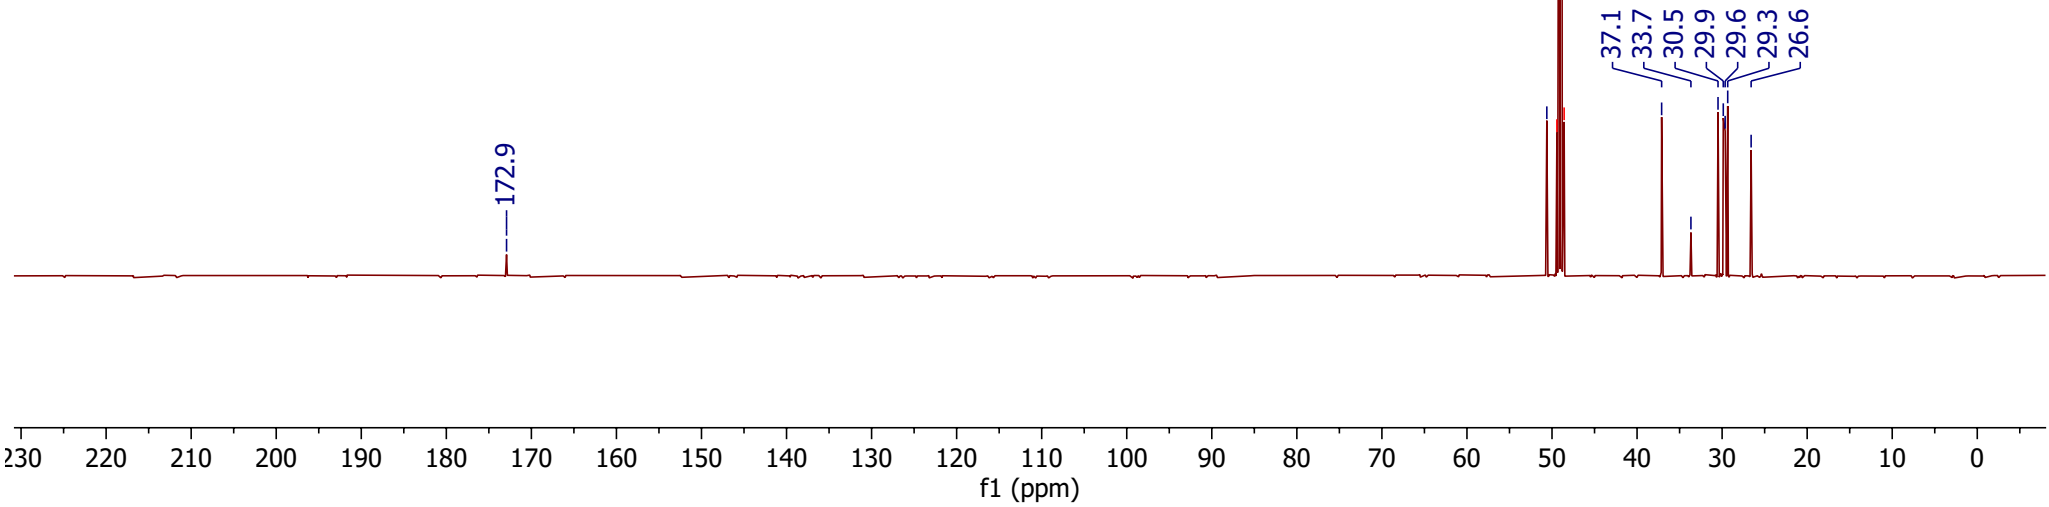

Compound 27  
<sup>1</sup>H NMR (400 MHz, CDCl<sub>3</sub>)

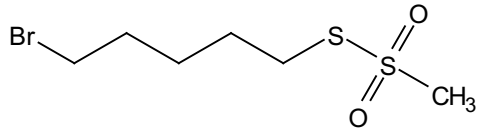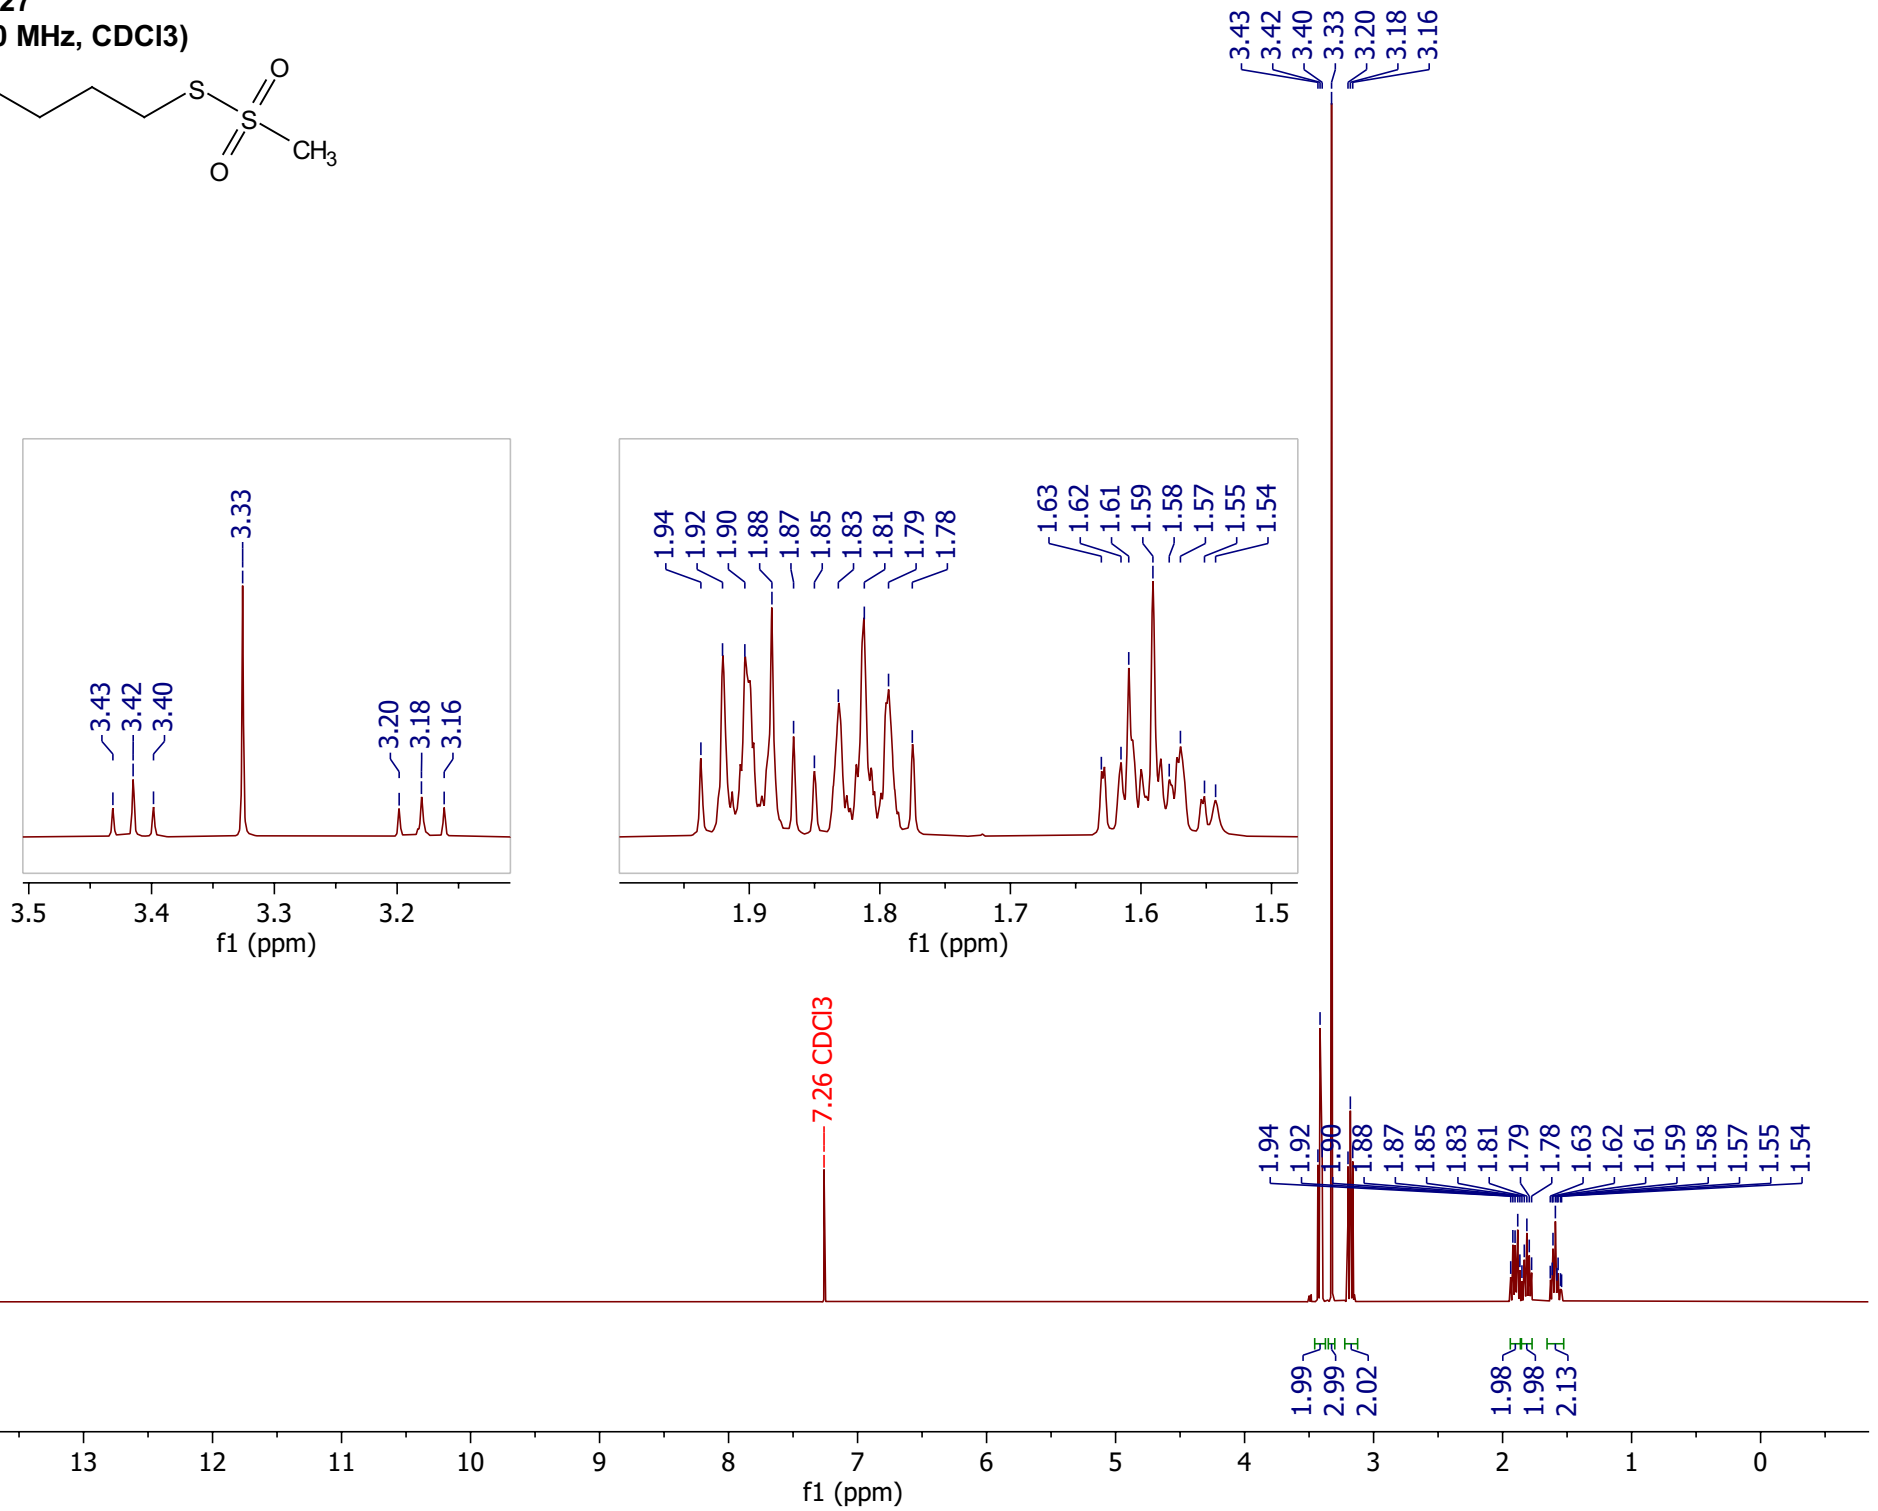

Compound 27  
<sup>13</sup>C NMR (101 MHz, CDCl<sub>3</sub>)

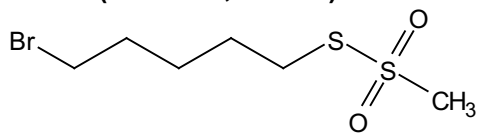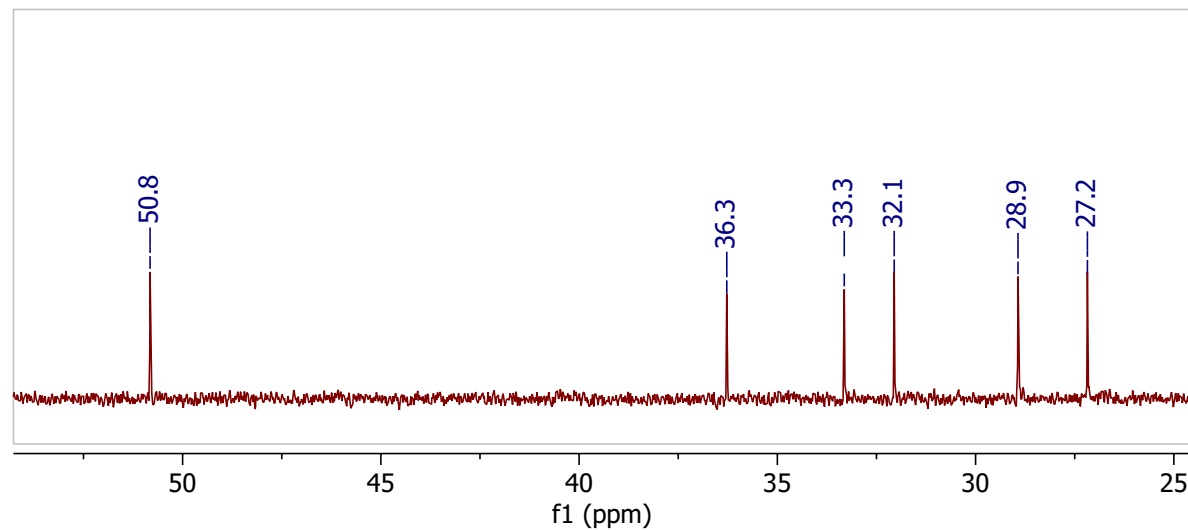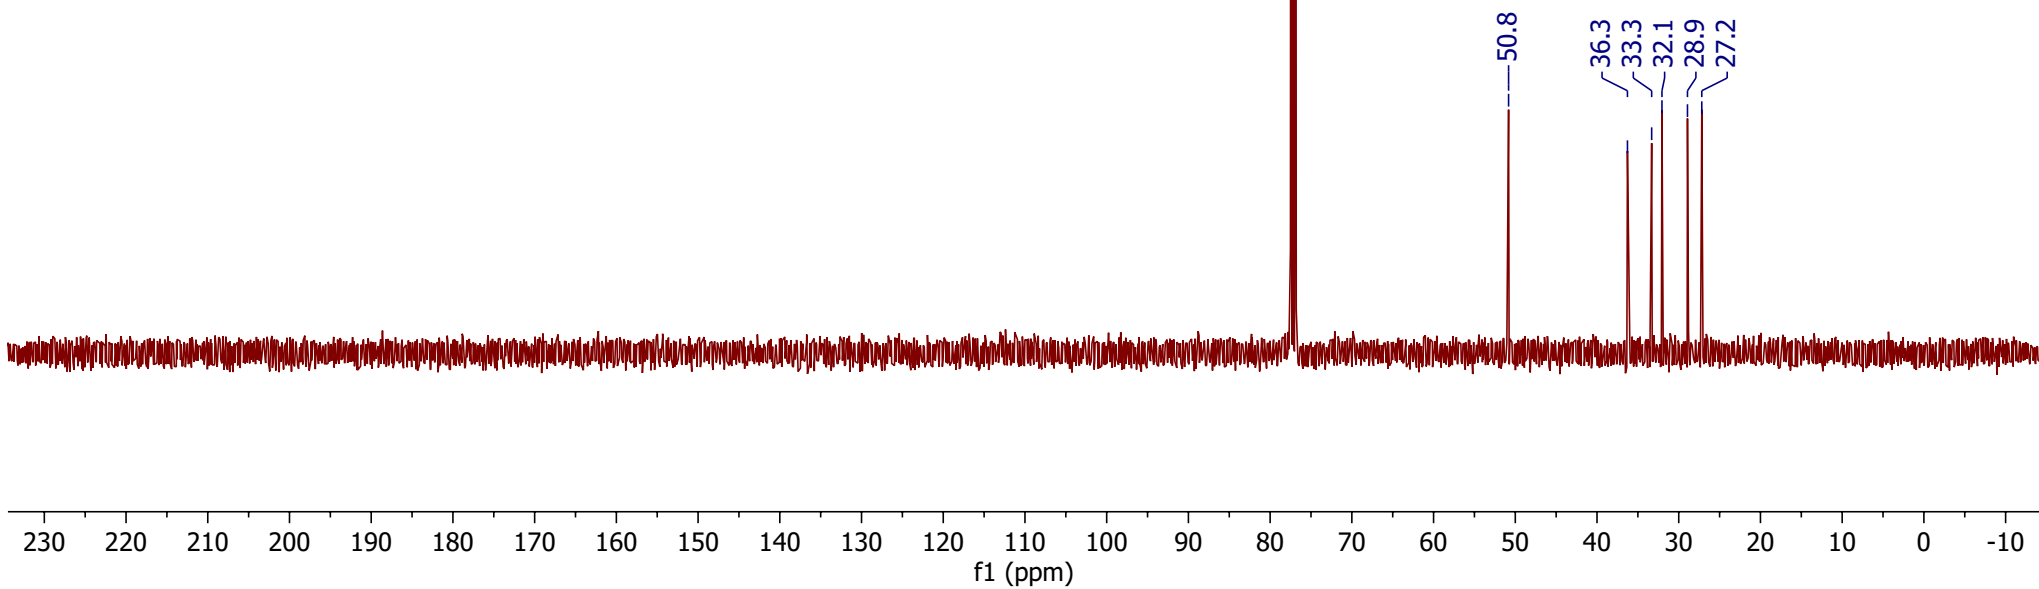

**Compound 28**  
**<sup>1</sup>H NMR (500 MHz, CDCl<sub>3</sub>)**

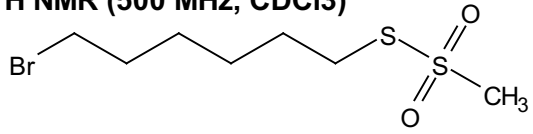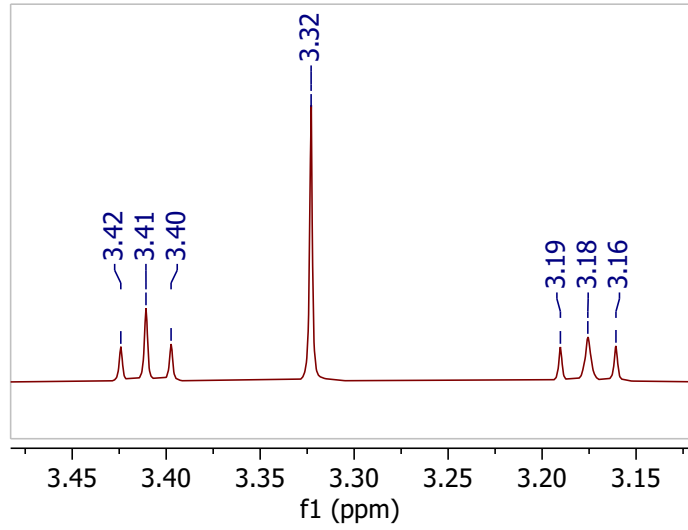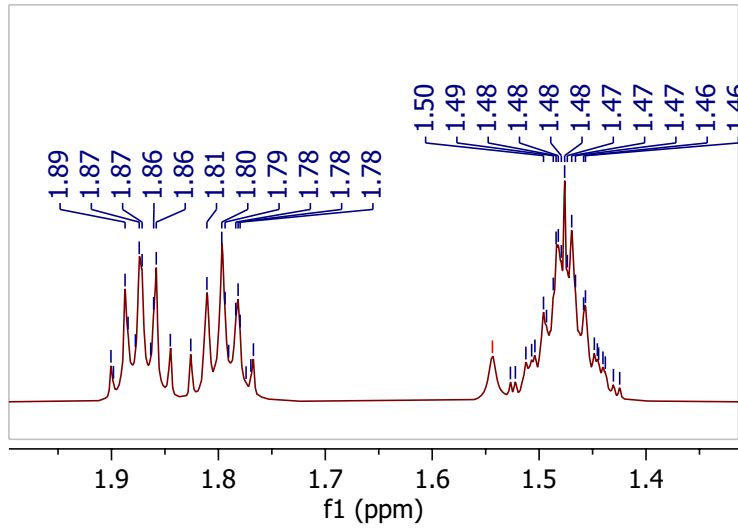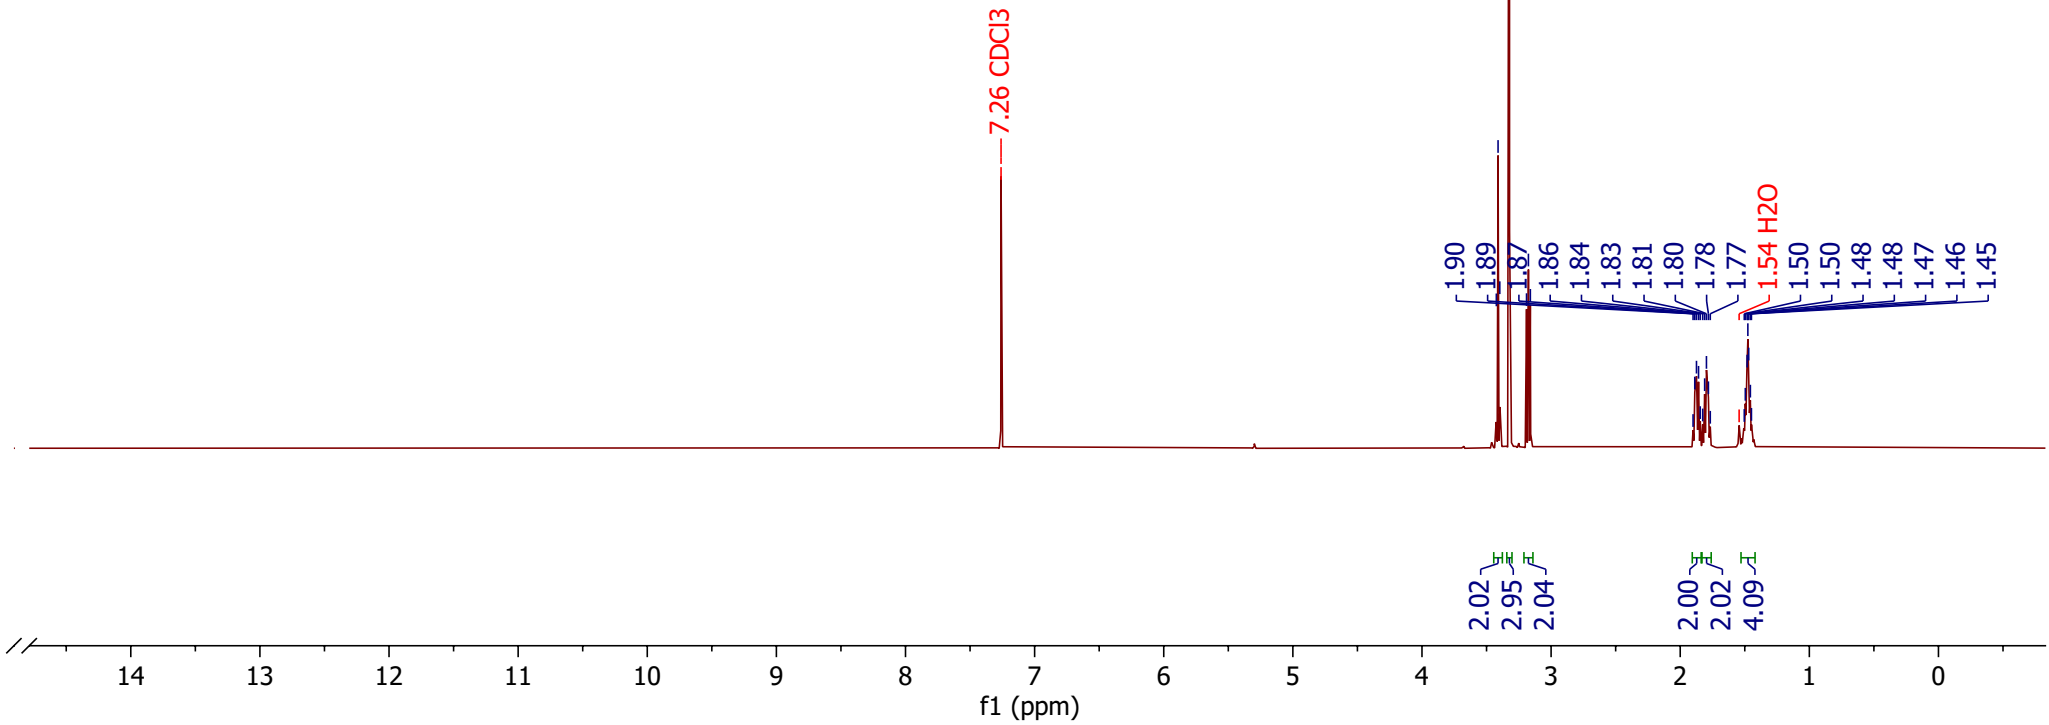

Compound 28

<sup>13</sup>C NMR (151 MHz, CDCl<sub>3</sub>)

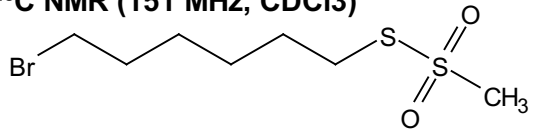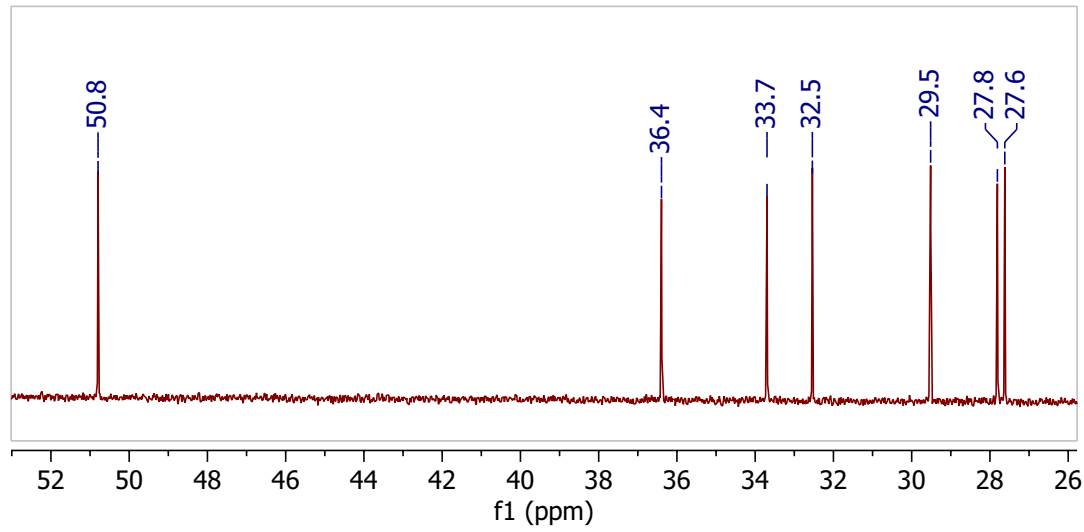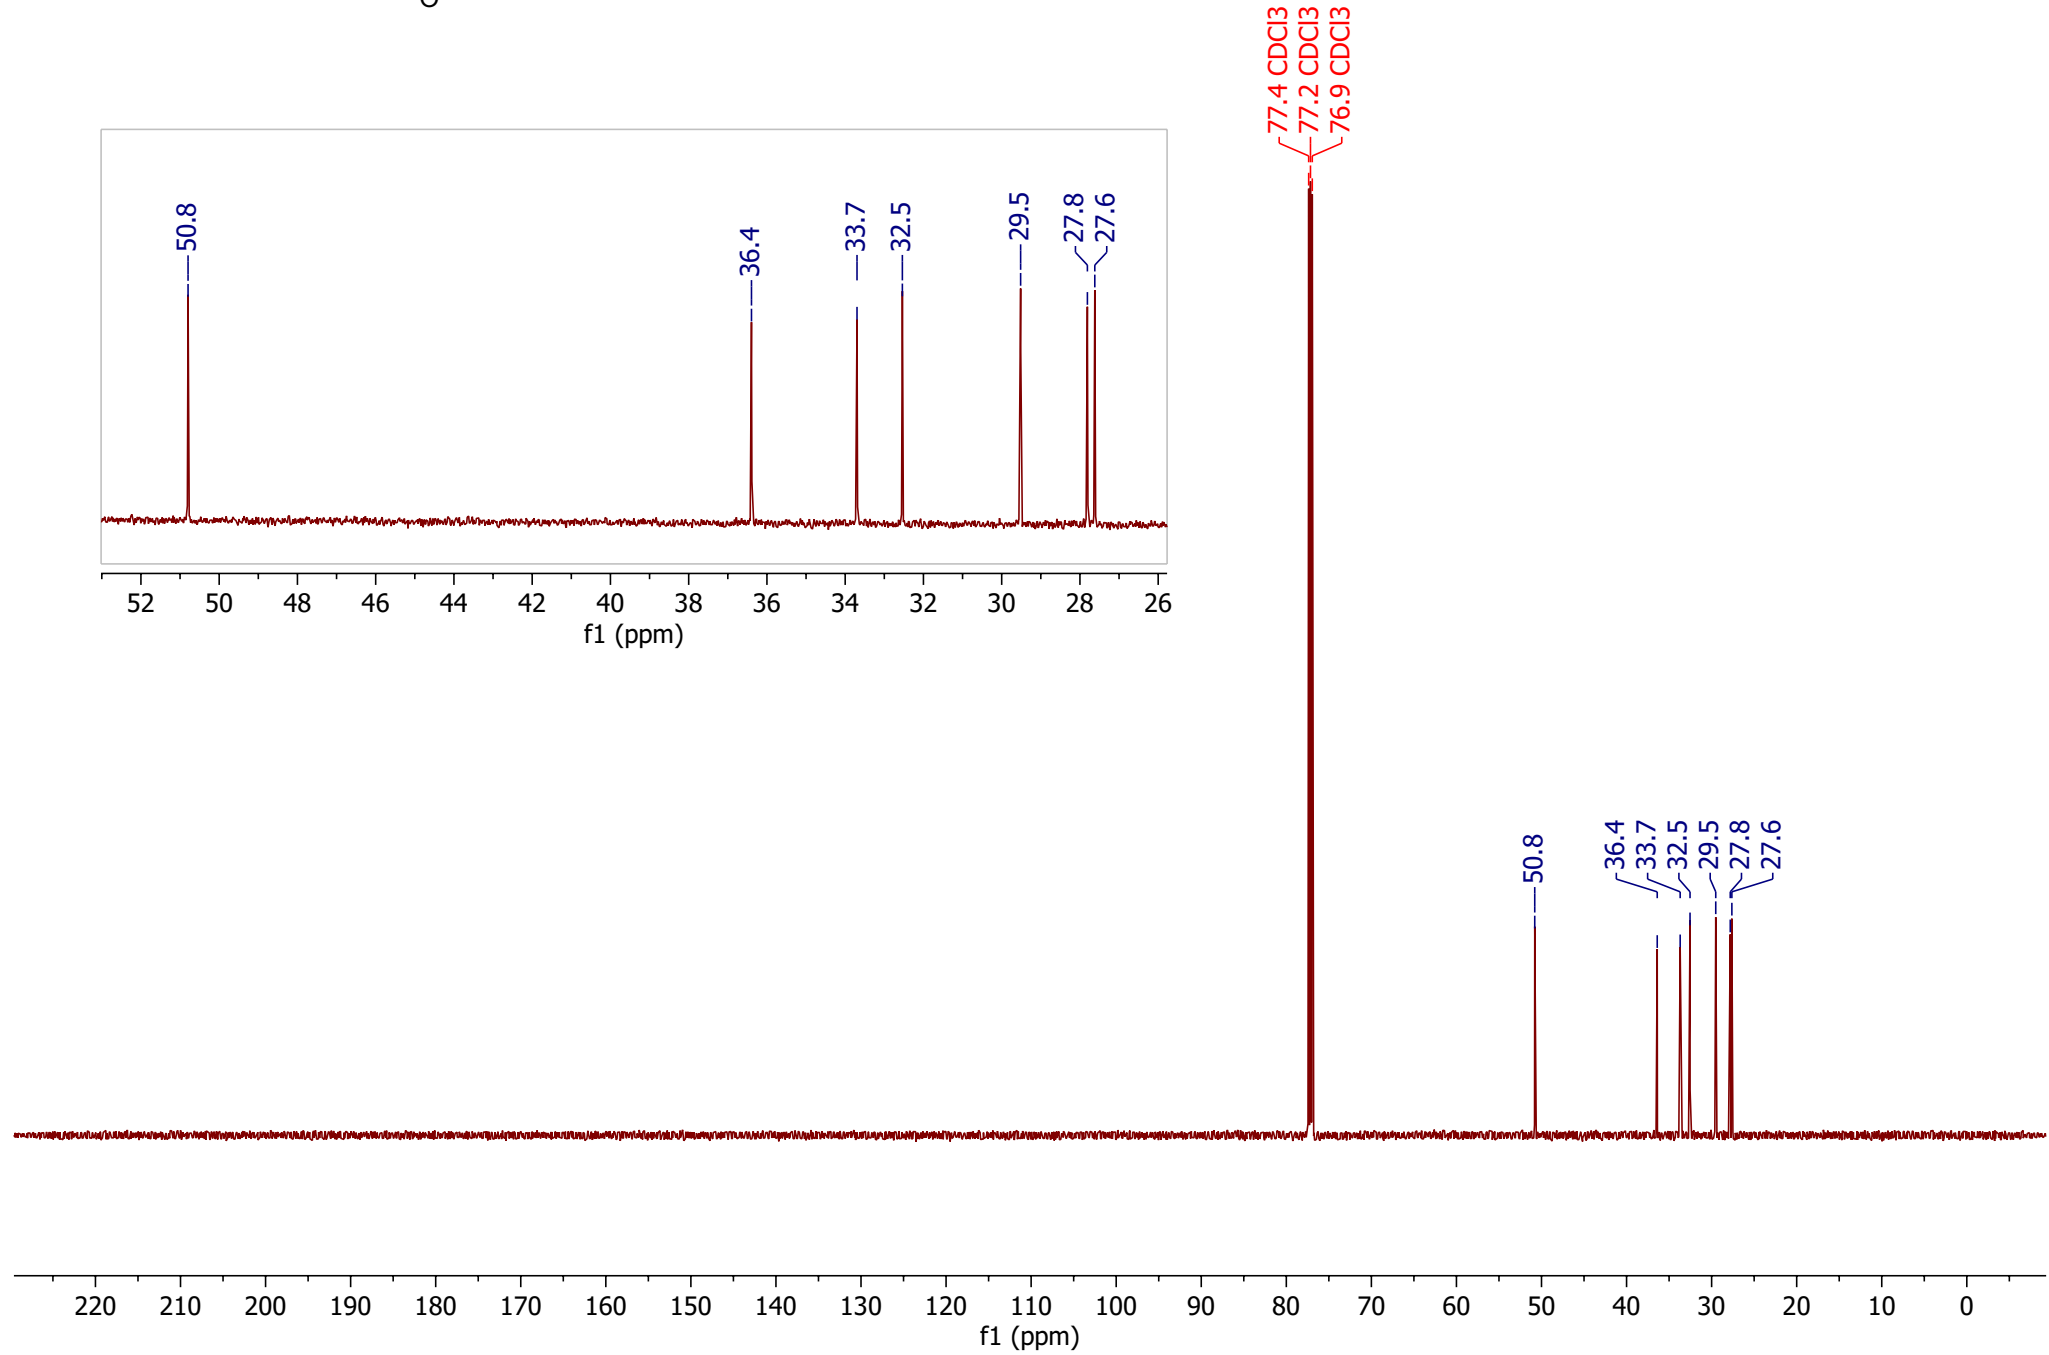

Compound 29  
1H NMR (500 MHz, CDCl3)

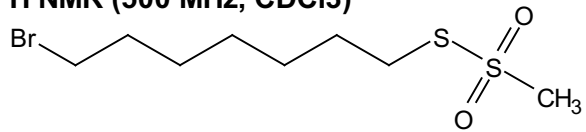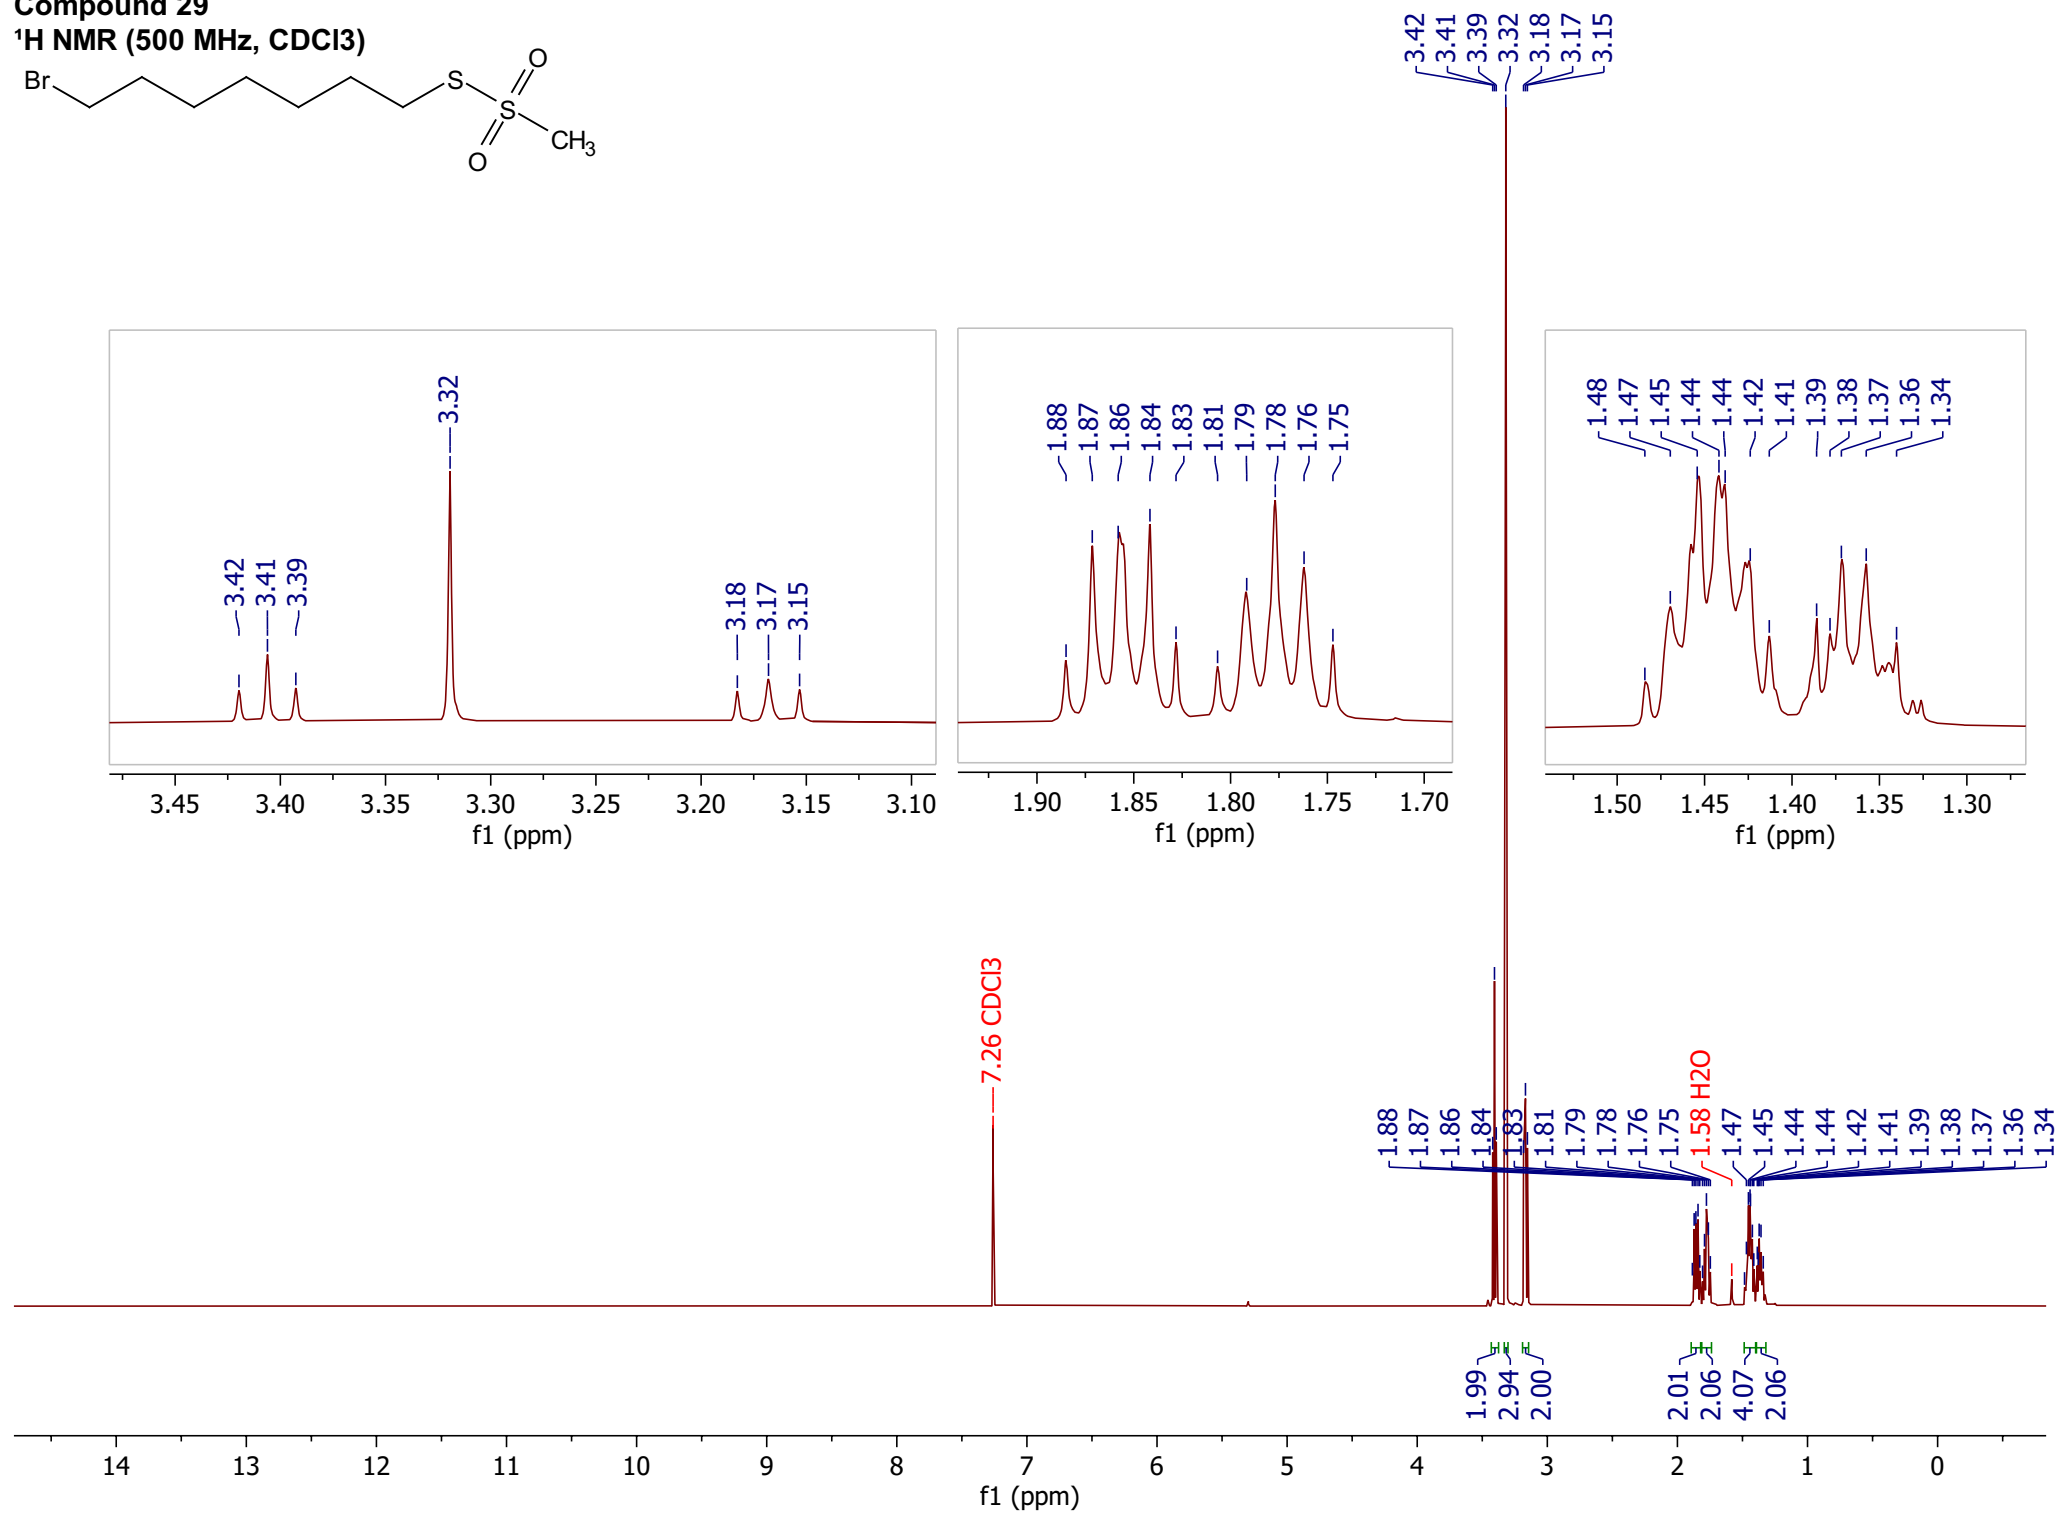

Compound 29  
<sup>13</sup>C NMR (151 MHz, CDCl<sub>3</sub>)

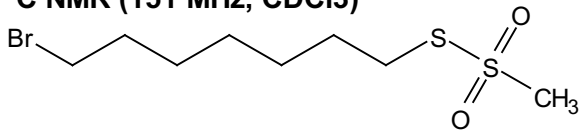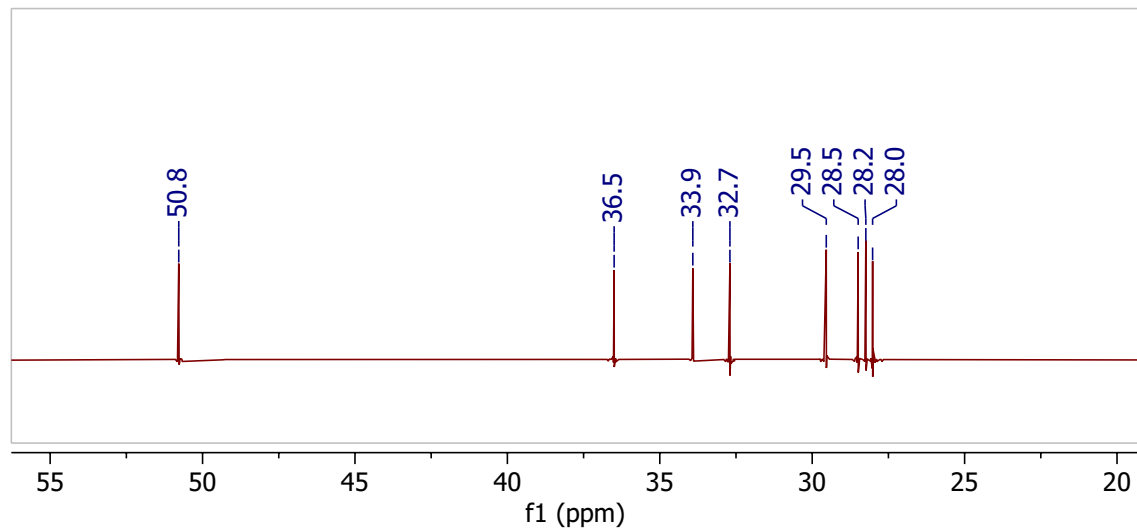

77.4 CDCl<sub>3</sub>  
77.2 CDCl<sub>3</sub>  
76.9 CDCl<sub>3</sub>

36.5  
33.9  
32.7  
29.5  
28.5  
28.2  
28.0

50.8

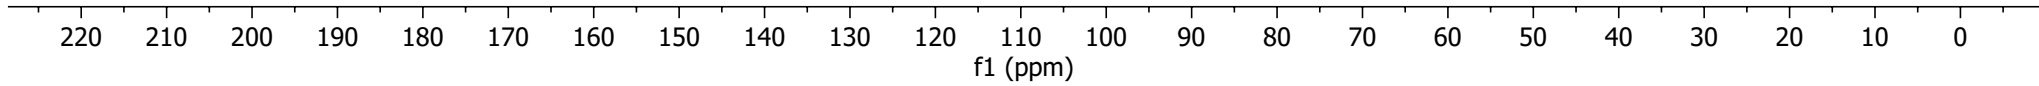

Compound 30  
1H NMR (500 MHz, CDCl3)

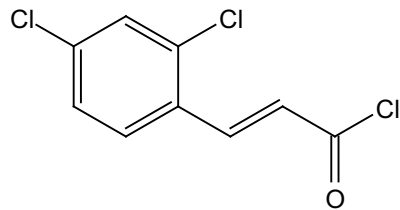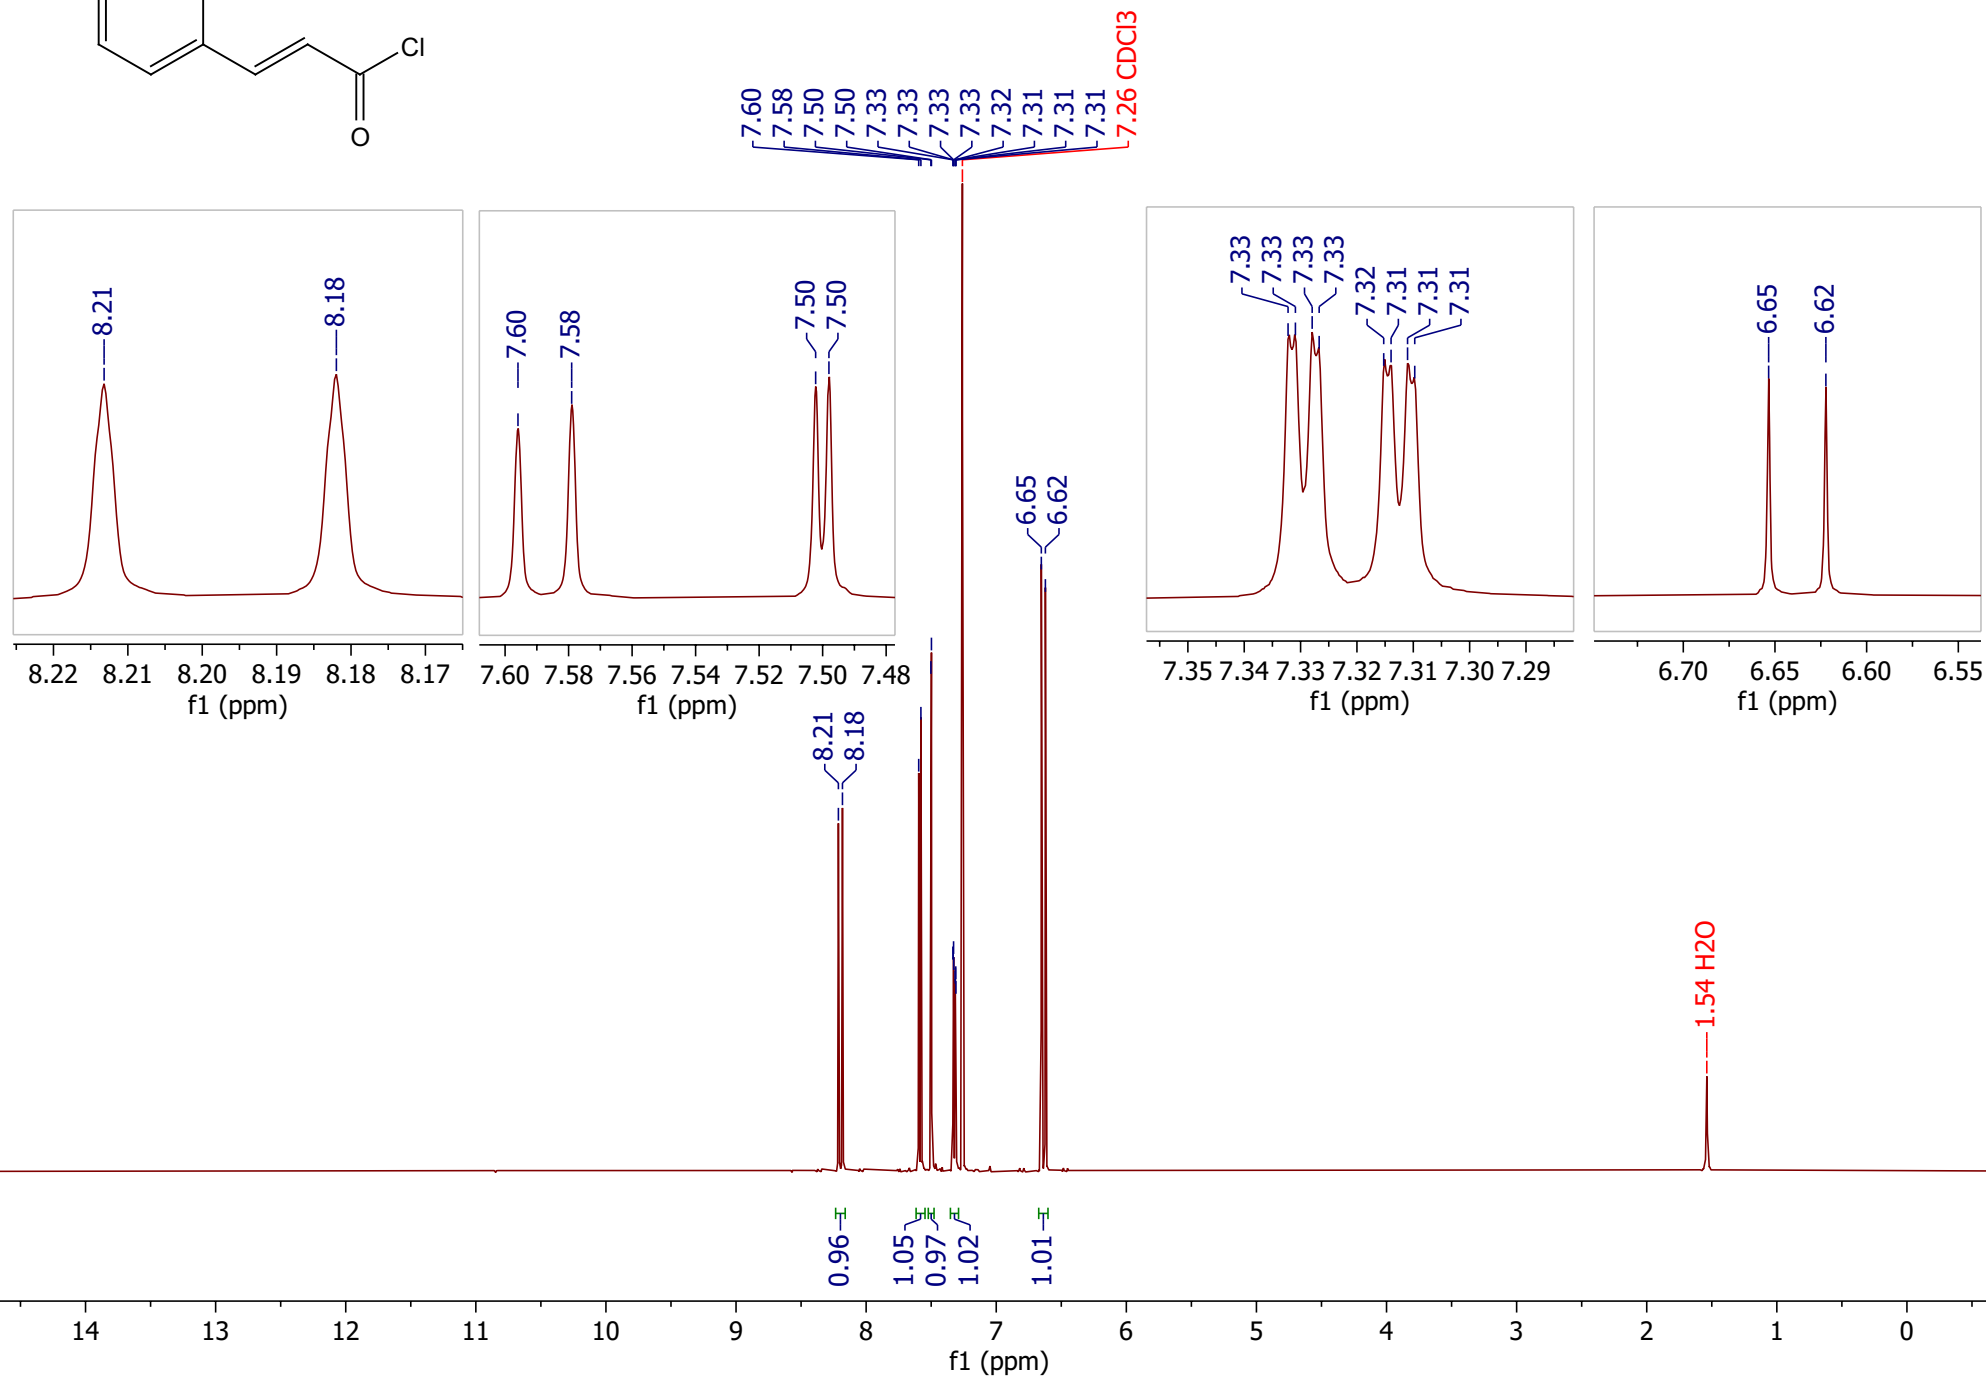



Compound 30  
<sup>13</sup>C NMR (126 MHz, CDCl<sub>3</sub>)

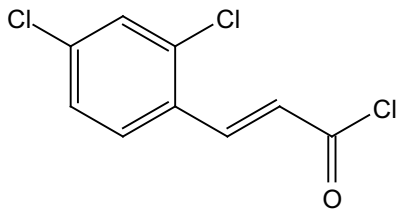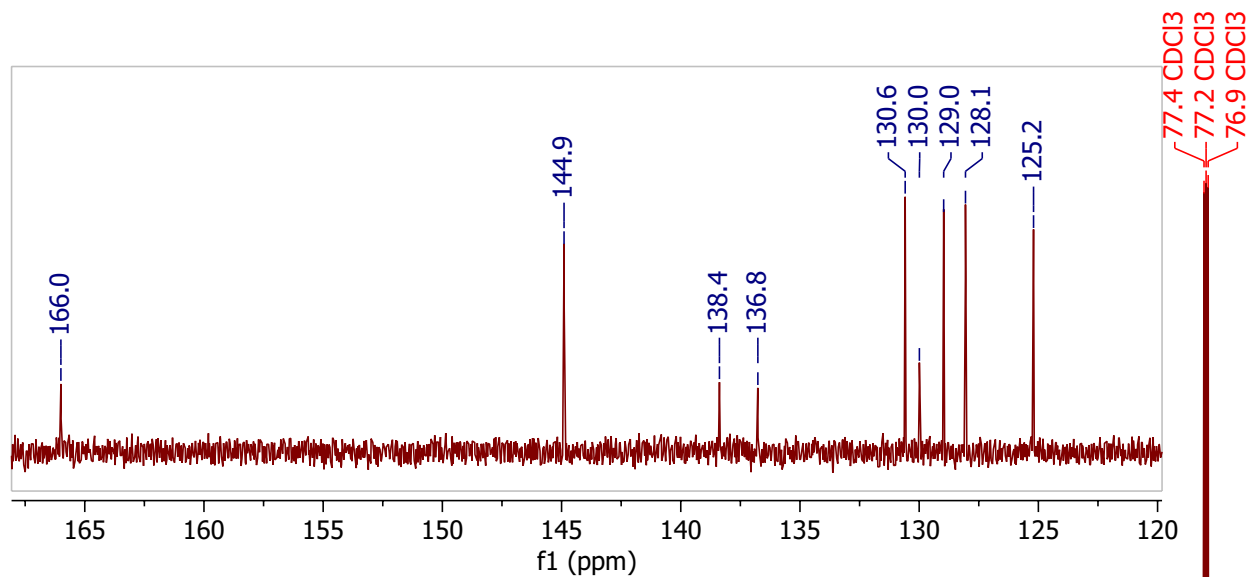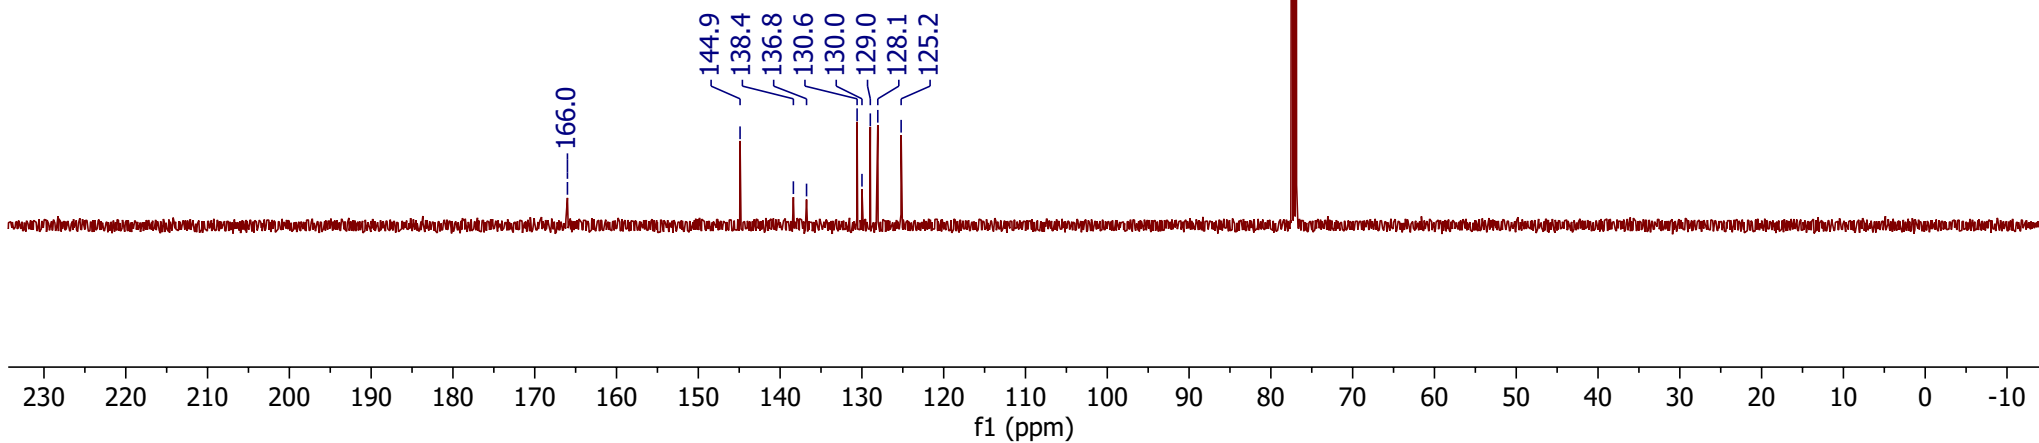

Compound 31  
<sup>1</sup>H NMR (600 MHz, DMSO-d6)

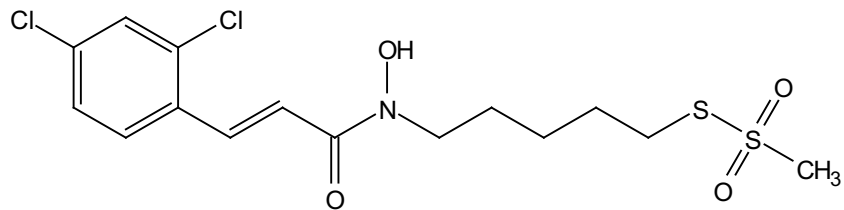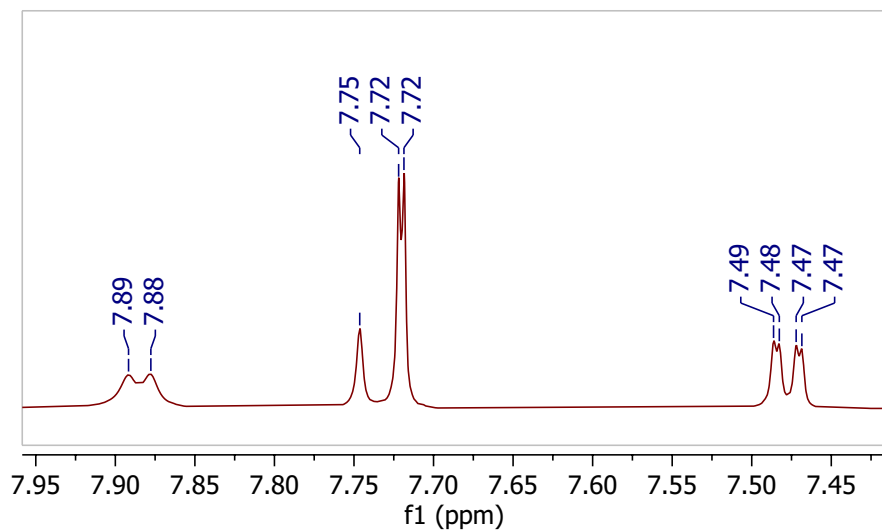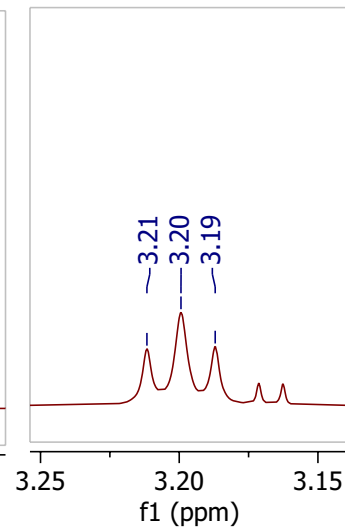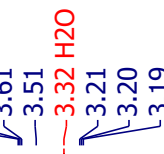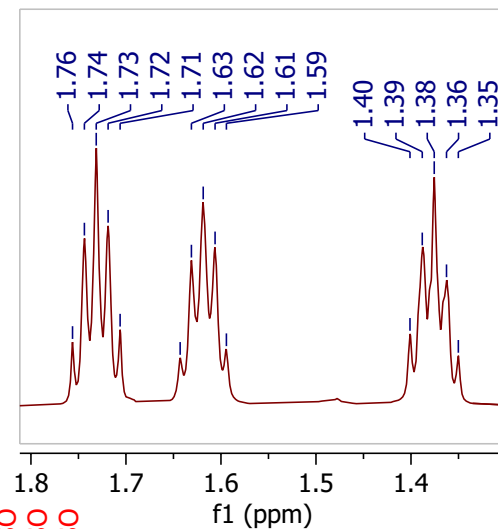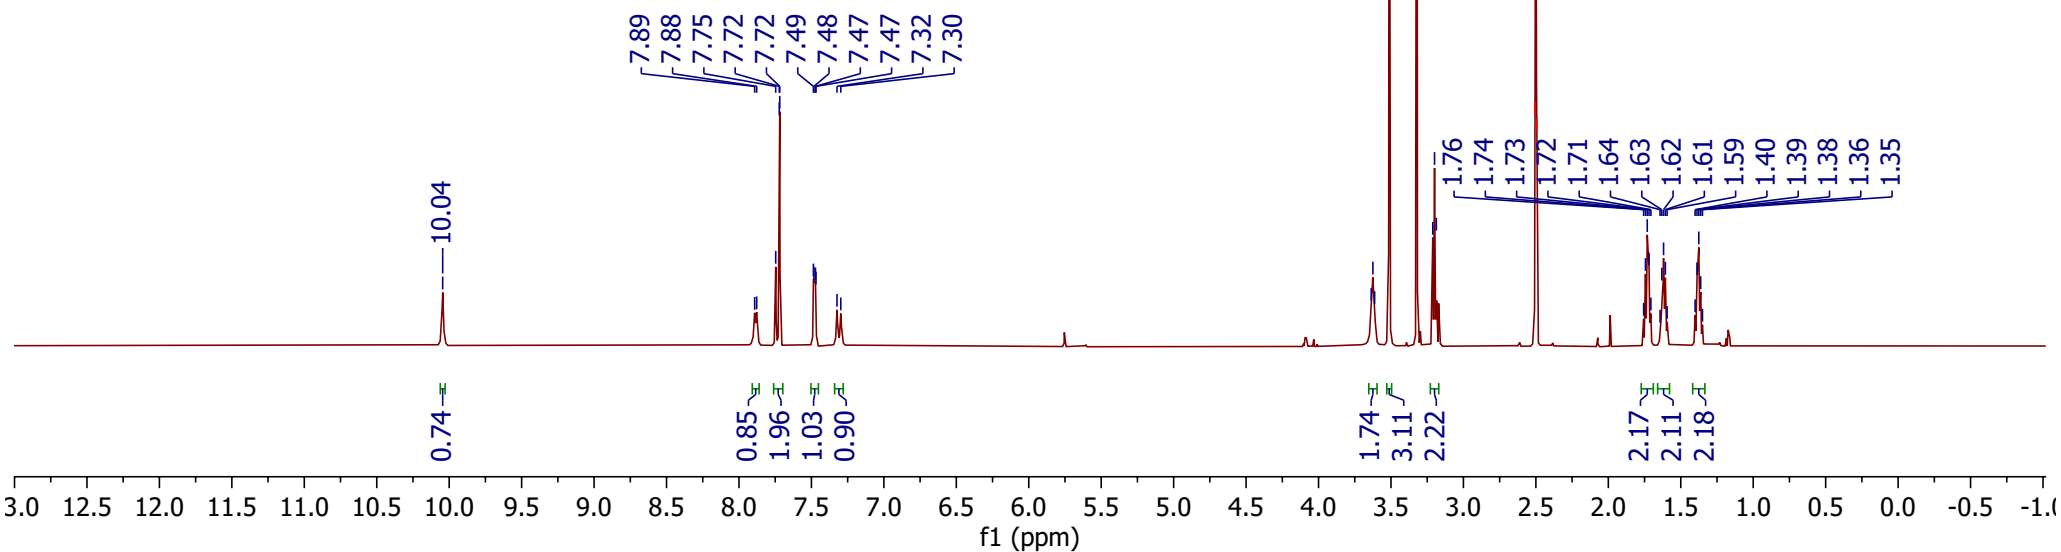

Compound 31  
<sup>1</sup>H NMR (151 MHz, DMSO-d6)

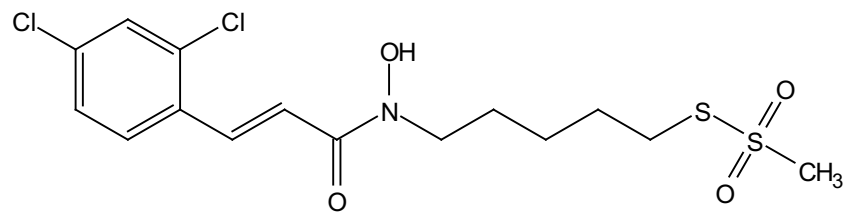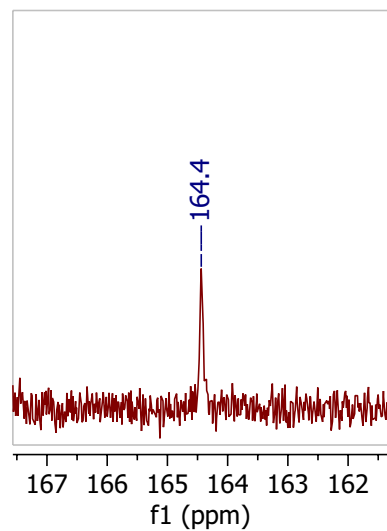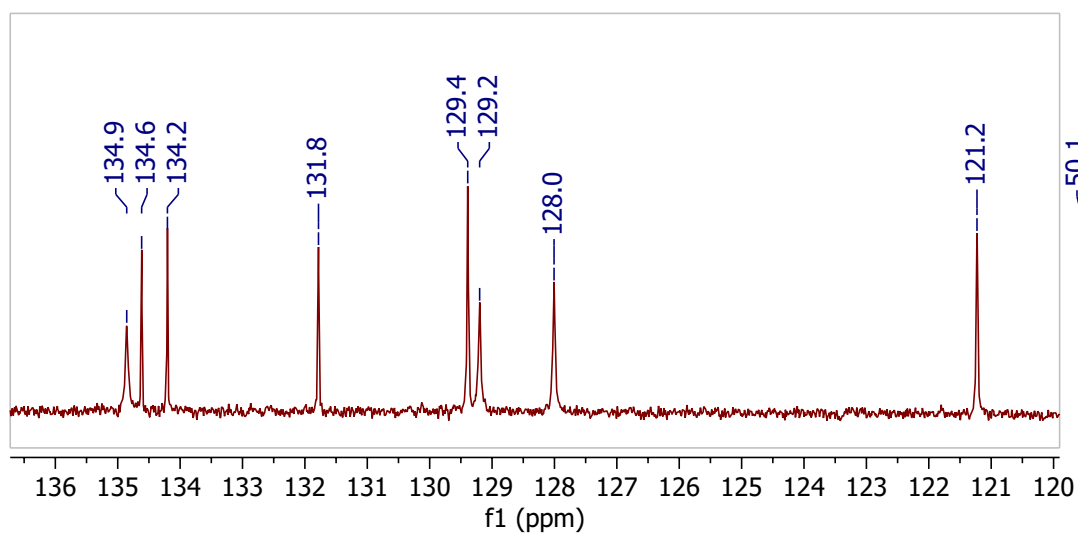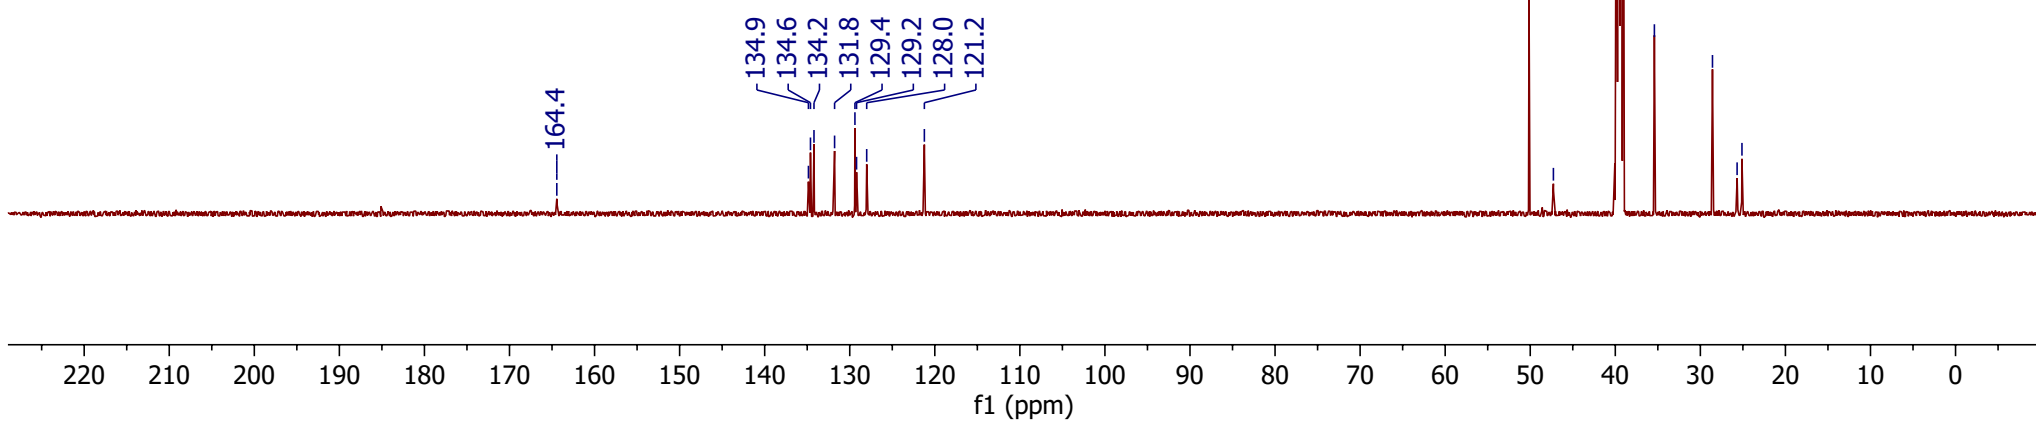

Compound 32  
<sup>1</sup>H NMR (600 MHz, DMSO-d<sub>6</sub>)

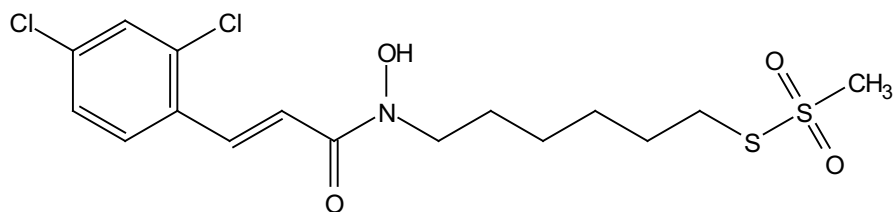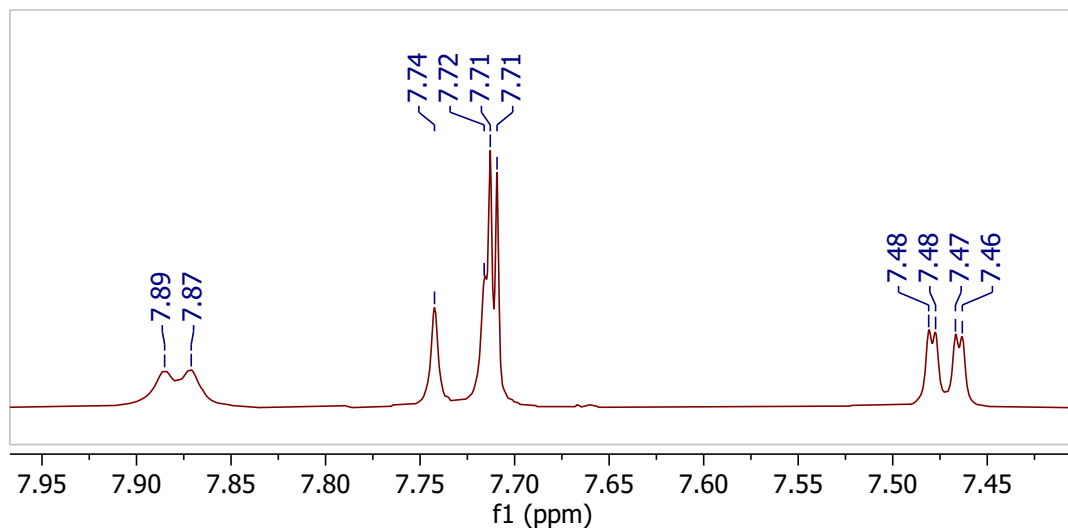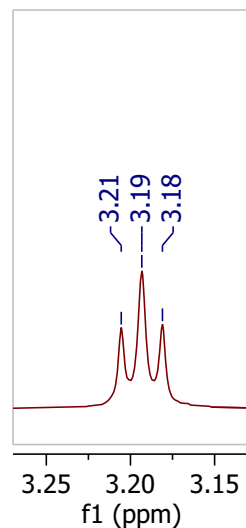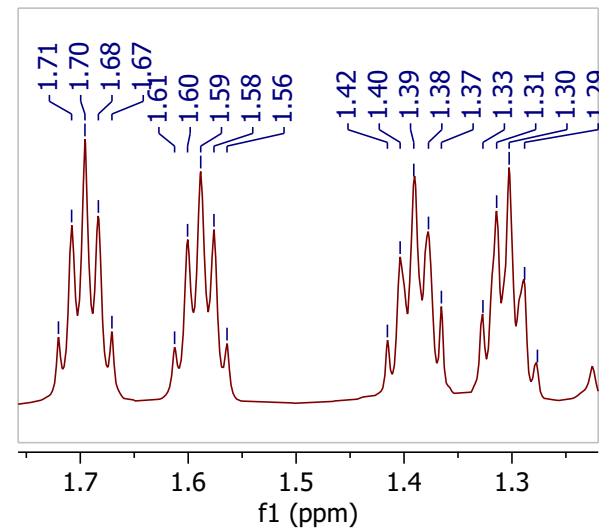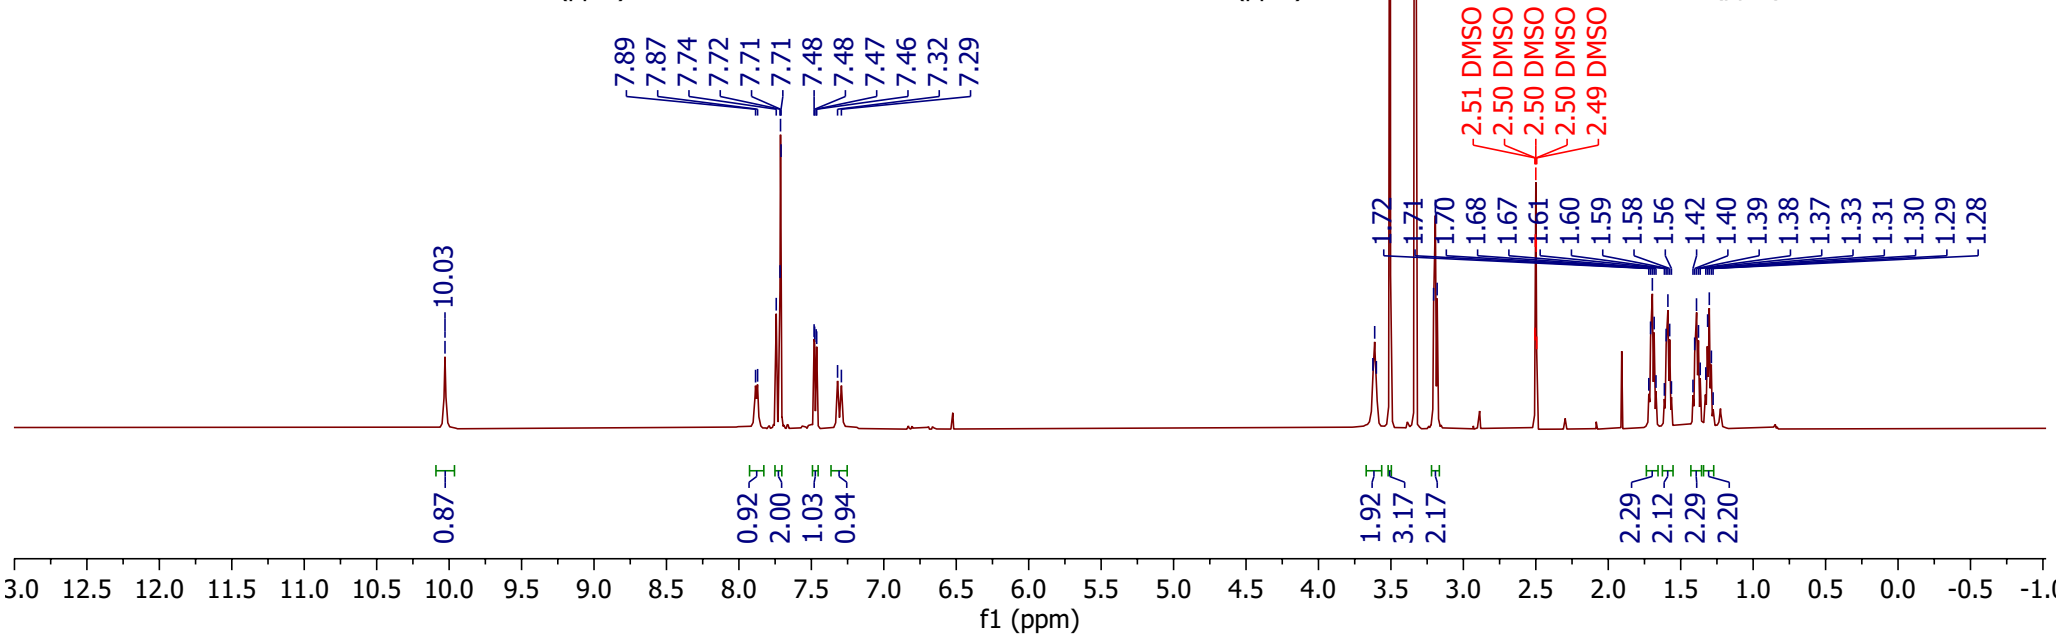

Compound 32  
<sup>1</sup>H NMR (151 MHz, DMSO-d6)

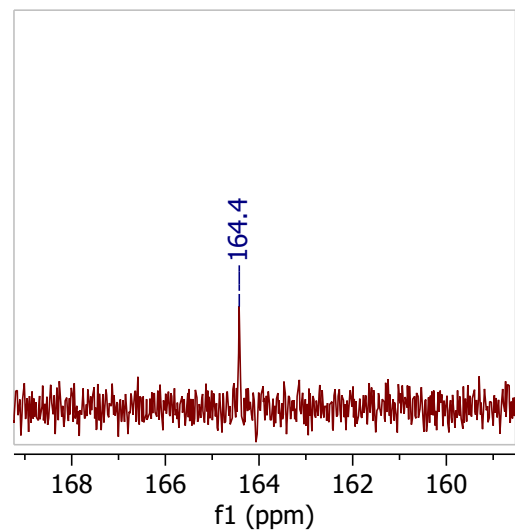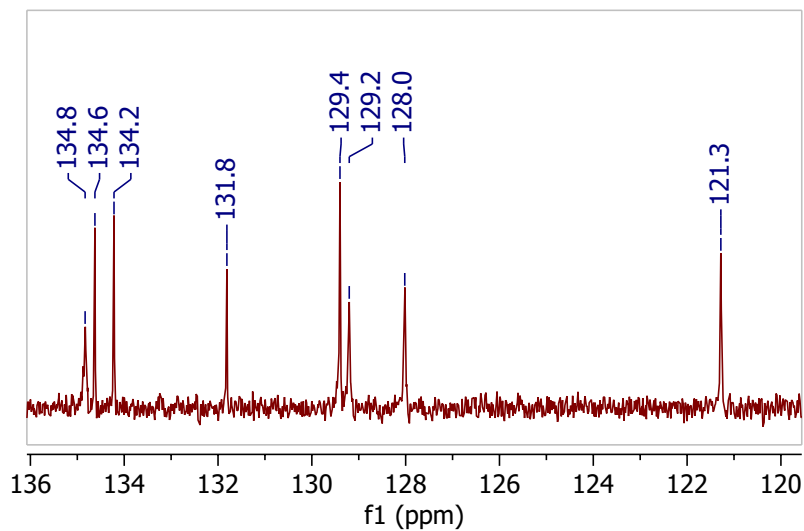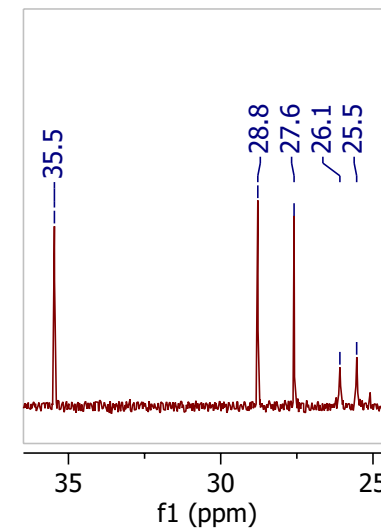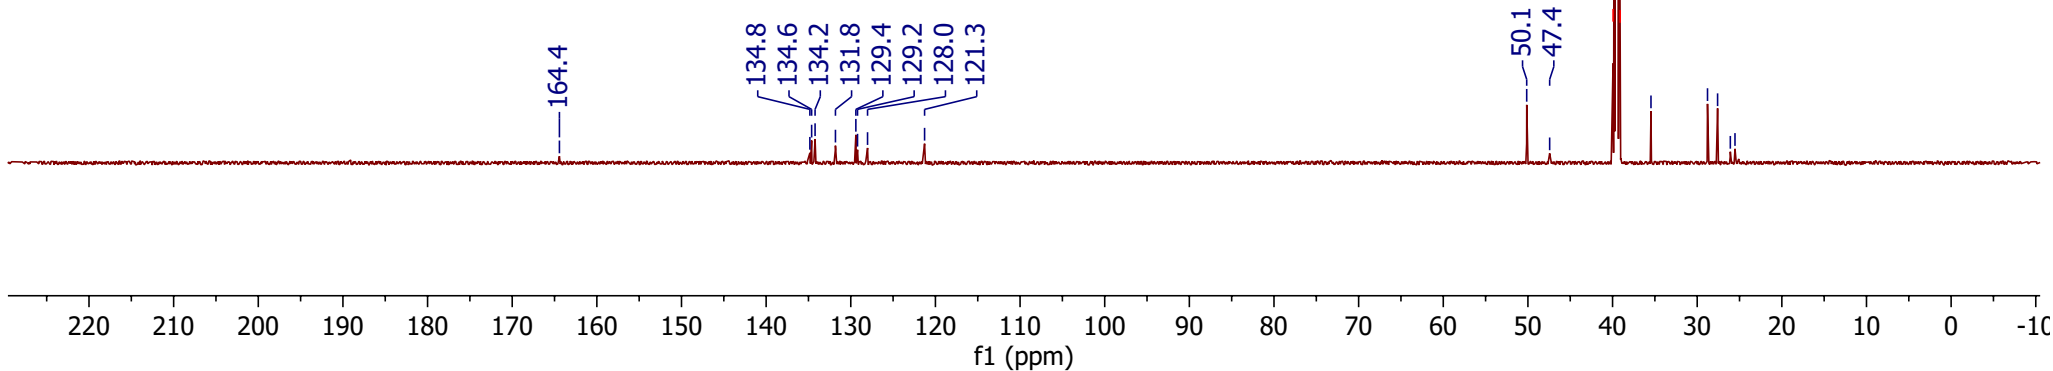

Compound 33  
<sup>1</sup>H NMR (600 MHz, DMSO-d6)

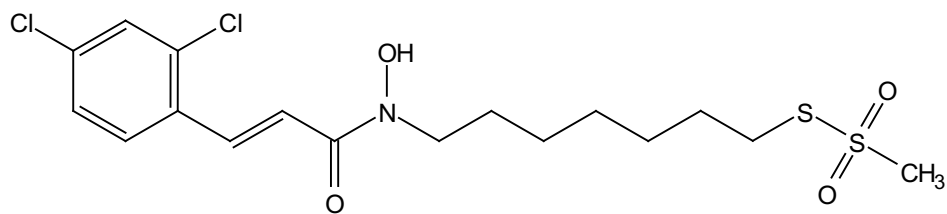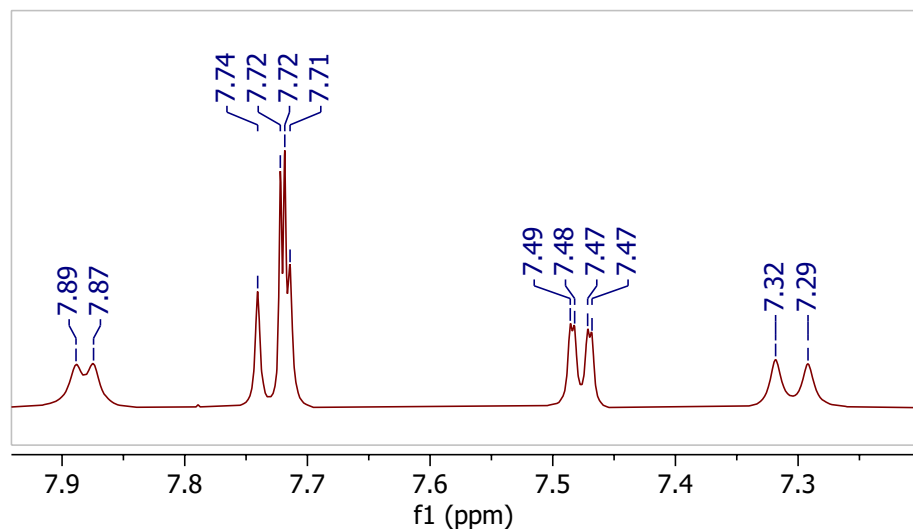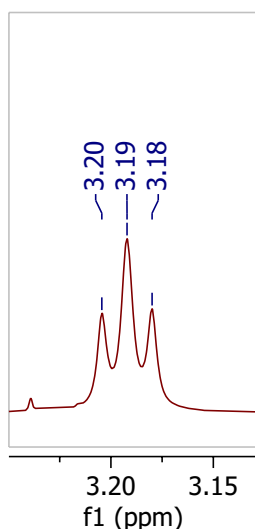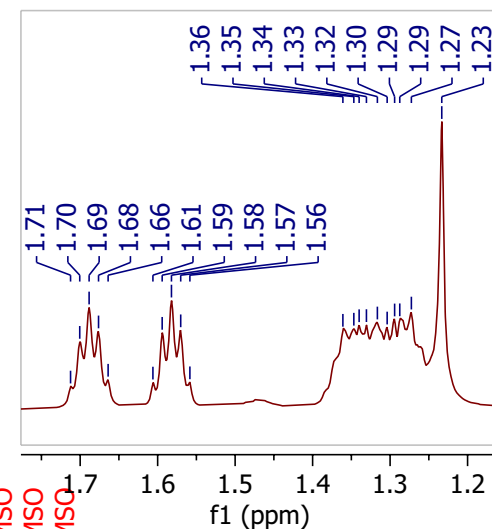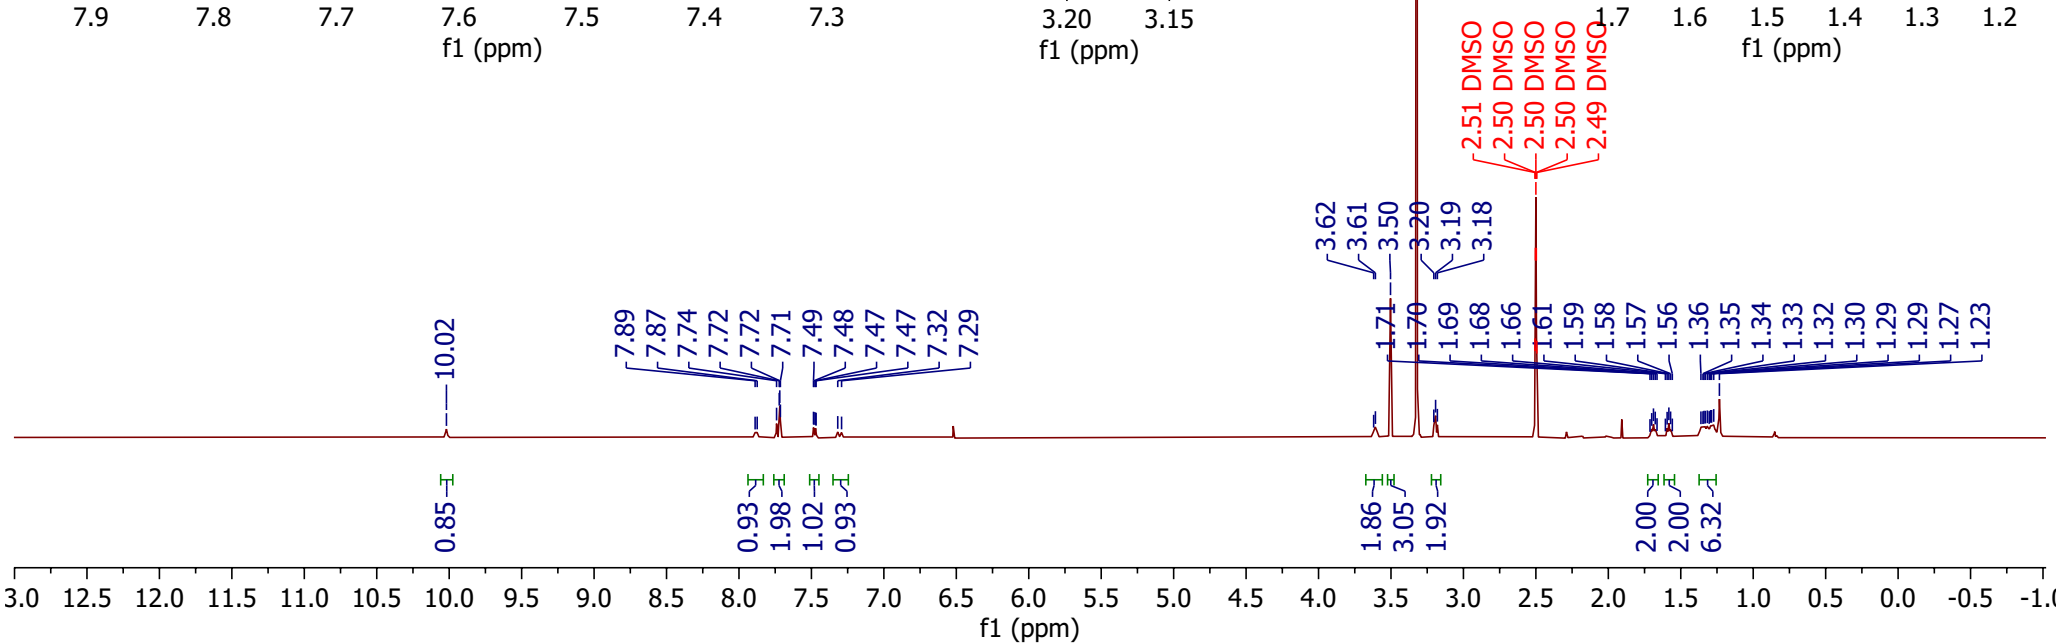

Compound 33  
<sup>1</sup>H NMR (151 MHz, DMSO-d6)

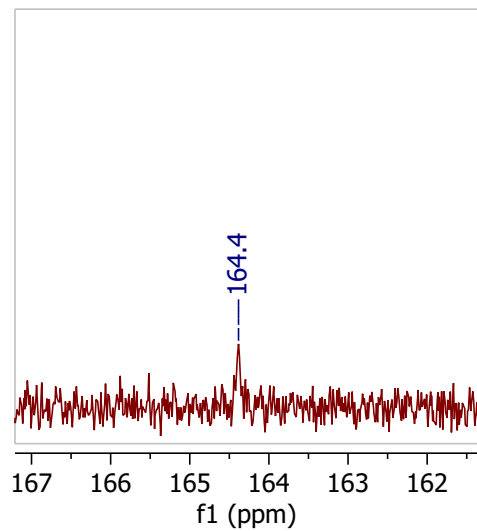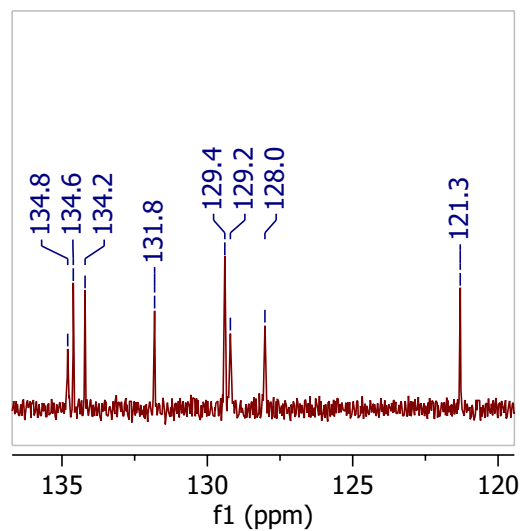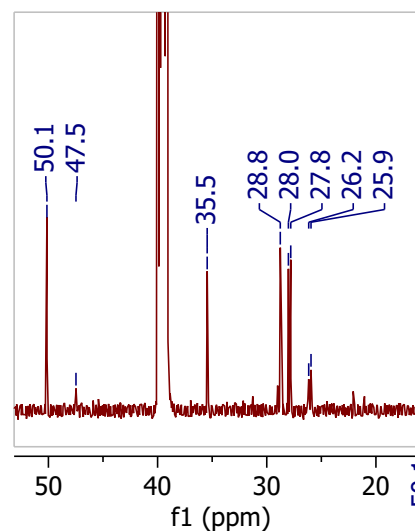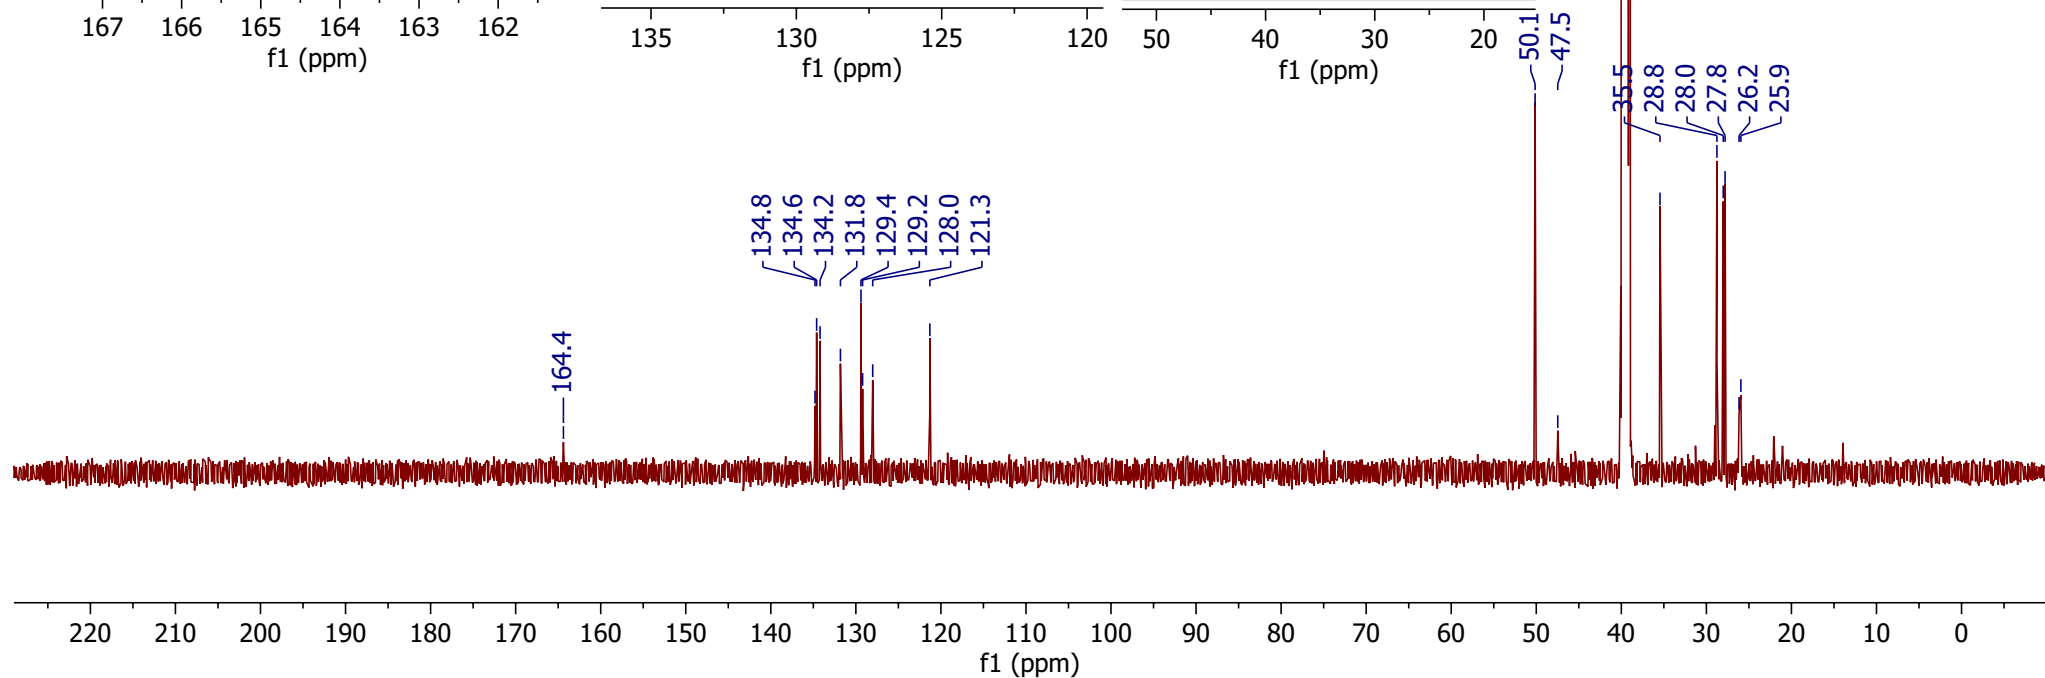

Compound 35  
1H NMR (600 MHz, CDCl3)

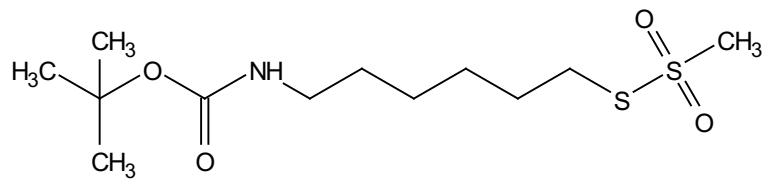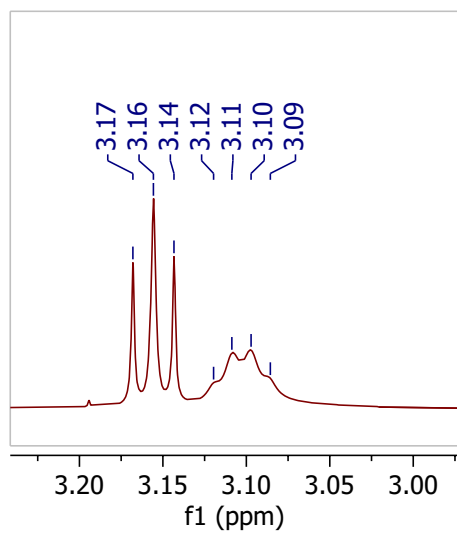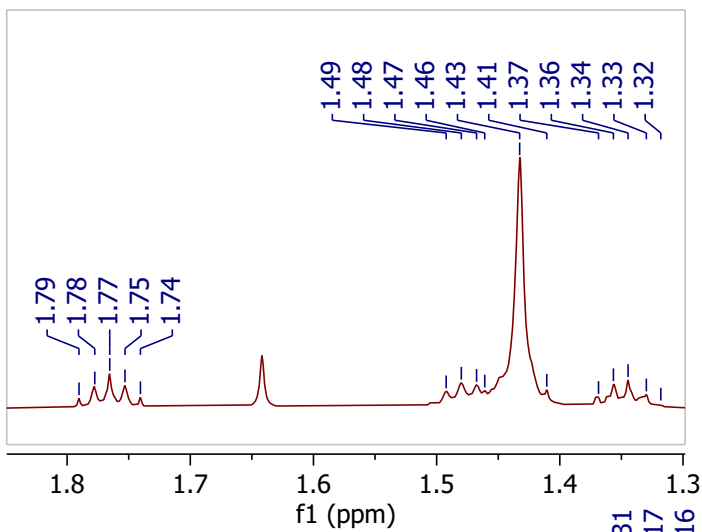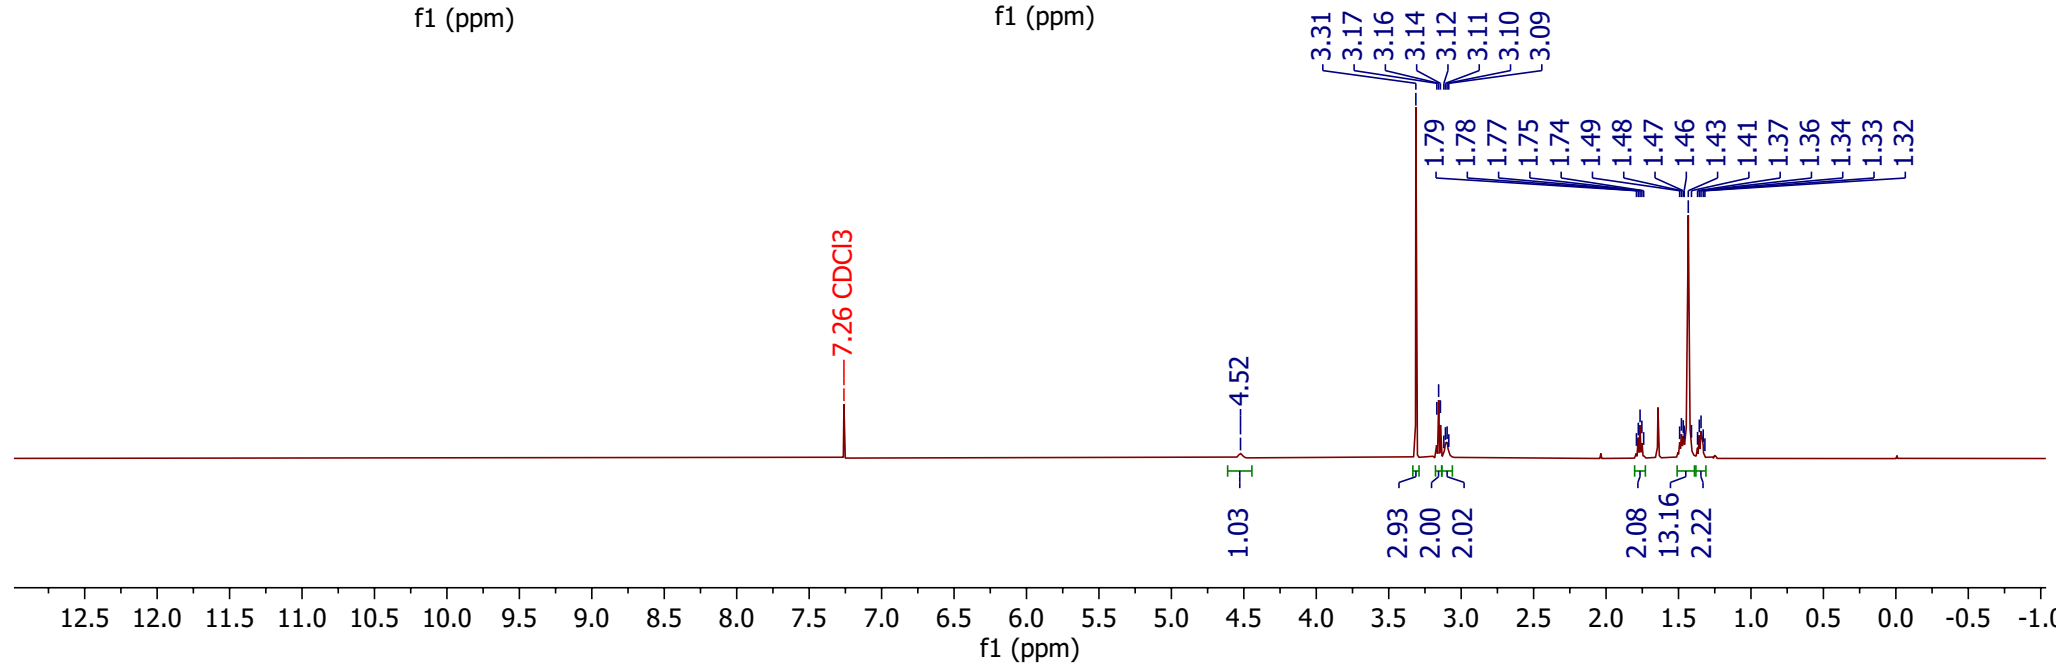



**Compound 35**  
**<sup>13</sup>C NMR (151 MHz, CDCl<sub>3</sub>)**

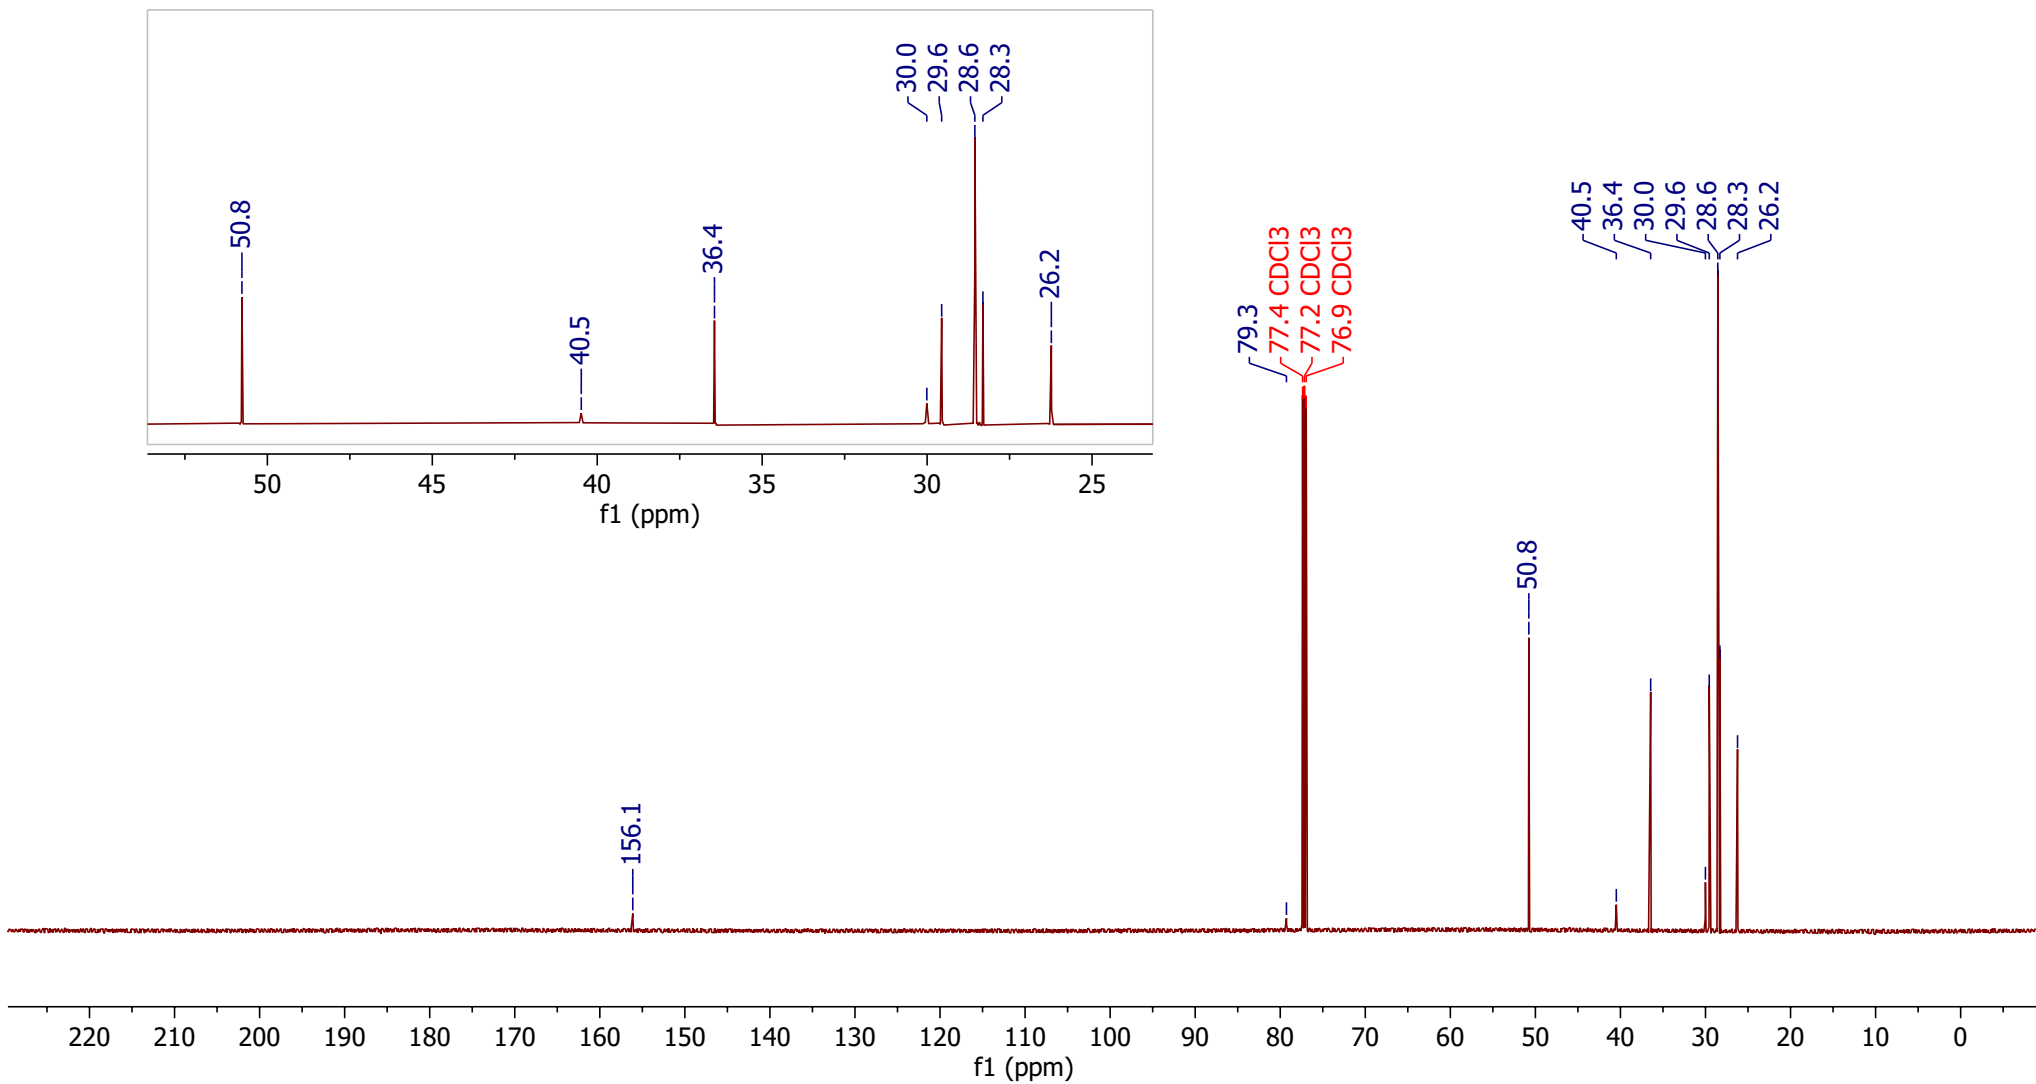

Compound 36  
<sup>1</sup>H NMR (600 MHz, MeOD-d4)

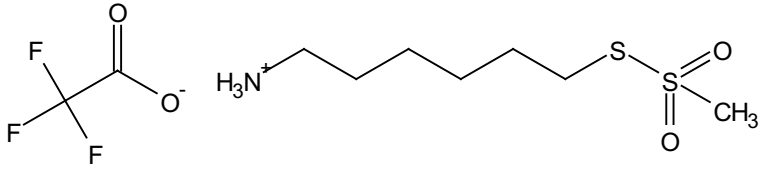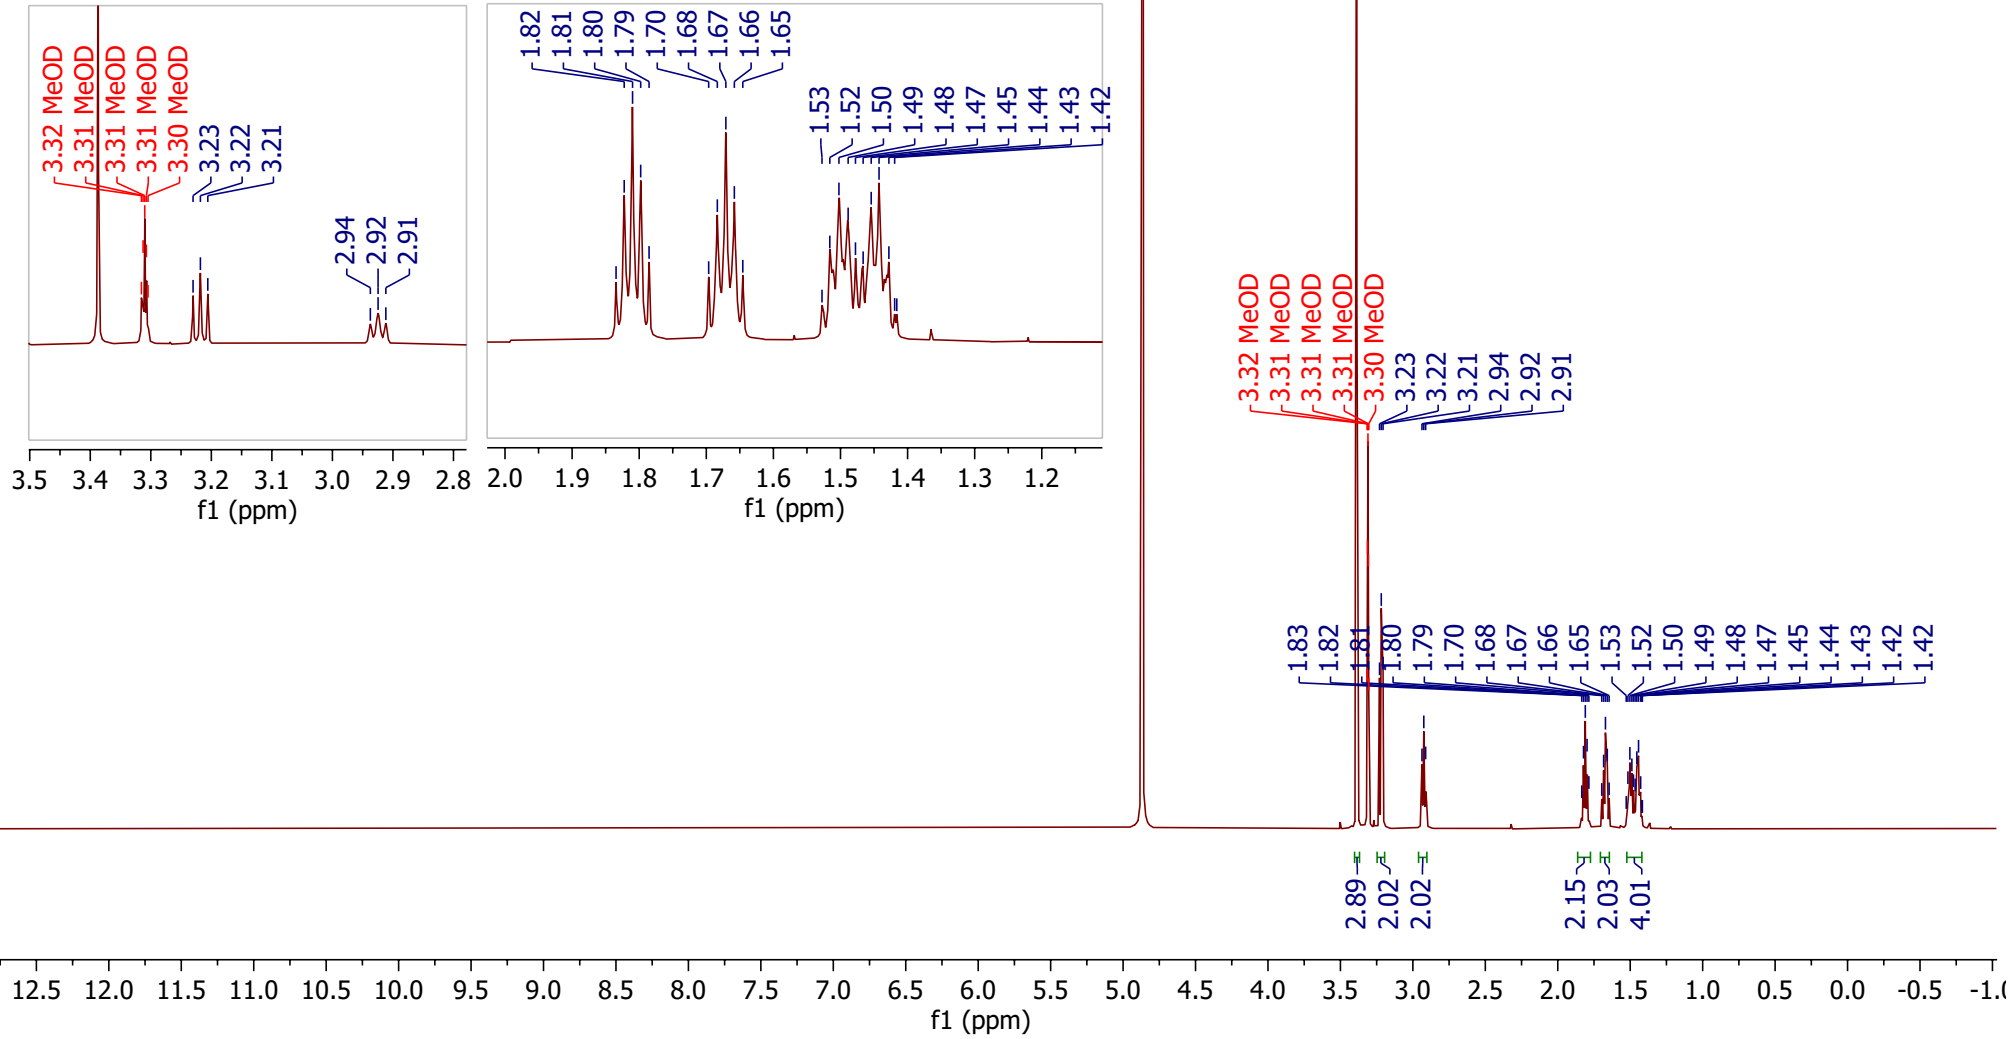

Compound 36  
<sup>1</sup>H NMR (151 MHz, MeOD-d4)

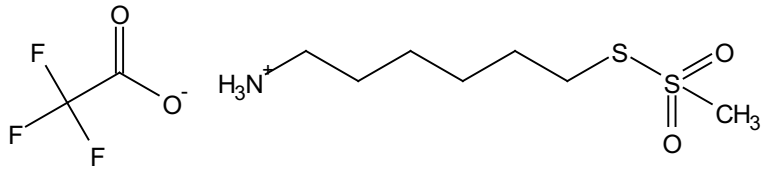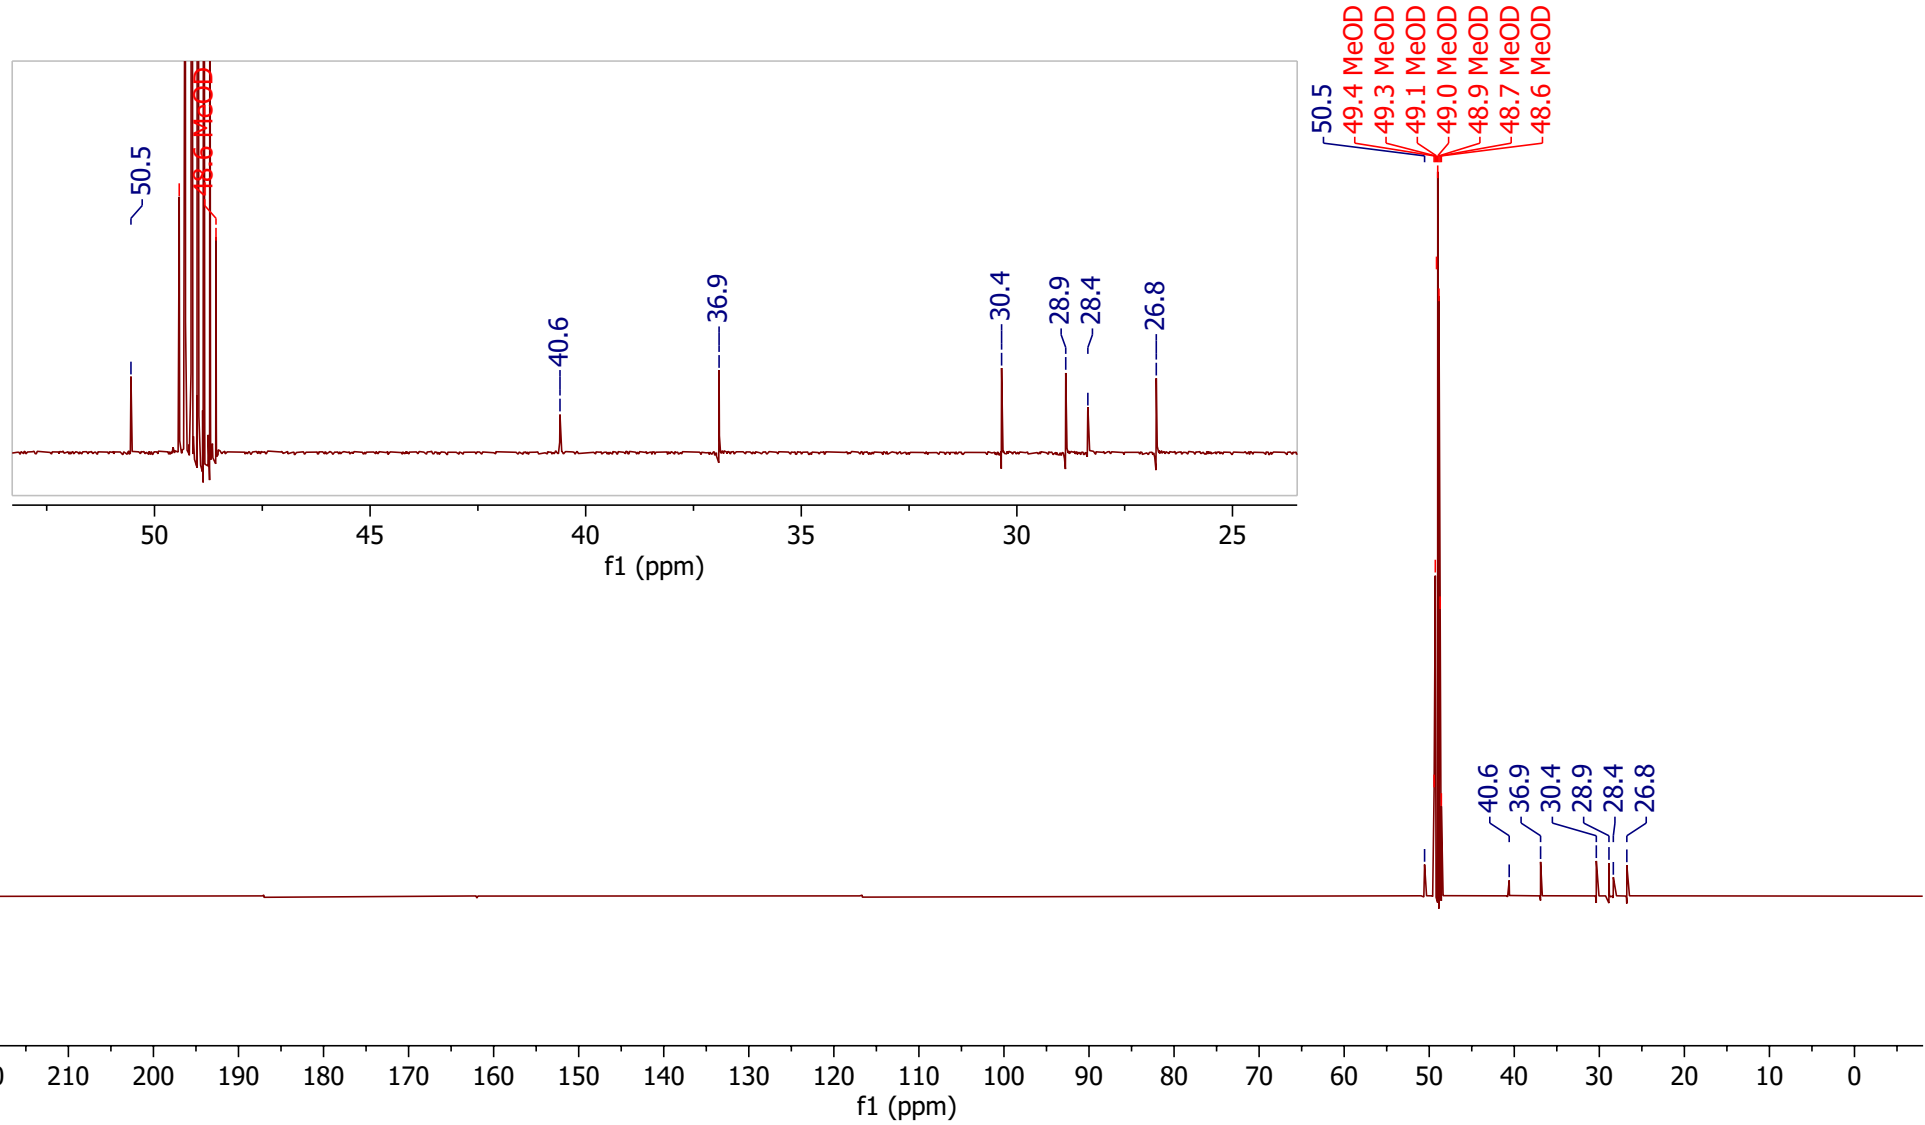

Compound 37  
<sup>1</sup>H NMR (600 MHz, CDCl<sub>3</sub>)

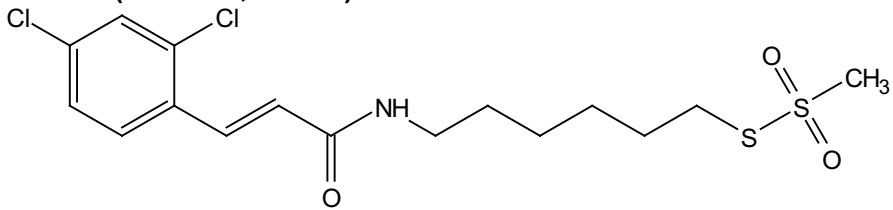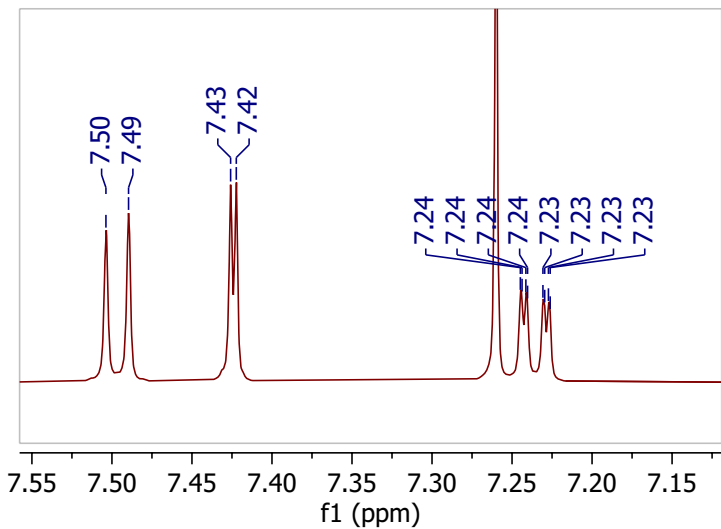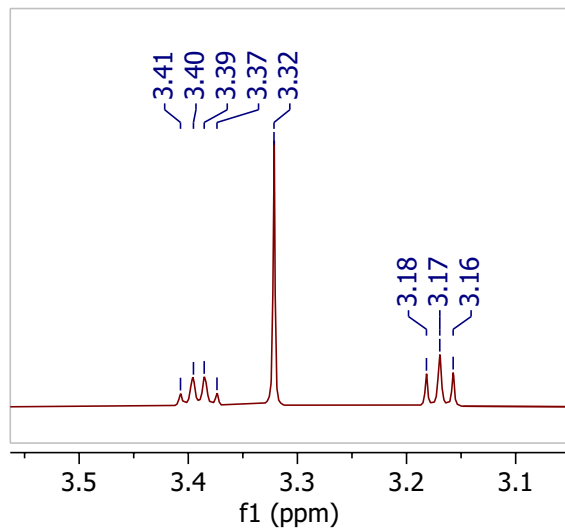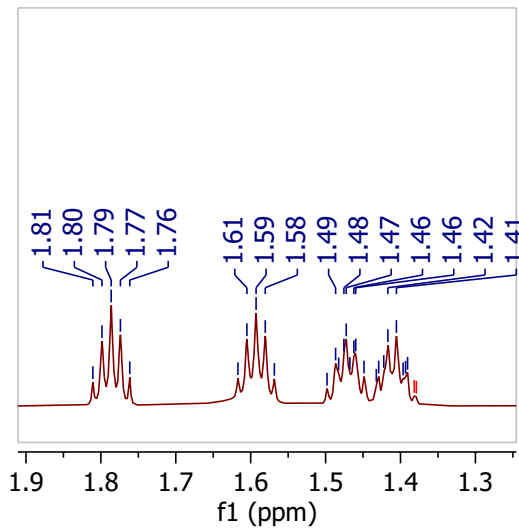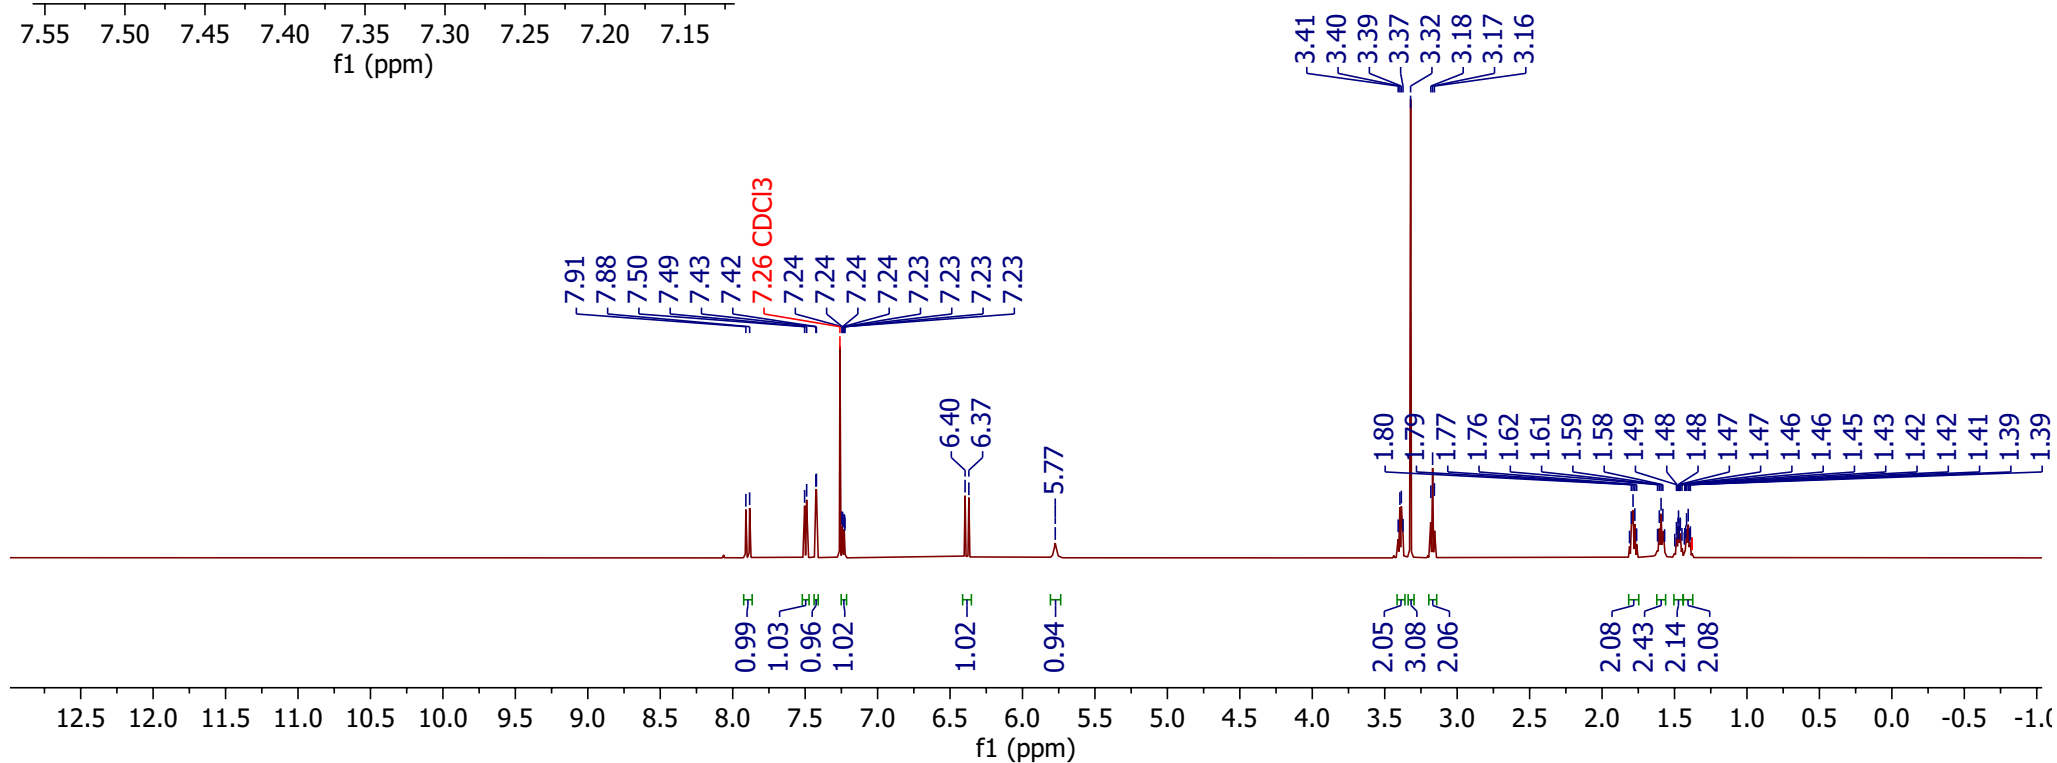

**Compound 37**  
**<sup>13</sup>C NMR (151 MHz, CDCl<sub>3</sub>)**

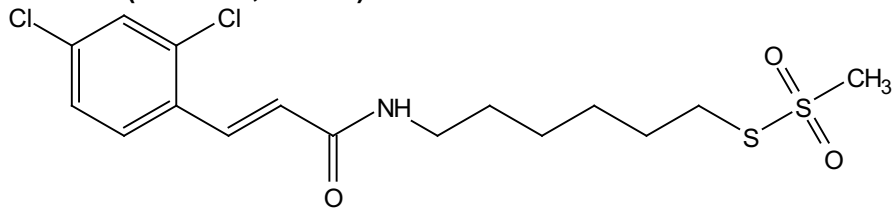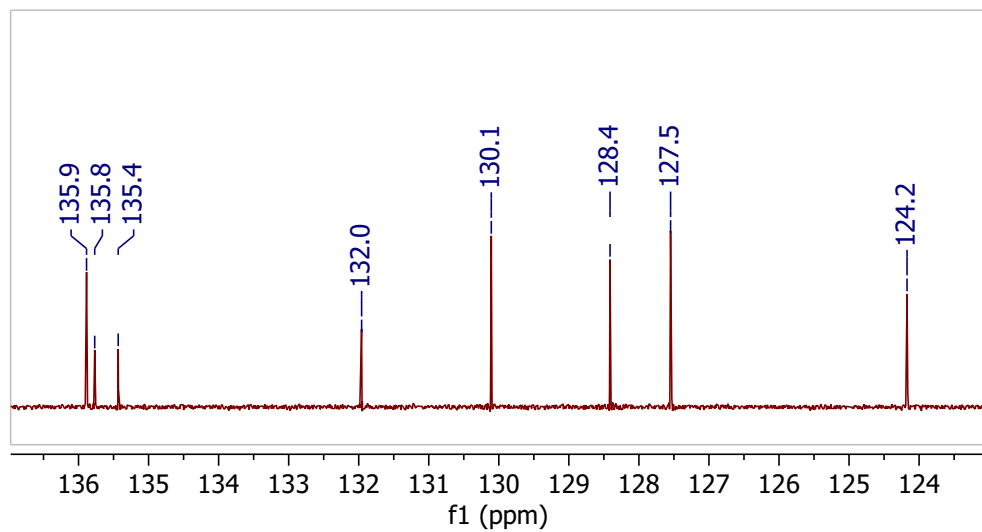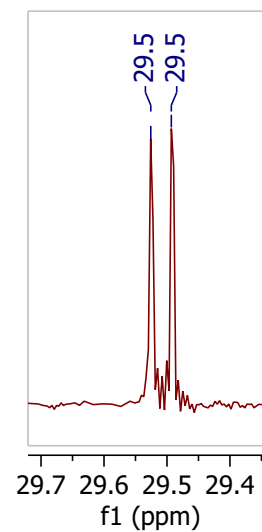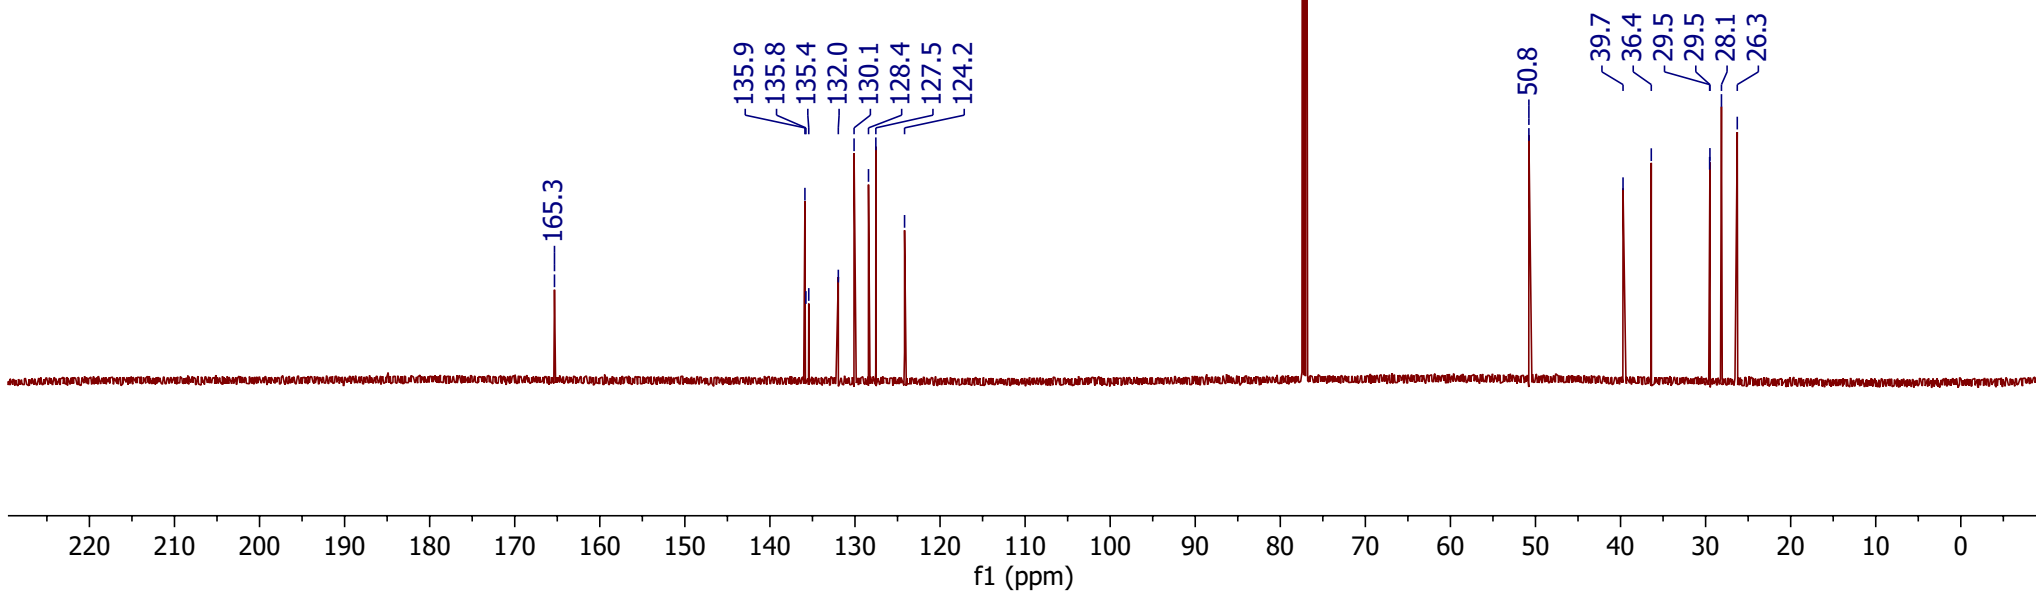

**Compound 38**  
**<sup>1</sup>H NMR (400 MHz, MeOD)**

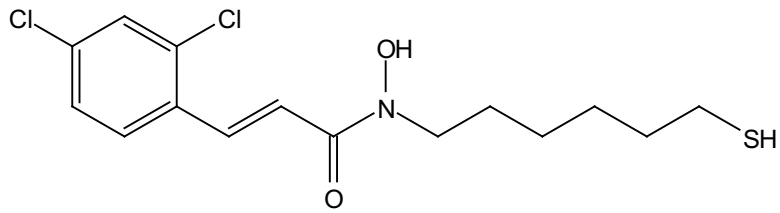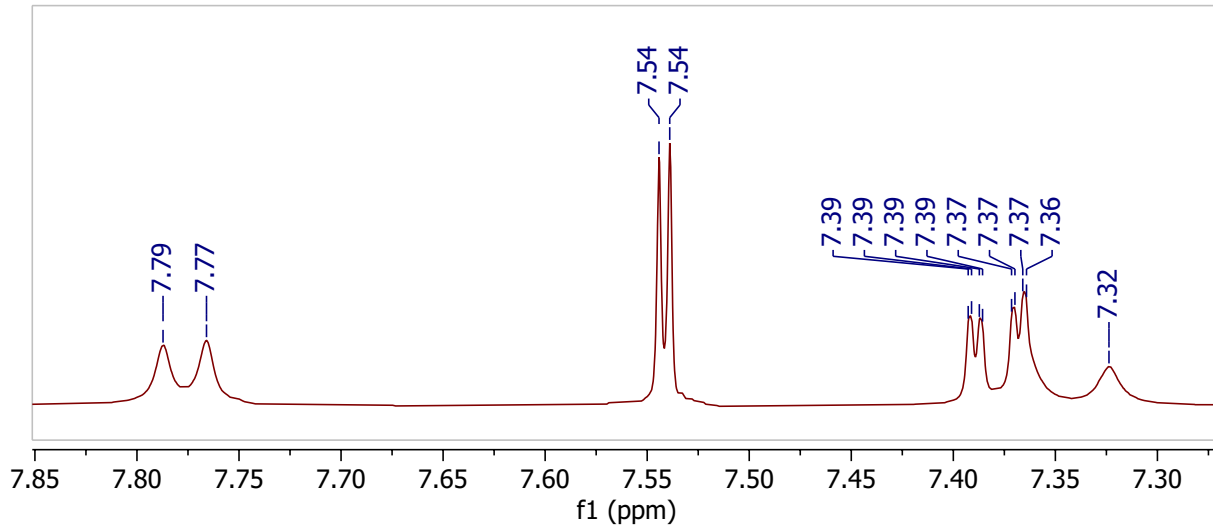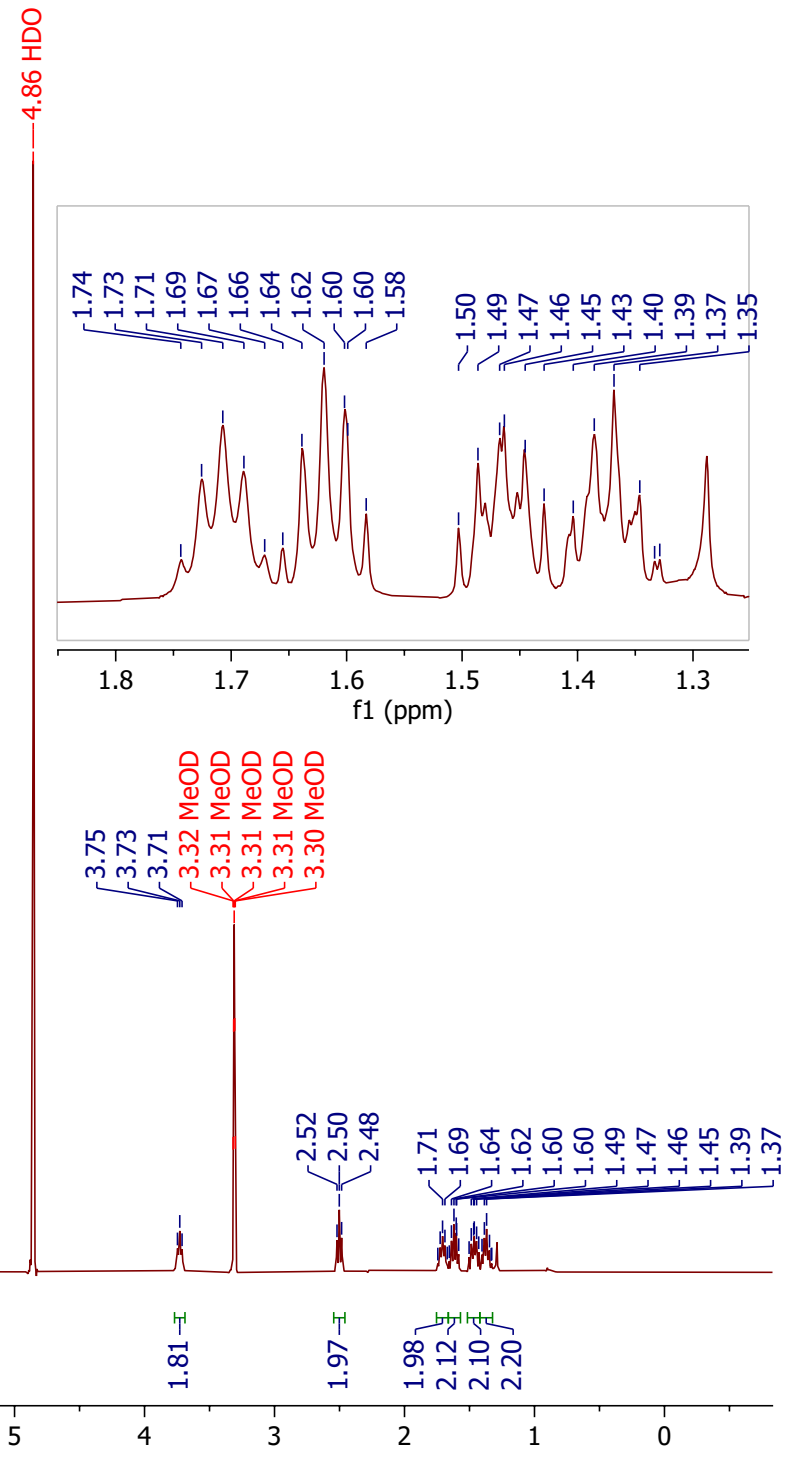

**Compound 38**  
**<sup>13</sup>C NMR (151 MHz, MeOD)**

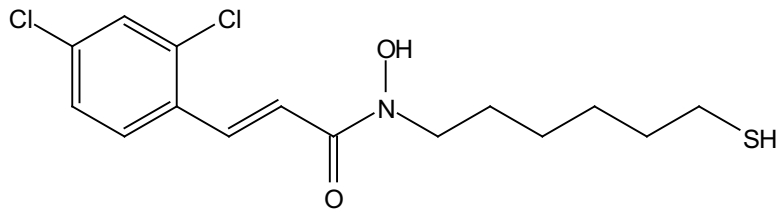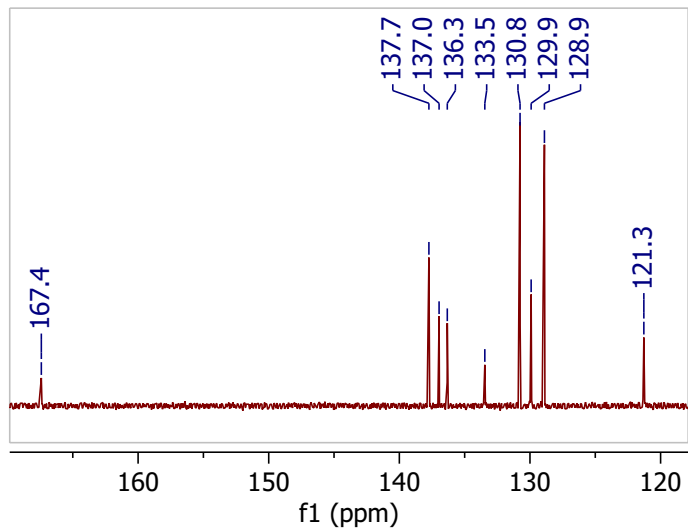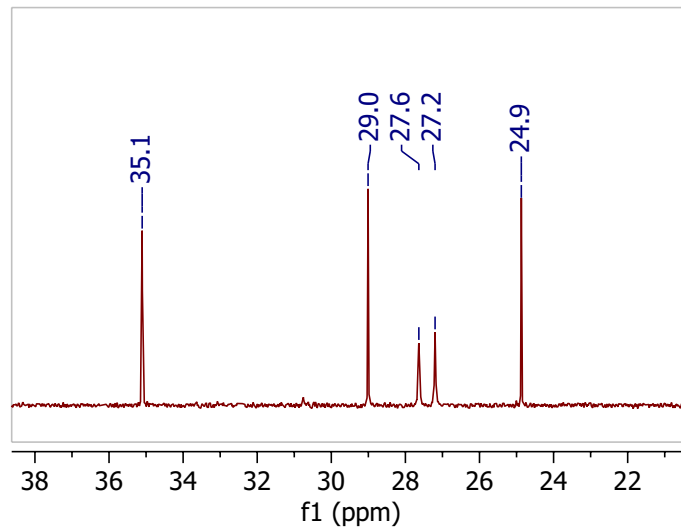

49.4 MeOD  
49.3 MeOD  
49.1 MeOD  
49.0 MeOD  
48.9 MeOD  
48.7 MeOD  
48.6 MeOD

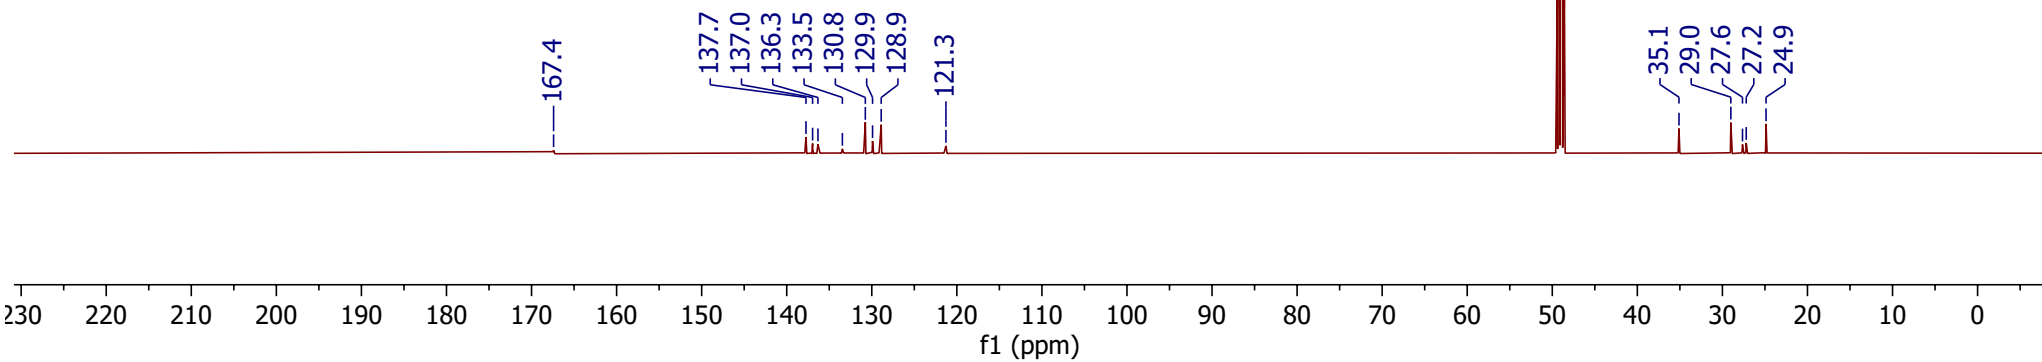

Compound 43  
<sup>1</sup>H NMR (500 MHz, DMSO-d6)

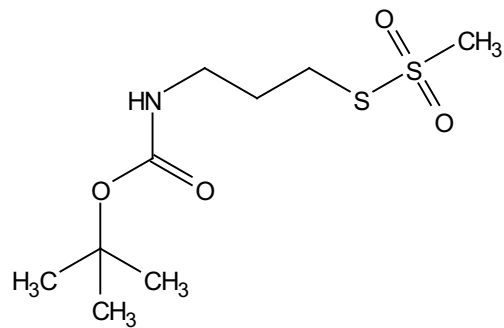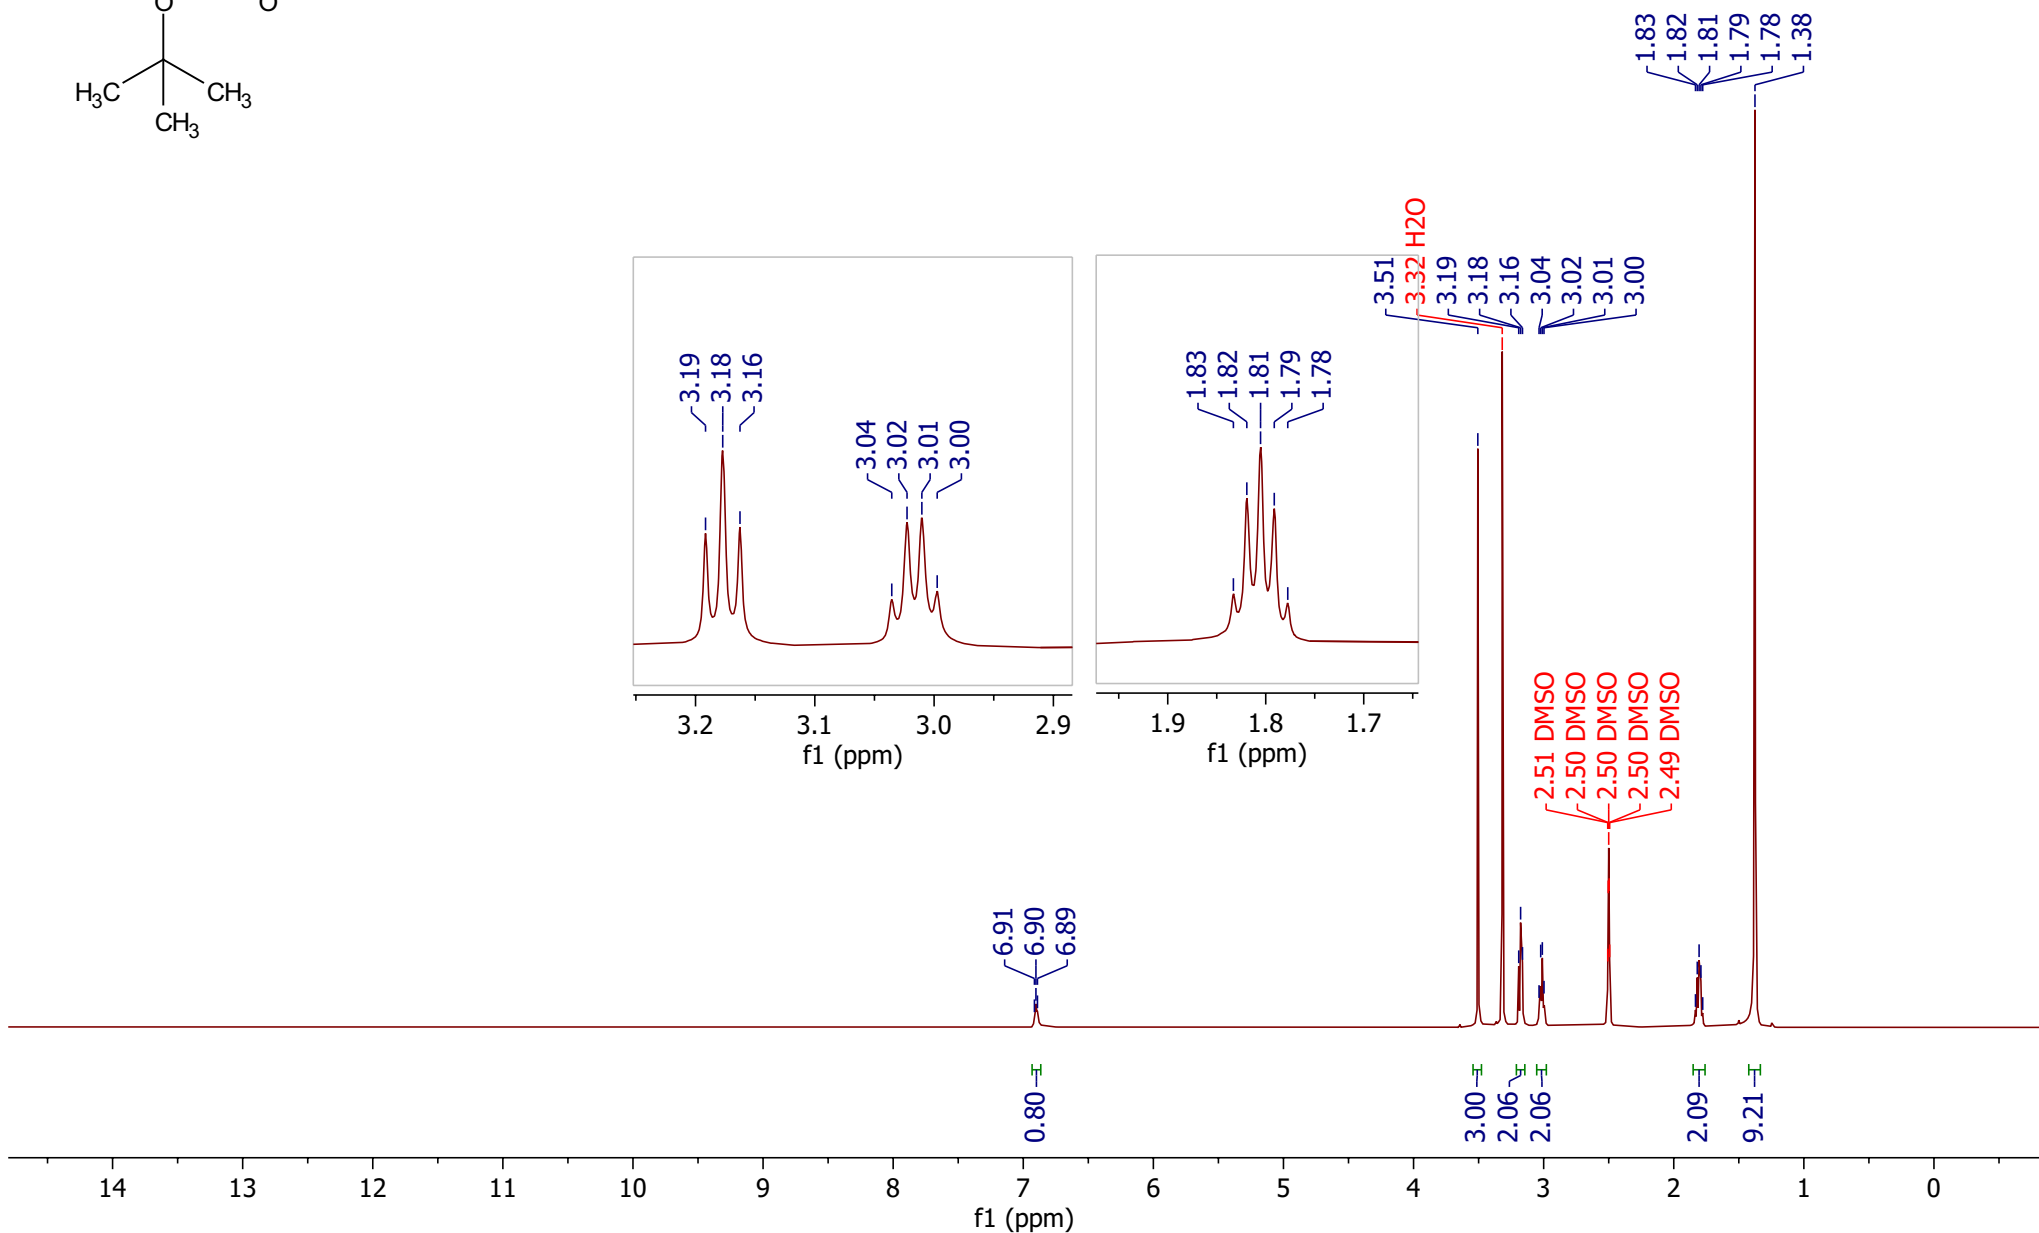



Compound 43  
<sup>1</sup>H NMR (151 MHz, DMSO-d6)

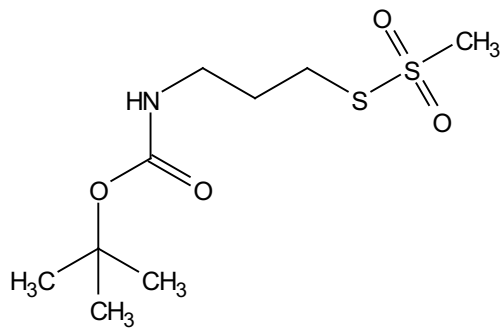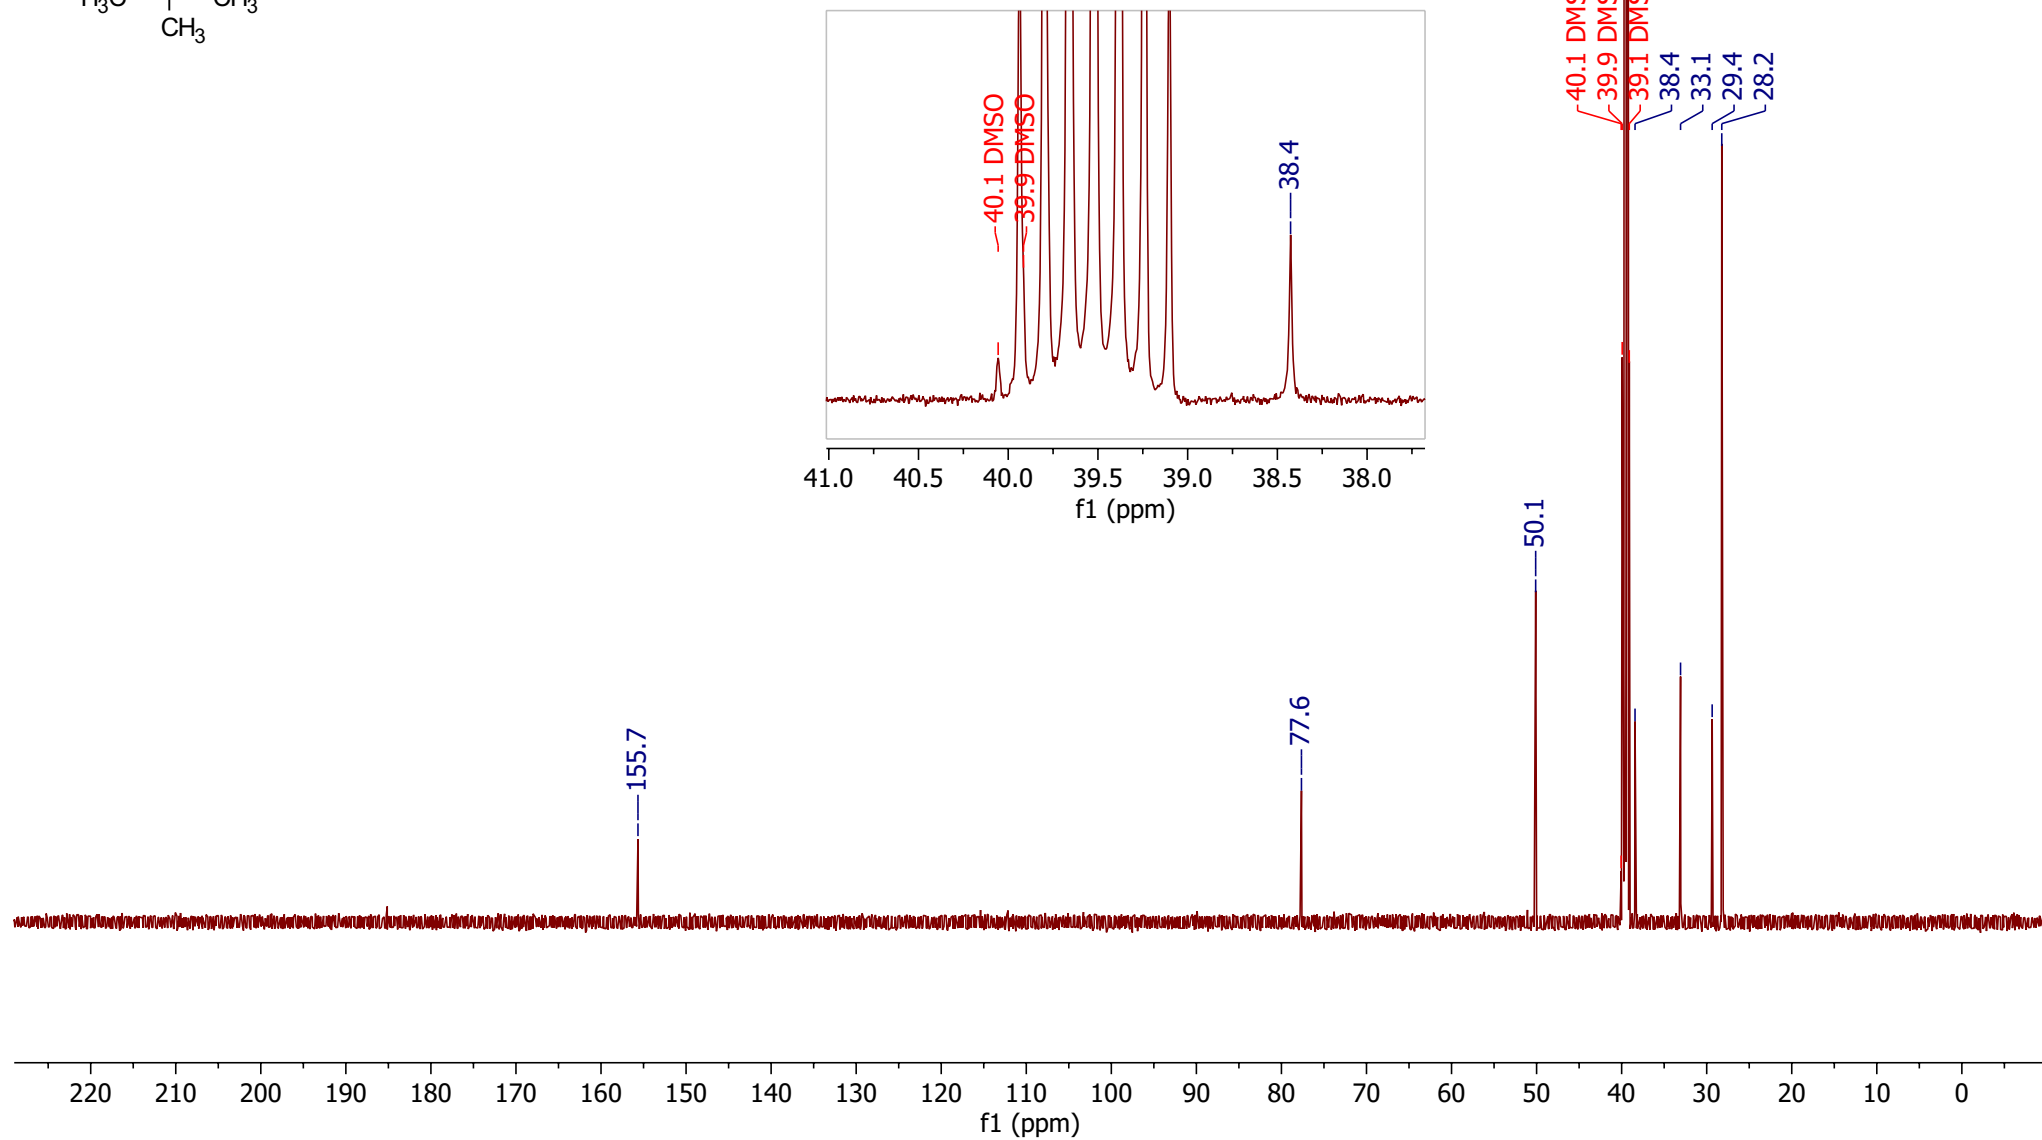

Compound 44  
<sup>1</sup>H NMR (600 MHz, CDCl<sub>3</sub>)

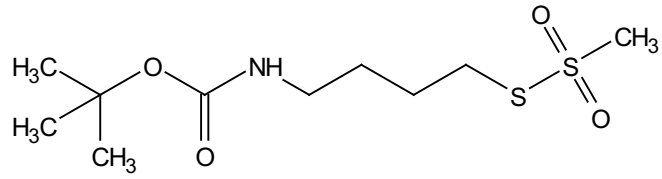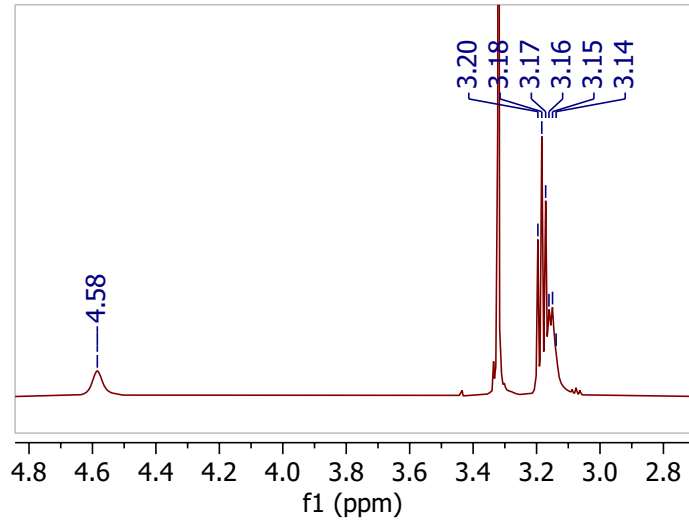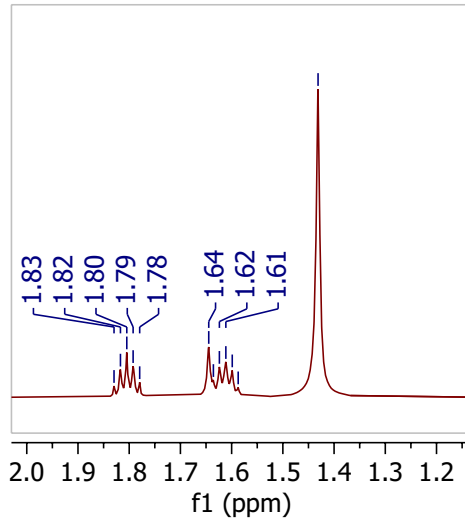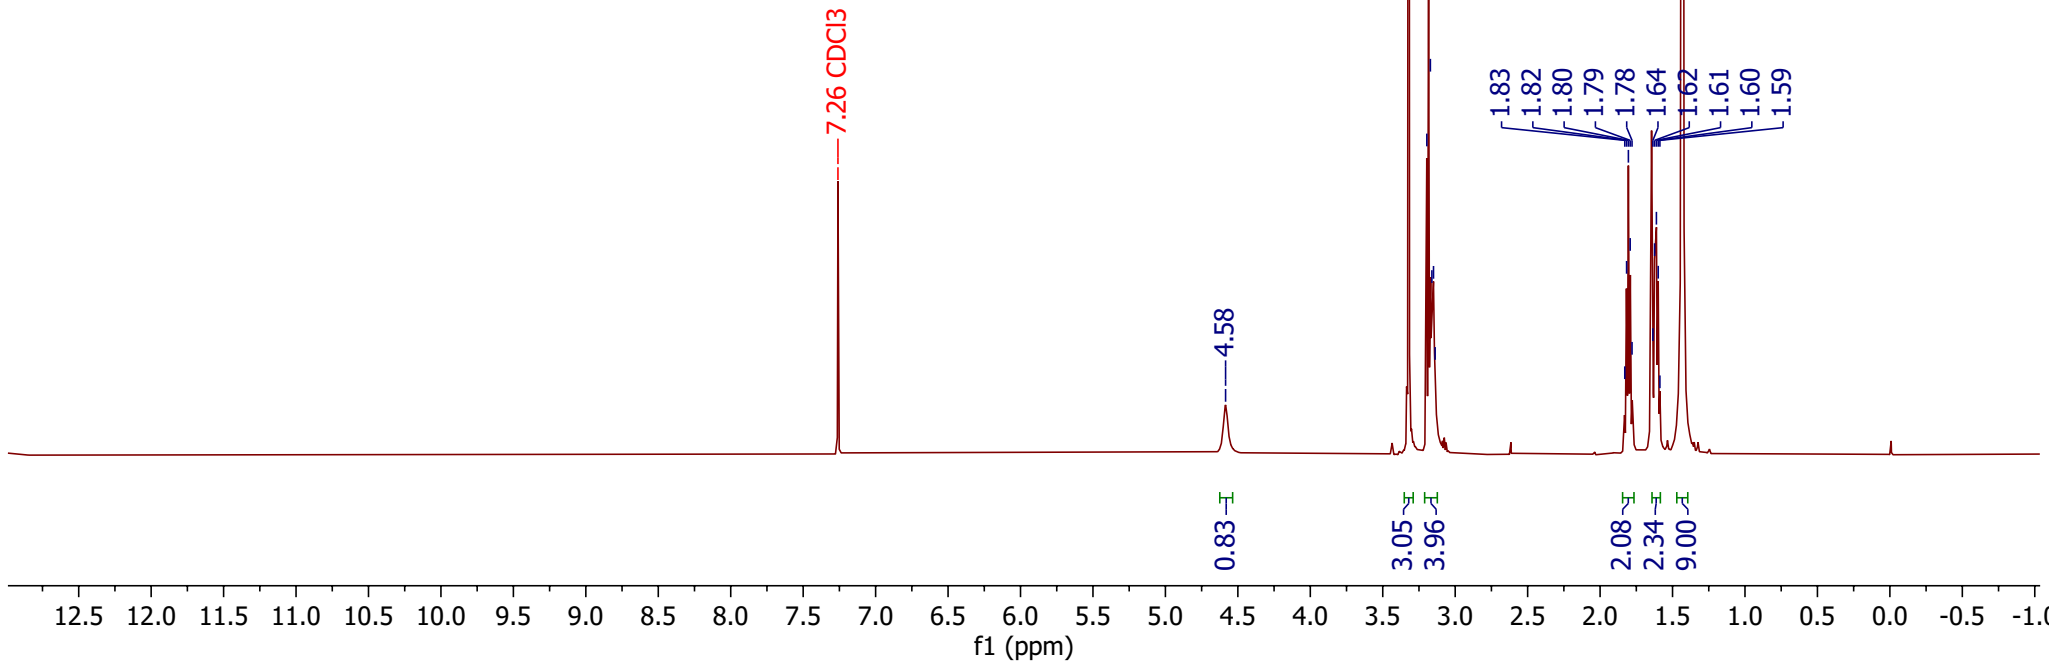

**Compound 44**  
**<sup>13</sup>C NMR (151 MHz, CDCl<sub>3</sub>)**

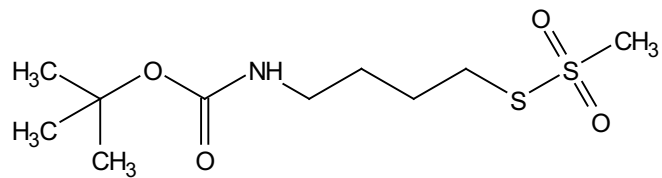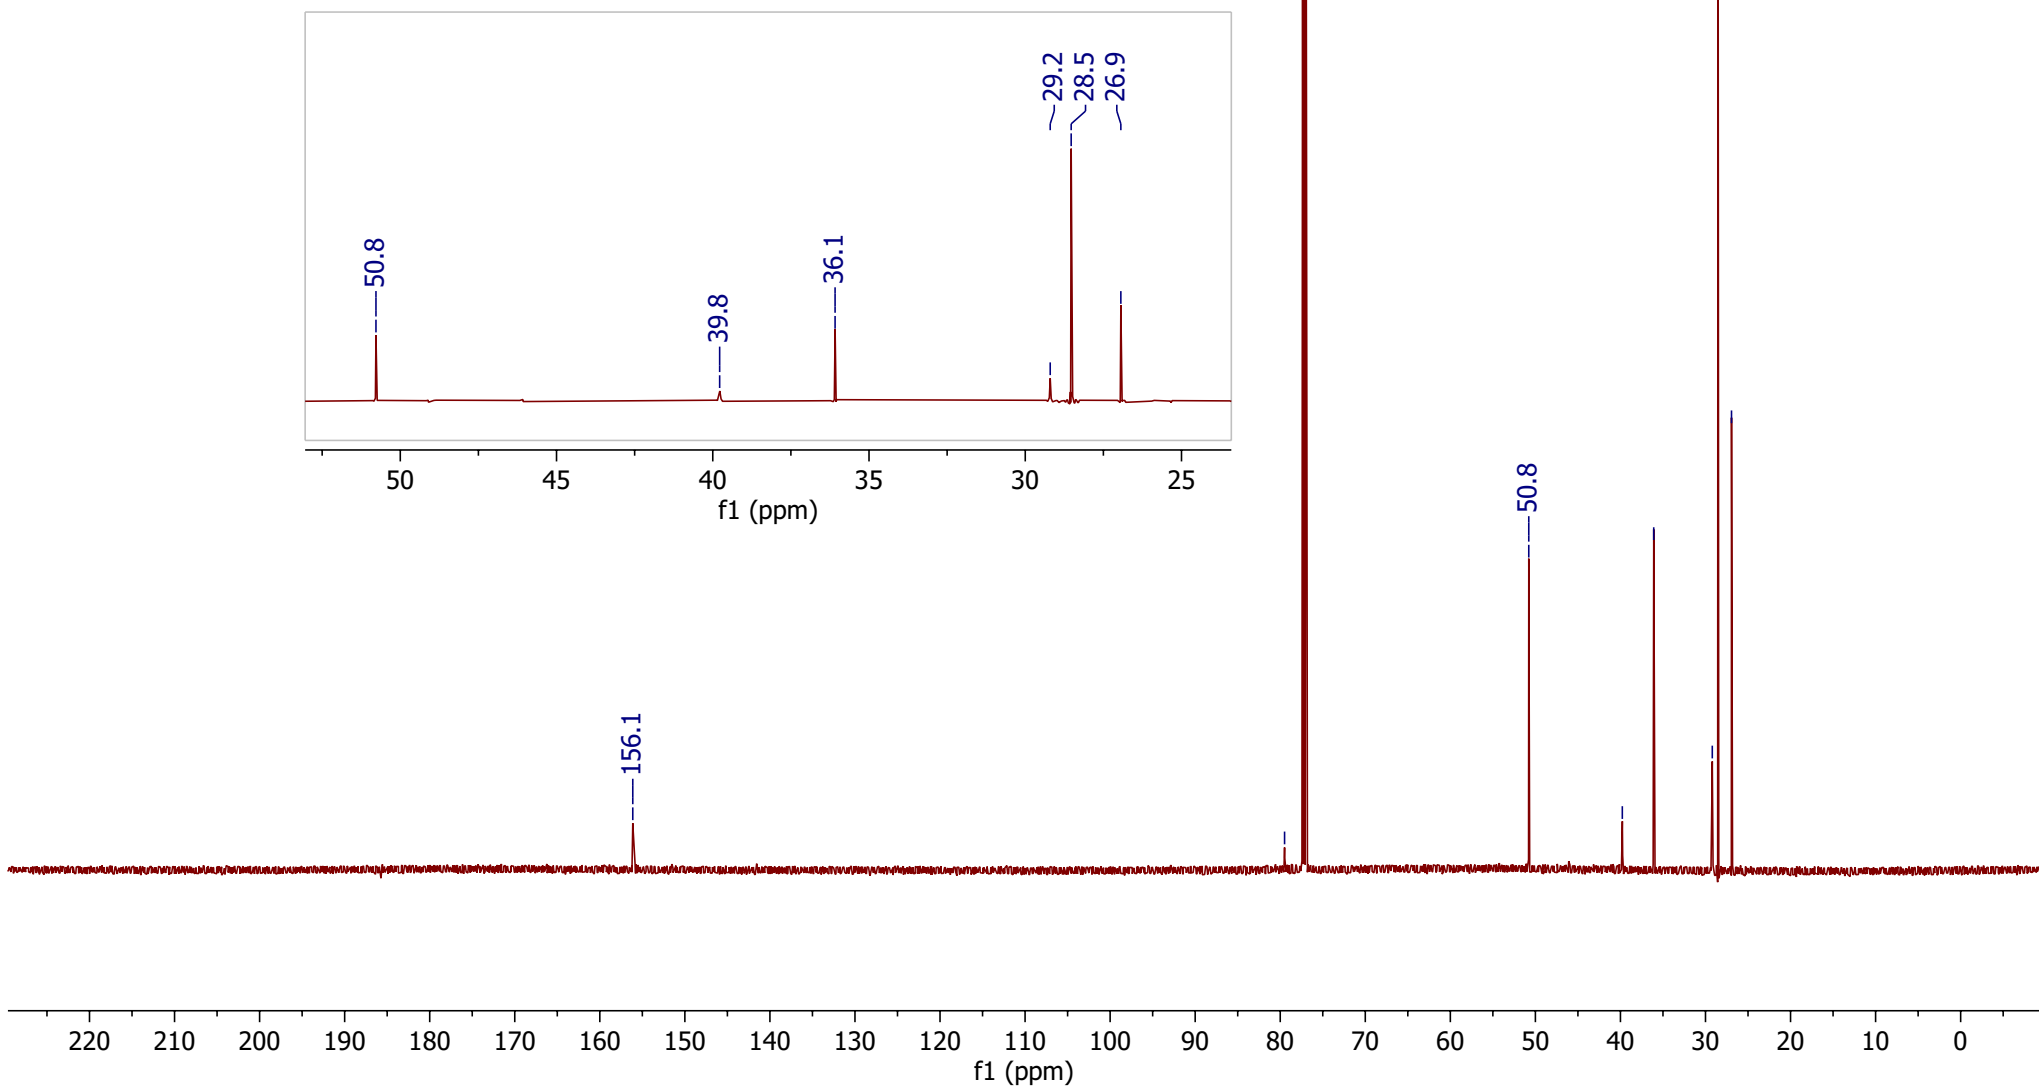

Compound 45  
<sup>1</sup>H NMR (600 MHz, CDCl<sub>3</sub>)

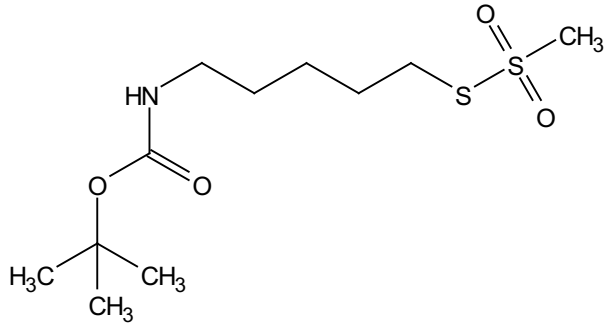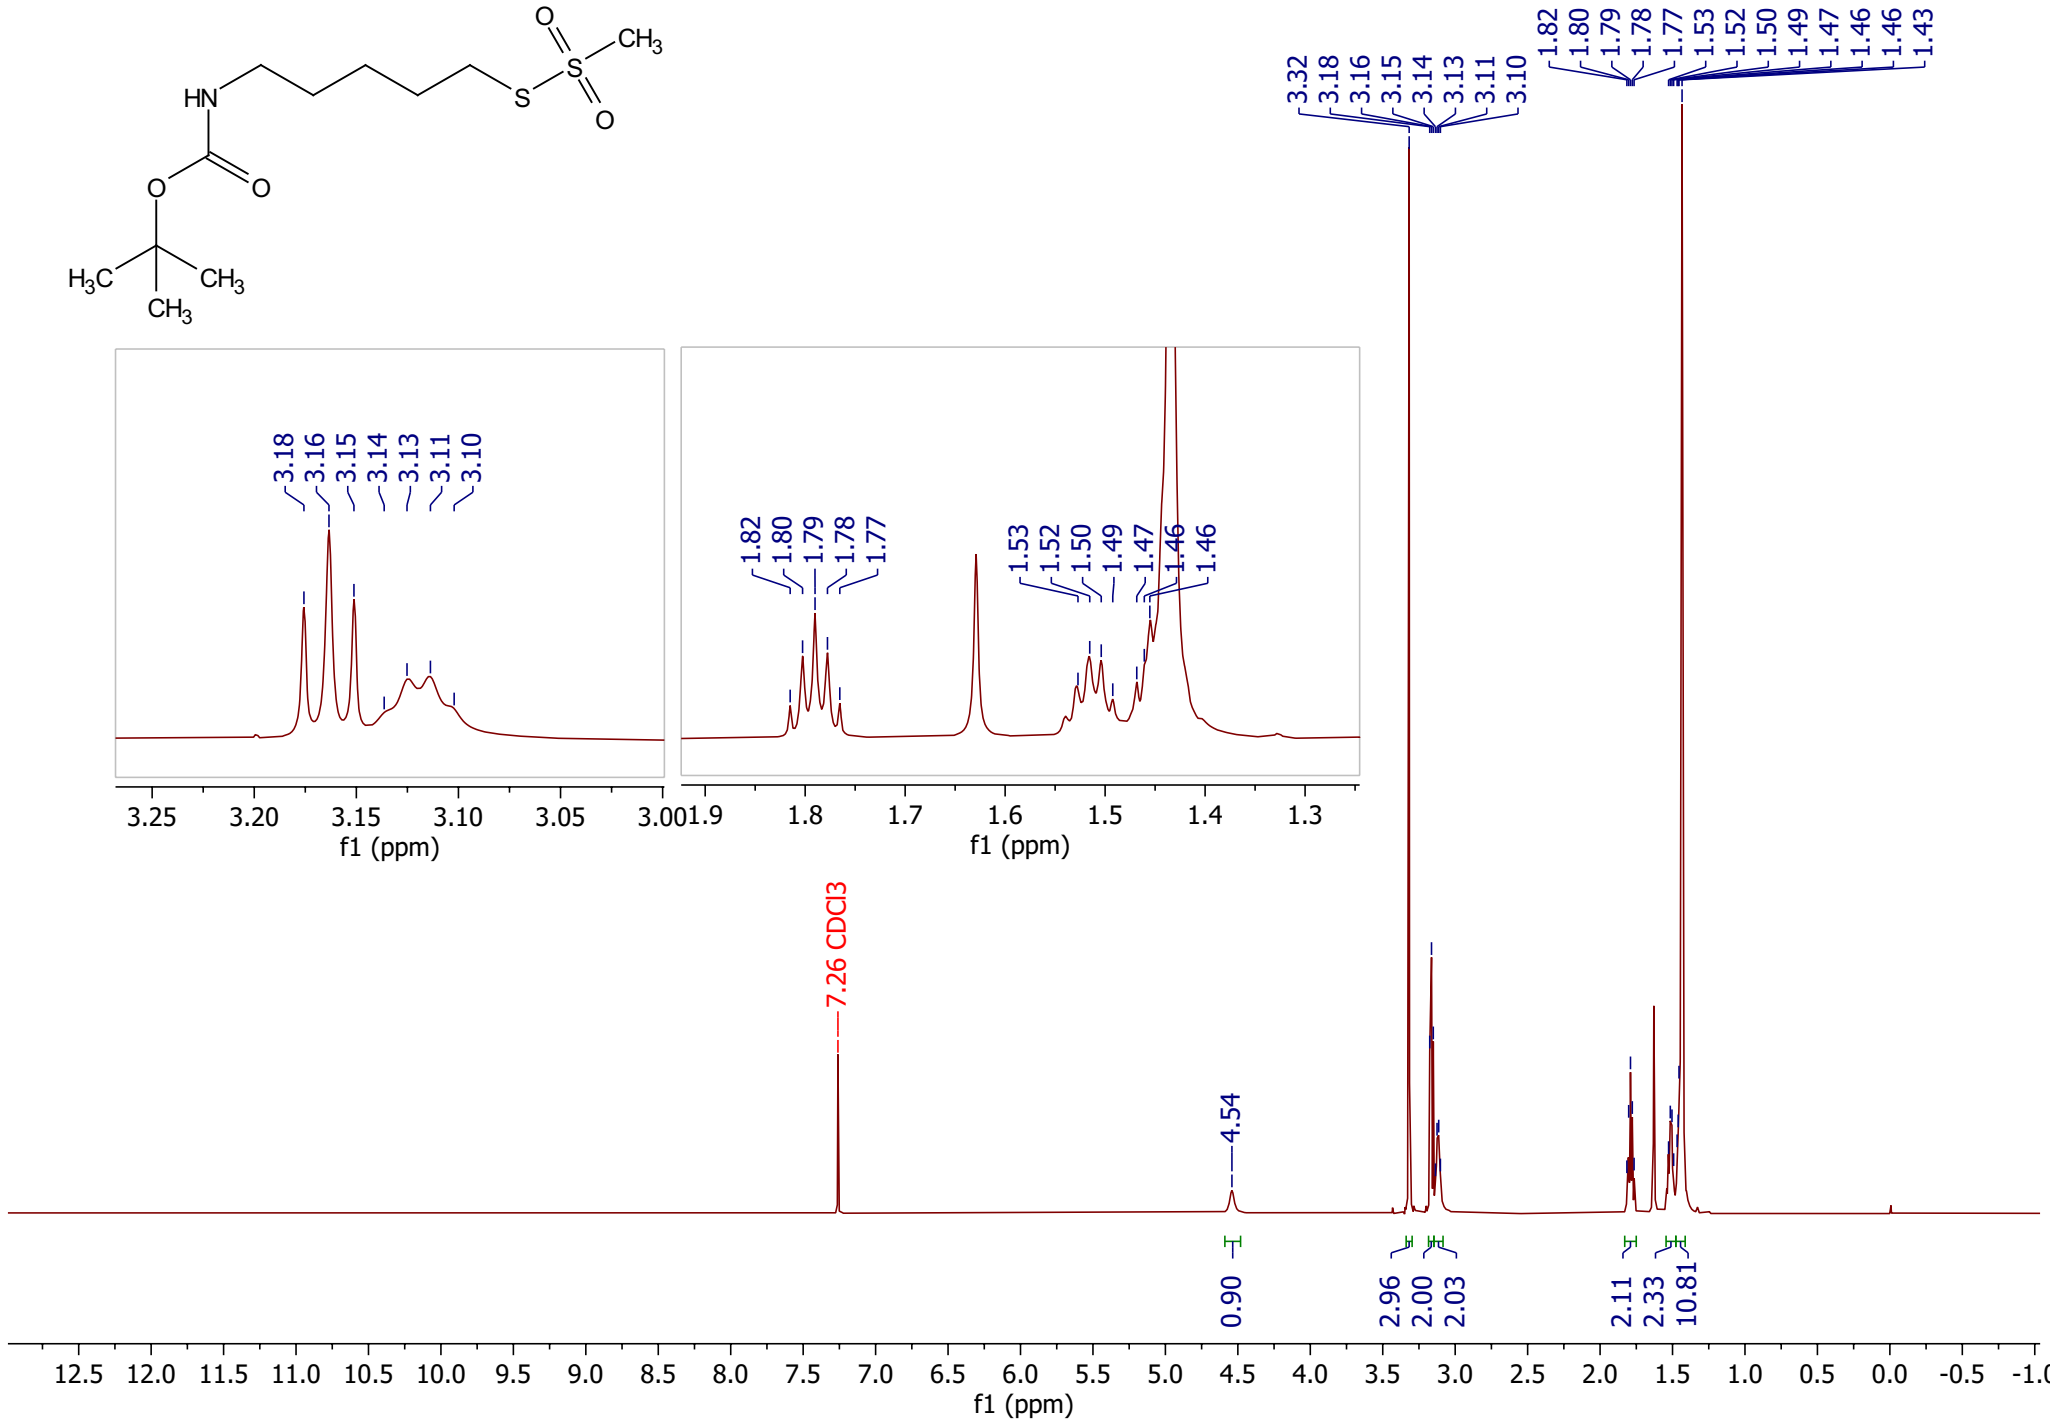

Compound 45  
<sup>13</sup>C NMR (151 MHz, CDCl<sub>3</sub>)

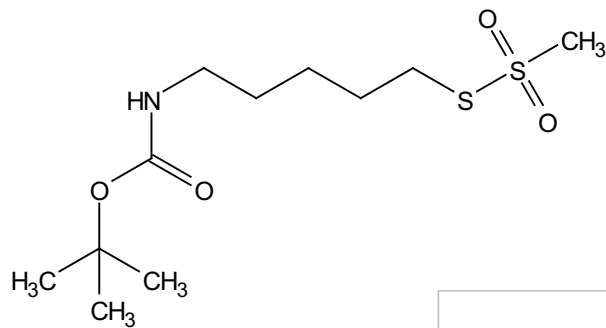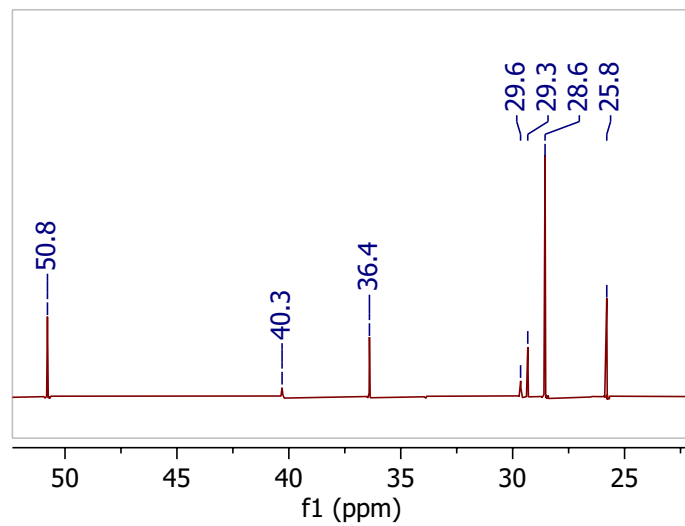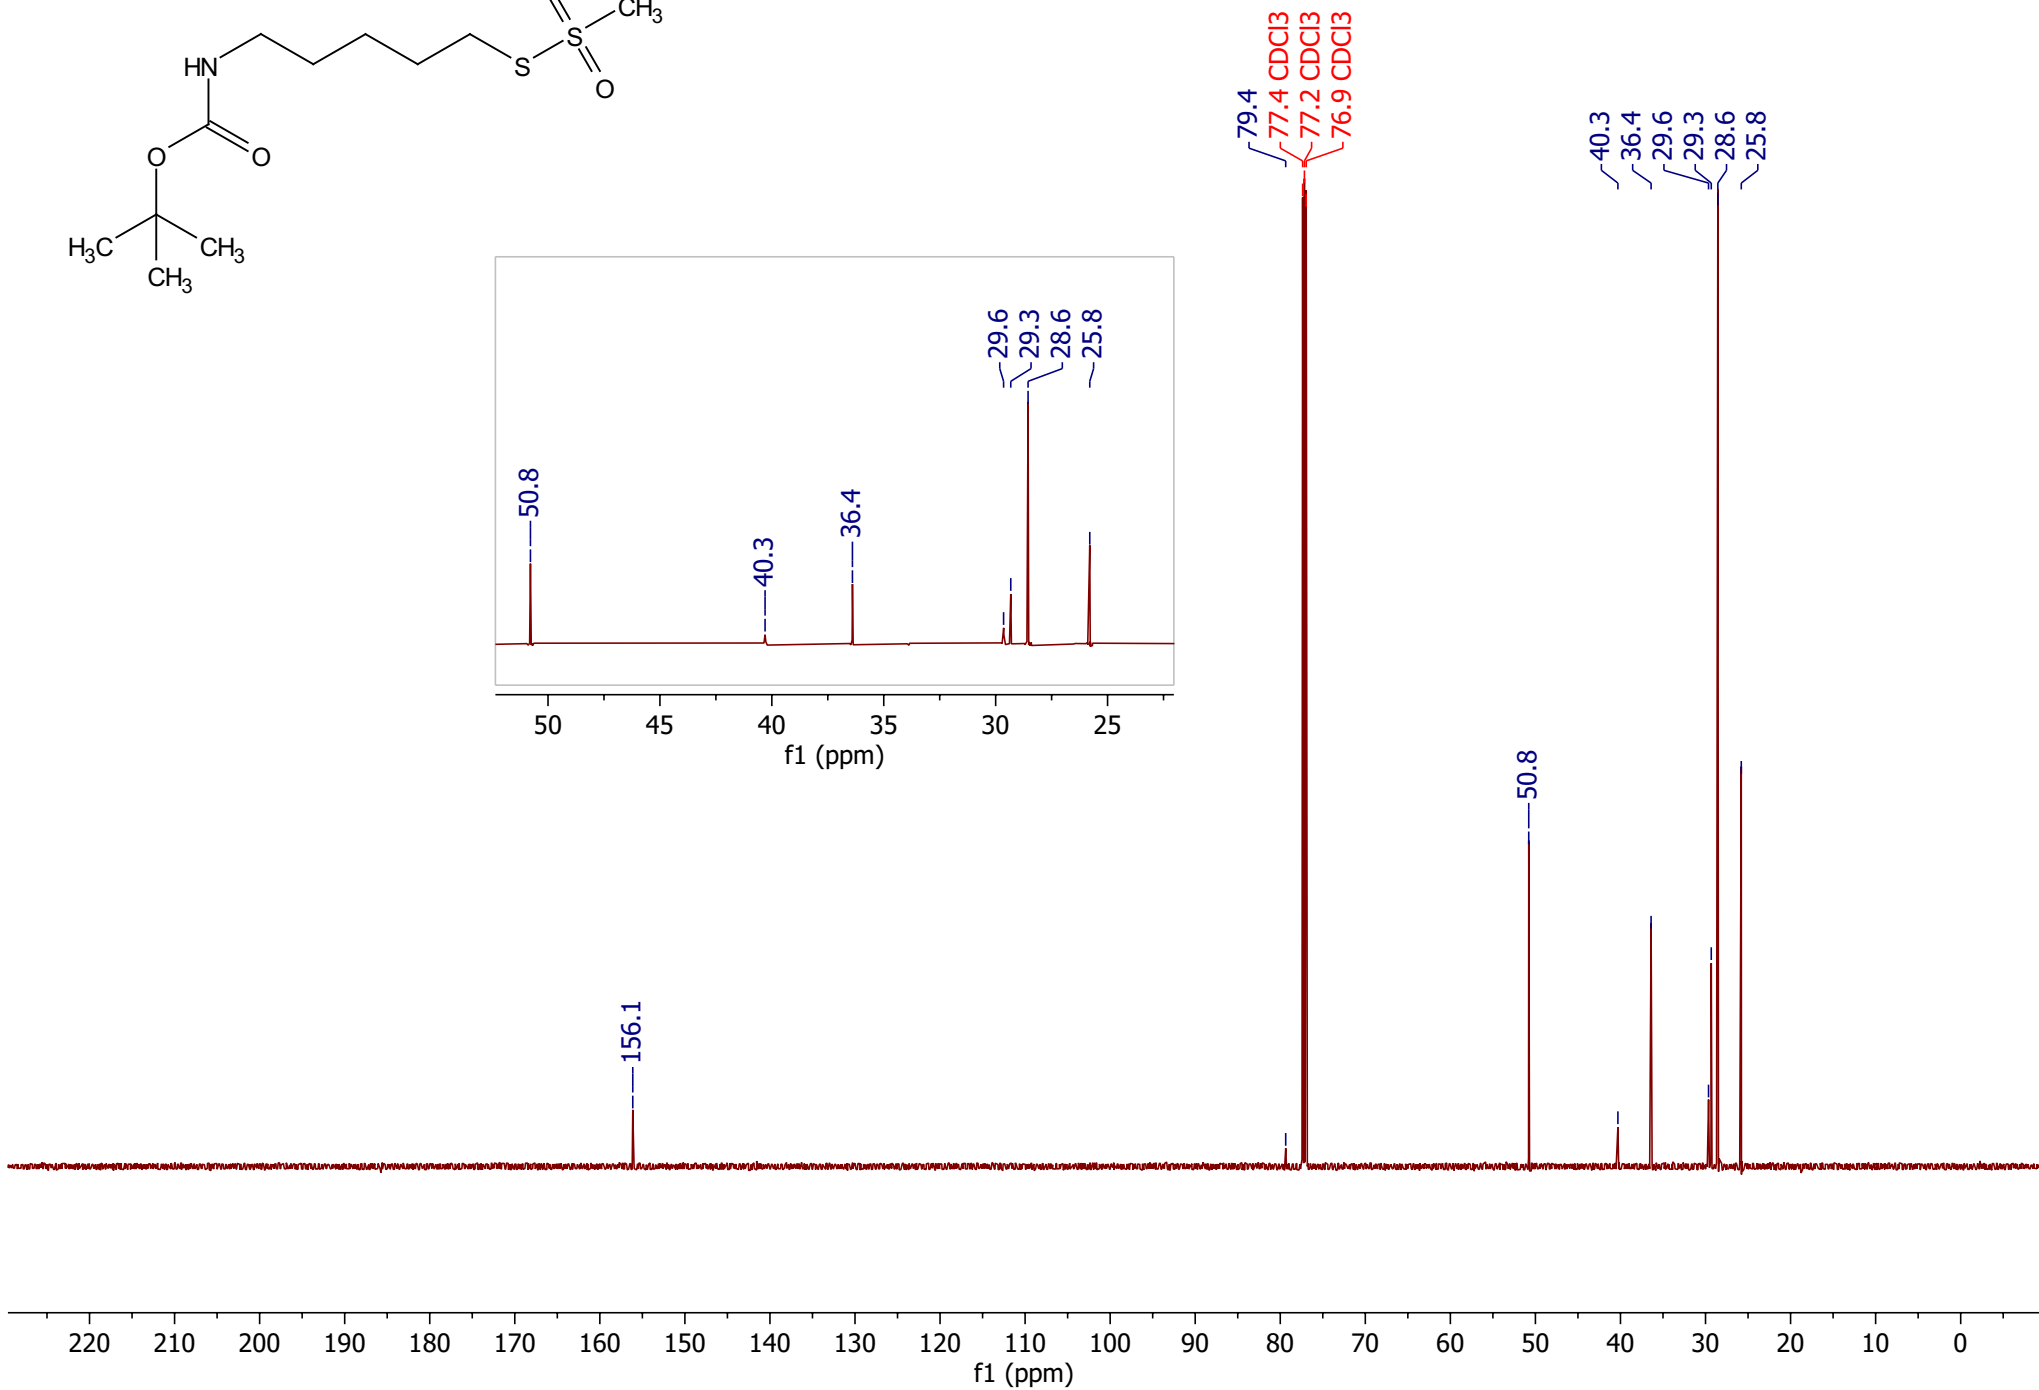

Compound 4  
1H NMR (500 MHz, DMSO-d6)

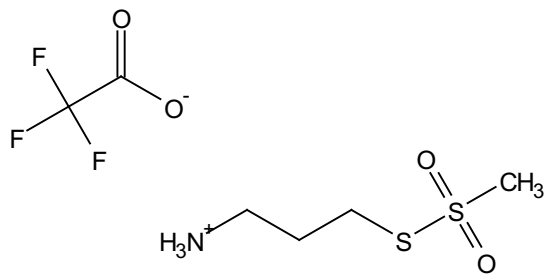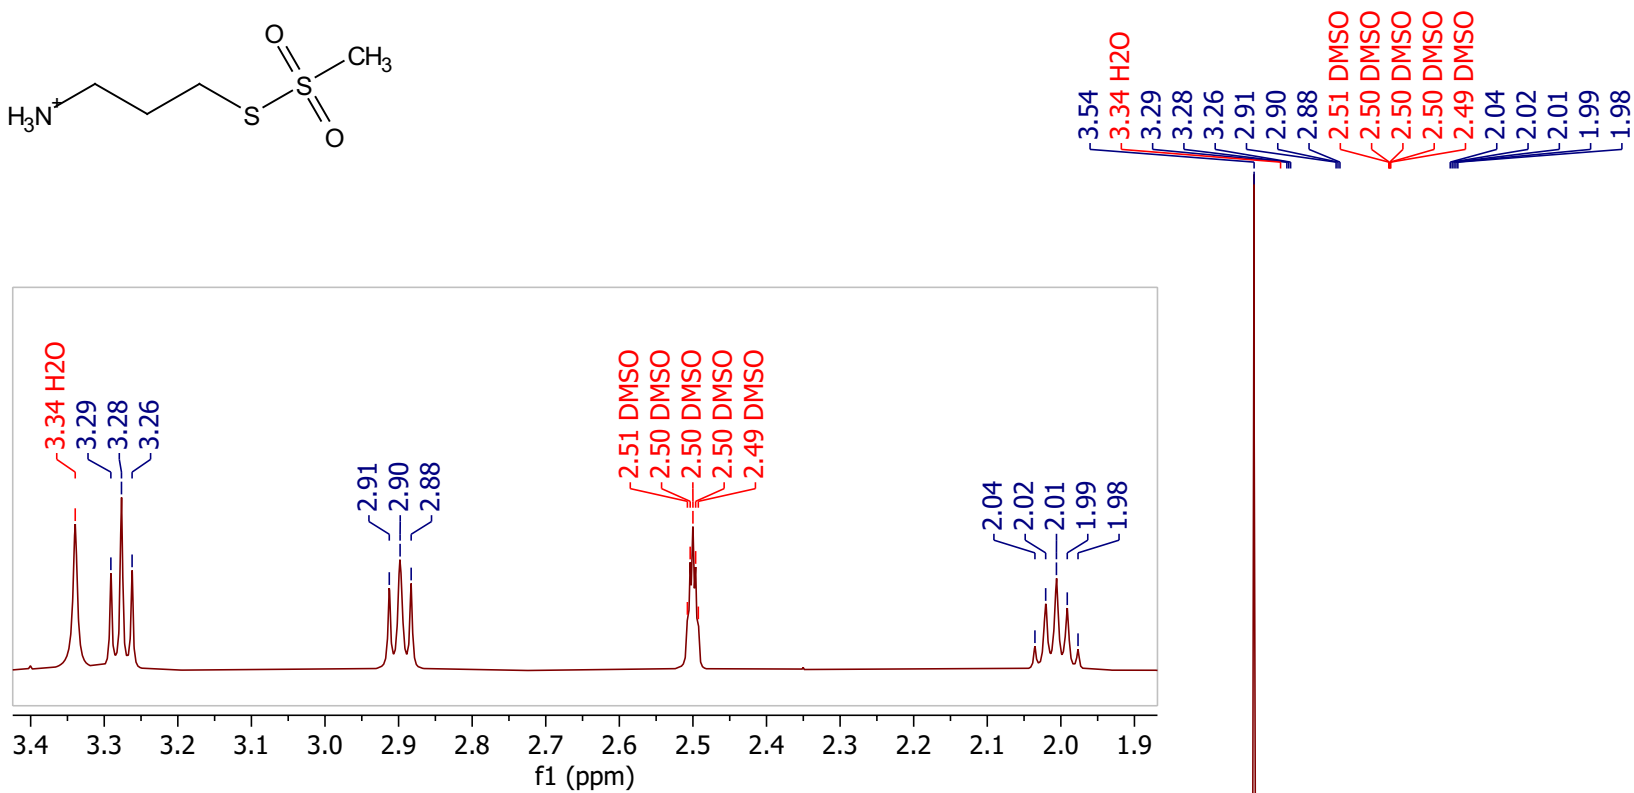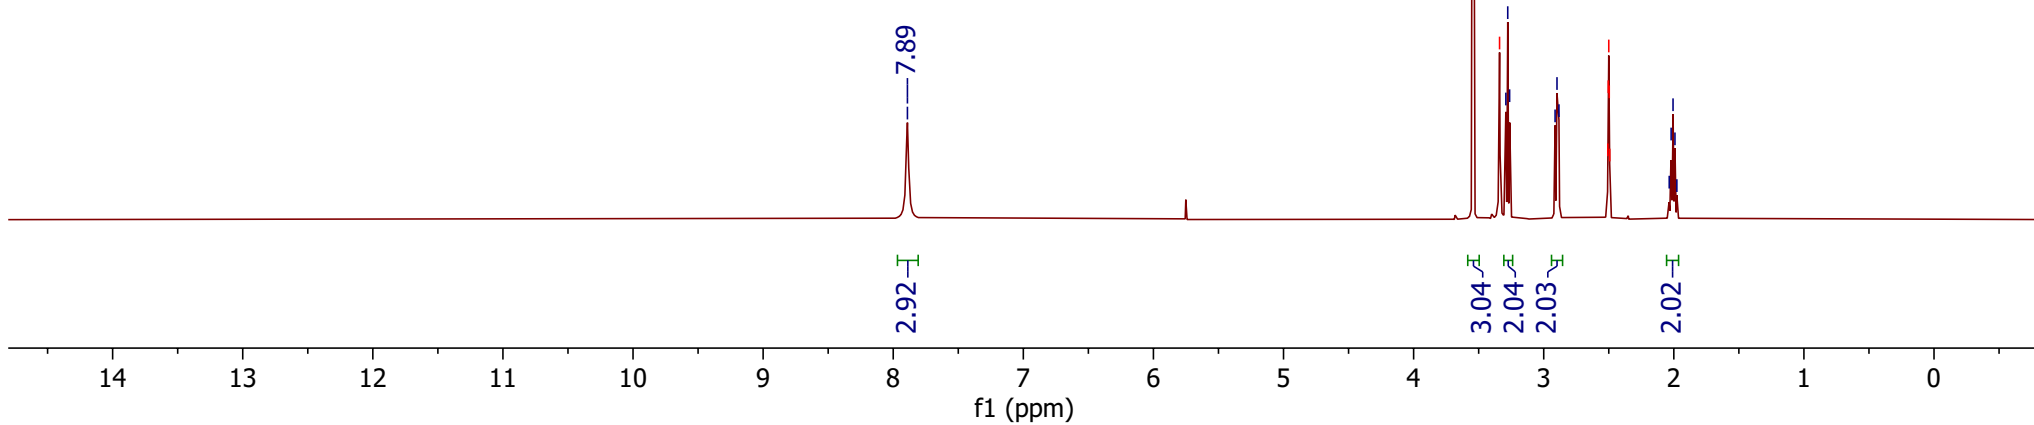

**Compound 4**  
**<sup>1</sup>H NMR (151 MHz, DMSO-d6)**

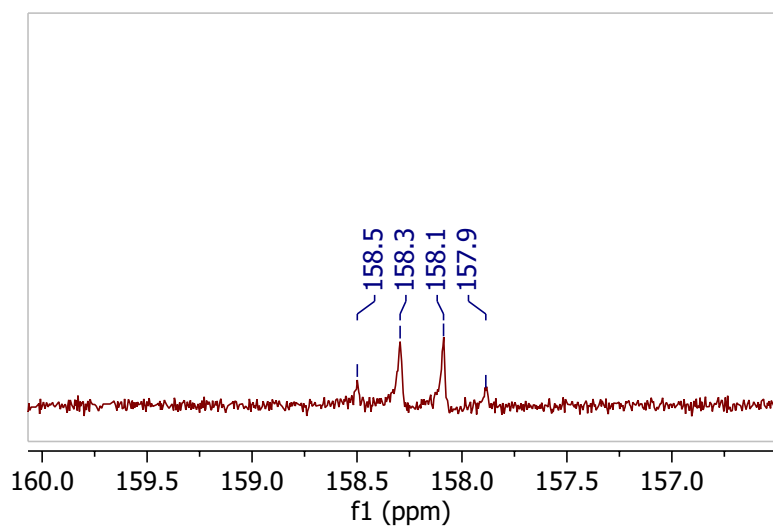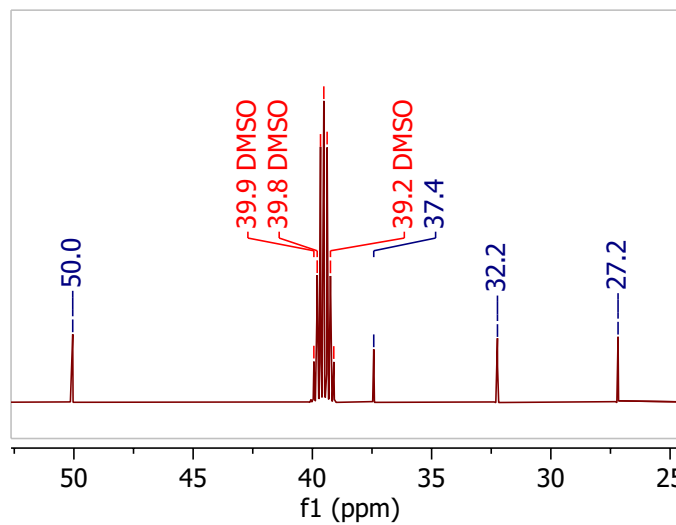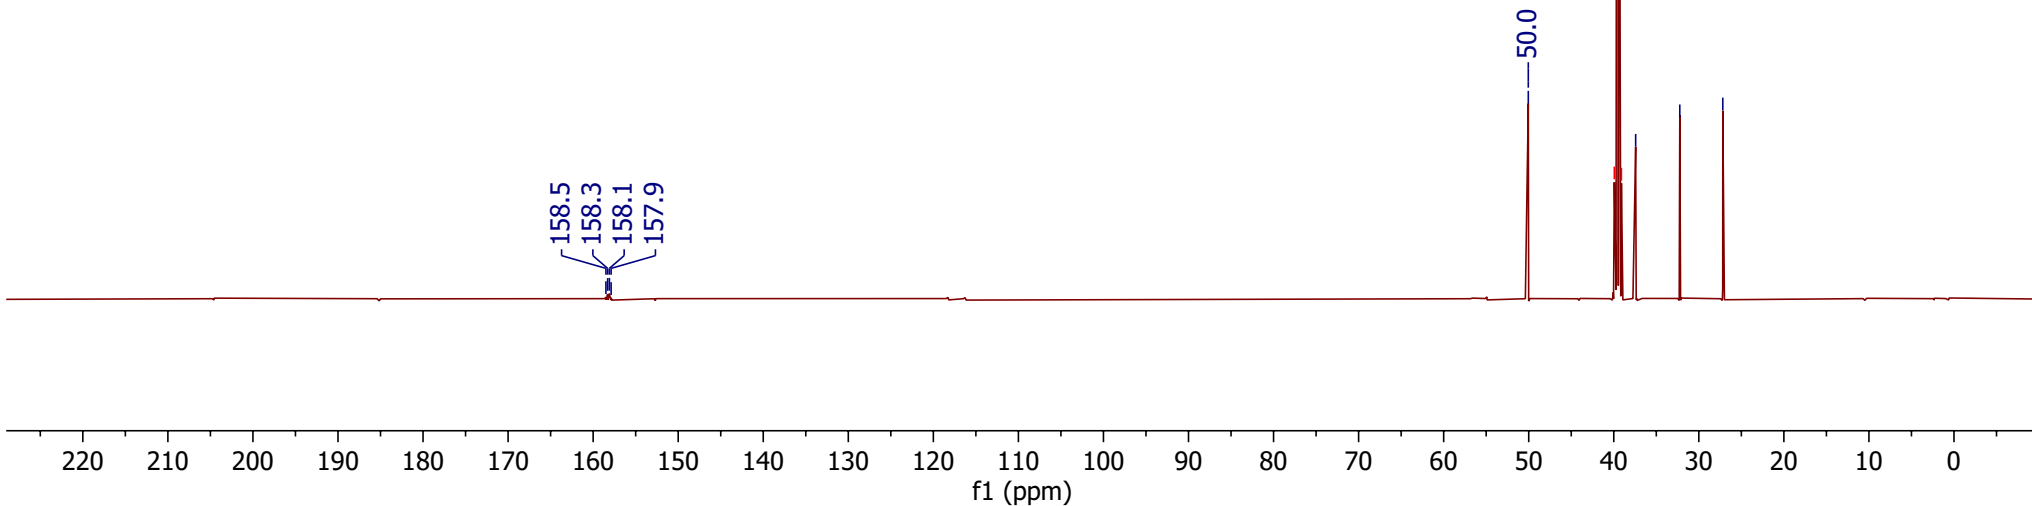

Compound 46  
<sup>1</sup>H NMR (600 MHz, MeOD-d4)

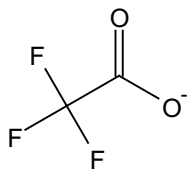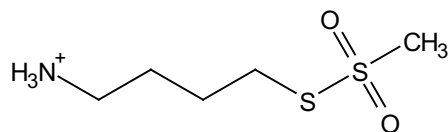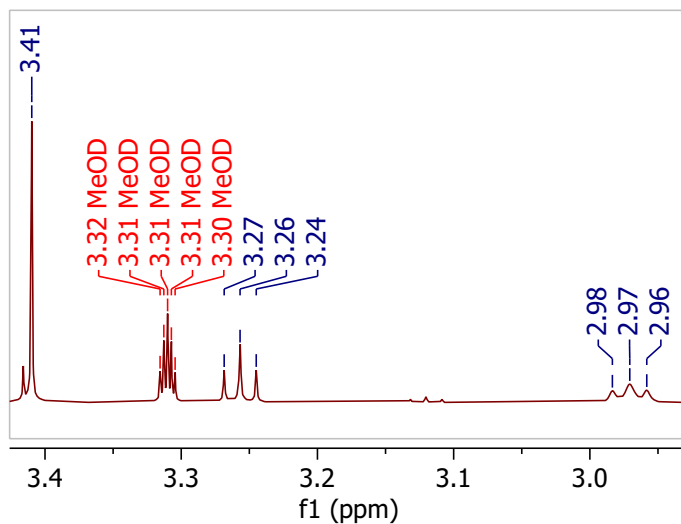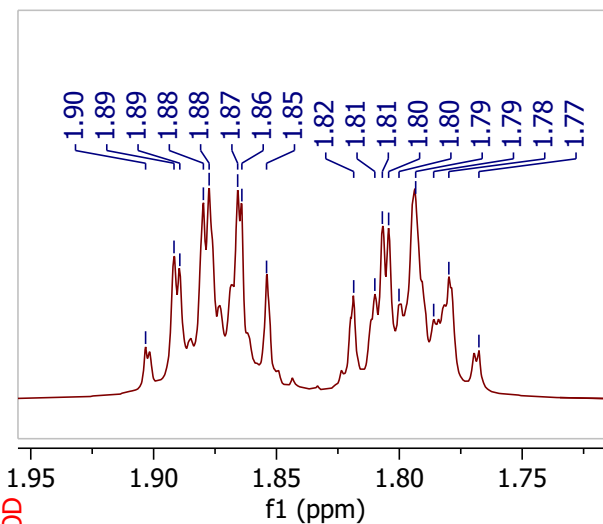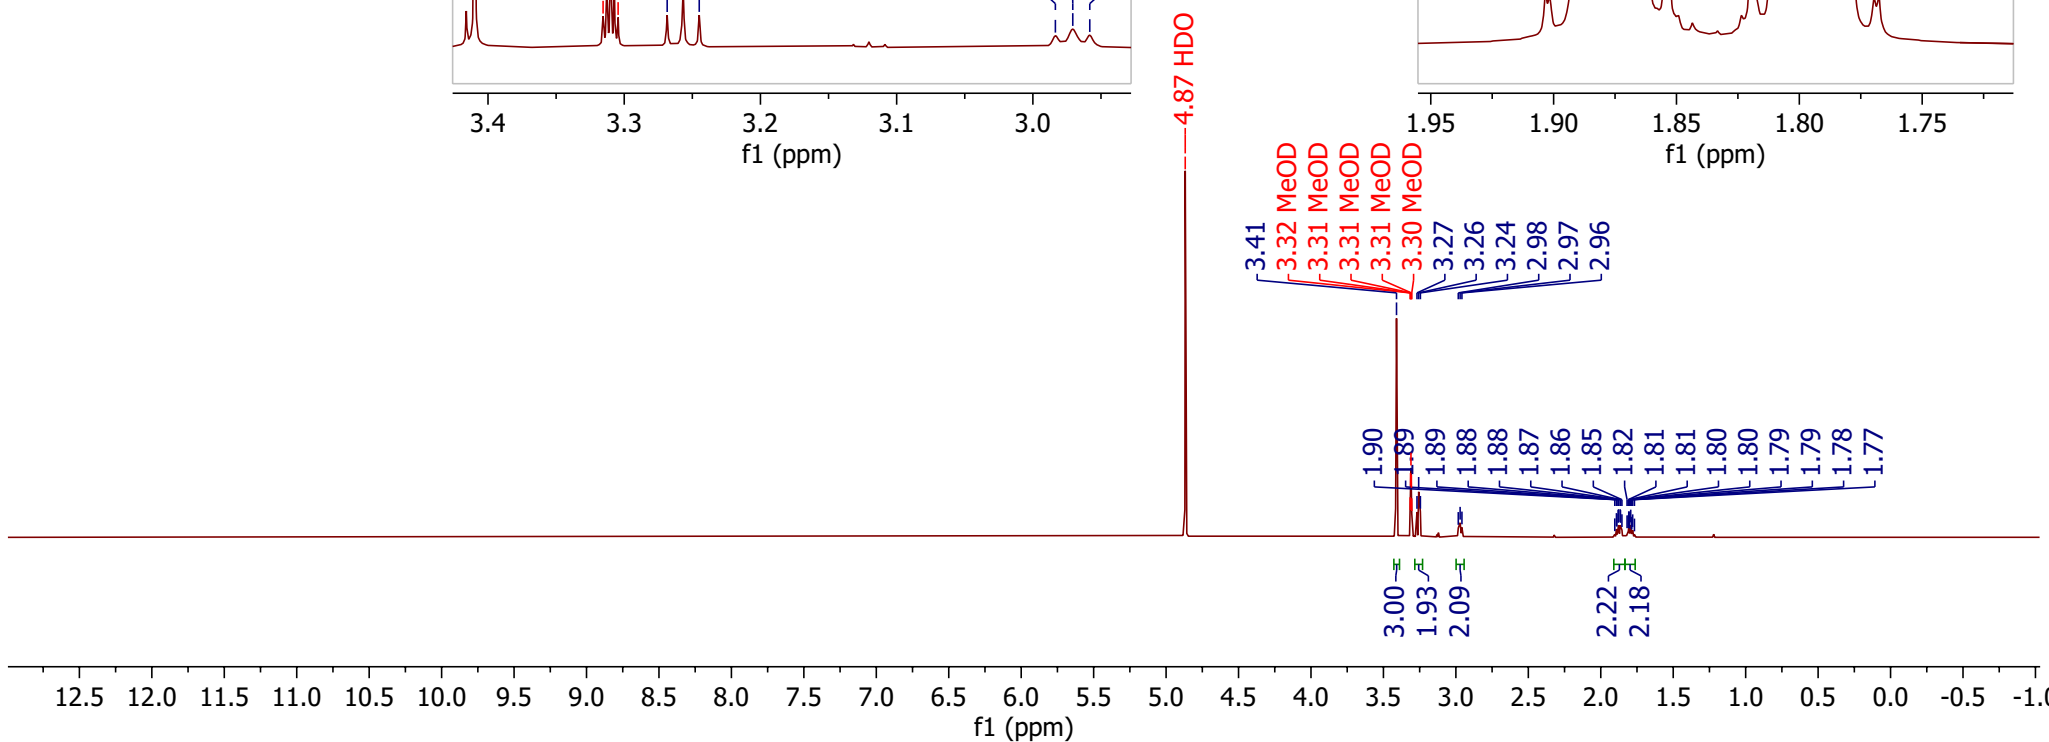



Compound 46  
<sup>1</sup>H NMR (151 MHz, MeOD-d4)

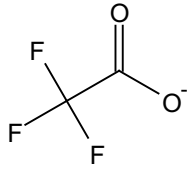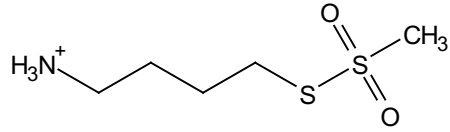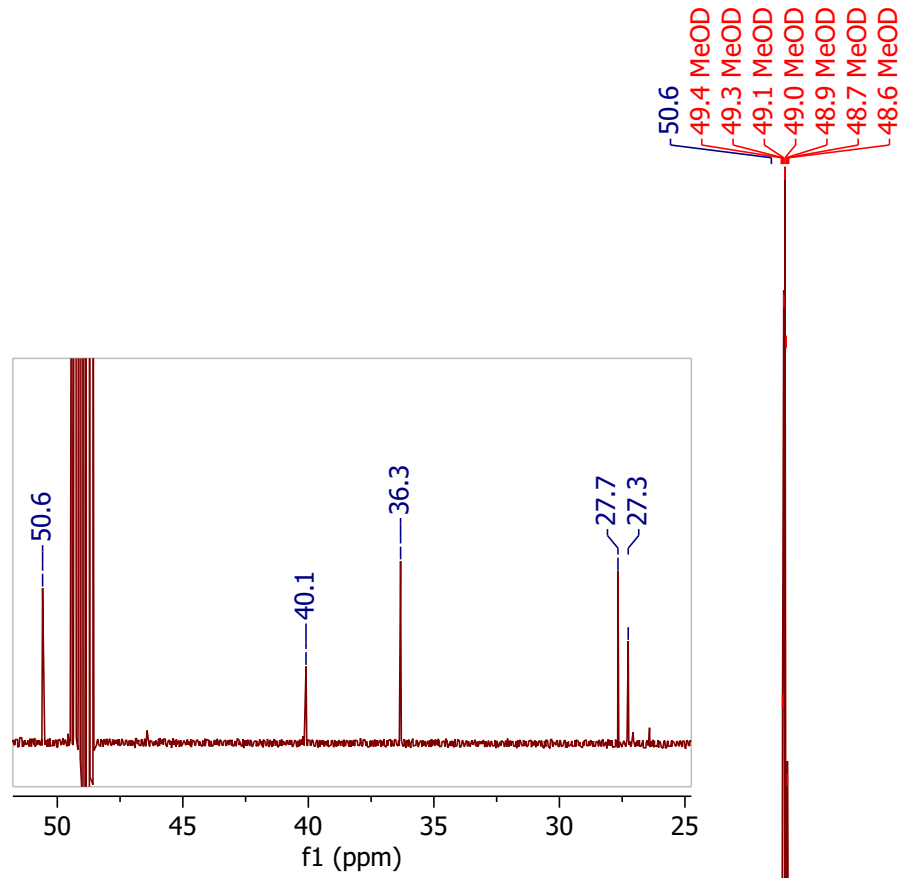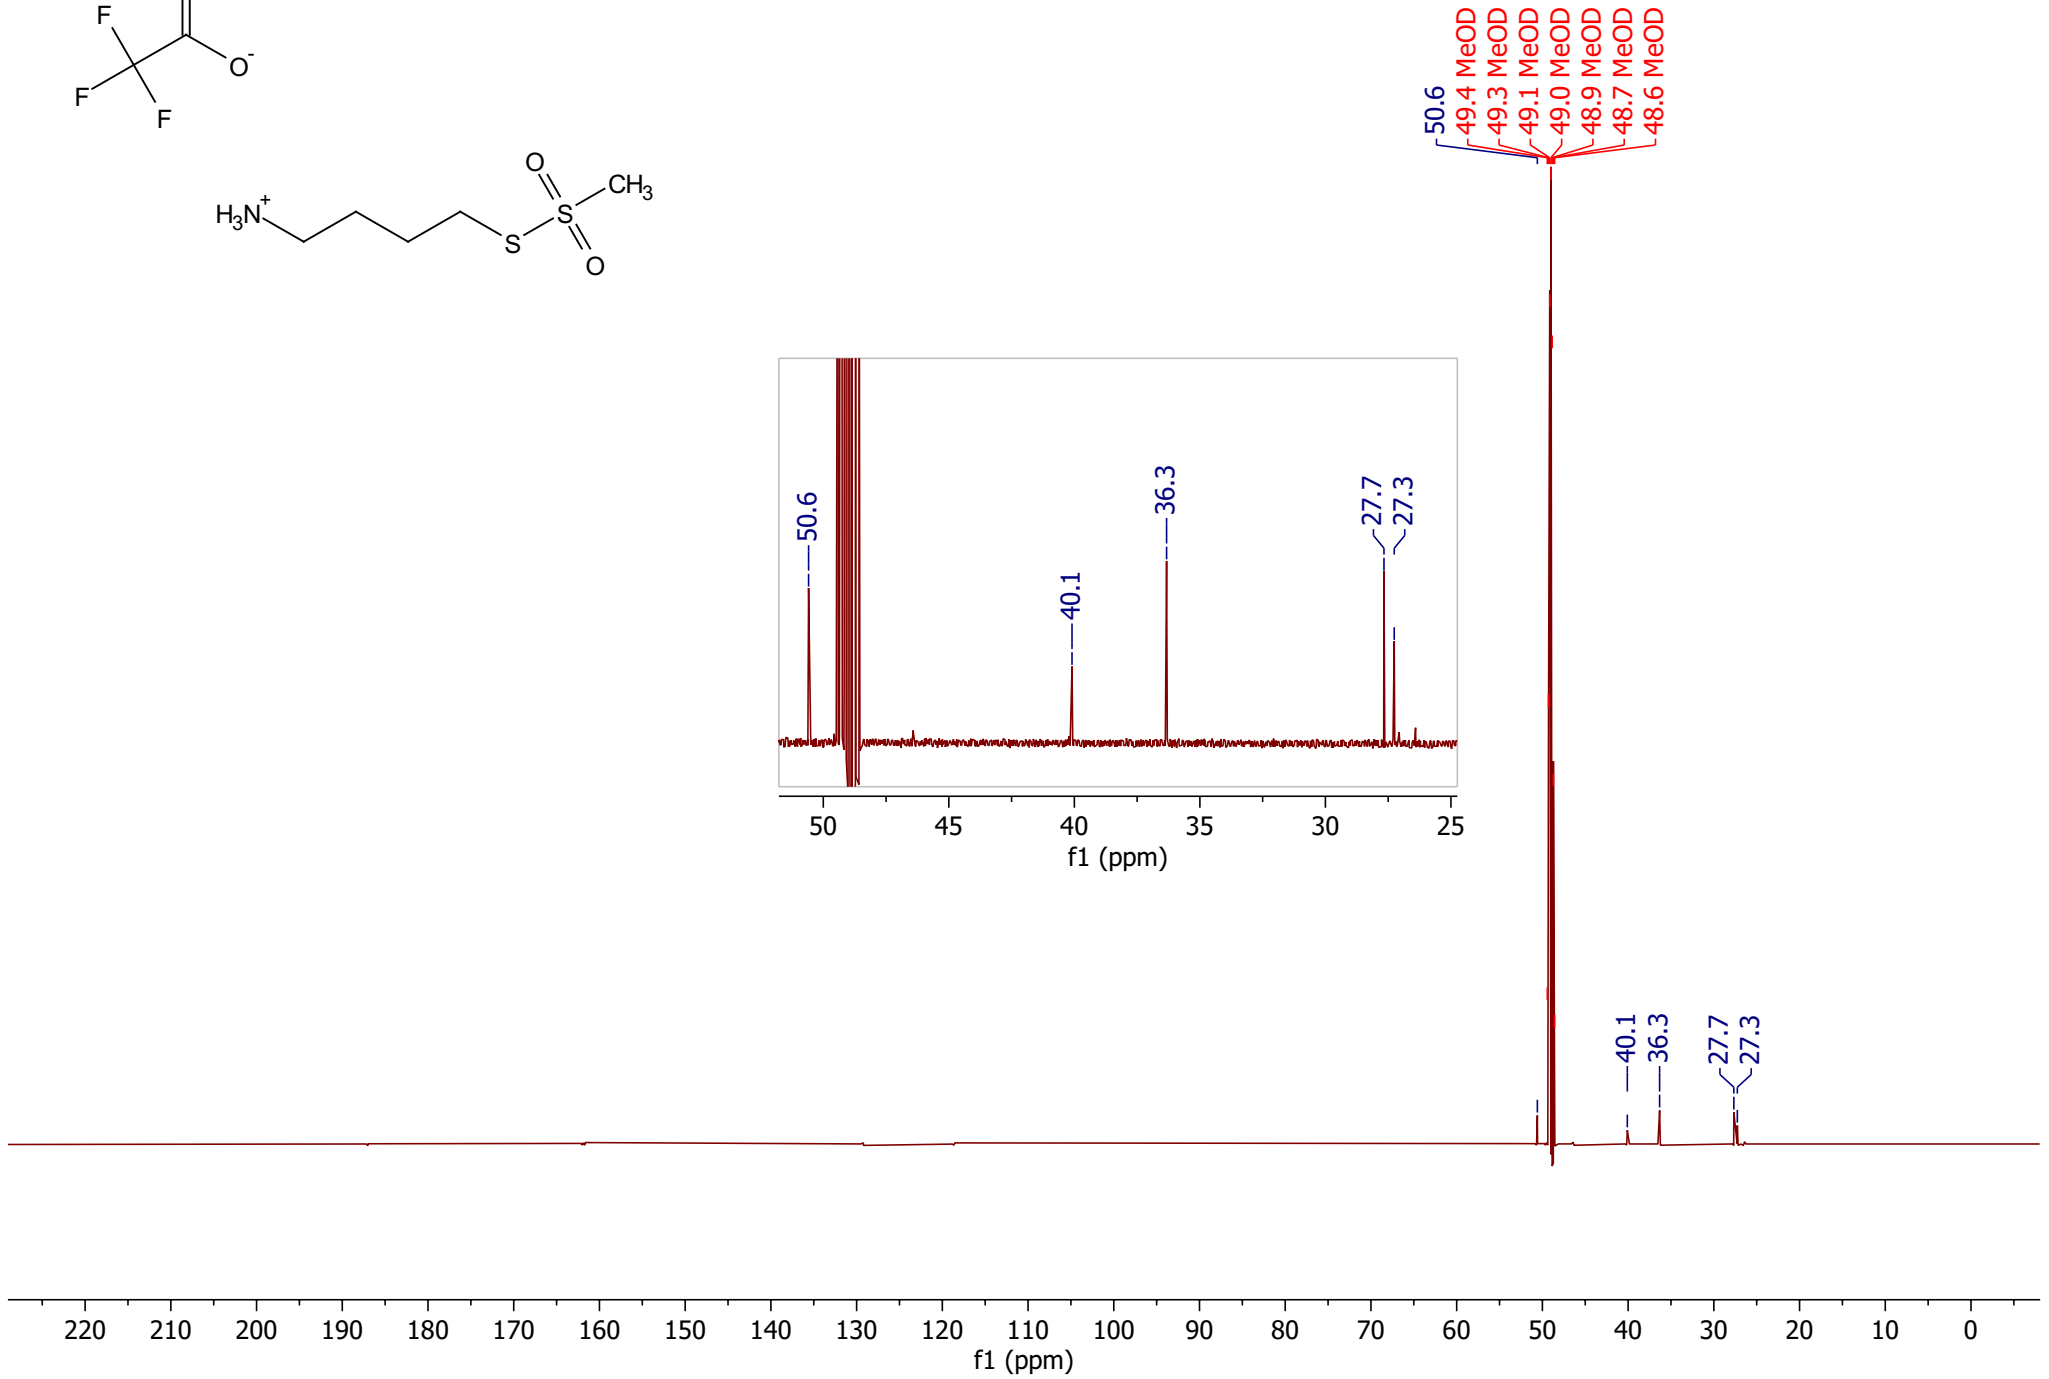

Compound 47  
<sup>1</sup>H NMR (600 MHz, MeOD-d4)

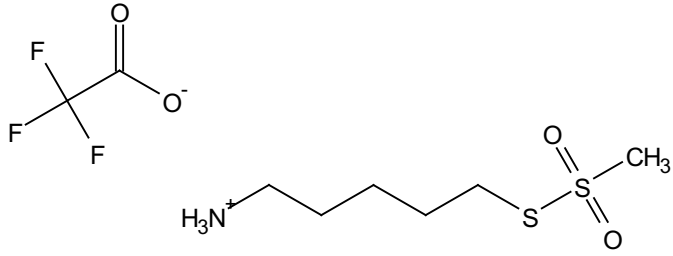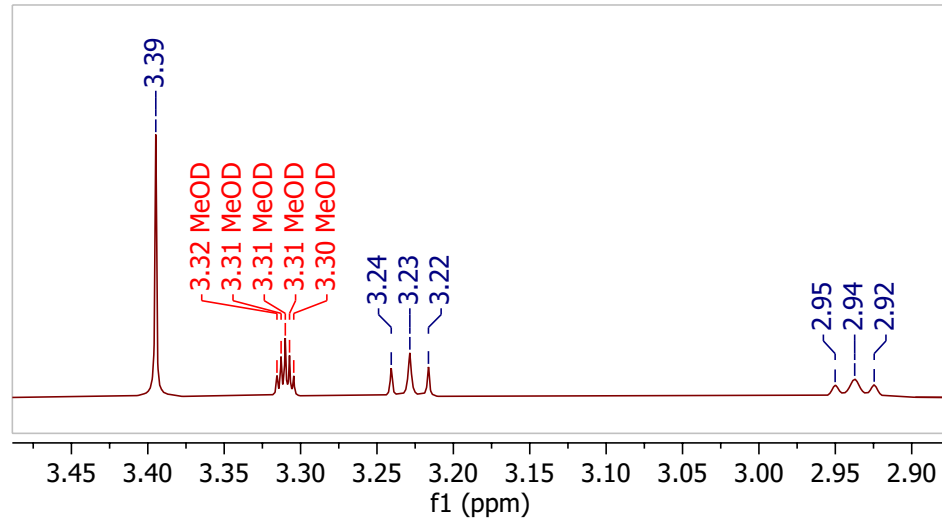

4.87 HDO

3.39  
3.32 MeOD  
3.31 MeOD  
3.31 MeOD  
3.31 MeOD  
3.30 MeOD  
3.24  
3.23  
3.22  
2.95  
2.94  
2.92

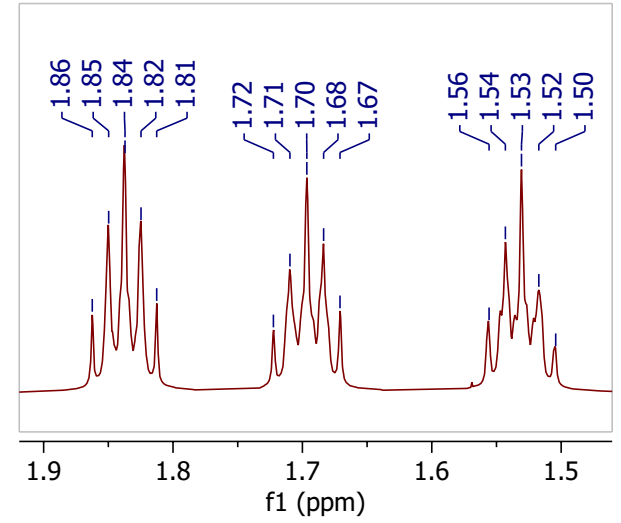

1.86  
1.85  
1.84  
1.82  
1.81  
1.72  
1.71  
1.70  
1.68  
1.67  
1.56  
1.54  
1.53  
1.52  
1.50

2.91  
2.00  
2.01  
2.06  
2.06  
2.04

12.5 12.0 11.5 11.0 10.5 10.0 9.5 9.0 8.5 8.0 7.5 7.0 6.5 6.0 5.5 5.0 4.5 4.0 3.5 3.0 2.5 2.0 1.5 1.0 0.5 0.0 -0.5 -1.0  
f1 (ppm)

Compound 47  
<sup>1</sup>H NMR (151 MHz, MeOD-d4)

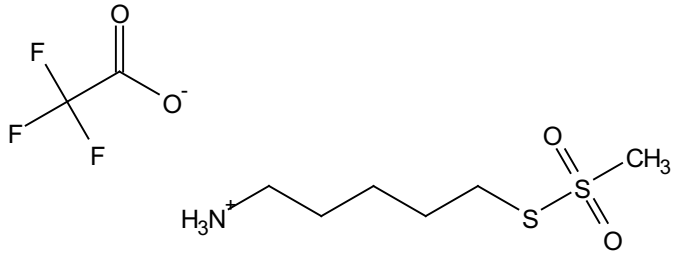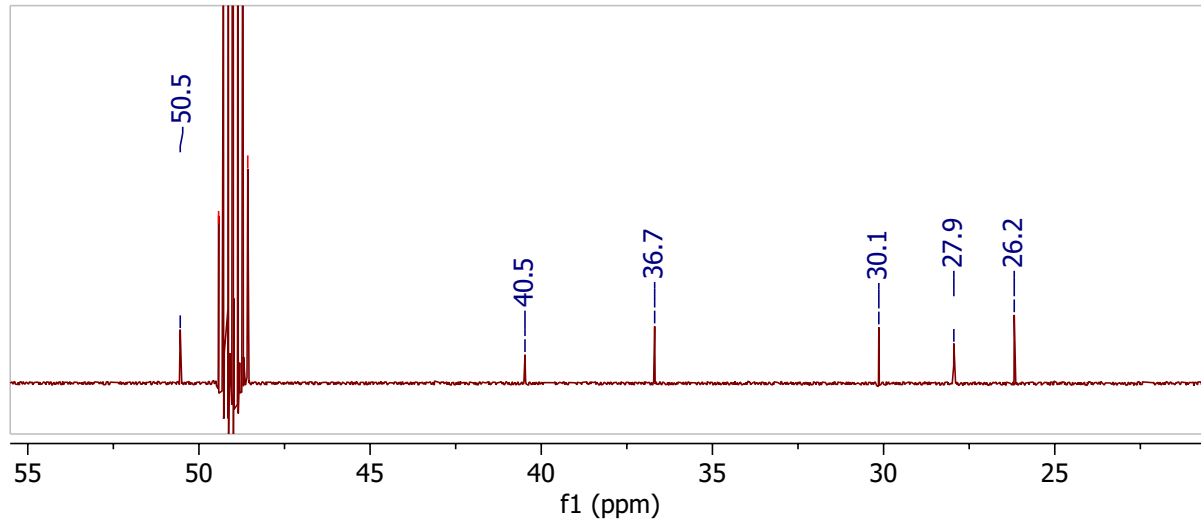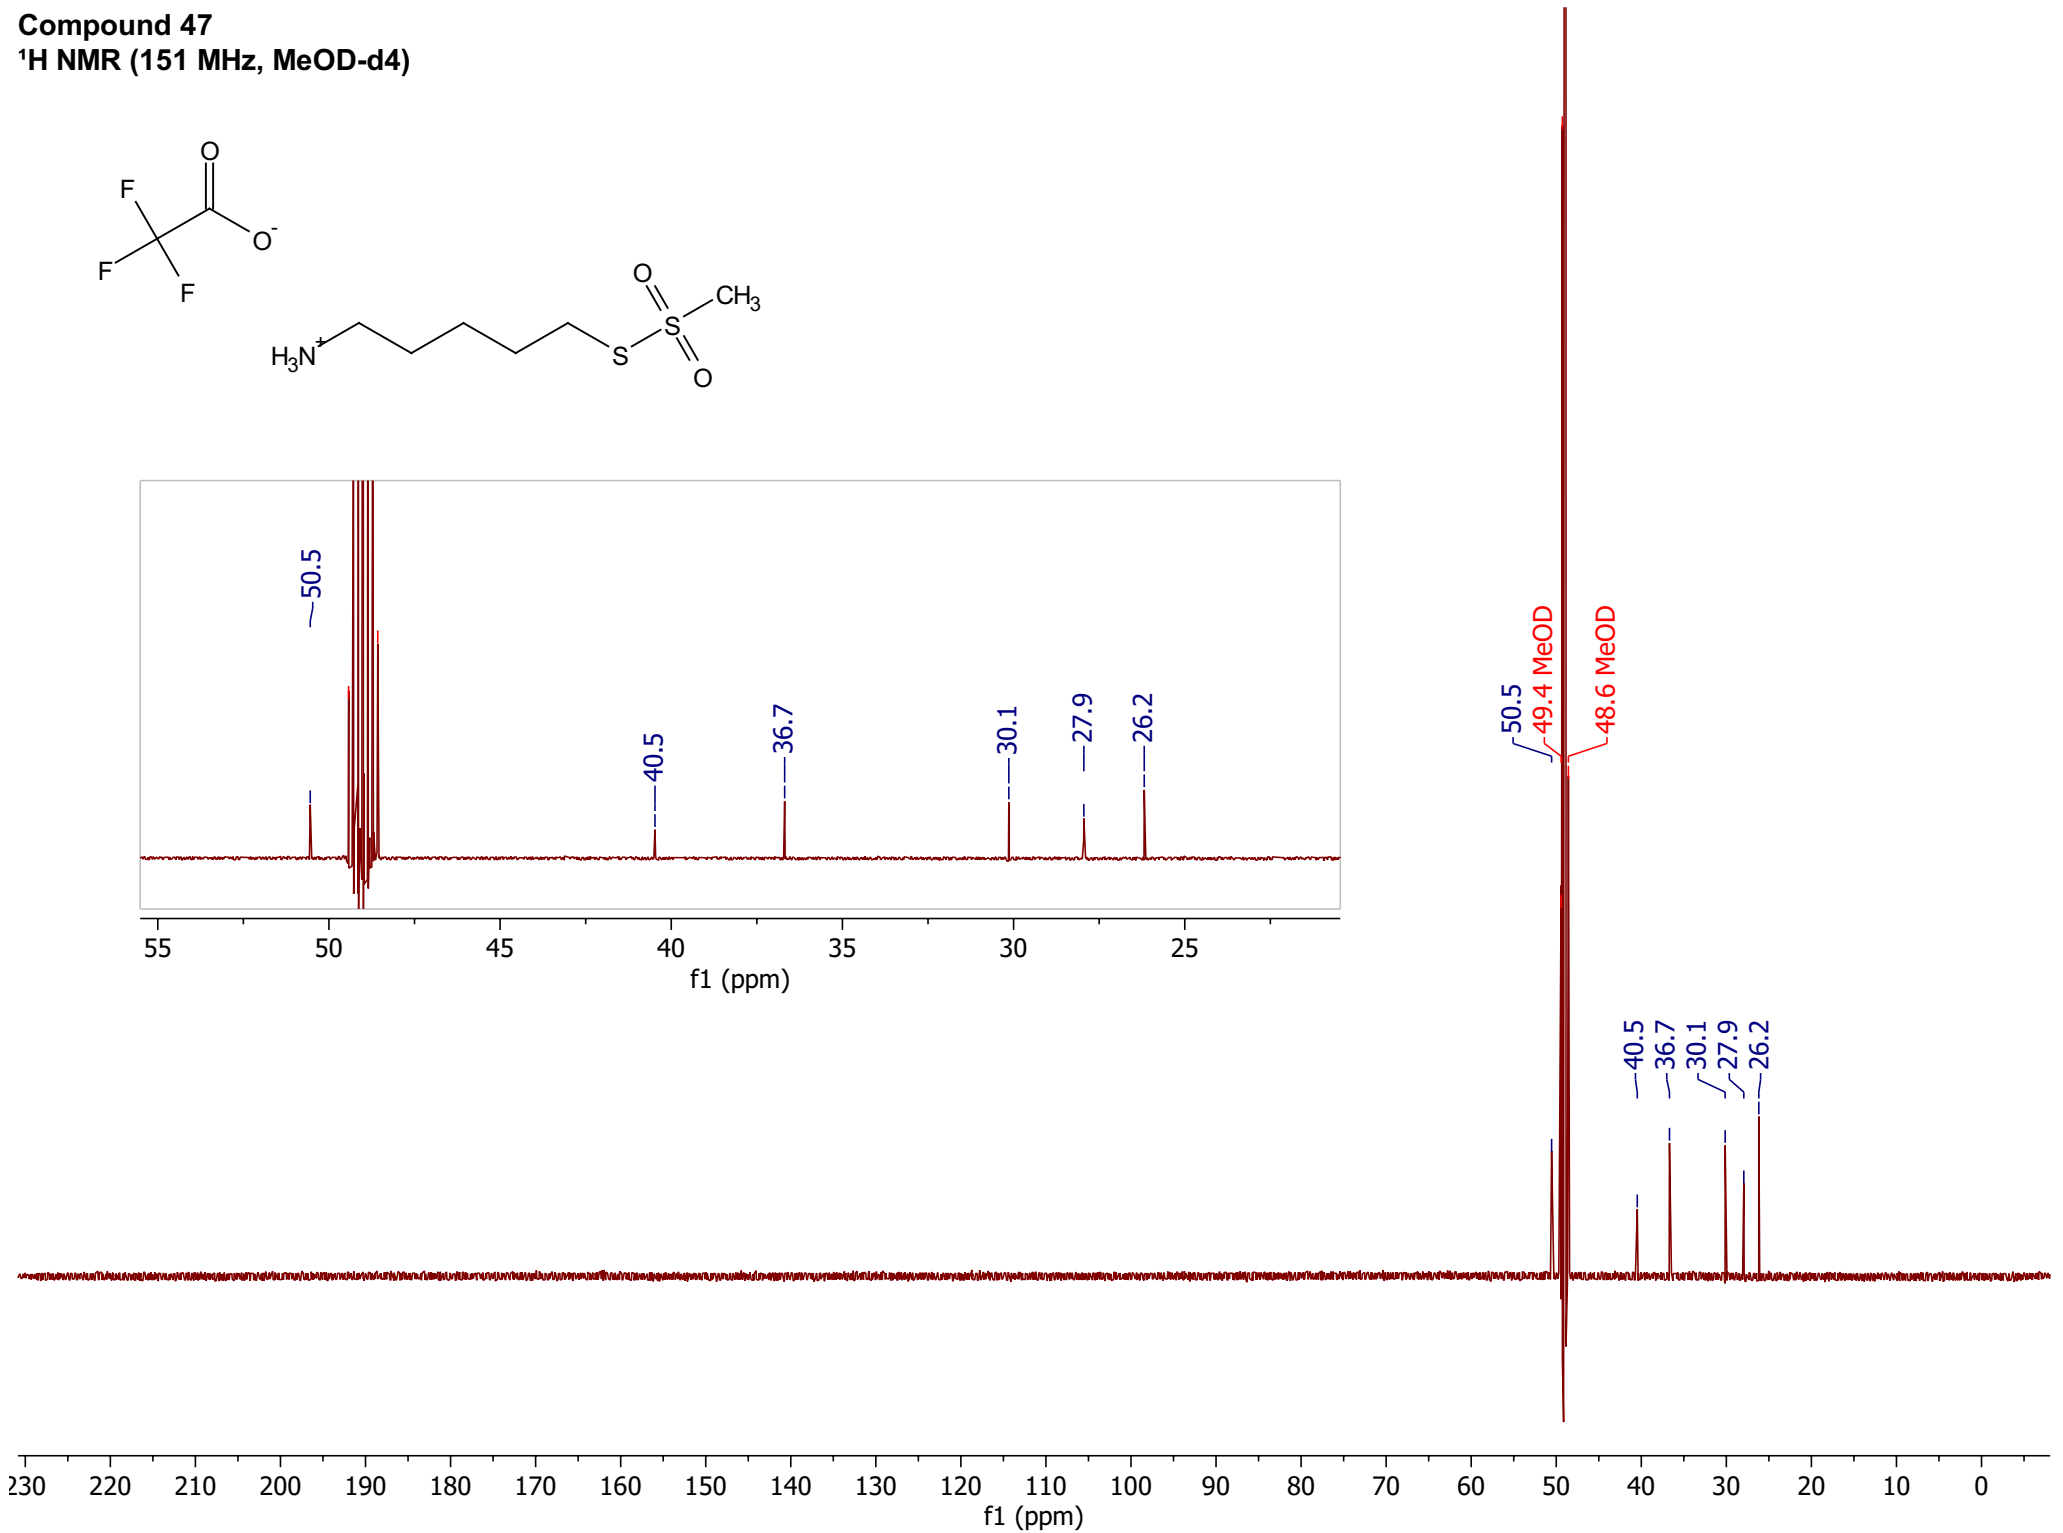

**Compound 50**  
**<sup>1</sup>H NMR (600 MHz, DMSO-d6)**

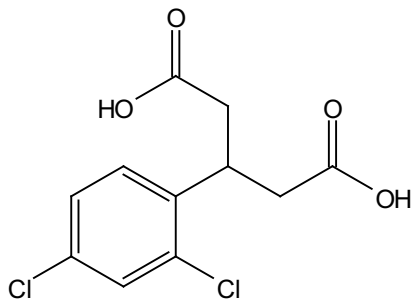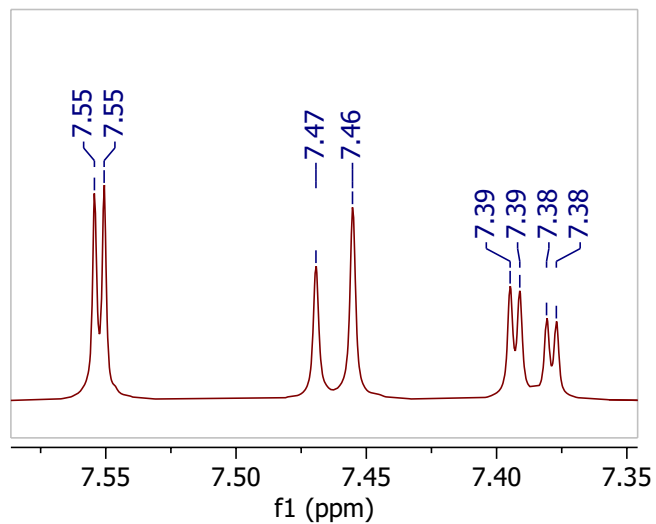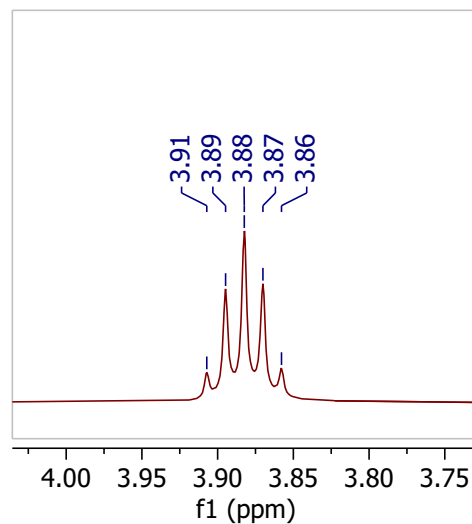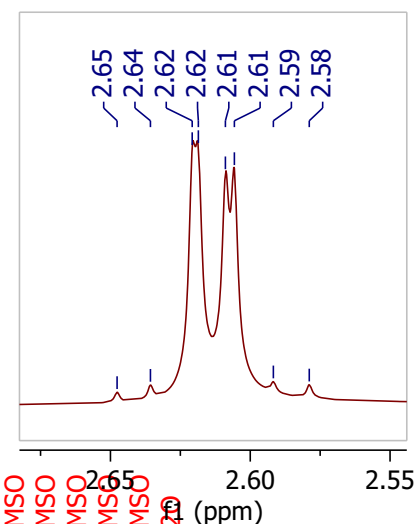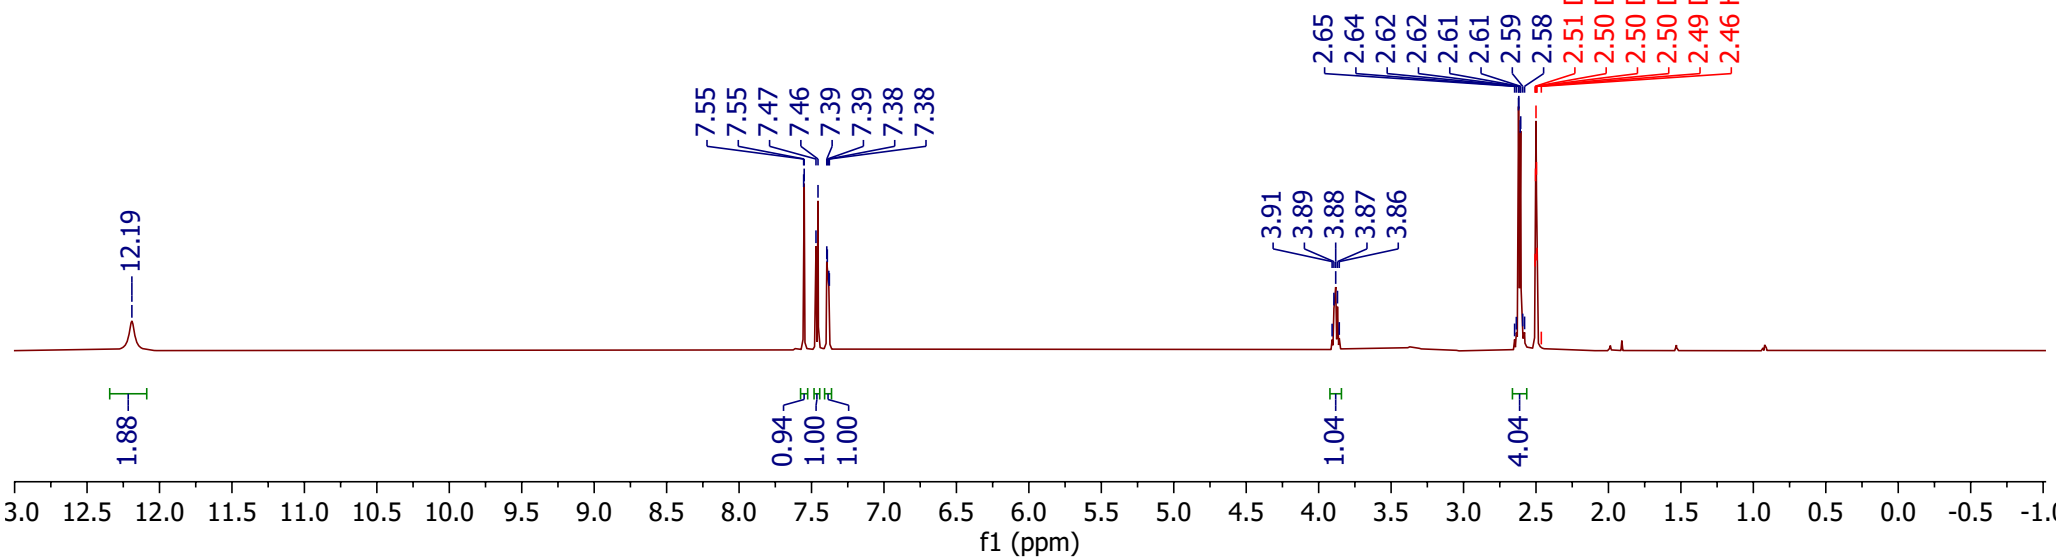

Compound 50  
<sup>1</sup>H NMR (151 MHz, DMSO-d6)

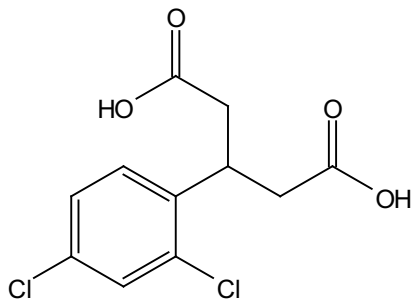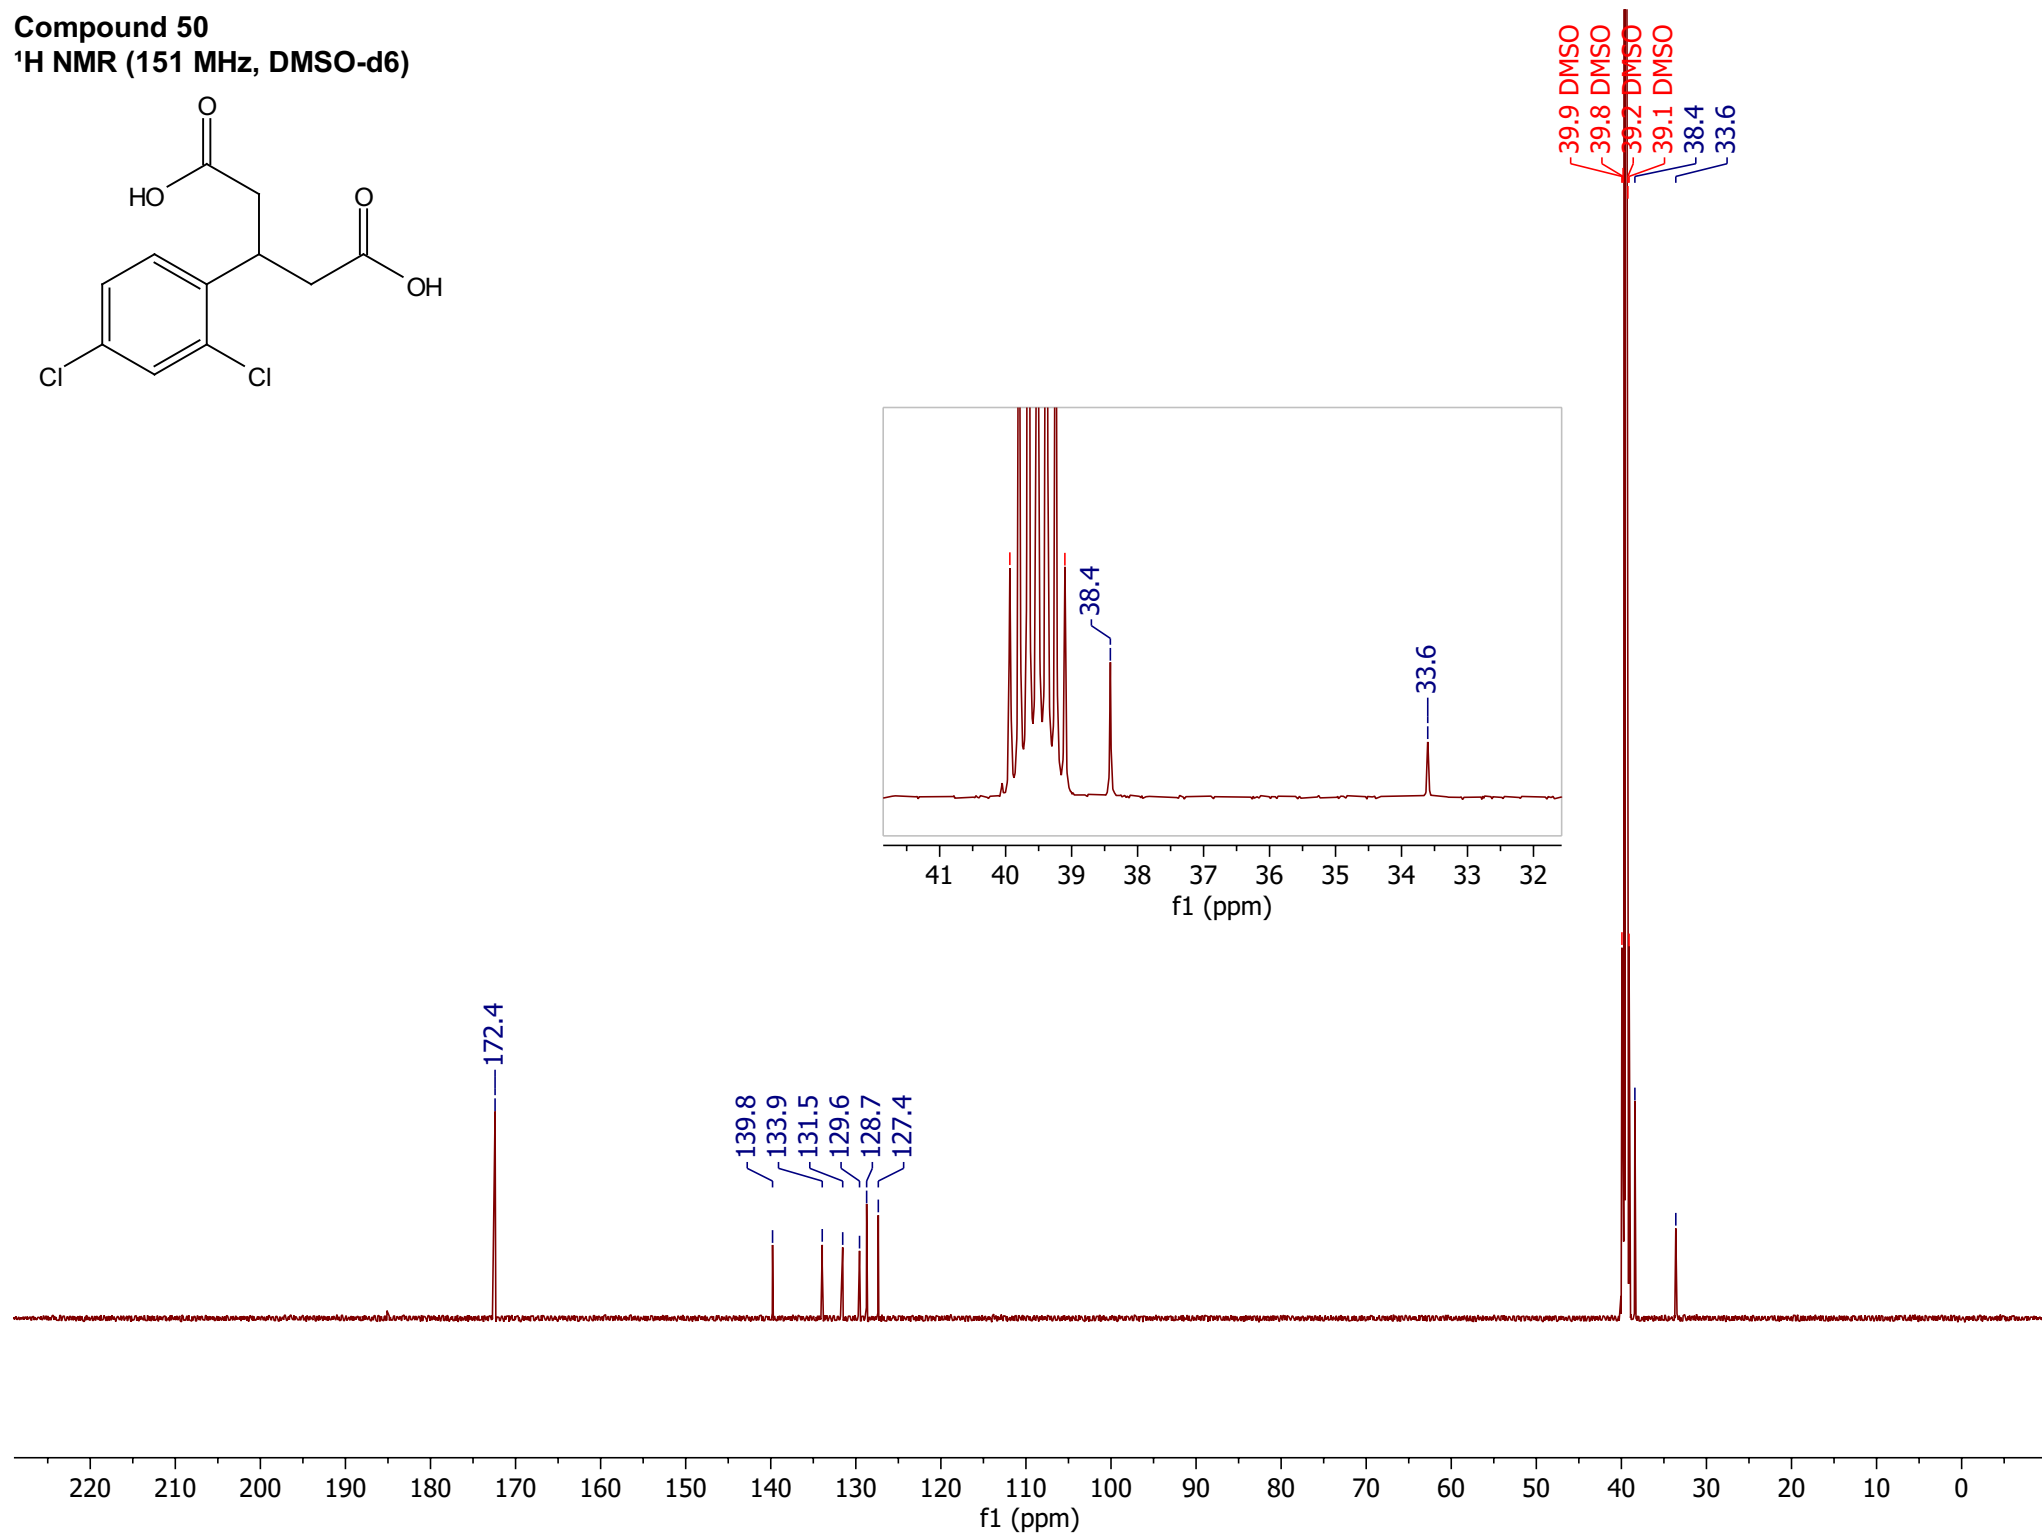

Compound 51  
<sup>1</sup>H NMR (600 MHz, DMSO-d6)

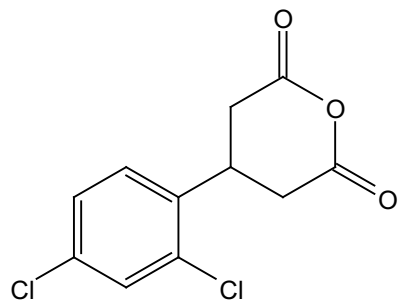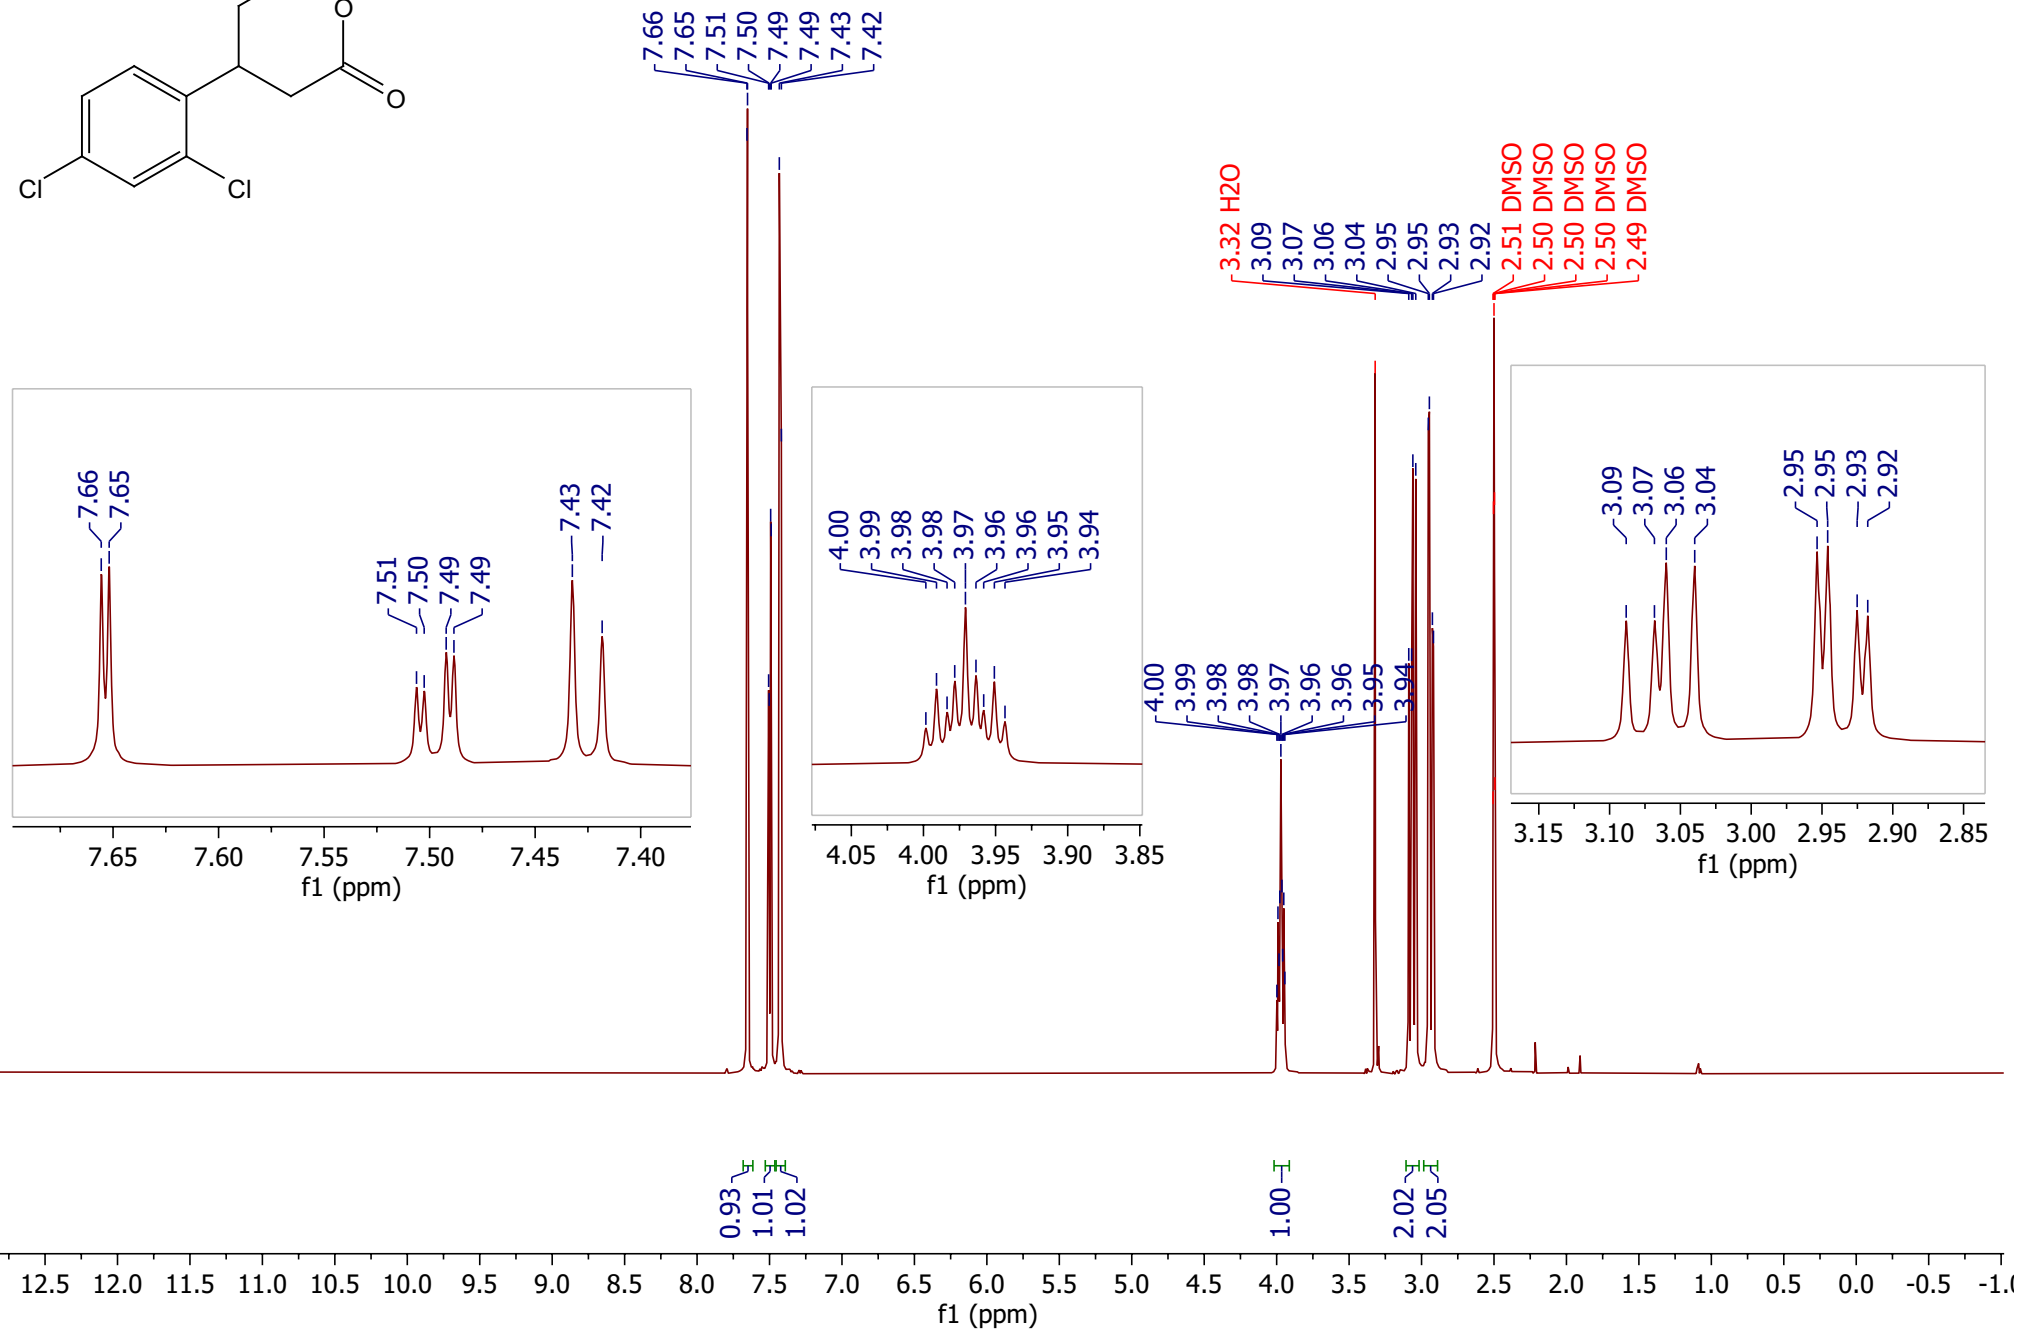

Compound 51  
1H NMR (151 MHz, DMSO-d6)

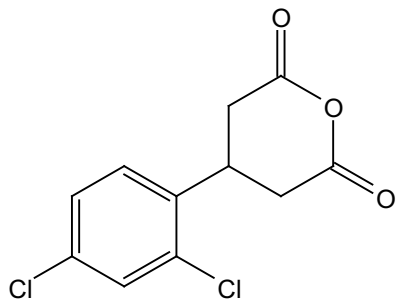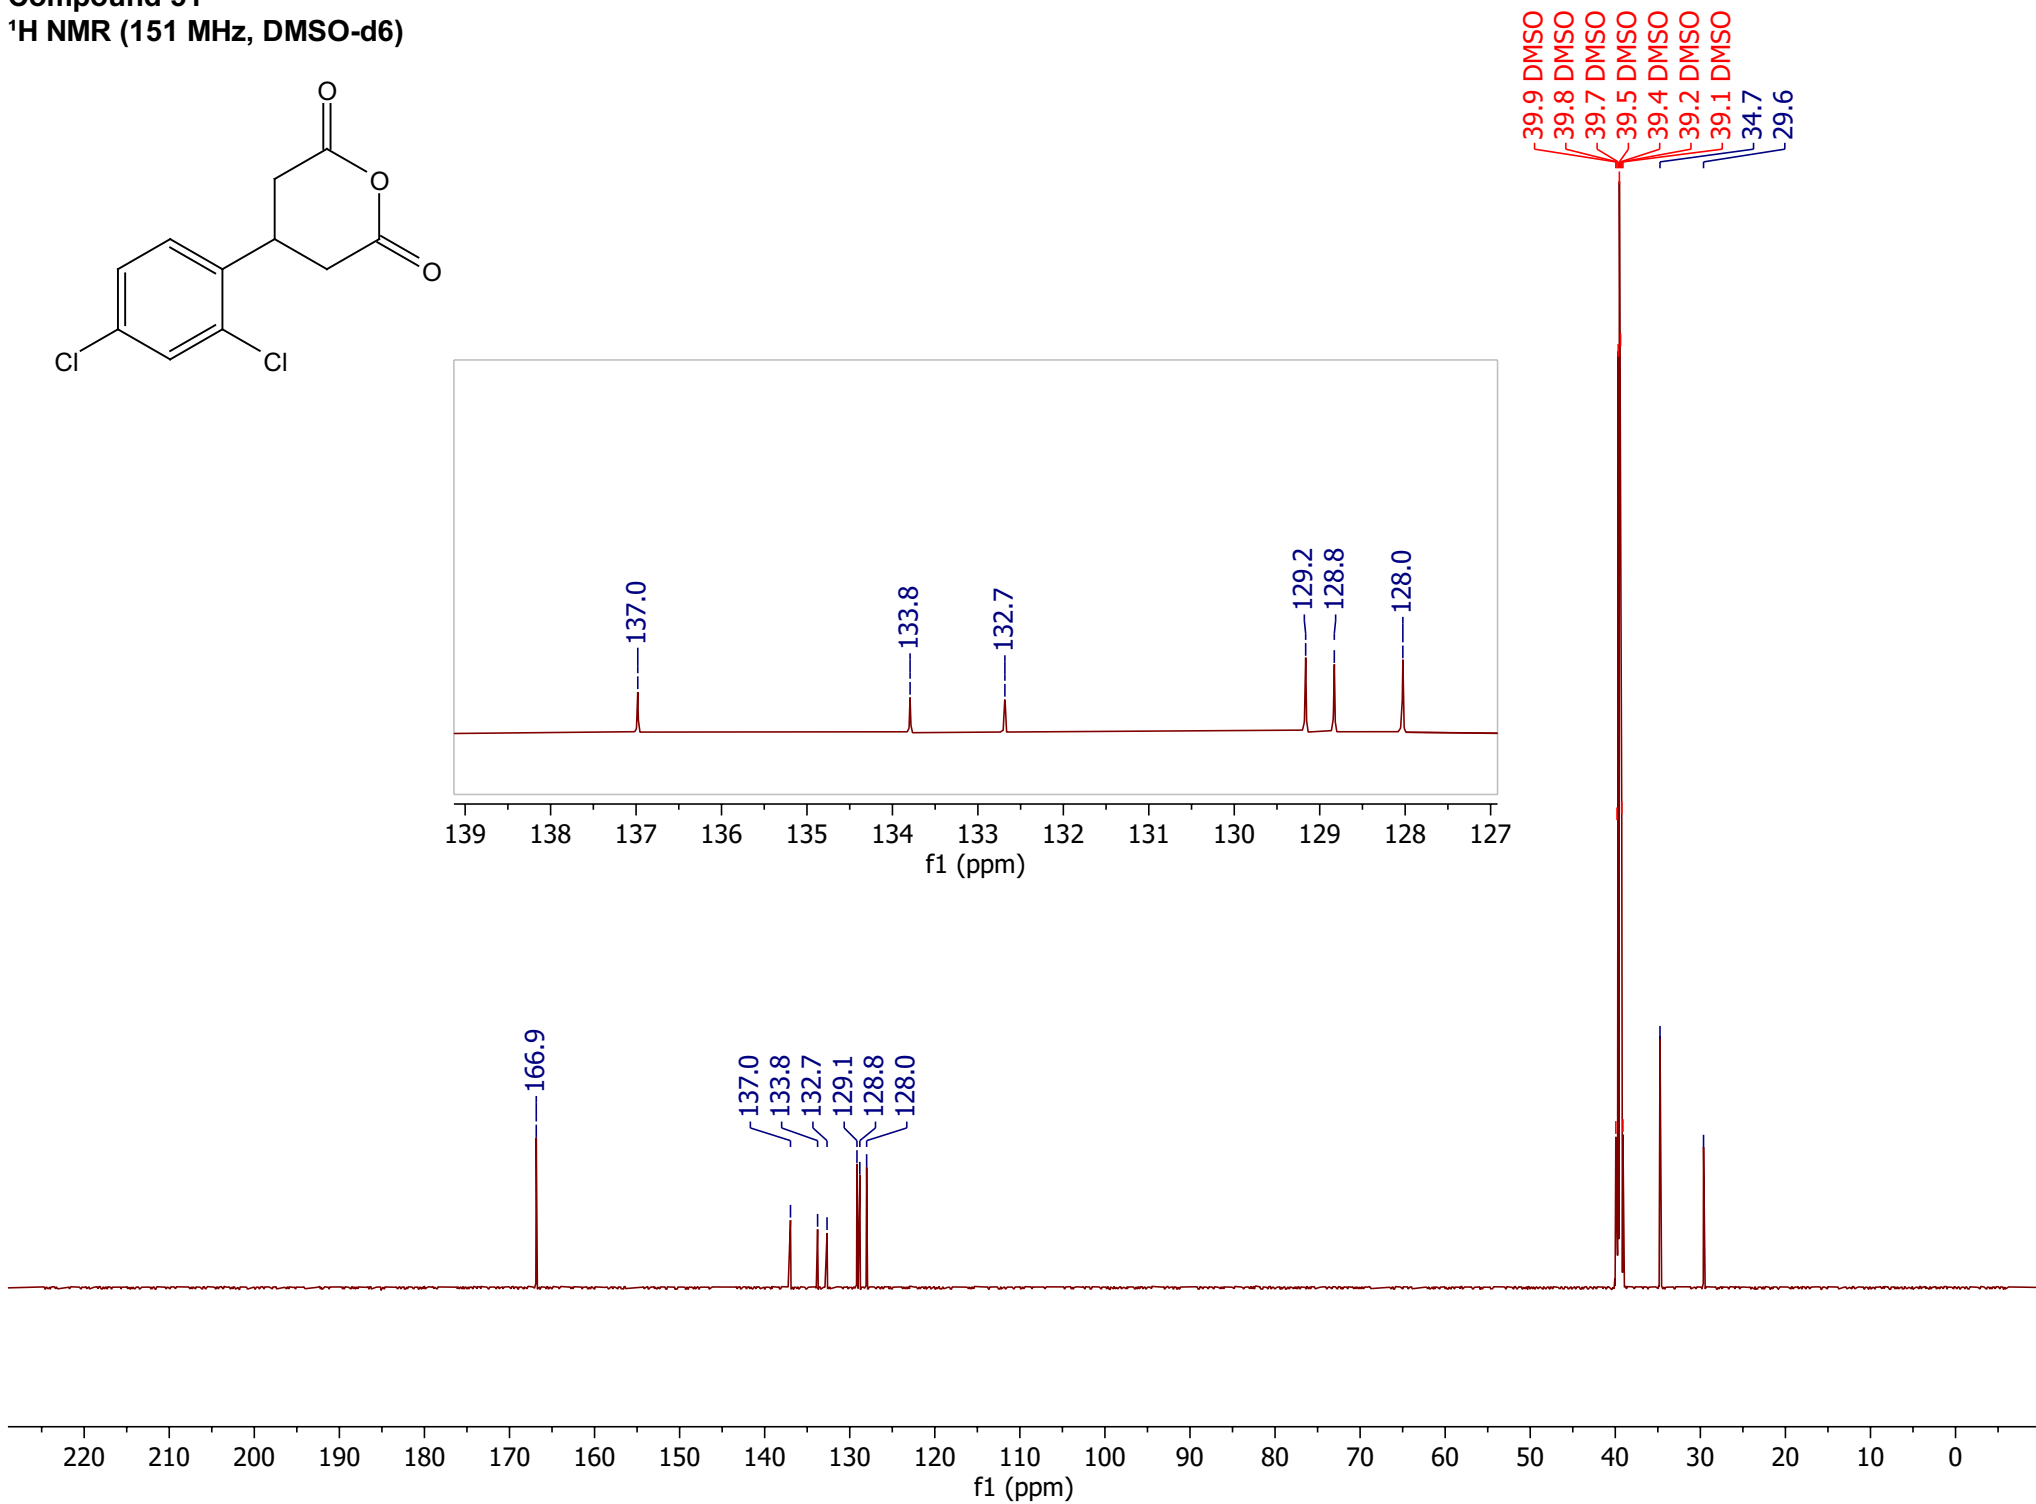

Compound 52  
<sup>1</sup>H NMR (400 MHz, DMSO-d6)

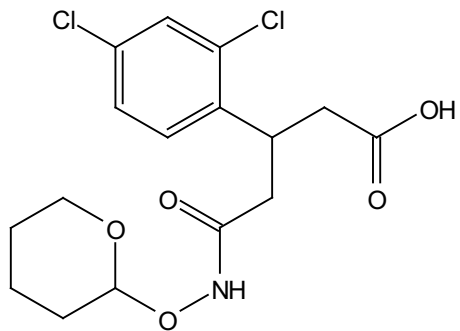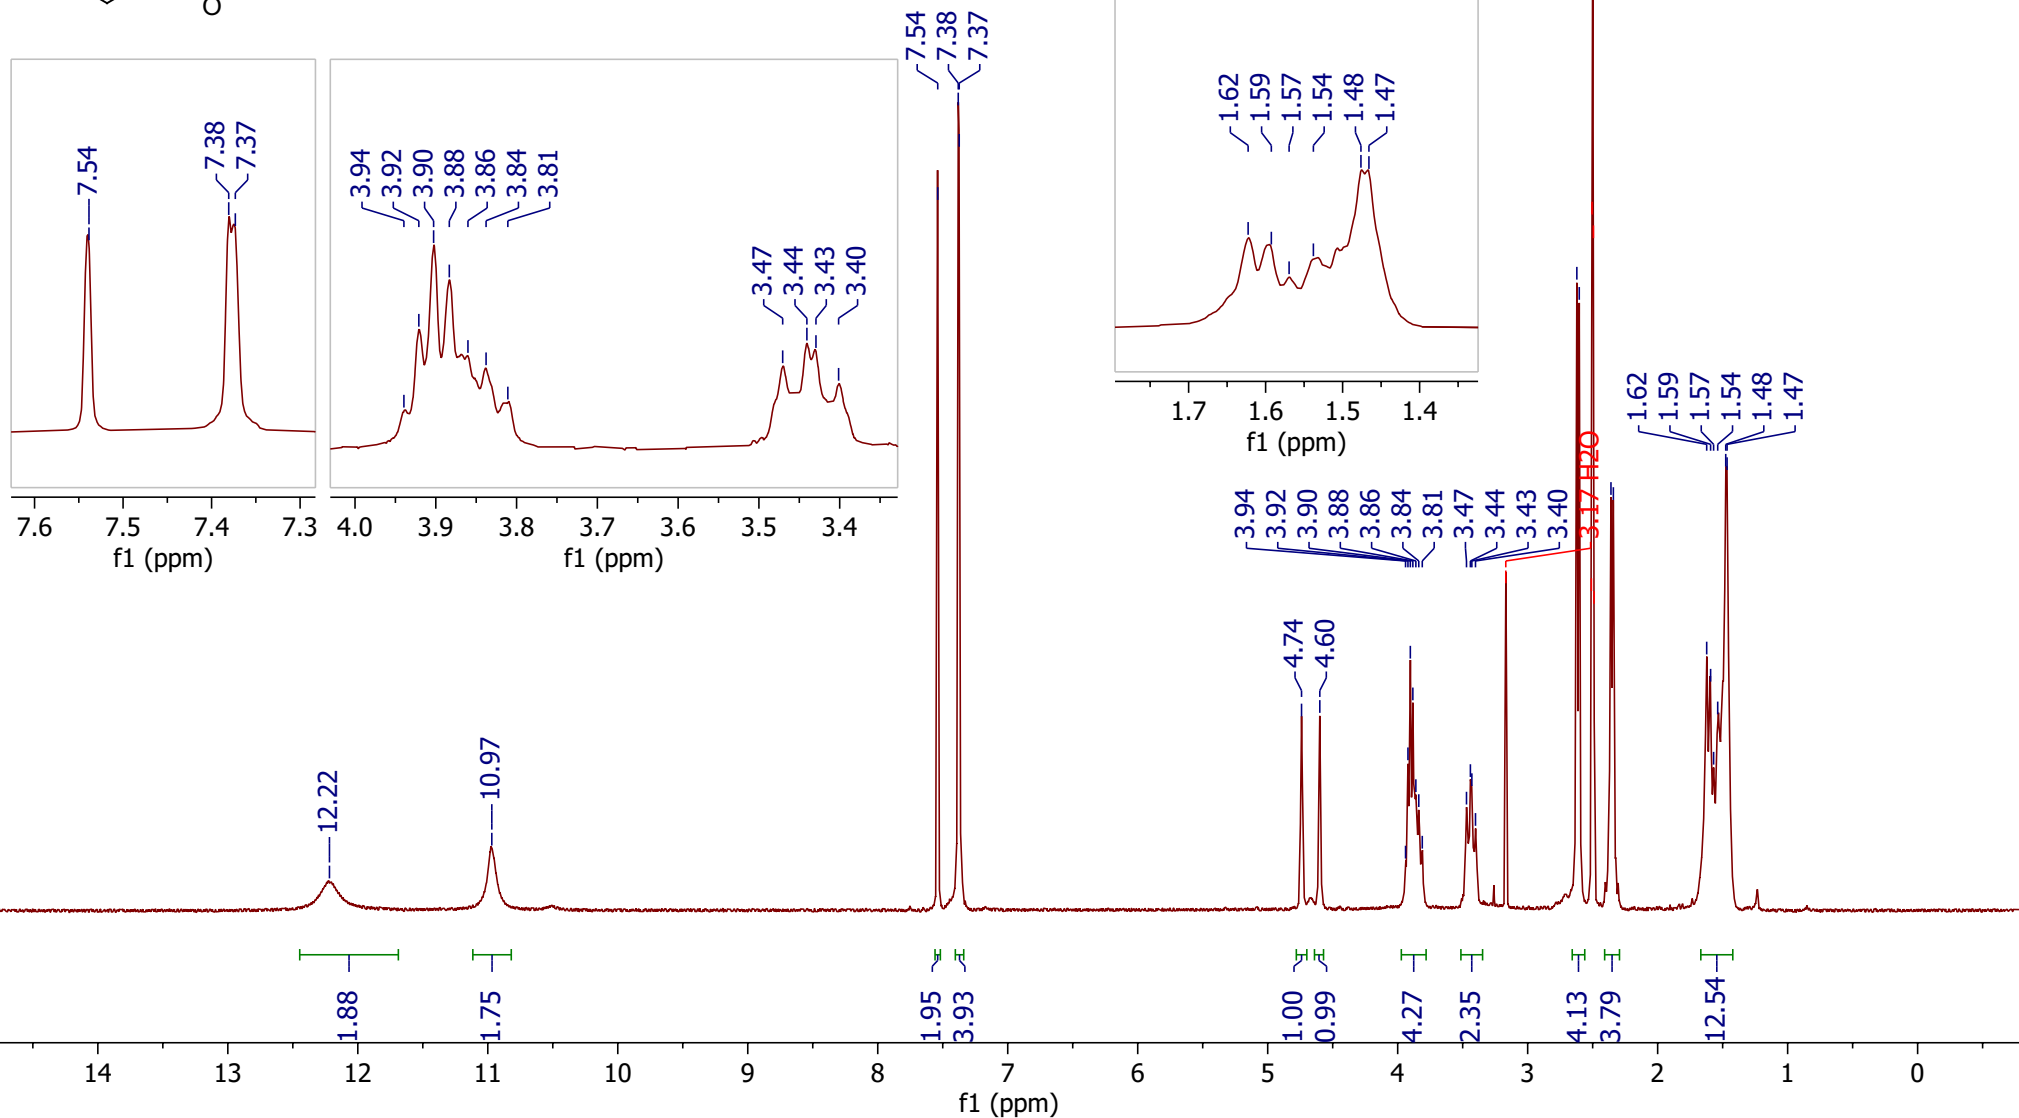



**Compound 52**  
**<sup>1</sup>H NMR (151 MHz, DMSO-d6)**

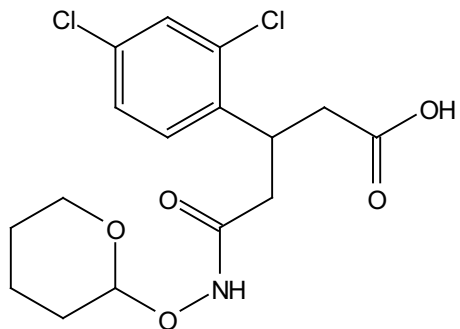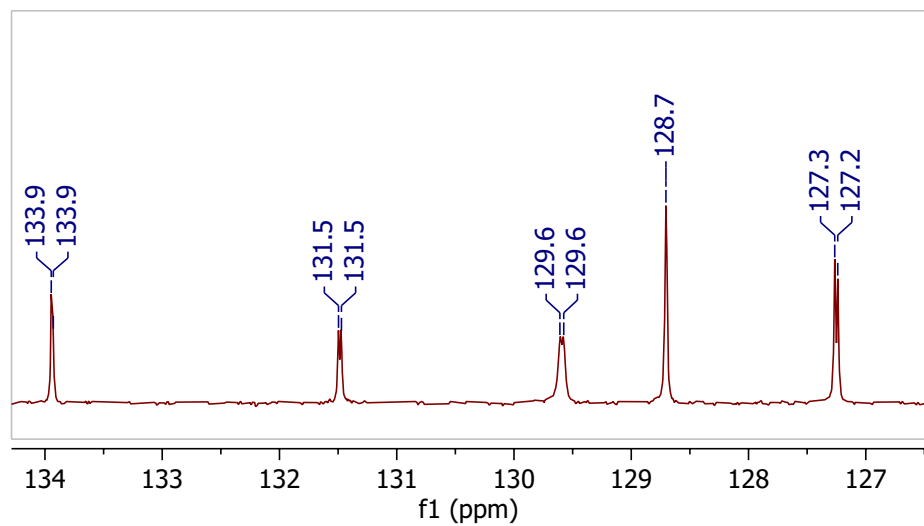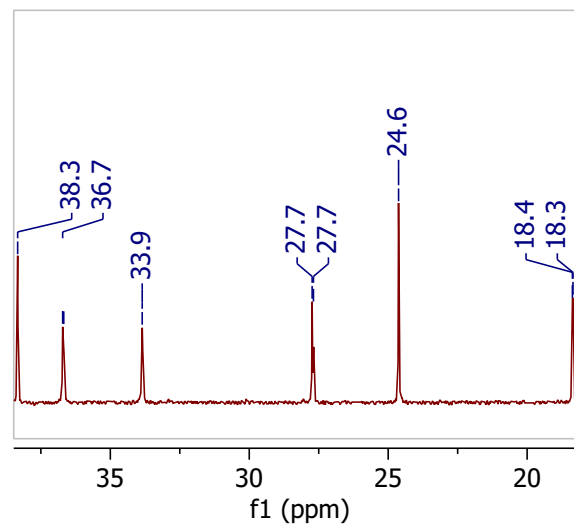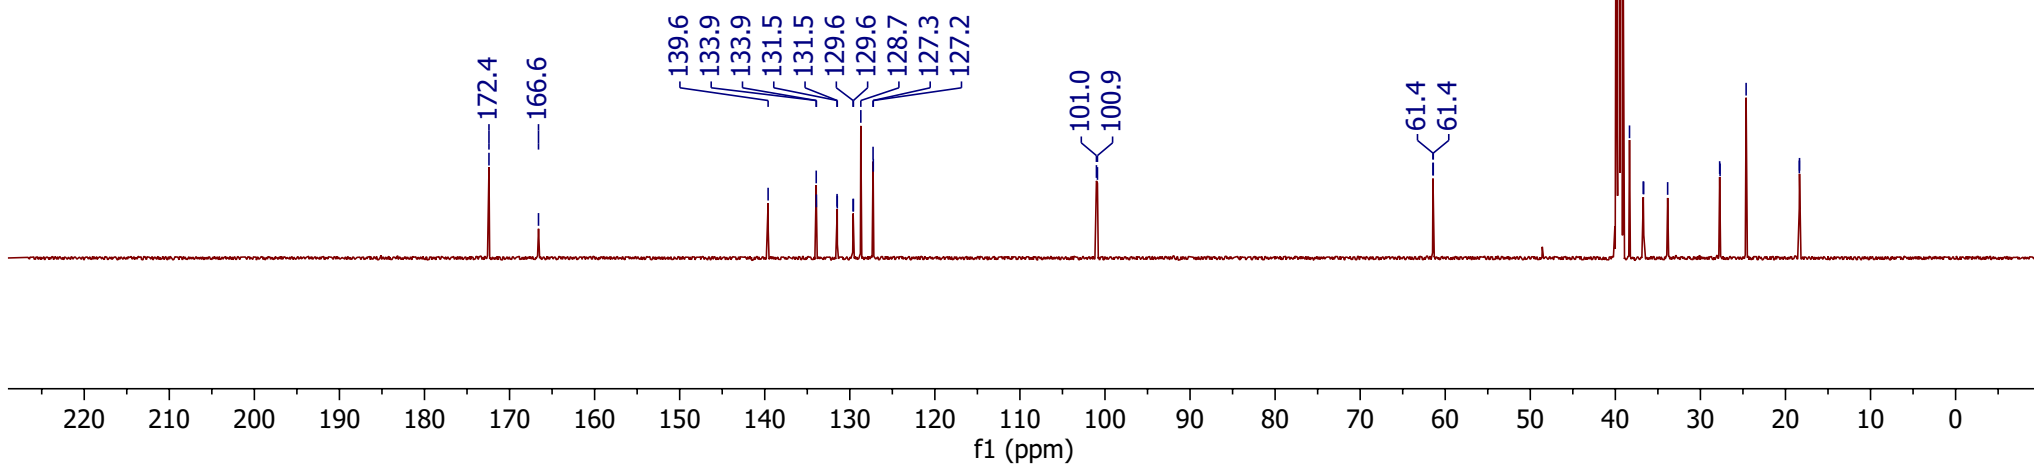

39.9 DMSO  
39.8 DMSO  
39.2 DMSO  
39.1 DMSO  
38.3  
36.7  
36.7  
33.9  
27.7  
27.7  
24.6  
18.4  
18.3

**Compound 53**  
**<sup>1</sup>H NMR (600 MHz, MeOD-d4)**

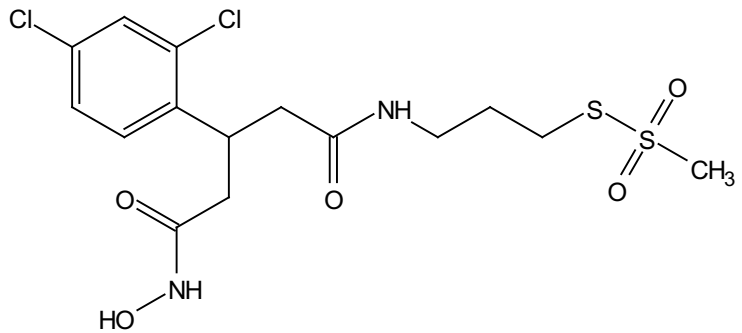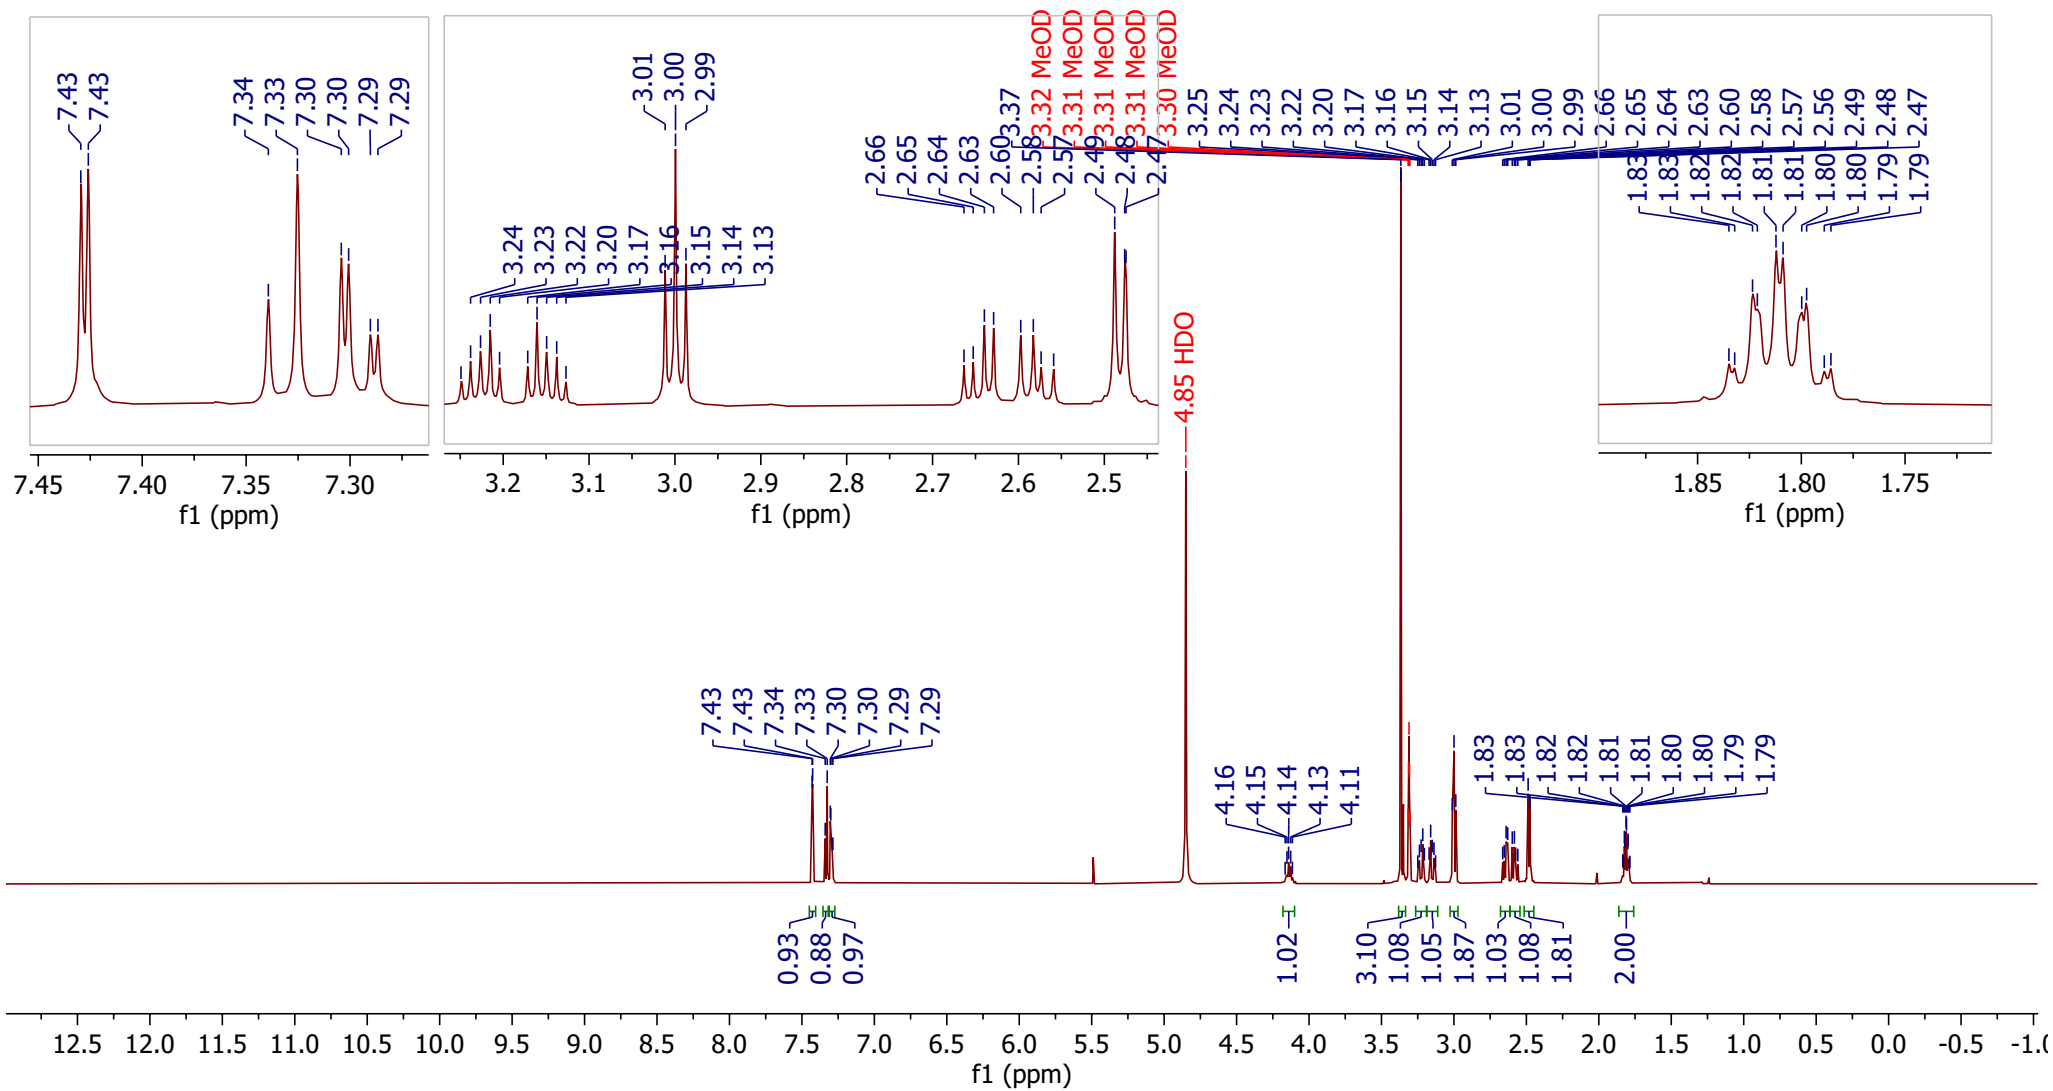

**Compound 53**  
**<sup>1</sup>H NMR (151 MHz, MeOD-d4)**

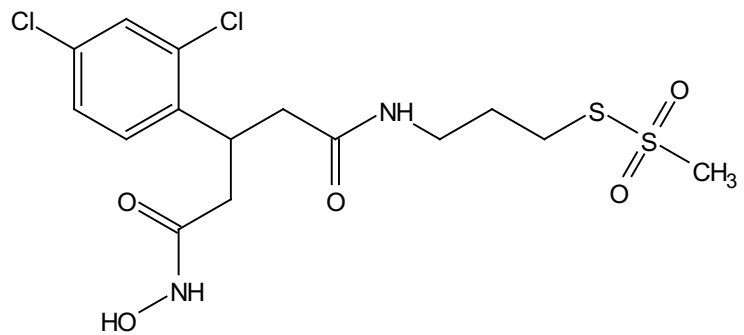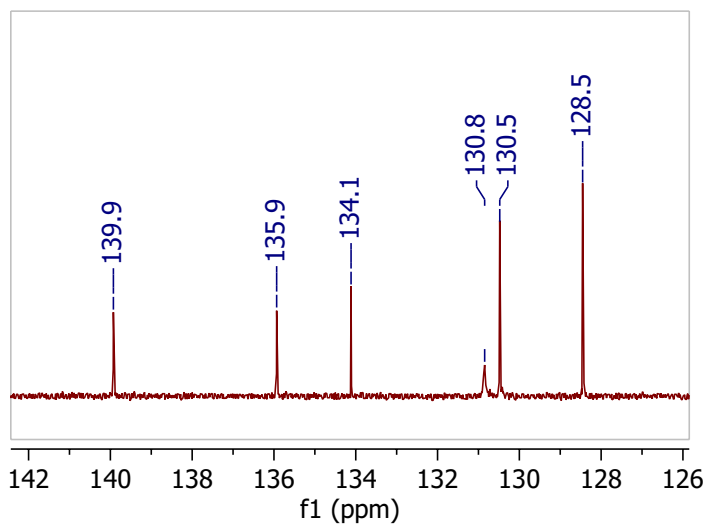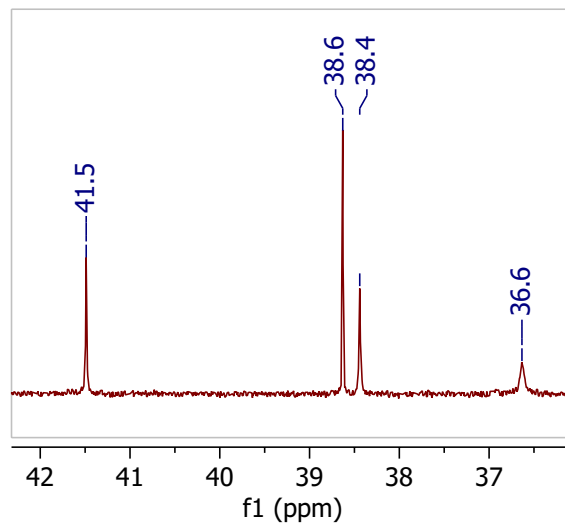

50.7  
49.4 MeOD  
49.3 MeOD  
48.7 MeOD  
48.6 MeOD  
41.5  
38.6  
38.4  
36.6  
34.4  
30.6

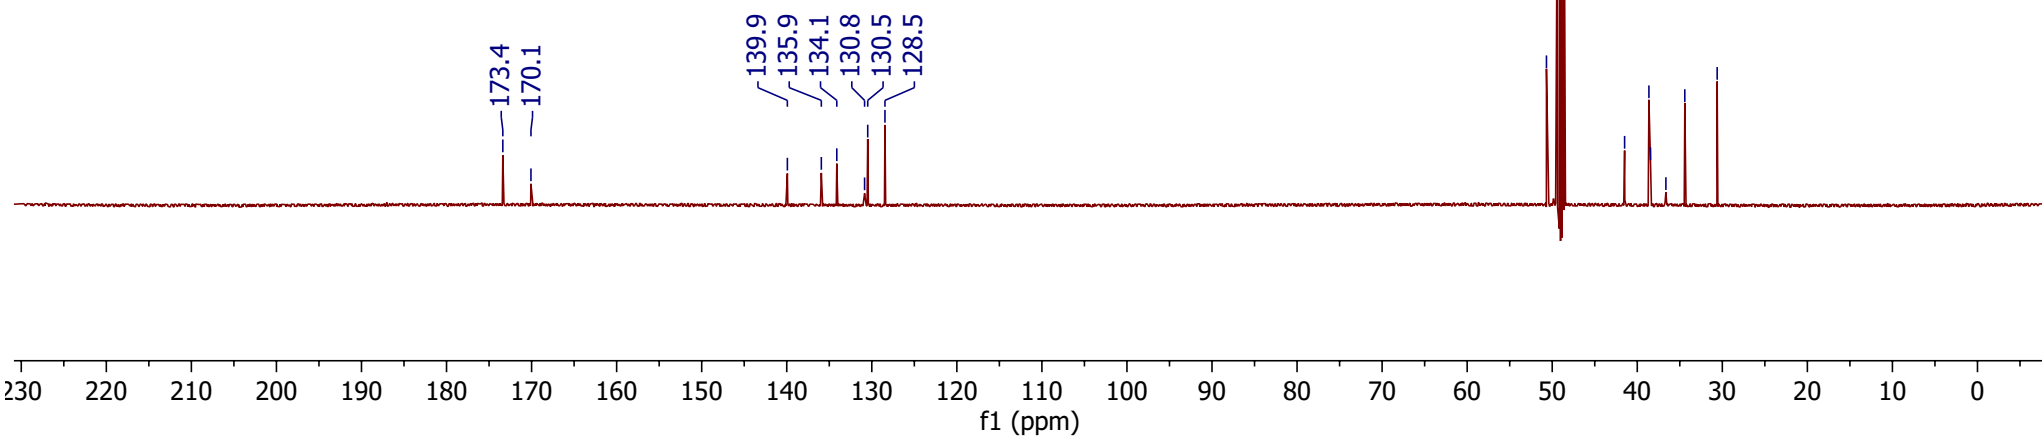

Compound 54  
1H NMR (600 MHz, MeOD-d4)

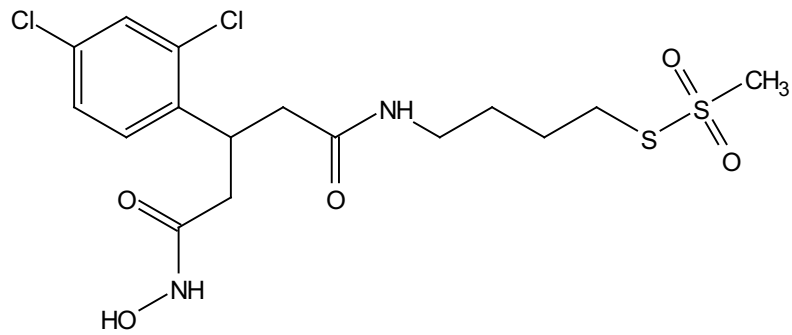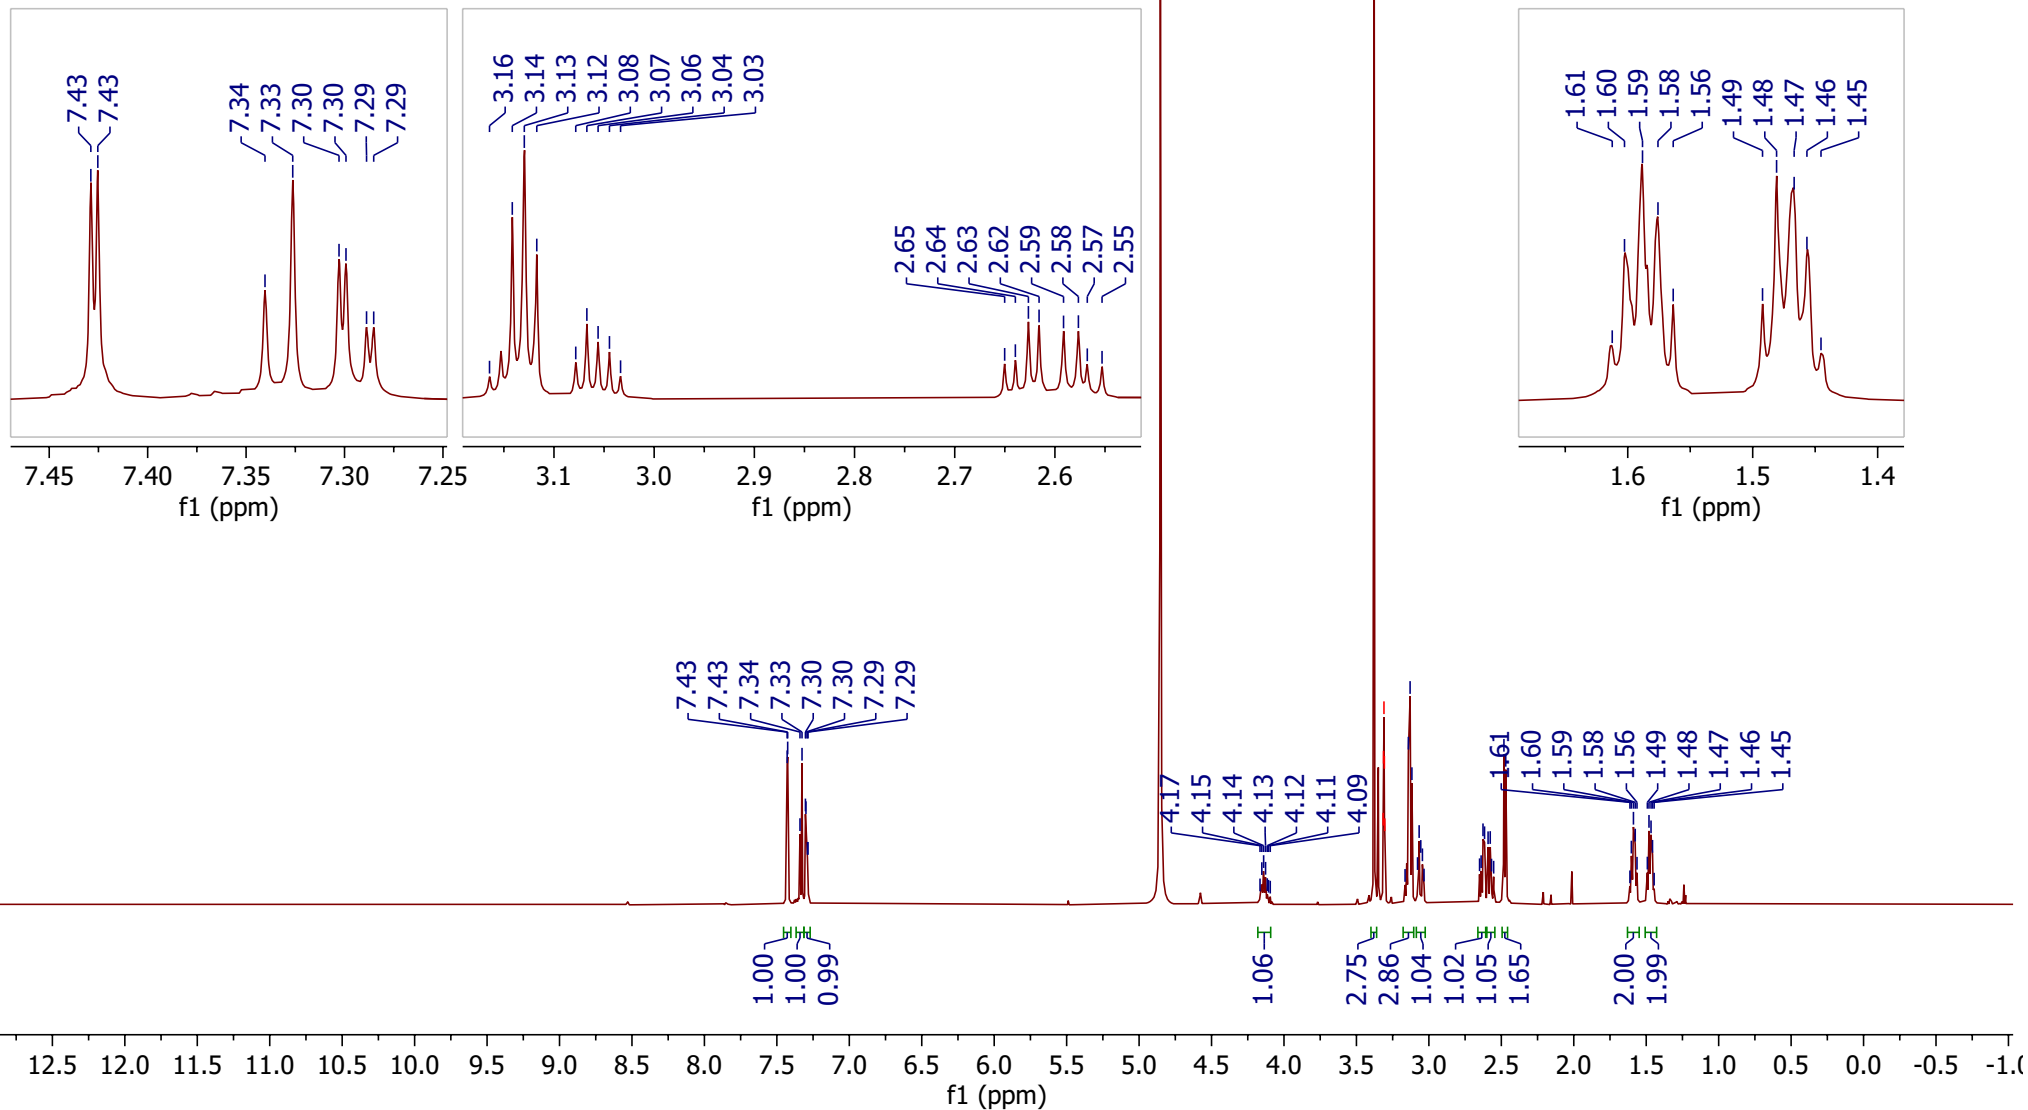

**Compound 54**  
**<sup>1</sup>H NMR (151 MHz, MeOD-d4)**

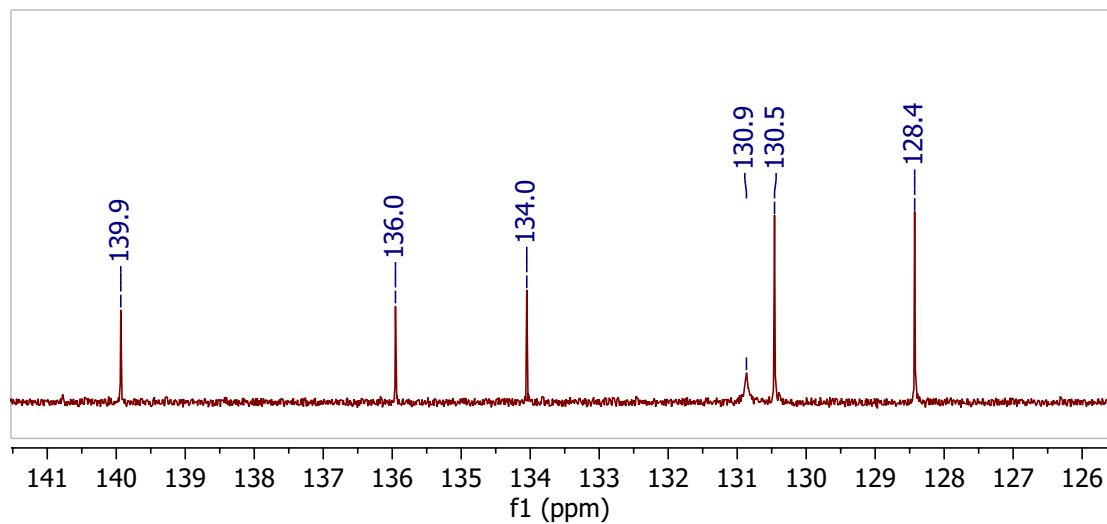

50.6  
49.4 MeOD  
49.3 MeOD  
48.7 MeOD  
48.6 MeOD  
41.5  
39.3  
38.5  
36.7

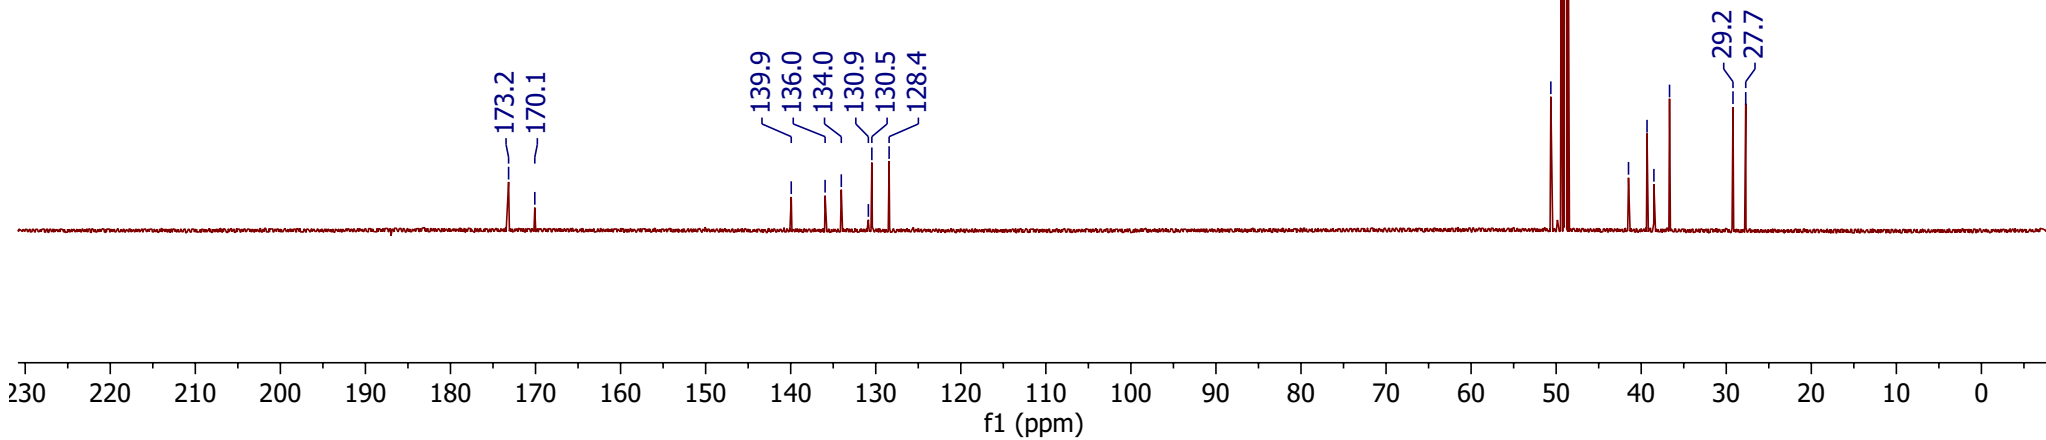

Compound 55  
<sup>1</sup>H NMR (600 MHz, MeOD-d4)

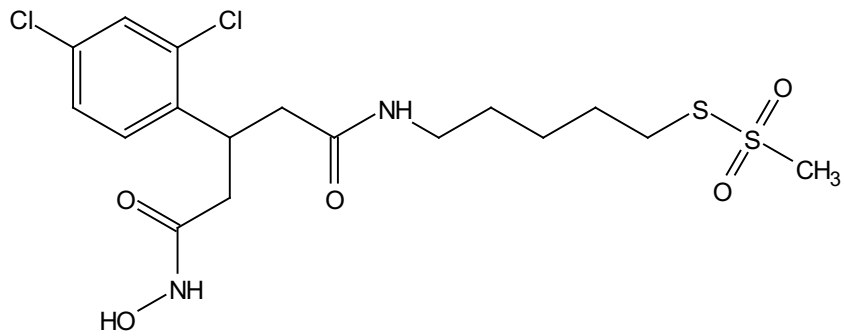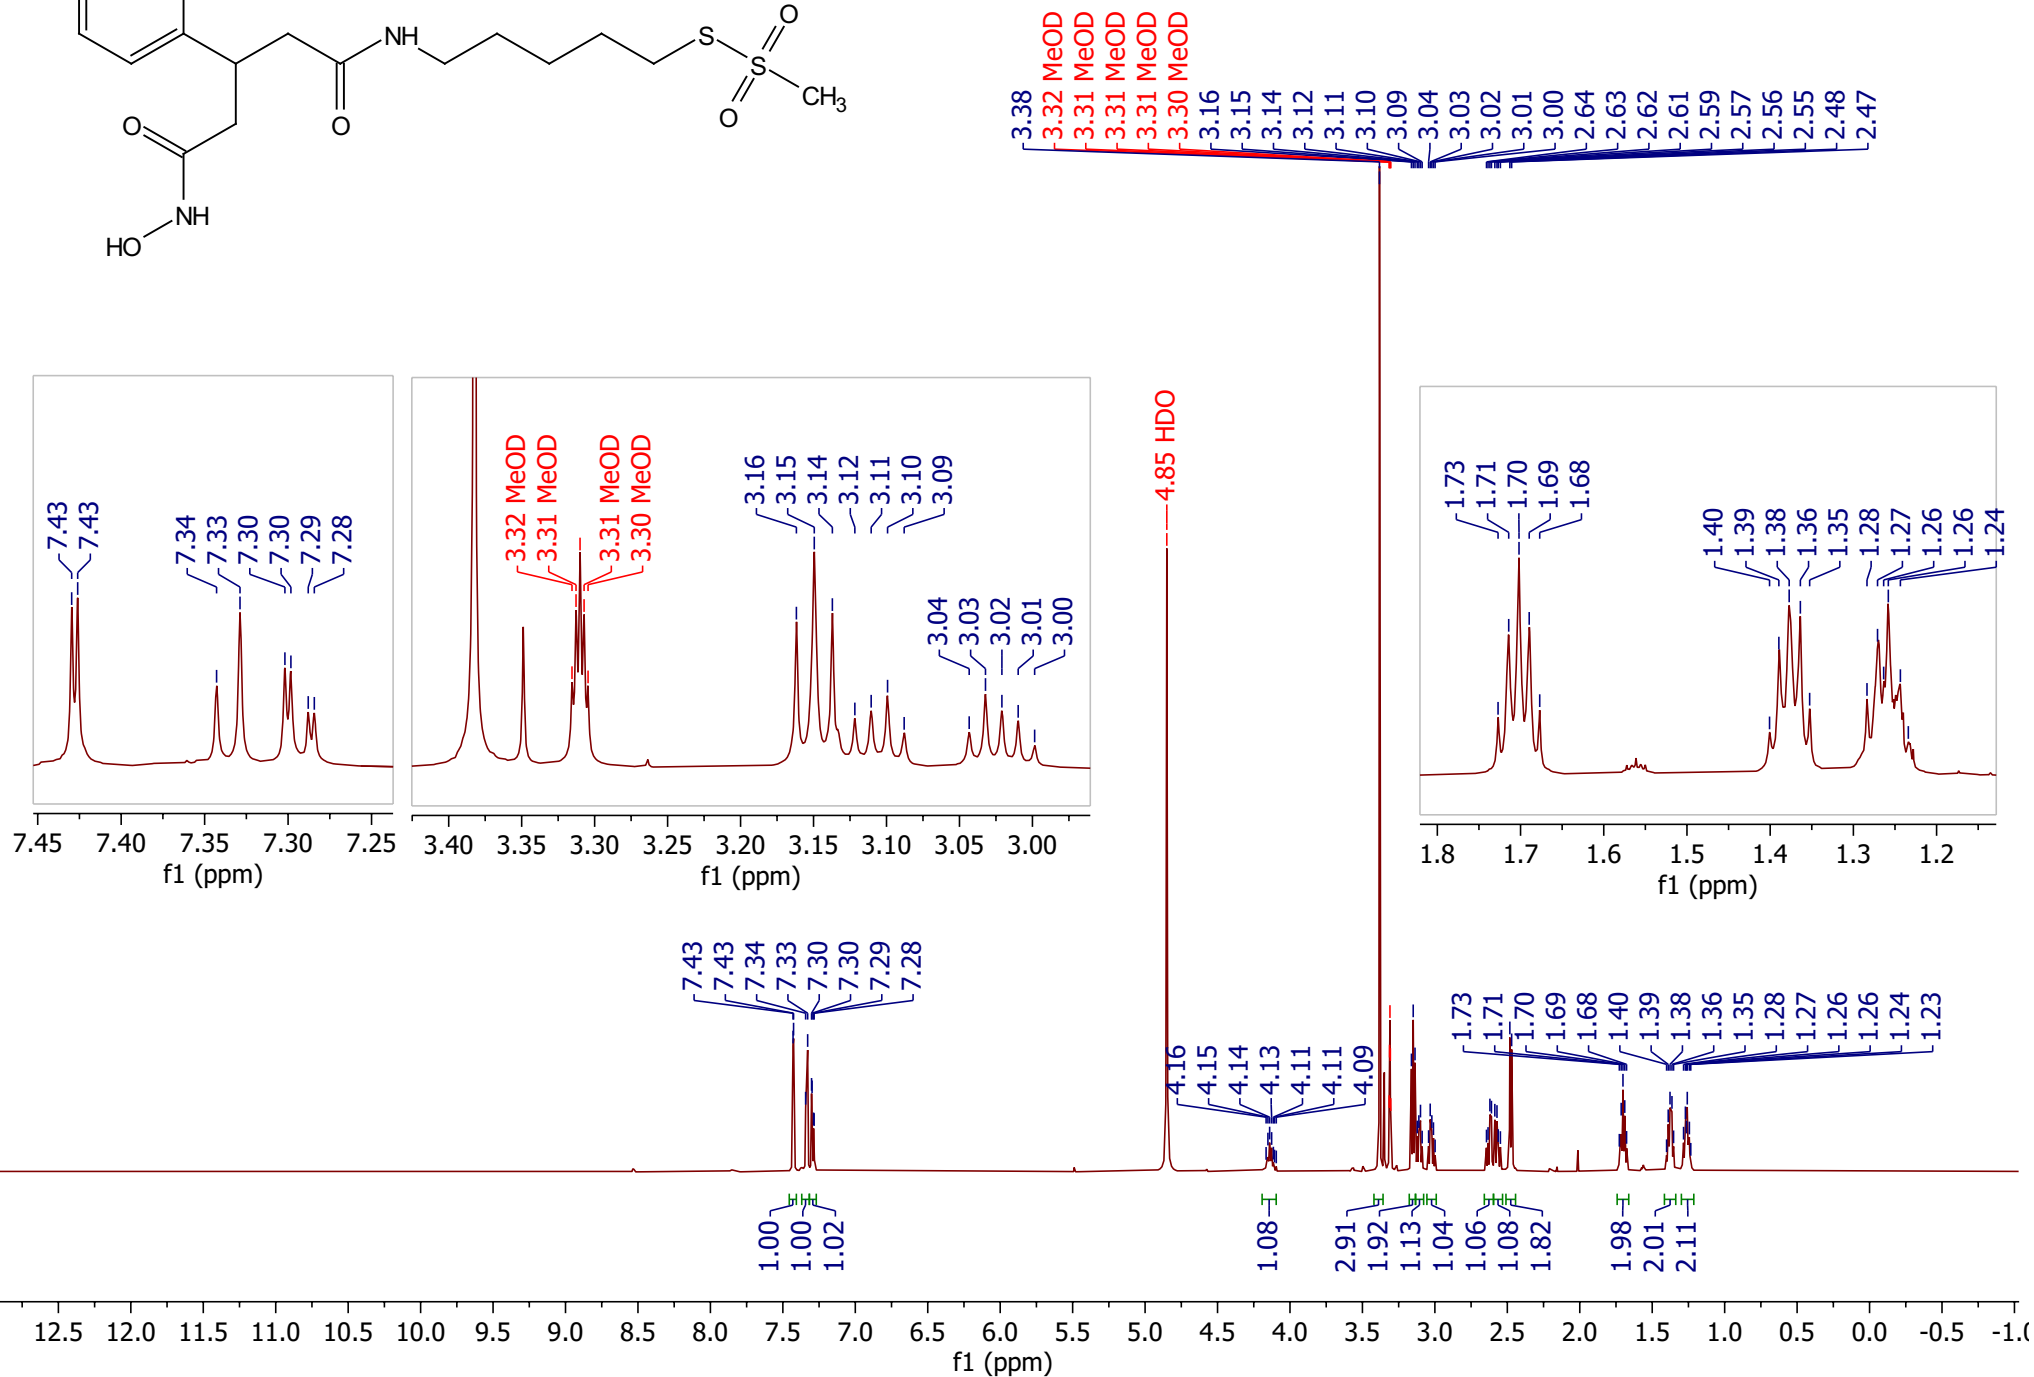

**Compound 55**  
**<sup>1</sup>H NMR (151 MHz, MeOD-d4)**

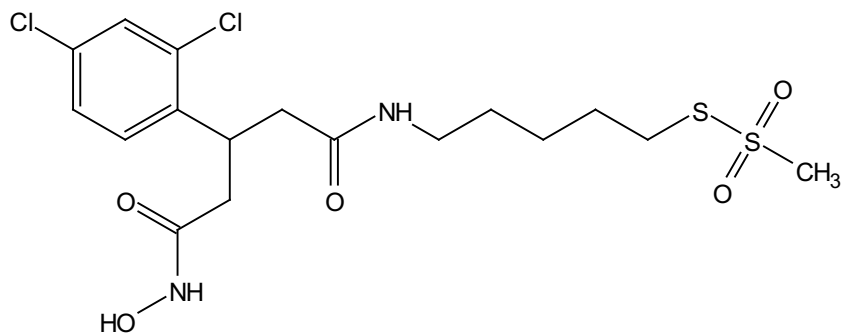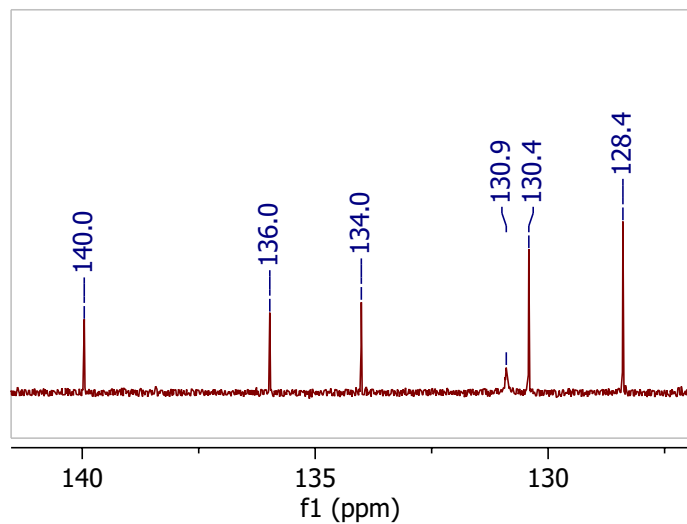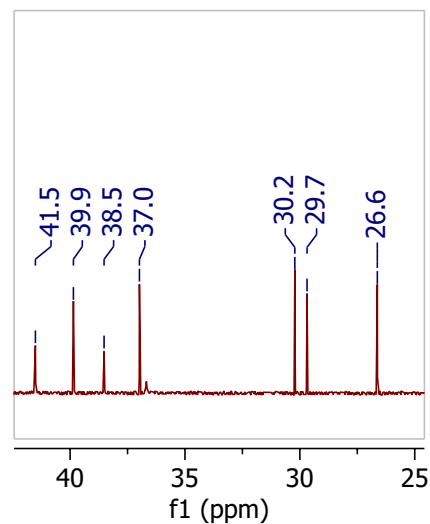

50.7 MeOD  
49.4 MeOD  
49.3 MeOD  
48.7 MeOD  
48.6 MeOD  
41.5  
39.9  
38.5  
37.0  
30.2  
29.7  
26.6

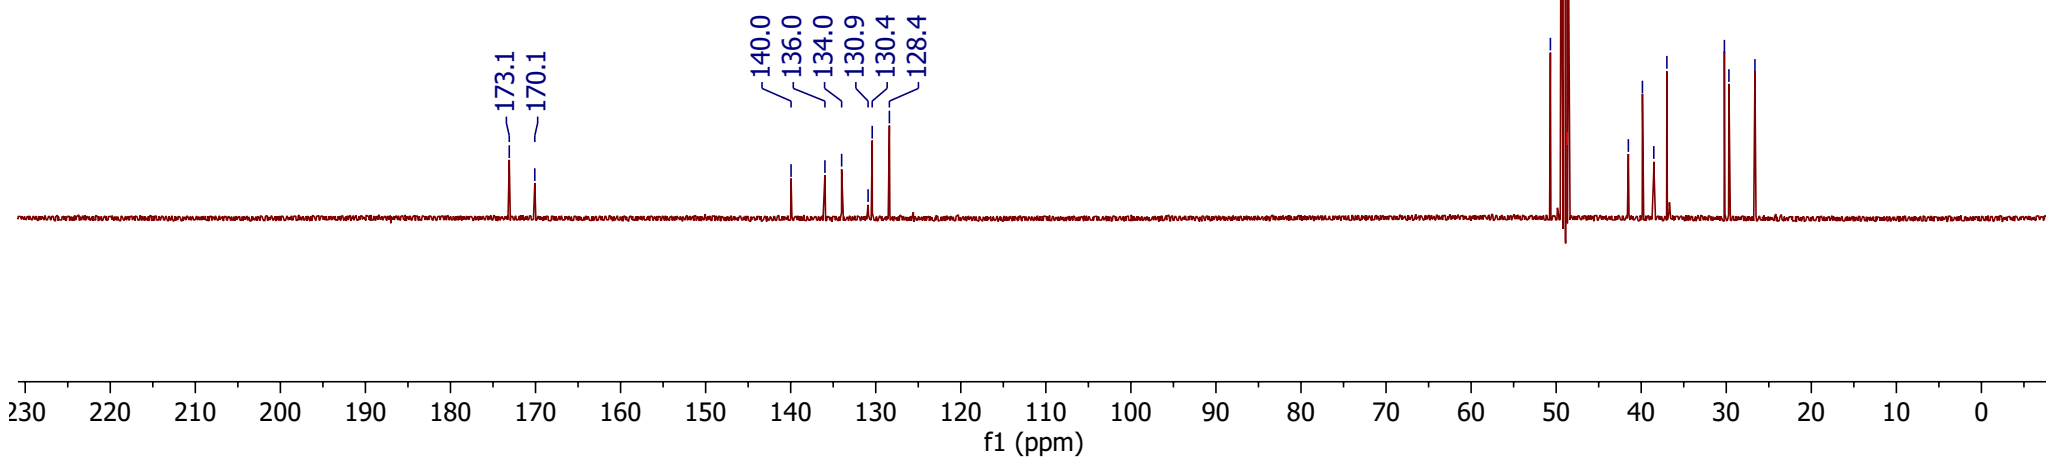

**Compound 56**  
<sup>1</sup>H NMR (600 MHz, MeOD-d4)

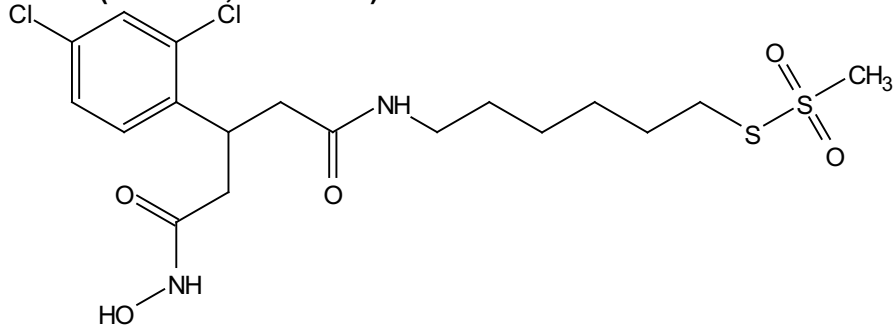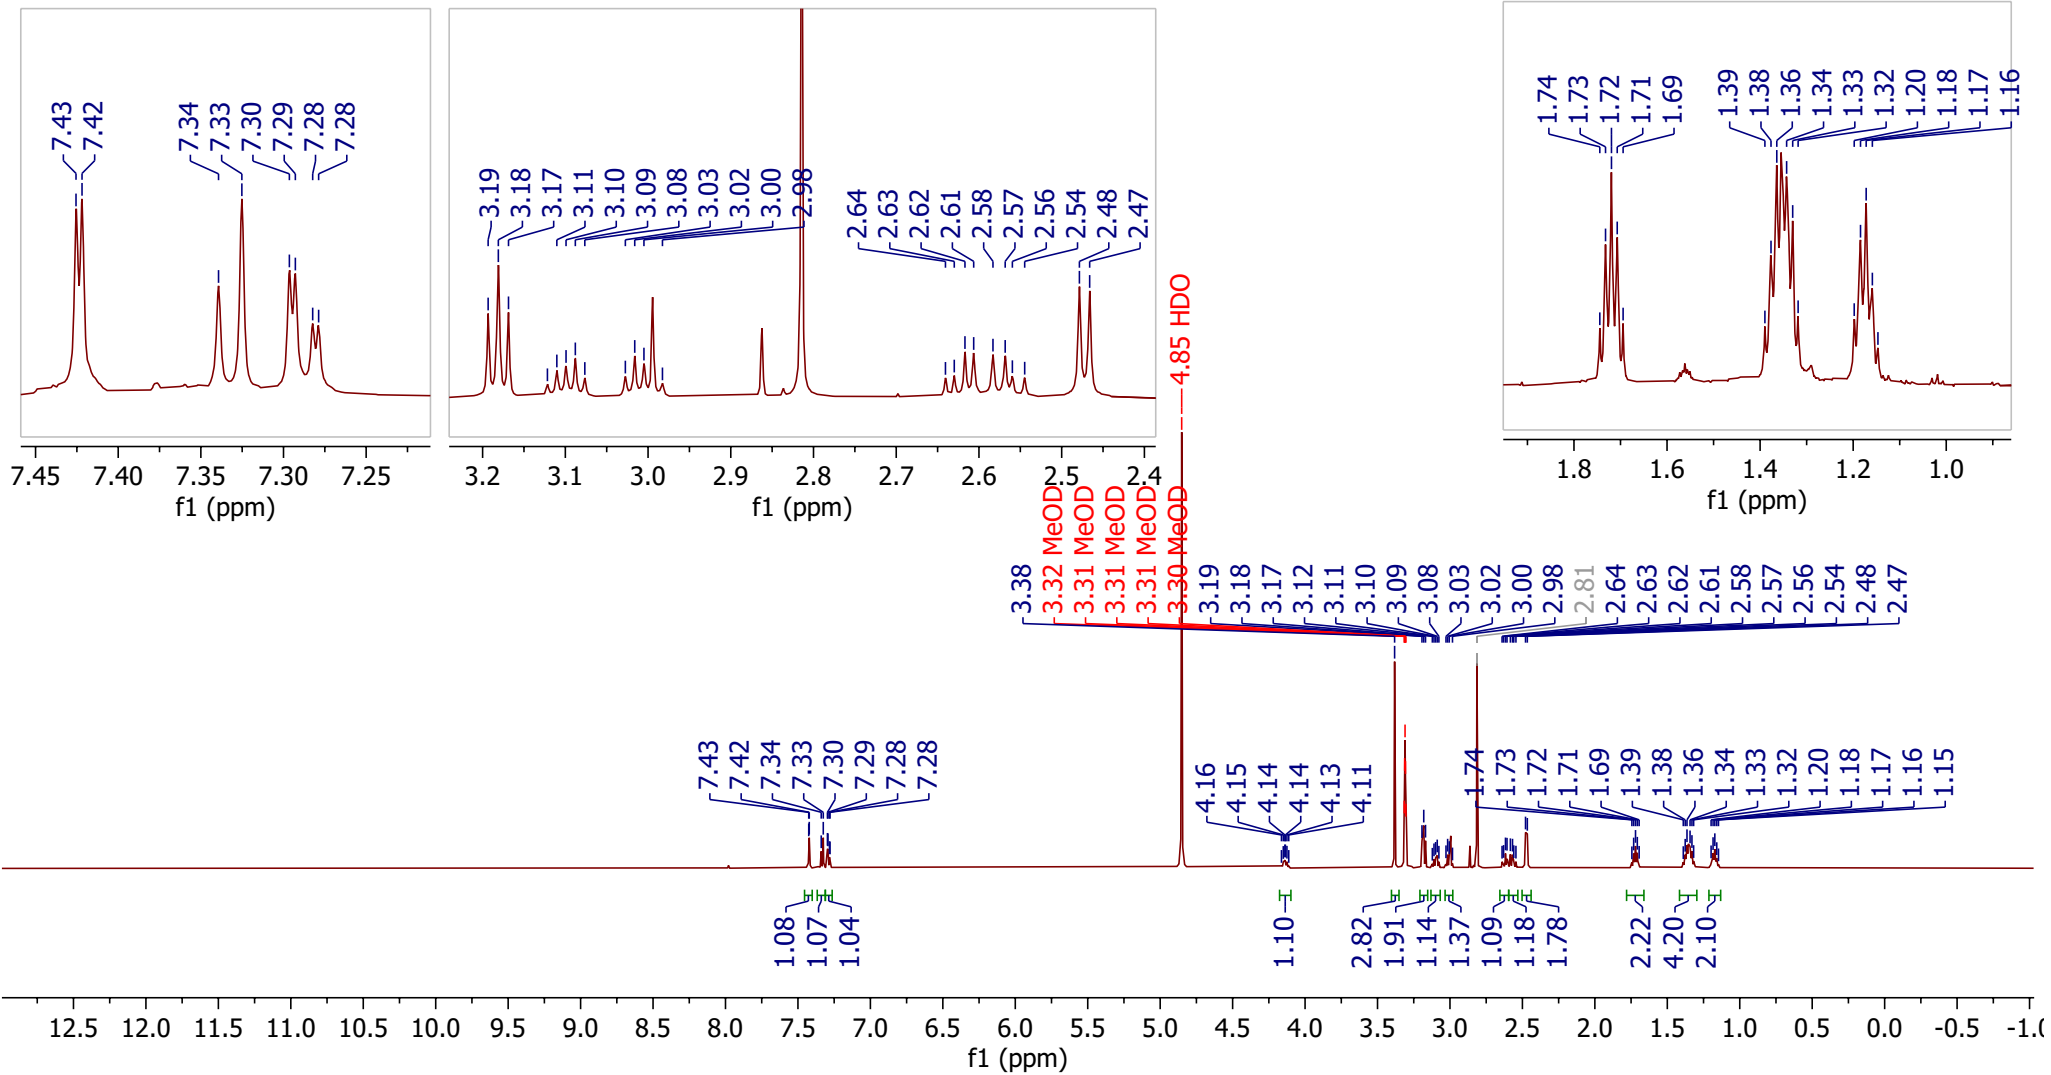



Compound 56  
<sup>1</sup>H NMR (151 MHz, MeOD-d4)

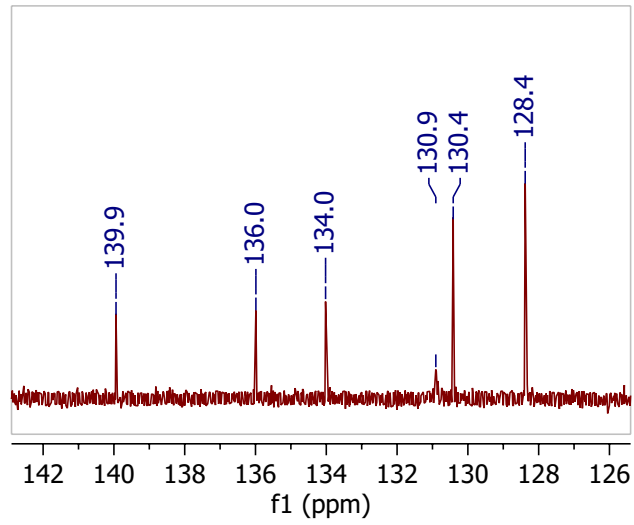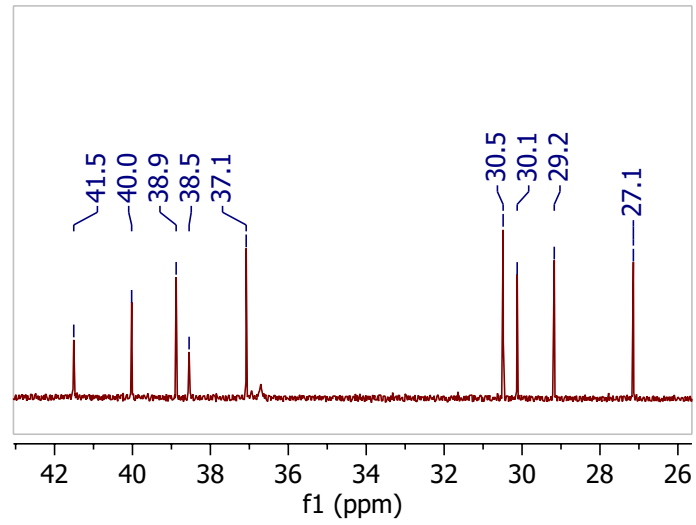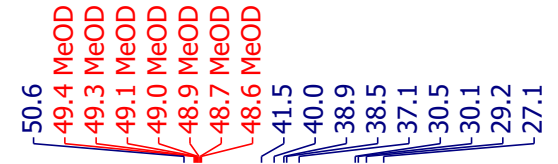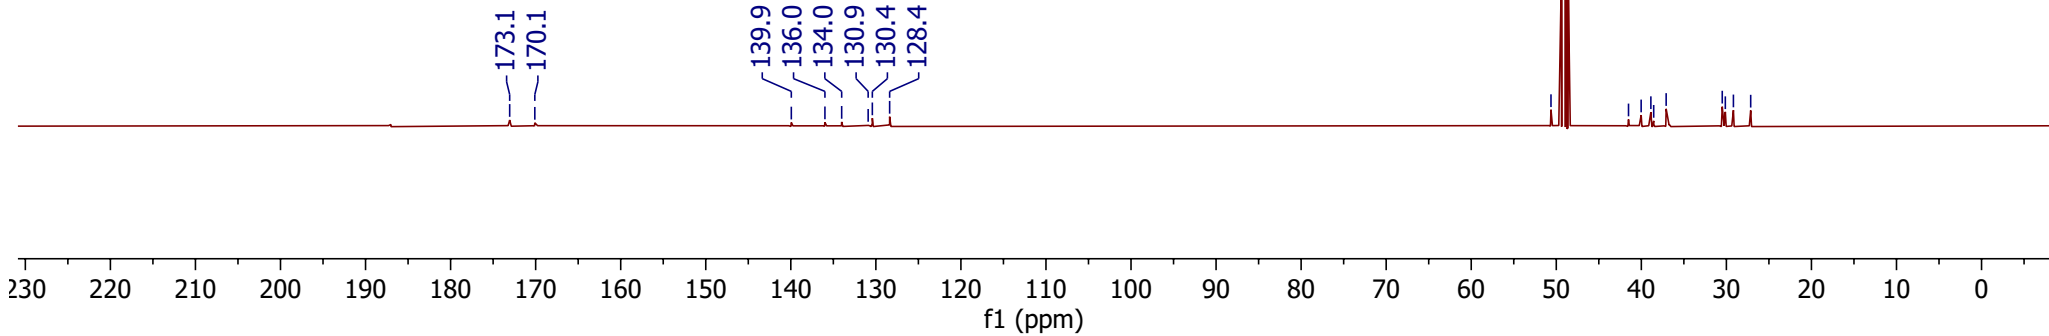

Compound 57  
<sup>1</sup>H NMR (600 MHz, DMSO-d6)

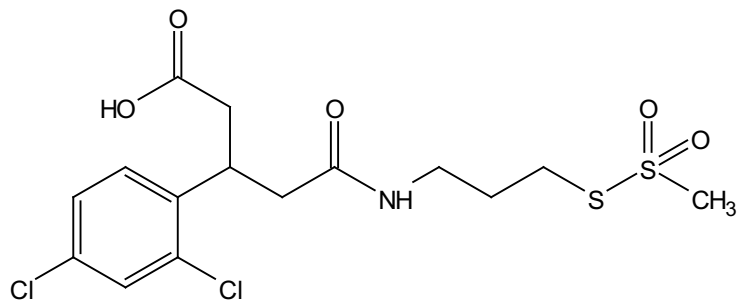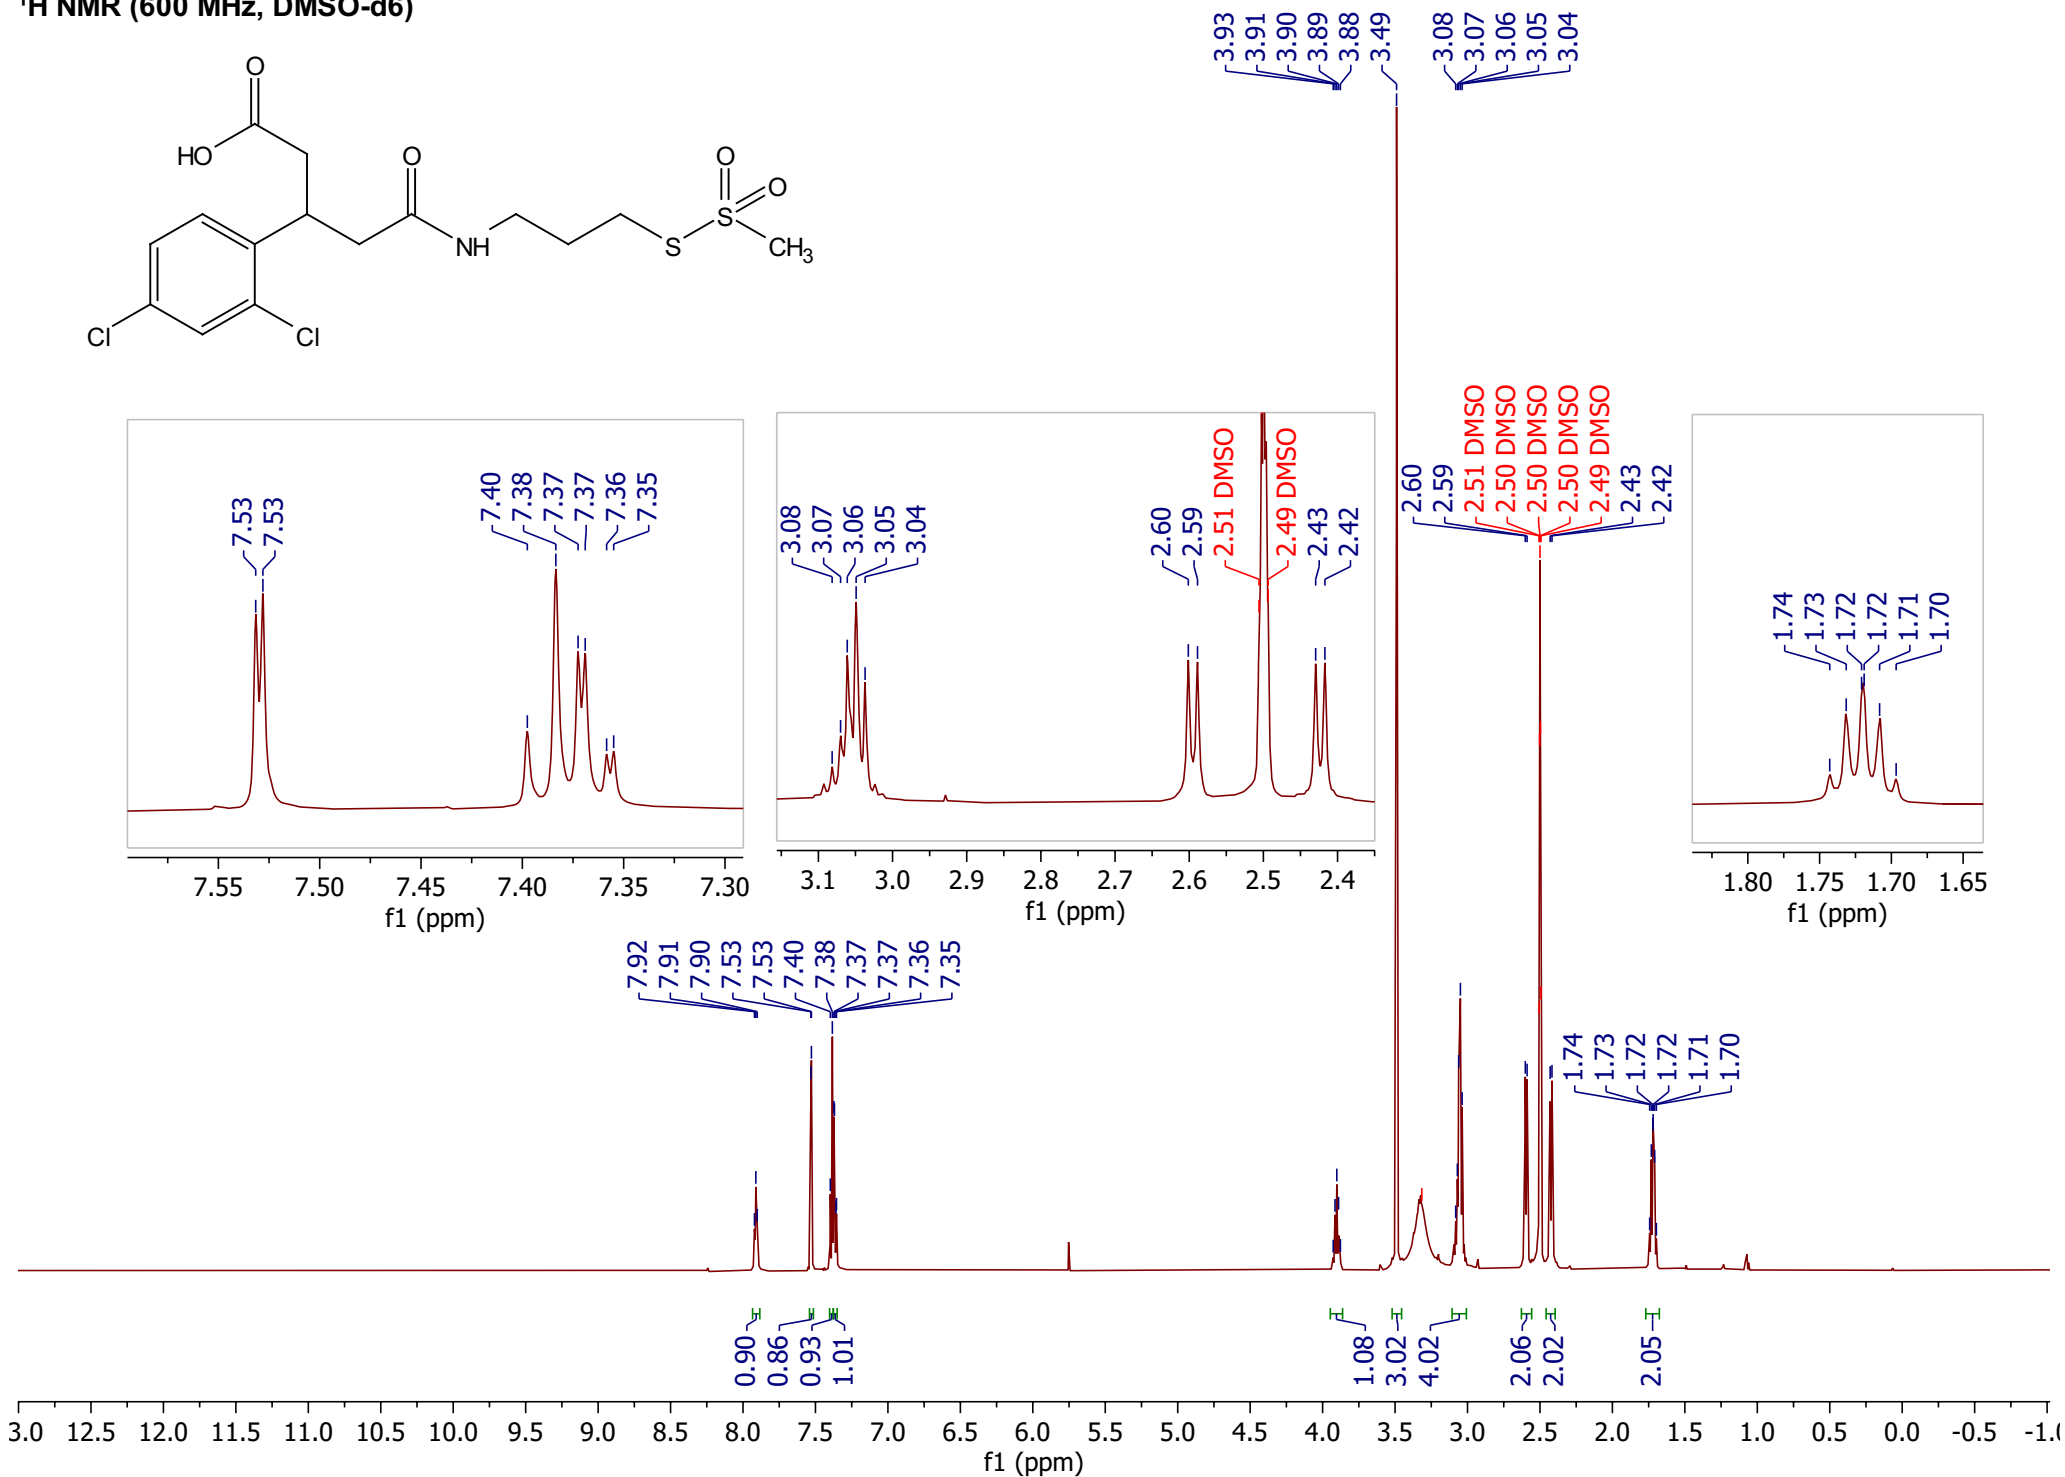

Compound 57  
<sup>1</sup>H NMR (151 MHz, DMSO-d6)

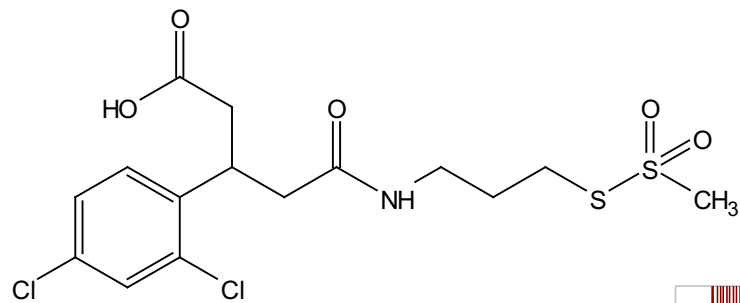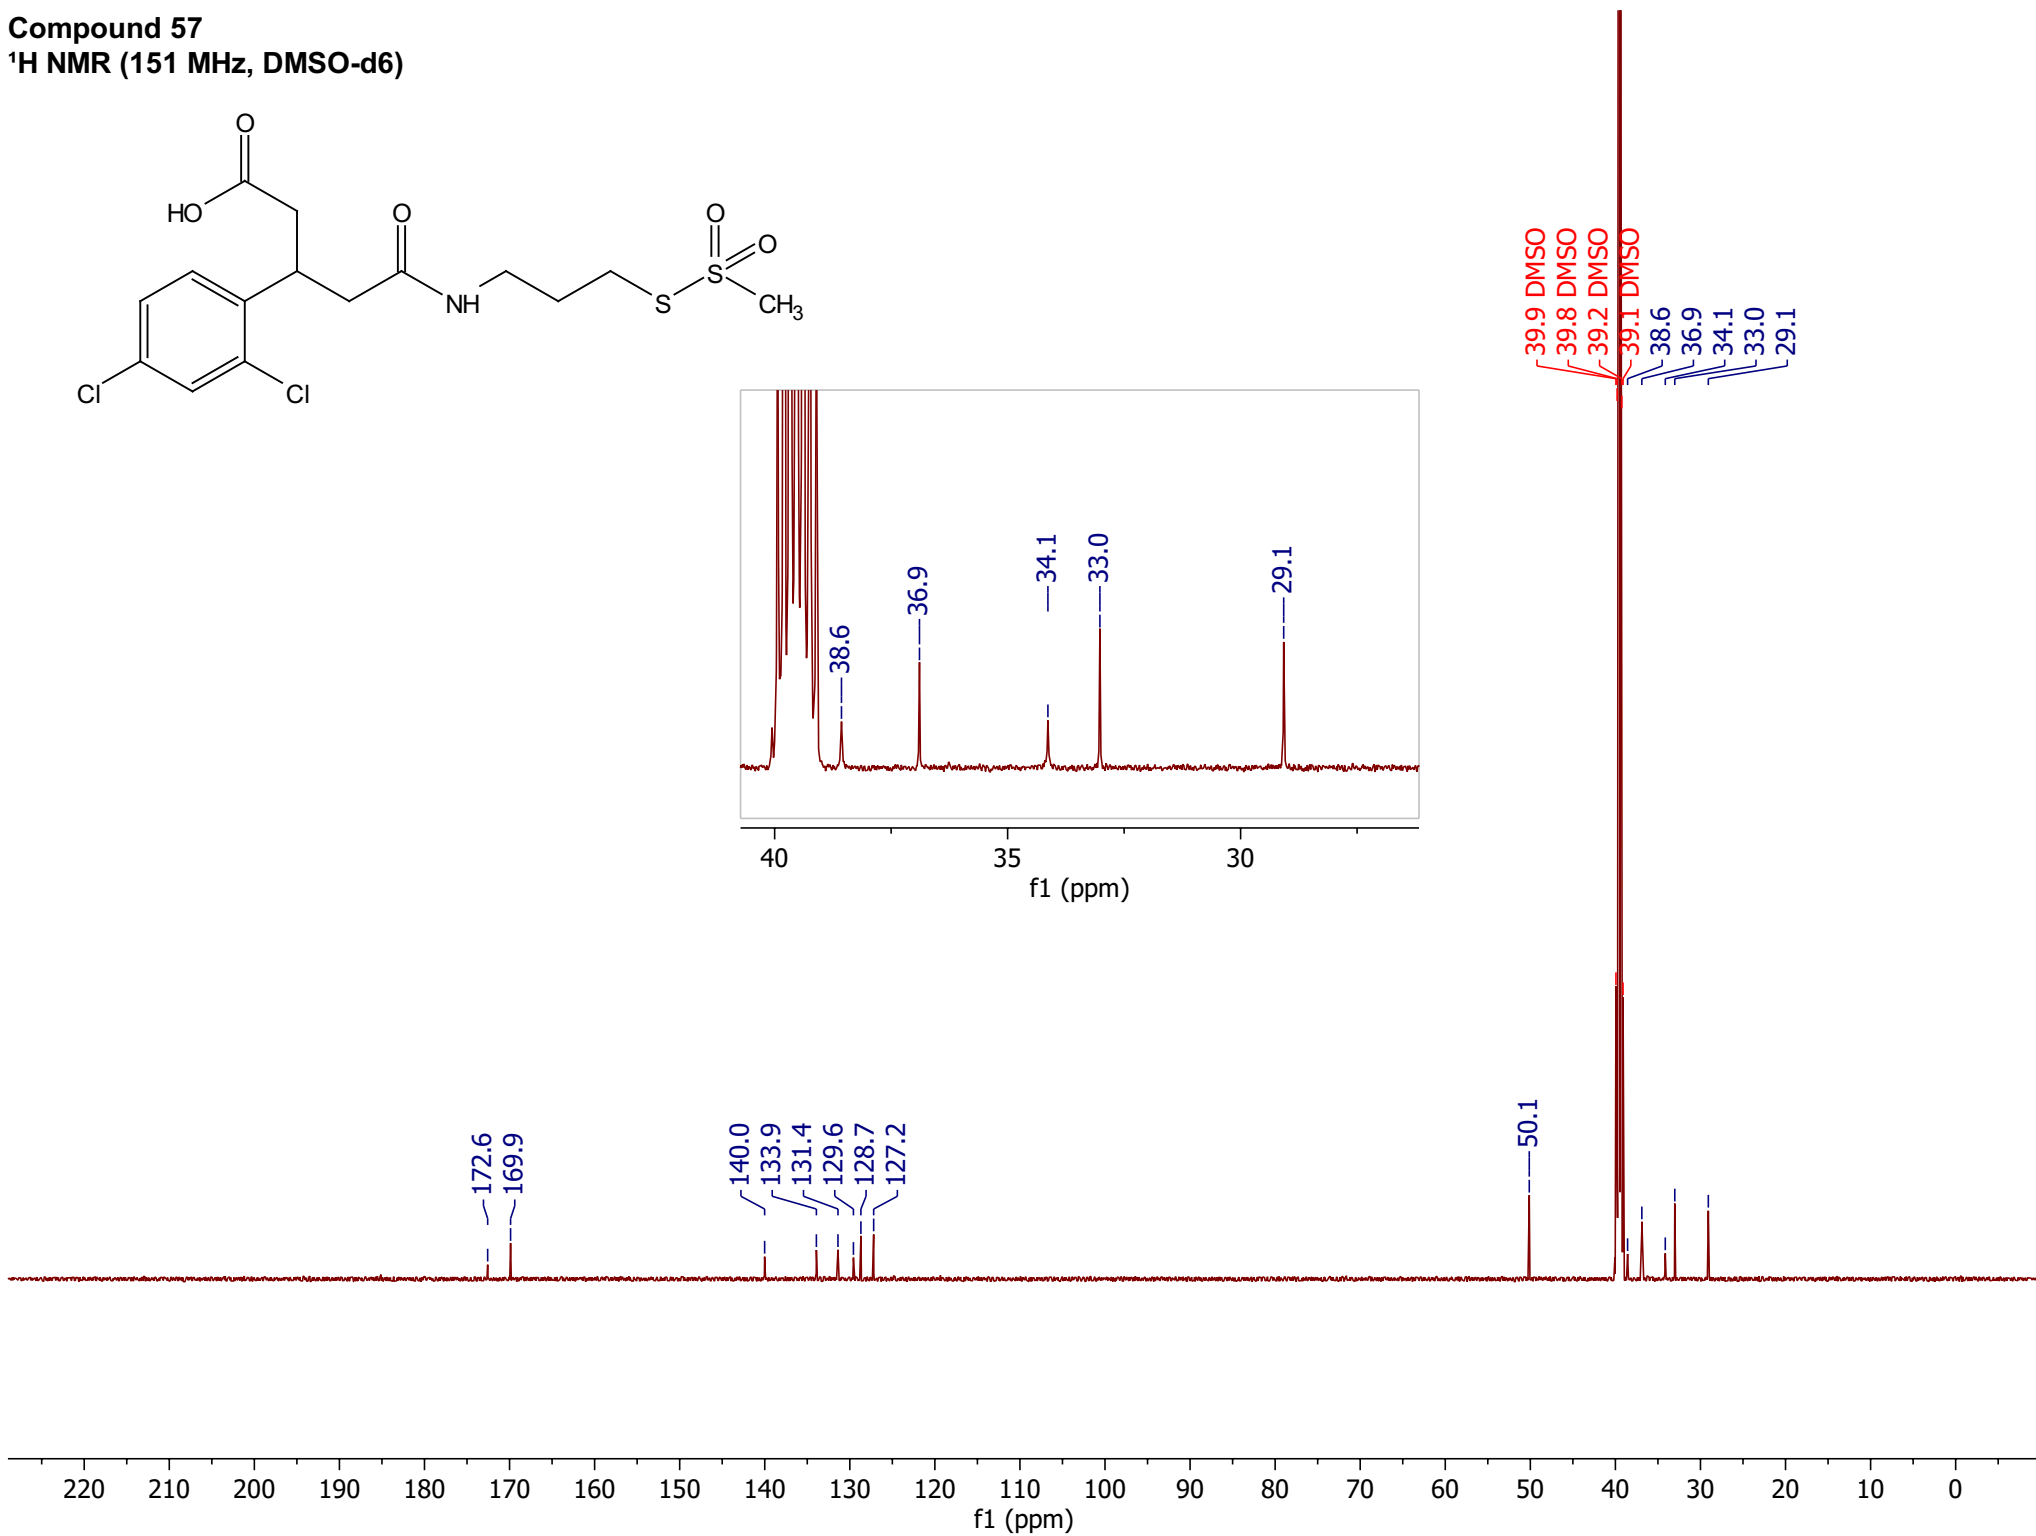

**Compound 58**  
<sup>1</sup>H NMR (600 MHz, DMSO-d<sub>6</sub>)

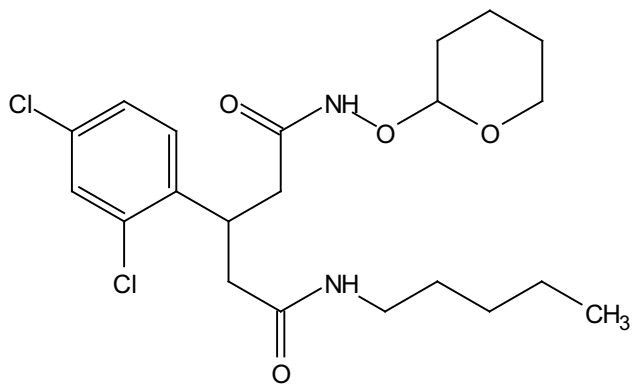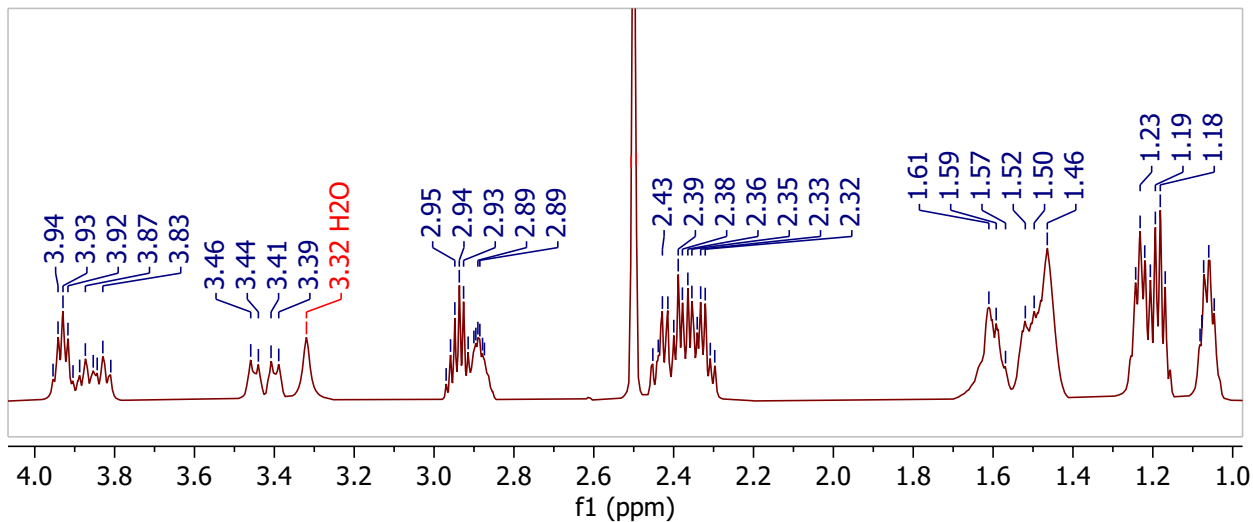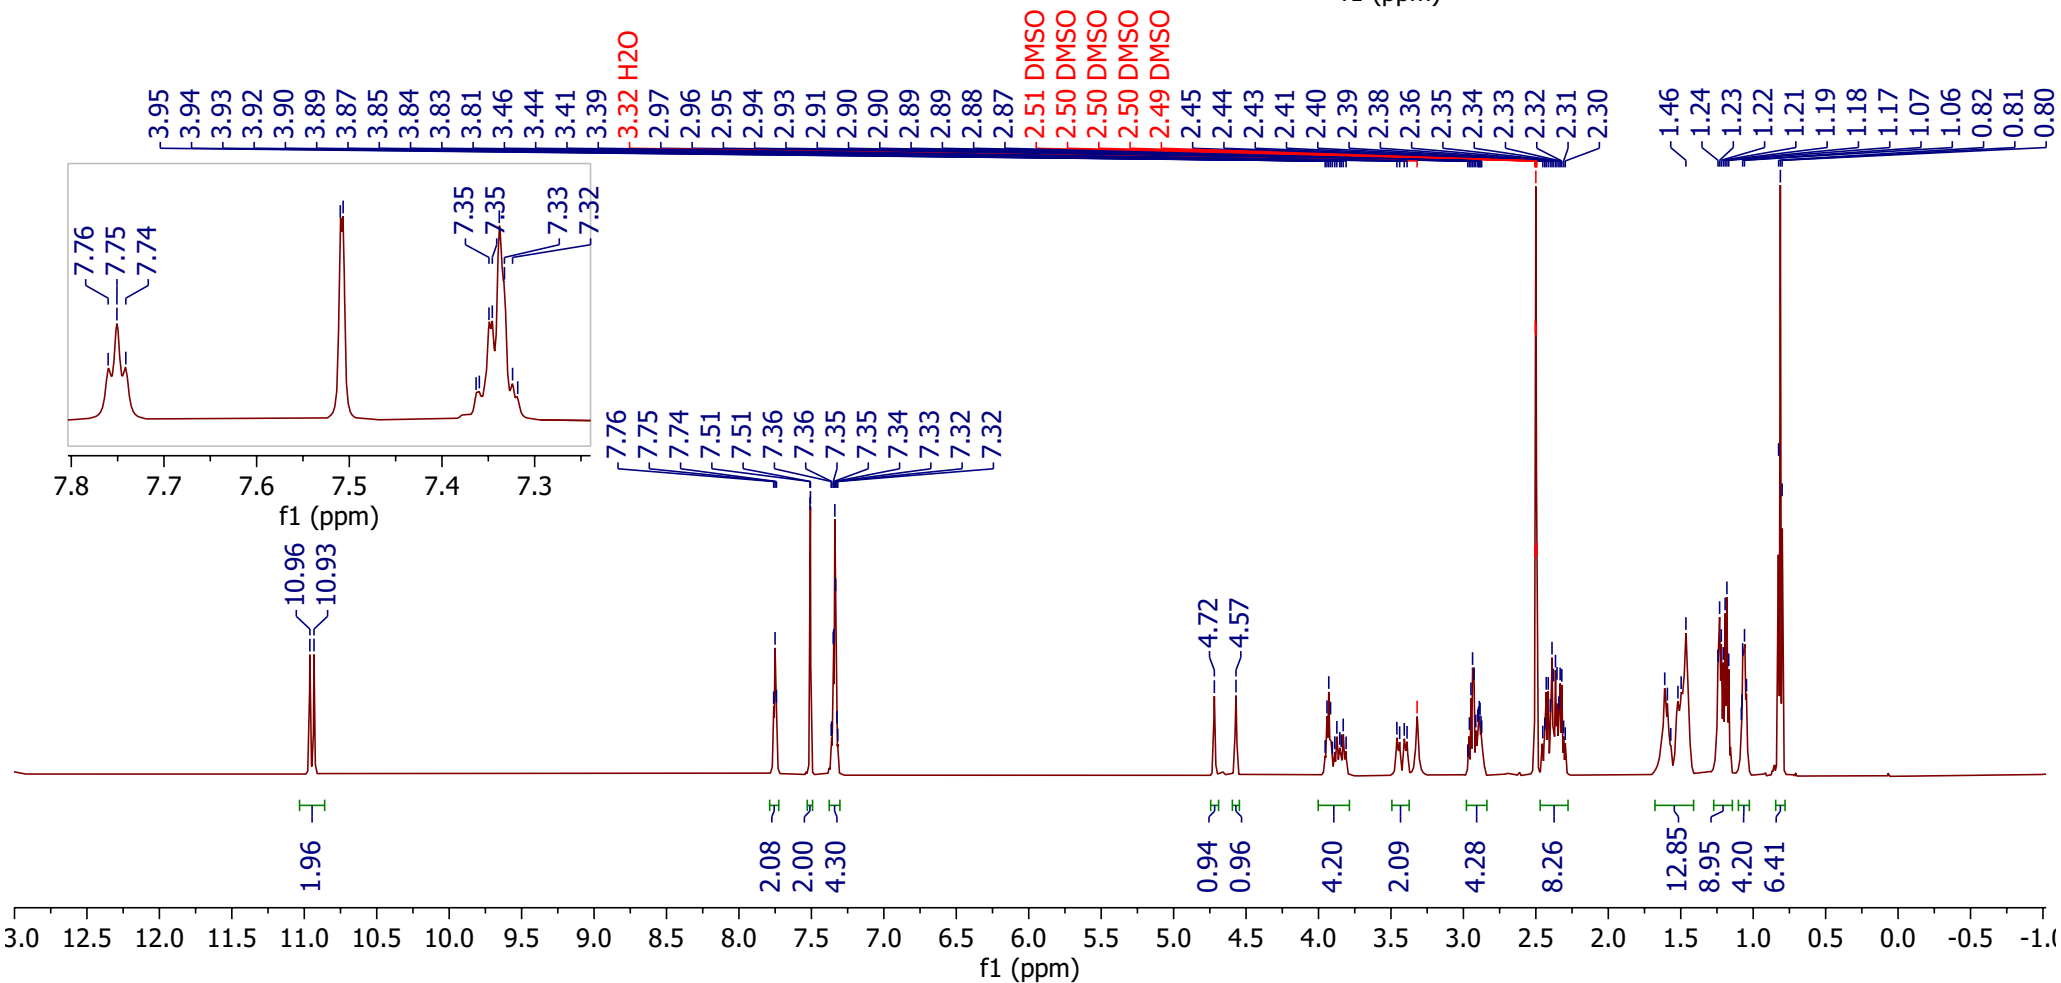

Compound 58  
<sup>1</sup>H NMR (151 MHz, DMSO-d6)

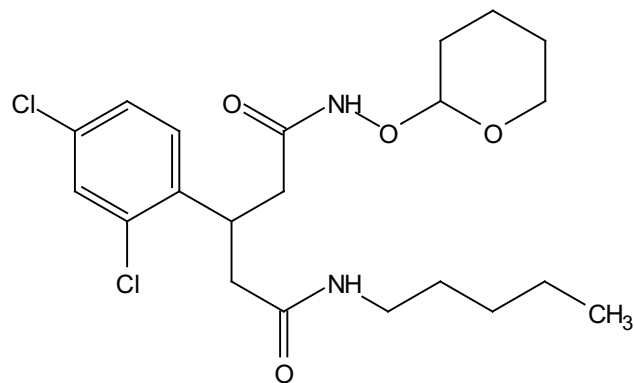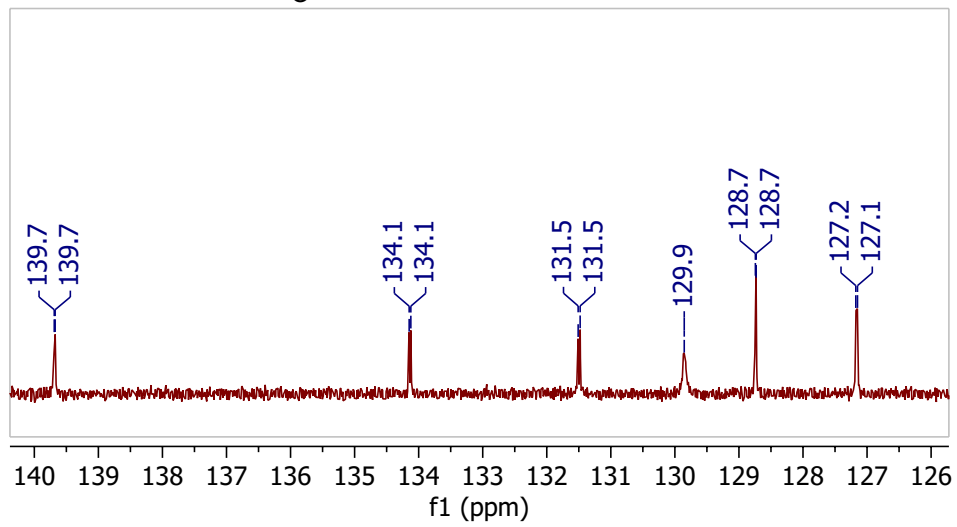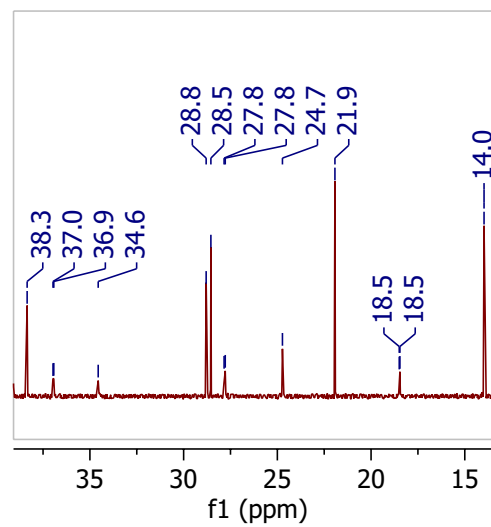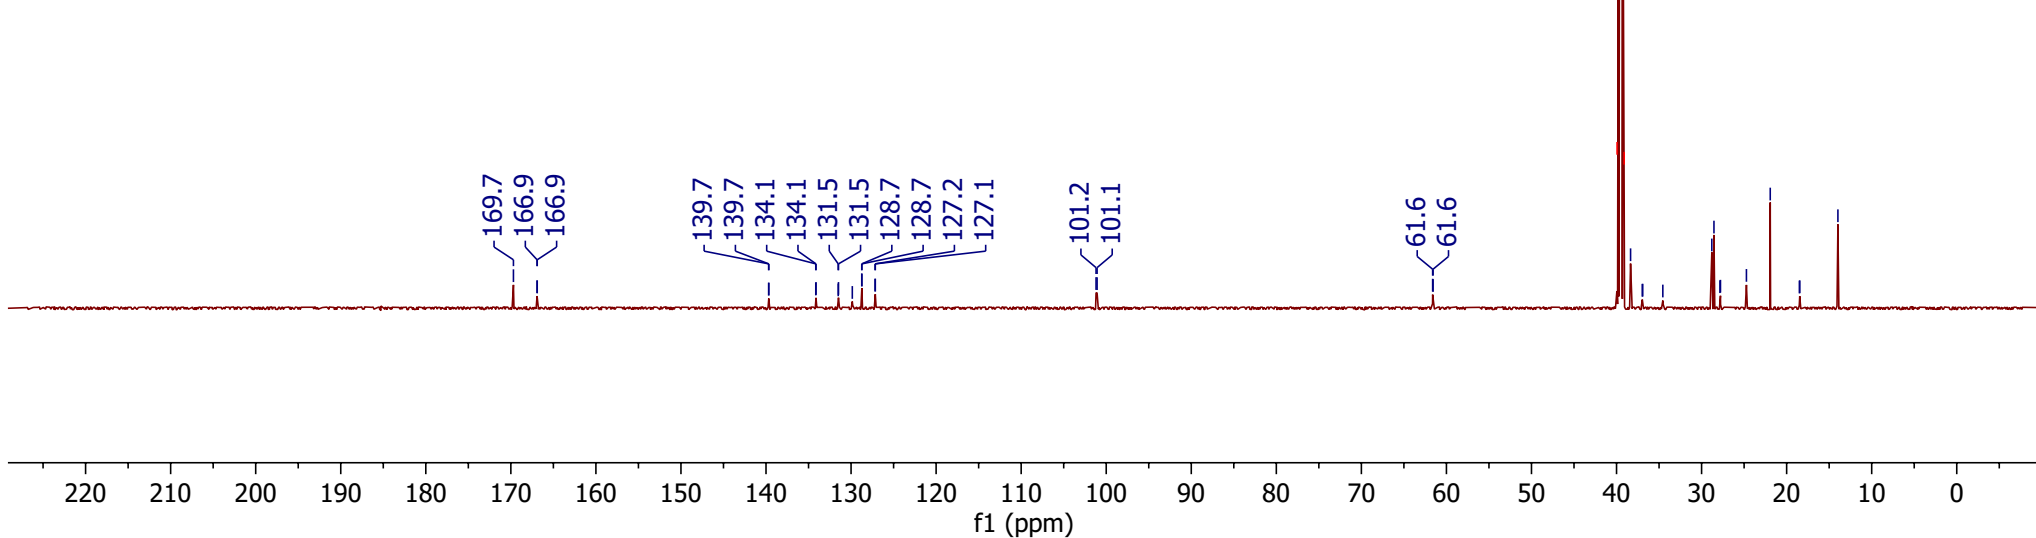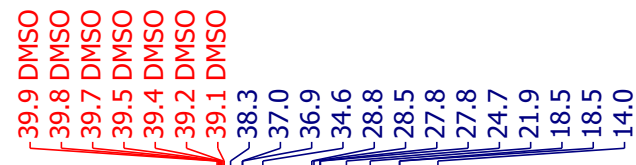

**Compound 59**  
**<sup>1</sup>H NMR (600 MHz, DMSO-d6)**

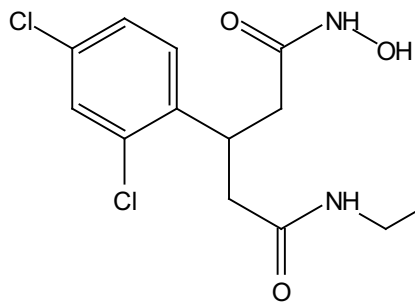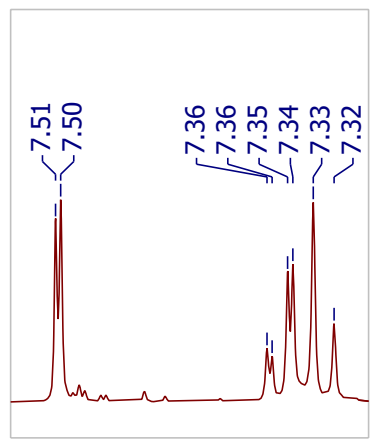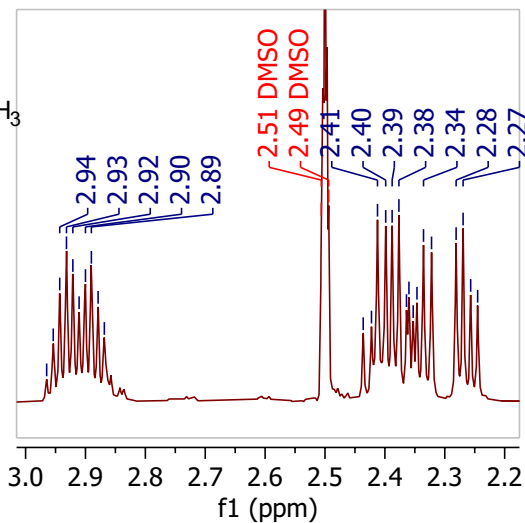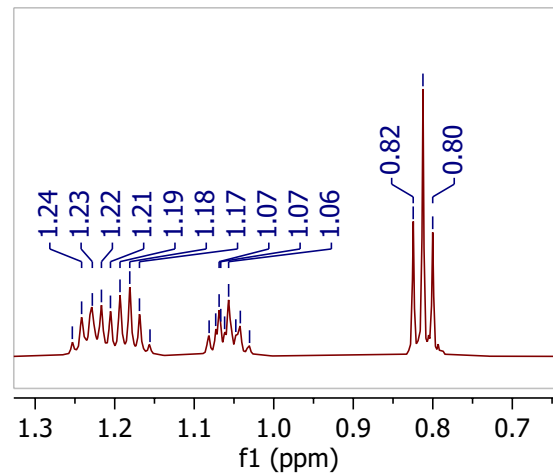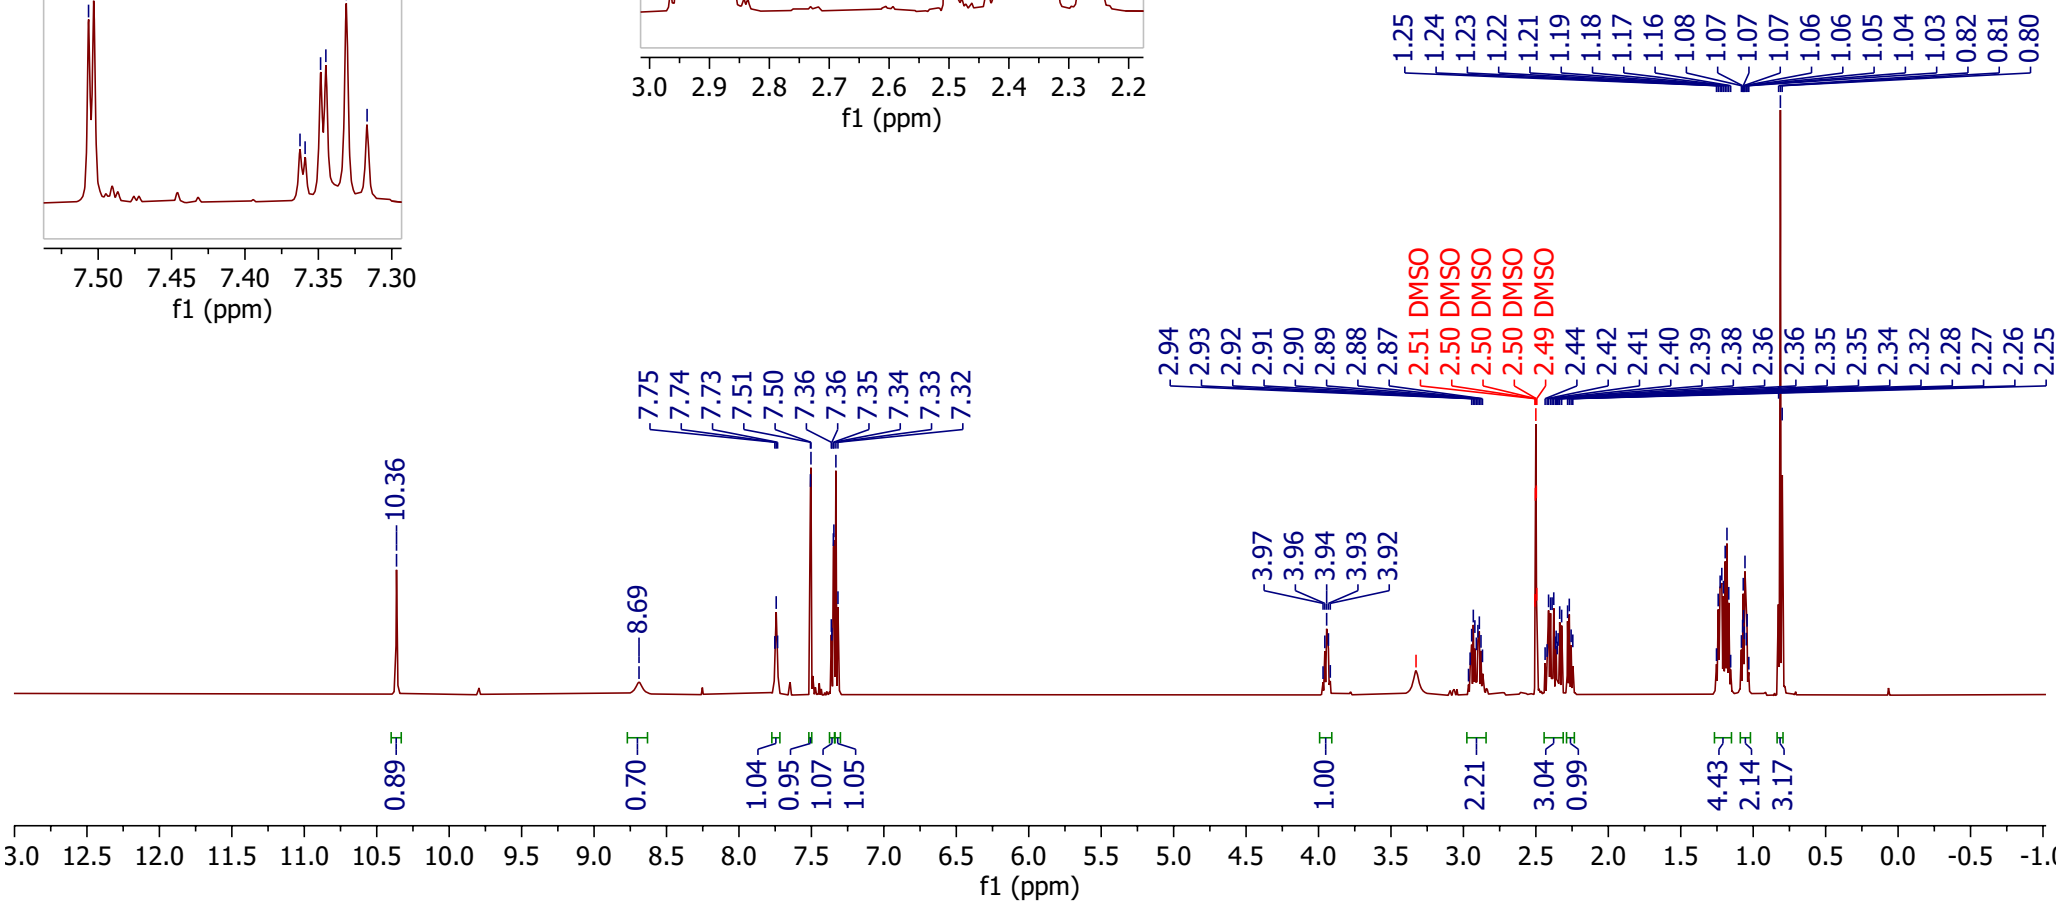

**Compound 59**  
**<sup>1</sup>H NMR (151 MHz, DMSO-d6)**

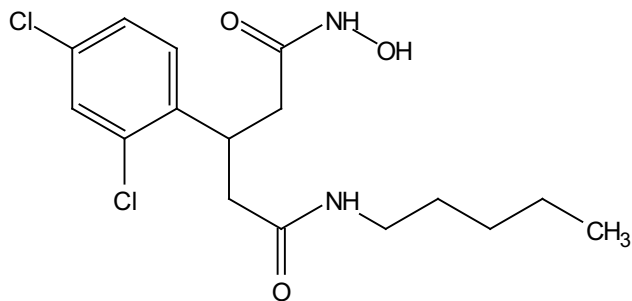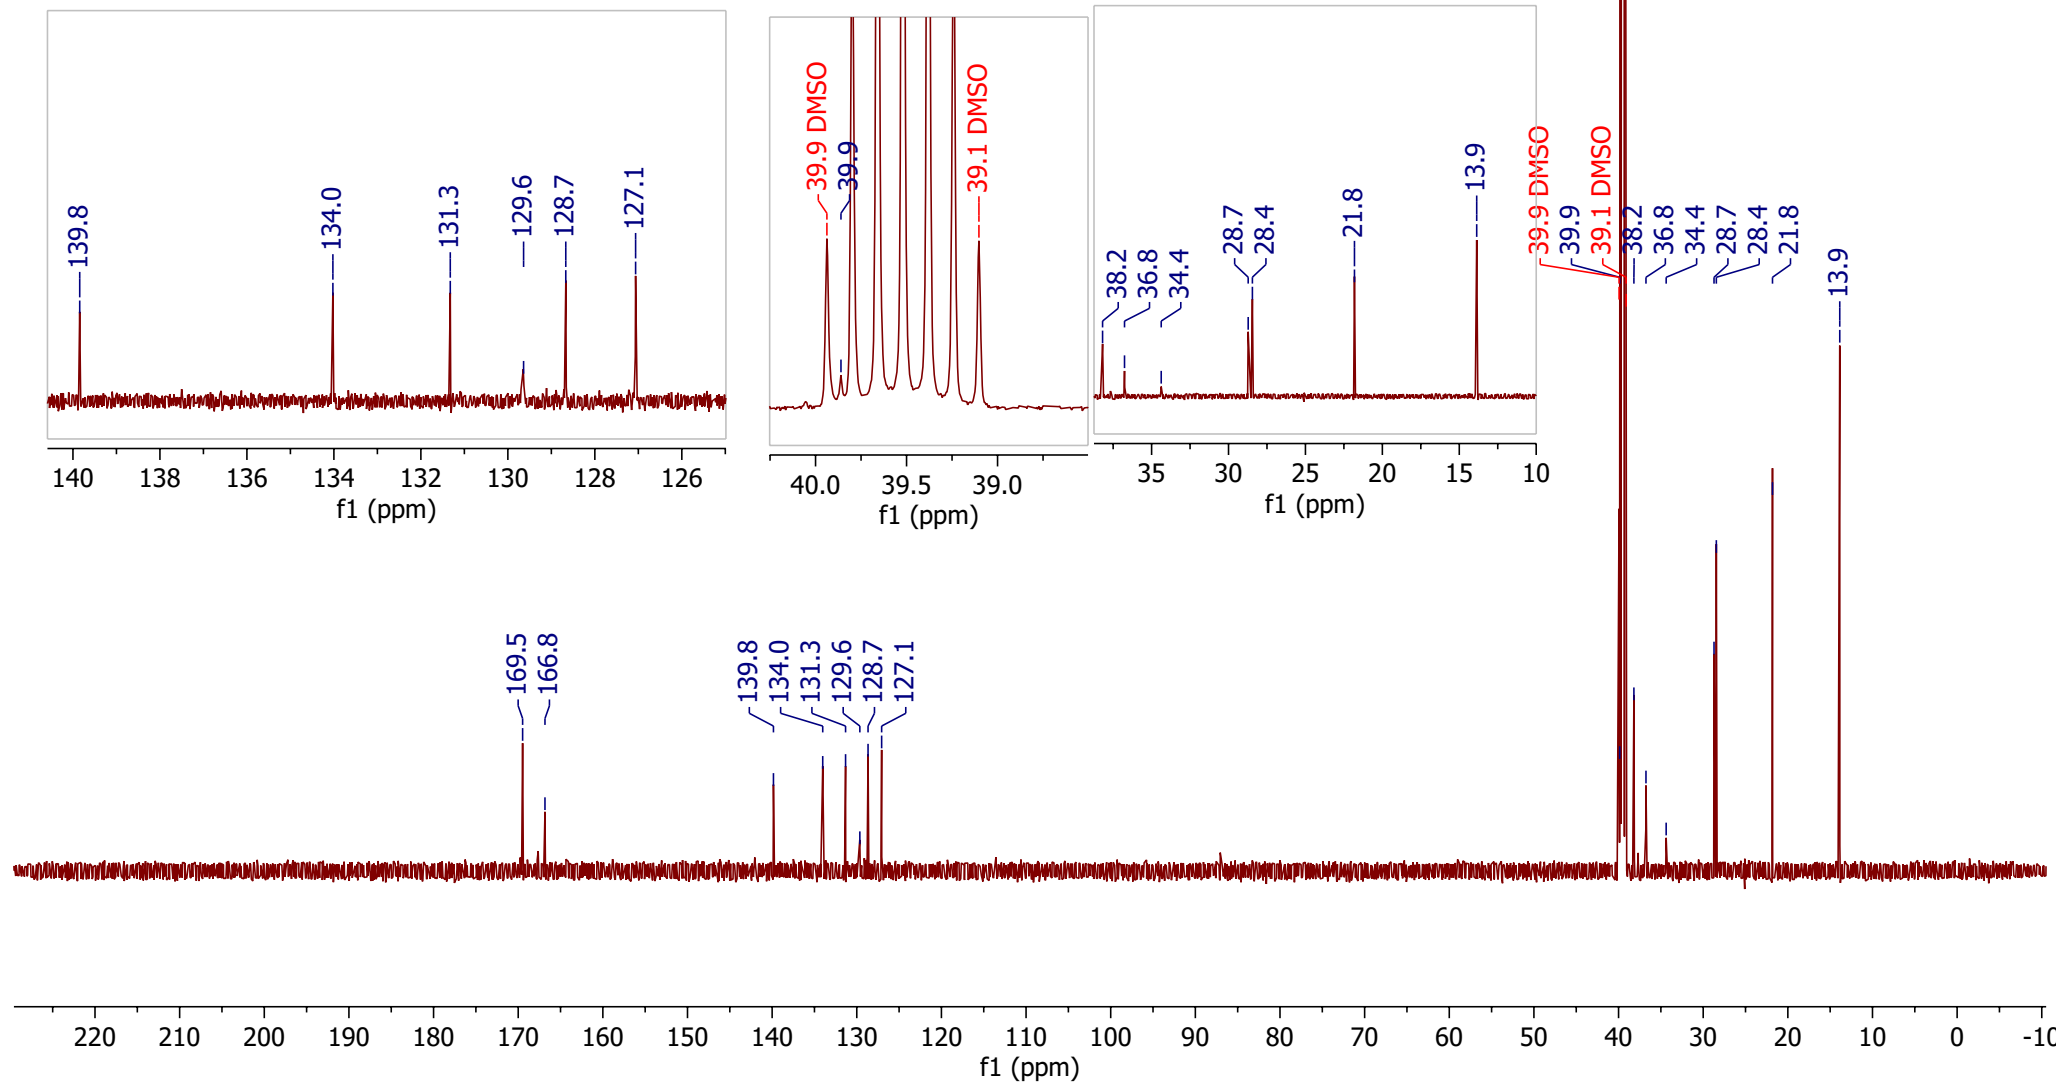

Supplement: NIHMS1633191-supplement-NMR_spectra.pdf [file NIHMS1633191-supplement-NMR_spectra.pdf]
